# Supplementary material for: Silver nanoparticle protein corona composition compared across engineered particle properties and environmentally relevant reaction conditions
Source: Royal Society of Chemistry journal article supplement (doi:10.1039/c4en00002a), 2014-01-01
Supplement: c4en00002a2.xlsx [file c4en00002a2.xlsx]

## Sheet: Table S1-Master Spreadsheet
										(+) 10 nm AgNP, 10 mM NaPi, pH 7.4					(-) 10 nm AgNP, 10 mM NaPi, pH 7.4					(-) 100 nm AgNP, 10 mM NaPi, pH 7.4					(-) 10 nm AgNP, 10 mM NaPi, pH 7.4 + 0.1 mM cys					(-) 10 nm AgNP, 10 mM NaPi, pH 7.4 + 0.8 mM NaCl					(-) 10 nm AgNP, 10 mM NaPi, pH 7.4 + 3.0 mM NaCl
identified protein, description	gene names	accession number	pI	length	molecular weight	Enzyme Commission number	Gene Ontology, Biological Process	Gene Ontology, Cellular Component	Gene Ontology, Molecular Function	Bound Fraction, average NSAF value	Bound Fraction, standard deviation in NSAF value	Unbound Fraction, average NSAF value	Unbound Fraction, standard deviation in NSAF value	Enrichment Factor	Bound Fraction, average NSAF value	Bound Fraction, standard deviation in NSAF value	Unbound Fraction, average NSAF value	Unbound Fraction, standard deviation in NSAF value	Enrichment Factor	Bound Fraction, average NSAF value	Bound Fraction, standard deviation in NSAF value	Unbound Fraction, average NSAF value	Unbound Fraction, standard deviation in NSAF value	Enrichment Factor	Bound Fraction, average NSAF value	Bound Fraction, standard deviation in NSAF value	Unbound Fraction, average NSAF value	Unbound Fraction, standard deviation in NSAF value	Enrichment Factor	Bound Fraction, average NSAF value	Bound Fraction, standard deviation in NSAF value	Unbound Fraction, average NSAF value	Unbound Fraction, standard deviation in NSAF value	Enrichment Factor	Bound Fraction, average NSAF value	Bound Fraction, standard deviation in NSAF value	Unbound Fraction, average NSAF value	Unbound Fraction, standard deviation in NSAF value	Enrichment Factor
Glyceraldehyde-3-phosphate dehydrogenase 3 OS=Saccharomyces cerevisiae (strain ATCC 204508 / S288c) GN=TDH3 PE=1 SV=3	TDH3 GPD3 YGR192C G7576	P00359	6.49	332	35615.5	1	Carbohydrate degradation; glycolysis; pyruvate from D-glyceraldehyde 3-phosphate: step 1/5.	Cytoplasm.	NAD binding; NADP binding; apoptotic process; fungal-type cell wall; gluconeogenesis; glyceraldehyde-3-phosphate dehydrogenase (NAD+) (phosphorylating) activity; glycolysis; lipid particle; mitochondrion; plasma membrane; reactive oxygen species metabolic process	0.0933173	0.00315586	0.0115868	0.00470575	8.05373	0.0488868	0.00358794	0.0410037	0.000989904	1.19225	0.0346947	0.0093785	0.0340918	0.000749694	1.01768	0.0296202	0.00907002	0.00883701	0.00336059	3.35184	0.0205096	0.00114077	0.00771952	0.0013287	2.65685	0.0298926	0.0194046	0.00770306	0.000472925	3.88062
Pyruvate kinase 1 OS=Saccharomyces cerevisiae (strain ATCC 204508 / S288c) GN=CDC19 PE=1 SV=2	CDC19 PYK1 YAL038W	P00549	7.54	500	54413.4	2	Carbohydrate degradation; glycolysis; pyruvate from D-glyceraldehyde 3-phosphate: step 5/5.	0	ATP binding; cytoplasm; glycolysis; magnesium ion binding; plasma membrane; potassium ion binding; pyruvate kinase activity; pyruvate metabolic process	0.0164381	0.00157809	0.000394967	5.44824e-05	41.6188	5.06115e-05	8.76617e-05	0	0	---	0.0122711	0.00179129	0.00974043	0.000460693	1.25981	0.0062762	0.00230346	0.00100219	0.000944497	6.26248	0.00398068	0.000669698	0.000676861	0.000358444	5.88108	0.00554662	0.00213516	0.000263219	6.98602e-05	21.0722
Cluster of Heat shock protein SSA2 OS=Saccharomyces cerevisiae (strain ATCC 204508 / S288c) GN=SSA2 PE=1 SV=3 (HSP72_YEAST)	SSA2 YLL024C L0931	P10592	4.94	639	69338.8	0	0	Cytoplasm. Secreted â€º cell wall.	ATP binding; ATPase activity; SRP-dependent cotranslational protein targeting to membrane, translocation; cytosol; extracellular region; fungal-type cell wall; fungal-type vacuole membrane; mitochondrion; plasma membrane; polysome; protein folding; response to stress; unfolded protein binding	0.00648428	0.00106558	0.00413605	0.000484561	1.56775	0.00541159	0.0002571	0.00755203	0.000697978	0.716574	0.00525413	0.000742745	0.00951166	0.000833001	0.552389	0.00386221	0.000460974	0.0040946	0.000450424	0.943245	0.00257929	0.000231348	0.00447395	0.000306812	0.576513	0.00285841	0.000775816	0.00424321	0.00054279	0.673643
Heat shock protein SSA1 OS=Saccharomyces cerevisiae (strain ATCC 204508 / S288c) GN=SSA1 PE=1 SV=4	SSA1 YAL005C	P10591	4.99	642	69526.1	0	0	Cytoplasm. Secreted â€º cell wall.	ATP binding; ATPase activity; SRP-dependent cotranslational protein targeting to membrane, translocation; cytoplasmic translation; extracellular region; fungal-type cell wall; fungal-type vacuole membrane; nucleus; plasma membrane; polysome; protein import into nucleus, translocation; protein refolding; protein targeting to mitochondrion; response to stress; unfolded protein binding	0.00635383	0.00127663	0.00431257	0.000556613	1.47333	0.00520859	0.00021398	0.0068479	0.000870503	0.760611	0.00390426	0.000541772	0.0072476	0.000859983	0.538696	0.00362046	0.000448473	0.00399004	0.00014611	0.907376	0.00235982	0.000317792	0.00427801	0.00040214	0.551615	0.00270826	0.000614898	0.00379938	0.000311249	0.712816
Heat shock protein SSA3 OS=Saccharomyces cerevisiae (strain ATCC 204508 / S288c) GN=SSA3 PE=1 SV=3	SSA3 YBL075C YBL06.07 YBL0610	P09435	5.05	649	70546.8	0	0	Cytoplasm.	ATP binding; ATPase activity; SRP-dependent cotranslational protein targeting to membrane, translocation; cytosol; protein folding; response to stress; unfolded protein binding	0.00150238	0.000342337	0.00131334	9.89787e-05	1.14394	0.00139196	0.000190694	0.00122644	0.000163617	1.13496	0.000942791	0.000246792	0.0014853	0.000198689	0.634748	0.000881449	0.000168495	0.00079761	0.000156579	1.10511	0.000625294	6.93888e-05	0.000764008	0.000135723	0.818439	0.000608343	0.000164916	0.000735415	0.000101067	0.827211
Heat shock protein SSA4 OS=Saccharomyces cerevisiae (strain ATCC 204508 / S288c) GN=SSA4 PE=1 SV=3	SSA4 YER103W	P22202	5.02	642	69651.1	0	0	Cytoplasm.	ATP binding; ATPase activity; SRP-dependent cotranslational protein targeting to membrane, translocation; cytoplasm; nucleus; protein folding; response to stress; unfolded protein binding	0.00204856	0.000236861	0.00153338	0.000235295	1.33598	0.00178285	0.000162417	0.0016409	8.33655e-05	1.08651	0.0012915	0.000228704	0.00190308	0.000212265	0.678637	0.00132016	0.000158842	0.00107898	0.000152365	1.22353	0.000893713	9.30398e-05	0.00115969	0.000154413	0.770646	0.000822796	6.6539e-05	0.00103468	0.000164983	0.79522
Cluster of Pyruvate decarboxylase isozyme 1 OS=Saccharomyces cerevisiae (strain ATCC 204508 / S288c) GN=PDC1 PE=1 SV=7 (PDC1_YEAST)	PDC1 YLR044C L2104	P06169	5.8	563	61364.2	4	Fermentation; ethanol fermentation. Amino-acid degradation; Ehrlich pathway.	Cytoplasm. Nucleus.	L-phenylalanine catabolic process; aromatic amino acid family catabolic process to alcohol via Ehrlich pathway; branched-chain amino acid catabolic process; cytosol; glucose catabolic process to ethanol; magnesium ion binding; nucleus; pyruvate decarboxylase activity; pyruvate metabolic process; thiamine pyrophosphate binding; tryptophan catabolic process	0.0132823	0.000658611	0.00205244	0.000270332	6.47147	0.0102301	0.000251278	0.0120744	0.000177195	0.847252	0.0115129	0.00217495	0.011909	0.000882574	0.966738	0.00568233	0.00144638	0.00231975	0.000730577	2.44954	0.00515842	0.000264287	0.00190982	0.000382795	2.70101	0.00532395	0.00135254	0.00164923	0.000189307	3.22815
Pyruvate decarboxylase isozyme 3 OS=Saccharomyces cerevisiae (strain ATCC 204508 / S288c) GN=PDC6 PE=1 SV=3	PDC6 YGR087C	P26263	5.8	563	61580.4	4	Fermentation; ethanol fermentation. Amino-acid degradation; Ehrlich pathway.	Cytoplasm.	L-phenylalanine catabolic process; aromatic amino acid family catabolic process to alcohol via Ehrlich pathway; branched-chain amino acid catabolic process; cytoplasm; ethanol metabolic process; magnesium ion binding; pyruvate decarboxylase activity; thiamine pyrophosphate binding; tryptophan catabolic process	0.00181491	0.000277769	0.000139956	0.000136761	12.9677	0.00171573	0.000159635	0.0036294	0.00022384	0.472731	0.00226392	0.000322702	0.00352573	0.000702385	0.642115	---	---	---	---	---	---	---	---	---	---	---	---	---	---	---
Phosphoglycerate kinase OS=Saccharomyces cerevisiae (strain ATCC 204508 / S288c) GN=PGK1 PE=1 SV=2	PGK1 YCR012W YCR12W	P00560	7.09	416	44607.2	2	Carbohydrate degradation; glycolysis; pyruvate from D-glyceraldehyde 3-phosphate: step 2/5.	Cytoplasm.	ATP binding; gluconeogenesis; glycolysis; mitochondrion; phosphoglycerate kinase activity; plasma membrane	0.017565	0.00590657	0.00149415	0.000196667	11.7558	0.0201216	0.00212779	0.0102785	0.00103539	1.95765	0.0097384	0.00214793	0.012723	0.00126895	0.765416	0.00790684	0.00230865	0.00112748	0.000453035	7.01285	0.00468531	9.6722e-05	0.00134297	0.000256049	3.48877	0.00555786	0.00184022	0.000813436	0.000192048	6.83257
Enolase 2 OS=Saccharomyces cerevisiae (strain ATCC 204508 / S288c) GN=ENO2 PE=1 SV=2	ENO2 ENOB YHR174W	P00925	5.67	437	46783	4	Carbohydrate degradation; glycolysis; pyruvate from D-glyceraldehyde 3-phosphate: step 4/5.	Cytoplasm.	fungal-type vacuole; gluconeogenesis; glycolysis; internal side of plasma membrane; magnesium ion binding; mitochondrion; phosphopyruvate hydratase activity; phosphopyruvate hydratase complex; regulation of vacuole fusion, non-autophagic	0.0417989	0.00419989	0.00591196	0.000769355	7.07022	0.0306142	0.00109251	0.0184031	0.00257342	1.66353	0.015387	0.00206063	0.0233371	0.000962199	0.659336	0.0165736	0.00537029	0.00886035	0.00201678	1.87053	0.0137551	0.000691856	0.00600895	0.0011527	2.28911	0.0168513	0.0051818	0.00547216	0.000648625	3.07947
Fructose-bisphosphate aldolase OS=Saccharomyces cerevisiae (strain ATCC 204508 / S288c) GN=FBA1 PE=1 SV=3	FBA1 YKL060C YKL320	P14540	5.51	359	39489.6	4	Carbohydrate degradation; glycolysis; D-glyceraldehyde 3-phosphate and glycerone phosphate from D-glucose: step 4/4.	0	cytosol; fructose-bisphosphate aldolase activity; gluconeogenesis; glycolysis; mitochondrion; zinc ion binding	0.0184427	0.00287221	0.0020886	0.000535057	8.8302	0.0139957	0.00127027	0.0129427	0.00173205	1.08136	0.00755637	0.000395784	0.0100789	0.000637358	0.749723	0.00451588	0.00158557	0.00145588	0.000586997	3.10183	0.0039005	0.000334386	0.00119658	0.000160871	3.2597	0.00434363	0.00164981	0.000969195	0.000256133	4.48169
Elongation factor 2 OS=Saccharomyces cerevisiae (strain ATCC 204508 / S288c) GN=EFT1 PE=1 SV=1	EFT1 YOR133W O3317 YOR3317W; EFT2 YDR385W	P32324	5.92	842	93289.2	0	Protein biosynthesis; polypeptide chain elongation.	Cytoplasm.	GTP binding; GTP catabolic process; GTPase activity; positive regulation of translational elongation; rRNA binding; ribosome; translation elongation factor activity	0.00138141	0.000480048	0.000447588	4.95472e-05	3.08635	0.00282437	0.00022213	0.00262699	0.000225313	1.07514	0.00340895	0.000297493	0.00248844	7.87549e-05	1.36992	0.00111825	0.000180995	0.00096091	0.00014319	1.16374	0.00171796	7.57891e-05	0.000589437	8.53775e-05	2.91458	0.00195002	8.079e-05	0.000522503	6.95585e-05	3.73207
Elongation factor 3A OS=Saccharomyces cerevisiae (strain ATCC 204508 / S288c) GN=YEF3 PE=1 SV=4	YEF3 EFC1 TEF3 YEF3A YLR249W L9672.5	P16521	5.73	1044	115814	0	Protein biosynthesis; polypeptide chain elongation.	Cytoplasm.	ATP binding; ATPase activity; cytosolic ribosome; rRNA binding; translation elongation factor activity; translational termination	0.00178875	0.000203973	0.000143705	8.91654e-05	12.4474	0.00250888	1.82998e-06	0.00173716	5.55589e-05	1.44424	0.00267291	0.000497764	0.00208387	9.58173e-05	1.28267	0.000577951	0.000224882	3.52913e-05	3.97644e-05	16.3766	0.000493537	0.000116977	0	0	---	0.000367839	0.000190227	8.97803e-06	1.55504e-05	40.971
Suppressor protein STM1 OS=Saccharomyces cerevisiae (strain ATCC 204508 / S288c) GN=STM1 PE=1 SV=3	STM1 MPT4 STO1 YLR150W L9634.1	P39015	9.66	273	29863.8	0	0	Cytoplasm. Nucleus. Cytoplasm â€º perinuclear region.	TOR signaling cascade; cytosolic ribosome; negative regulation of apoptotic process; nucleus; perinuclear region of cytoplasm; polysome; regulation of translational initiation in response to stress; telomere maintenance; telomeric DNA binding; translational elongation; triplex DNA binding	0.0273593	0.00365272	0.0177144	0.00860139	1.54447	0.00768156	0.000967544	0.00754334	0.000364696	1.01832	0.00364849	0.000671289	0.0103951	0.000466401	0.350982	0.0118586	0.00204472	0.0045542	6.67894e-05	2.60388	0.00415946	4.54916e-05	0.00958629	0.000432435	0.433896	0.00477428	0.00122387	0.00879877	0.000731795	0.542608
Fatty acid synthase subunit alpha OS=Saccharomyces cerevisiae (strain ATCC 204508 / S288c) GN=FAS2 PE=1 SV=2	FAS2 YPL231W P1409	P19097	5.32	1887	206947	2	0	0	3-oxoacyl-[acyl-carrier-protein] reductase (NADPH) activity; 3-oxoacyl-[acyl-carrier-protein] synthase activity; fatty acid biosynthetic process; fatty acid synthase complex; fatty-acyl-CoA synthase activity; holo-[acyl-carrier-protein] synthase activity; macromolecule biosynthetic process; magnesium ion binding; mitochondrion	---	---	---	---	---	0.000646802	1.62268e-05	0.000513751	2.71564e-05	1.25898	0.000884418	0.000412678	0.000414847	3.21353e-05	2.13191	2.25295e-05	3.90223e-05	4.75932e-06	8.24339e-06	4.73377	3.73791e-05	3.68799e-05	5.08206e-06	8.80238e-06	7.35512	3.80118e-05	5.0177e-05	0	0	---
sp|P00330|ADH1_YEAST Alcohol dehydrogenase 1 OS=Saccharomyces cerevisiae (strain...	ADH1 ADC1 YOL086C O0947	P00330	6.21	348	36718	1	0	Cytoplasm.	NADH oxidation; alcohol dehydrogenase (NAD) activity; amino acid catabolic process to alcohol via Ehrlich pathway; cytoplasm; ethanol biosynthetic process involved in glucose fermentation to ethanol; methylglyoxal reductase (NADH-dependent) activity; plasma membrane; zinc ion binding	0.0252209	0.00256268	0.00166151	0.000325425	15.1795	0.00709265	0.000852117	0.00946658	0.000190699	0.74923	0.00680432	0.000699371	0.0122158	0.000653109	0.557012	0.0076364	0.00119415	0.00237806	0.000384203	3.21119	0.00556927	0.000235945	0.00186102	0.00032731	2.99258	0.00757537	0.00156507	0.00204499	0.000307439	3.70436
60S ribosomal protein L3 OS=Saccharomyces cerevisiae (strain ATCC 204508 / S288c) GN=RPL3 PE=1 SV=4	RPL3 MAK8 TCM1 YOR063W YOR29-14	P14126	10.29	387	43626.4	0	0	Cytoplasm.	cytoplasmic translation; cytosolic large ribosomal subunit; ribosomal large subunit assembly; structural constituent of ribosome	0.000236889	5.55835e-05	0	0	---	0.00344529	0.00107659	0.00328887	0.000256072	1.04756	0.00660304	0.00267505	0.00294857	0.000494865	2.2394	0.000264451	0.000229023	0	0	---	6.24104e-05	0.000108098	0	0	---	3.31606e-05	5.74359e-05	0	0	---
Elongation factor 1-beta OS=Saccharomyces cerevisiae (strain ATCC 204508 / S288c) GN=EFB1 PE=1 SV=4	EFB1 TEF5 YAL003W	P32471	4.3	206	22495.8	0	Protein biosynthesis; polypeptide chain elongation.	0	eukaryotic translation elongation factor 1 complex; guanyl-nucleotide exchange factor activity; translation elongation factor activity; translational elongation	0.00159408	0.000403817	0.0059435	0.00412484	0.268205	0.00487414	0.000893673	0.0179363	0.00300261	0.271747	0.00228472	0.000141238	0.0183061	0.00211875	0.124806	0.00180547	0.000288784	0.00429513	0.000401749	0.420352	0.00173951	0.000141366	0.00521663	0.00057966	0.333455	0.0016794	0.000520286	0.00486125	0.000874128	0.345466
Fatty acid synthase subunit beta OS=Saccharomyces cerevisiae (strain ATCC 204508 / S288c) GN=FAS1 PE=1 SV=2	FAS1 YKL182W	P07149	5.64	2051	228691	2	0	0	3-hydroxyacyl-[acyl-carrier-protein] dehydratase activity; 3-hydroxyoctanoyl-[acyl-carrier-protein] dehydratase activity; [acyl-carrier-protein] S-acetyltransferase activity; [acyl-carrier-protein] S-malonyltransferase activity; enoyl-[acyl-carrier-protein] reductase (NADH) activity; enoyl-[acyl-carrier-protein] reductase (NADPH, B-specific) activity; fatty acid biosynthetic process; fatty acid s…	2.62817e-05	3.08291e-05	0	0	---	1.23382e-05	2.13705e-05	4.7734e-06	8.26778e-06	2.58479	0.000858109	0.000321968	0.000434704	0.000108782	1.97401	---	---	---	---	---	---	---	---	---	---	---	---	---	---	---
Elongation factor 1-alpha OS=Saccharomyces cerevisiae (strain ATCC 204508 / S288c) GN=TEF1 PE=1 SV=1	TEF1 YPR080W P9513.7; TEF2 YBR118W YBR0913	P02994	9.14	458	50032.7	0	Protein biosynthesis; polypeptide chain elongation.	Cytoplasm. Cytoplasm â€º cytoskeleton.	GDP binding; GTP binding; GTP catabolic process; GTPase activity; cytoskeleton; eukaryotic translation elongation factor 1 complex; mitochondrion; ribosome; tRNA export from nucleus; translation elongation factor activity	0.00182399	0.000904206	0.000665141	0.000211941	2.74227	0.0028595	0.000125523	0.00235998	0.000334039	1.21166	0.00464283	0.00103857	0.0026151	5.55617e-05	1.77539	0.00210211	0.000154156	0.00144928	0.000129793	1.45044	0.00216355	0.000165777	0.00114097	6.49762e-05	1.89624	0.00257266	0.000196633	0.00100418	0.000222178	2.56196
Triosephosphate isomerase OS=Saccharomyces cerevisiae (strain ATCC 204508 / S288c) GN=TPI1 PE=1 SV=2	TPI1 YDR050C YD9609.05C	P00942	5.75	248	26664.3	5	Carbohydrate biosynthesis; gluconeogenesis. Carbohydrate degradation; glycolysis; D-glyceraldehyde 3-phosphate from glycerone phosphate: step 1/1.	0	gluconeogenesis; glycolysis; mitochondrion; pentose-phosphate shunt; plasma membrane; triose-phosphate isomerase activity	0.013985	0.00200213	0.00211009	0.000953942	6.62769	0.00989659	0.000375967	0.00547166	0.000501204	1.8087	0.00612626	0.00115819	0.0071657	0.000569488	0.854942	0.00909004	0.00207453	0.00233872	7.19854e-05	3.88677	0.0068948	0.000332334	0.00236101	0.000301009	2.92028	0.00788899	0.00145252	0.0016641	9.29358e-05	4.74068
Protein ZEO1 OS=Saccharomyces cerevisiae (strain ATCC 204508 / S288c) GN=ZEO1 PE=1 SV=3	ZEO1 YOL109W O0738	Q08245	5.43	113	12457.8	0	0	Cell membrane; Peripheral membrane protein.	extrinsic to plasma membrane; fungal-type cell wall organization; mitochondrial outer membrane	0.00379449	0.00140782	0.026196	0.00598191	0.14485	0.00618969	0.00103503	0.012715	0.0016585	0.486804	0.00654463	0.000652101	0.0187461	0.000553647	0.34912	0.00976561	0.00162171	0.0318962	0.00314717	0.306169	0.0079373	0.00034776	0.0302453	0.00438931	0.262431	0.00681275	0.000951252	0.0318664	0.00116446	0.213791
Isoleucine--tRNA ligase, cytoplasmic OS=Saccharomyces cerevisiae (strain ATCC 204508 / S288c) GN=ILS1 PE=1 SV=1	ILS1 YBL076C YBL0734	P09436	5.74	1072	122984	6	0	Cytoplasm.	ATP binding; aminoacyl-tRNA editing activity; cytosol; isoleucine-tRNA ligase activity; isoleucyl-tRNA aminoacylation; regulation of translational fidelity	0.00061293	0.000100153	0	0	---	0.000758117	0.000190968	0.000751872	0.000108213	1.00831	0.0010921	0.00019613	0.000691765	9.16473e-05	1.57871	0.00017085	6.9688e-05	3.36138e-05	3.83578e-05	5.08272	1.12653e-05	1.95121e-05	2.56658e-05	1.05152e-06	0.438922	5.81837e-05	5.43861e-05	1.7494e-05	1.51582e-05	3.32592
Polyadenylate-binding protein, cytoplasmic and nuclear OS=Saccharomyces cerevisiae (strain ATCC 204508 / S288c) GN=PAB1 PE=1 SV=4	PAB1 YER165W	P04147	5.71	577	64213	0	0	Cytoplasm. Nucleus.	cytoplasmic stress granule; mRNA processing; mRNA transport; nucleotide binding; nucleus; poly(A) RNA binding; regulation of nuclear-transcribed mRNA poly(A) tail shortening; regulation of translational initiation; ribosome	0.000114101	4.0963e-05	0.000510154	0.000135539	0.223661	0.00103666	0.000384709	0.00134852	0.000138228	0.768737	0.0023908	0.00121815	0.0017054	0.000181835	1.4019	0.000975249	0.00038101	0.00172016	0.000208843	0.566953	0.00291997	0.000238397	0.00103907	0.00028217	2.81017	0.00267662	5.07319e-05	0.00095746	9.84983e-05	2.79555
Heat shock protein STI1 OS=Saccharomyces cerevisiae (strain ATCC 204508 / S288c) GN=STI1 PE=1 SV=1	STI1 YOR027W OR26.17	P15705	5.45	589	66265.1	0	0	Cytoplasm.	ATPase inhibitor activity; Hsp70 protein binding; Hsp90 protein binding; cytoplasm; mRNA binding; protein folding; response to stress	0.000305529	0.000296572	0.000878583	0.000223418	0.347752	0.0018358	0.000177038	0.00144859	0.000217829	1.2673	0.000851756	0.000252739	0.00207026	0.00011325	0.411426	0.00130854	0.000288136	0.0016365	0.000248529	0.7996	0.00113653	8.73687e-05	0.00133761	0.000246366	0.849671	0.00119061	0.000170916	0.00145003	0.000233847	0.821093
12 kDa heat shock protein OS=Saccharomyces cerevisiae (strain ATCC 204508 / S288c) GN=HSP12 PE=1 SV=1	HSP12 GLP1 HOR5 YFL014W	P22943	5.22	109	11692.7	0	0	0	cell adhesion; cellular response to heat; cellular response to osmotic stress; cellular response to oxidative stress; cytosol; endosome; lipid binding; nucleus; plasma membrane; plasma membrane organization	0.00171098	0.00148377	0.0378635	0.0140803	0.0451882	0.00932804	0.00101271	0.0145441	0.00197483	0.641364	0.00640471	0.00205271	0.0179305	0.0018111	0.357197	0.00524979	0.00101294	0.017286	0.00194341	0.303702	0.00482464	0.000475758	0.0158114	0.000597694	0.305136	0.00369778	0.000783853	0.0170278	0.000897557	0.217162
Acetyl-CoA carboxylase OS=Saccharomyces cerevisiae (strain ATCC 204508 / S288c) GN=ACC1 PE=1 SV=2	ACC1 ABP2 FAS3 MTR7 YNR016C N3175	Q00955	5.89	2233	250222	6	Lipid metabolism; malonyl-CoA biosynthesis; malonyl-CoA from acetyl-CoA: step 1/1.	Cytoplasm. Endoplasmic reticulum membrane; Peripheral membrane protein; Cytoplasmic side.	ATP binding; acetyl-CoA carboxylase activity; biotin carboxylase activity; endoplasmic reticulum membrane; long-chain fatty acid biosynthetic process; malonyl-CoA biosynthetic process; metal ion binding; mitochondrion; nuclear envelope organization; protein import into nucleus	---	---	---	---	---	0.000142255	1.86996e-05	0.000106555	1.67567e-05	1.33504	0.000176427	6.02019e-05	5.96227e-05	1.83215e-05	2.95907	2.47551e-05	2.93076e-05	2.06862e-05	7.37936e-06	1.1967	5.19275e-06	8.9941e-06	3.96914e-06	6.87476e-06	1.30828	0	0	8.47493e-06	7.34048e-06	0
Magnesium-activated aldehyde dehydrogenase, cytosolic OS=Saccharomyces cerevisiae (strain ATCC 204508 / S288c) GN=ALD6 PE=1 SV=4	ALD6 ALDH1 YPL061W LPE9	P54115	5.31	500	54283	1	Alcohol metabolism; ethanol degradation; acetate from ethanol: step 2/2.	Cytoplasm.	NADPH regeneration; acetate biosynthetic process; aldehyde dehydrogenase (NAD) activity; aldehyde dehydrogenase [NAD(P)+] activity; cytosol; ethanol catabolic process; mitochondrion; response to salt stress	0.00426513	0.000914208	0.000139251	0.000155924	30.6291	0.00277141	0.000384444	0.00187816	0.000122844	1.4756	0.0029979	0.000109636	0.00225475	0.00012204	1.32959	0.00333879	0.000863931	0.000146199	0.000156843	22.8373	0.00220261	0.000355287	7.20913e-05	8.31763e-05	30.5531	0.00283955	0.000854524	0.000131223	0.000227285	21.6391
Guanine nucleotide-binding protein subunit beta-like protein OS=Saccharomyces cerevisiae (strain ATCC 204508 / S288c) GN=ASC1 PE=1 SV=4	ASC1 CPC2 YMR116C YM9718.15C	P38011	5.8	319	34674.1	0	0	Cytoplasm.	G-protein coupled receptor signaling pathway; GDP-dissociation inhibitor activity; cytosolic small ribosomal subunit; glucose mediated signaling pathway; invasive growth in response to glucose limitation; negative regulation of translation; signal transducer activity	0.01035	0.000475687	8.5044e-05	8.74664e-05	121.702	0.00550014	0.000186564	0.00557664	0.000677298	0.986283	0.0037225	0.000956628	0.00521927	0.00089029	0.713223	0.00343429	0.00199262	0	0	---	0.00175952	0.000132833	2.84039e-05	4.9197e-05	61.9463	0.00267119	0.00230953	0	0	---
40S ribosomal protein S3 OS=Saccharomyces cerevisiae (strain ATCC 204508 / S288c) GN=RPS3 PE=1 SV=5	RPS3 SUF14 YNL178W N1653	P05750	9.42	240	26371.6	0	0	Cytoplasm.	90S preribosome; DNA-(apurinic or apyrimidinic site) lyase activity; RNA binding; cytoplasmic translation; cytosolic small ribosomal subunit; preribosome, small subunit precursor; rRNA export from nucleus; ribosomal small subunit export from nucleus; structural constituent of ribosome	0.000482468	0.000547269	7.43264e-05	6.45359e-05	6.49121	0.00641028	0.000709463	0.0060866	0.000466985	1.05318	0.00695853	0.000858917	0.00412662	0.000860503	1.68625	0.000940963	0.000263808	0.000267769	6.00643e-05	3.51408	0.000345883	0.000305681	0.000229282	9.39354e-06	1.50855	0.000567123	0.000203482	0.000272731	6.26965e-05	2.07942
Heat shock protein SSC1, mitochondrial OS=Saccharomyces cerevisiae (strain ATCC 204508 / S288c) GN=SSC1 PE=1 SV=1	SSC1 ENS1 YJR045C J1639	P0CS90	5.24	654	68095.8	0	0	Mitochondrion matrix. Nucleus.	ATP binding; ATPase activity; TRC complex; enzyme regulator activity; mitochondrial nucleoid; nucleus; positive regulation of endodeoxyribonuclease activity; presequence translocase-associated import motor; protein import into mitochondrial matrix; protein refolding; protein unfolding; response to stress	0.000978991	0.000270958	0.000394772	0.000135515	2.47989	0.00192563	0.000188941	0.00127547	0.00035696	1.50974	0.00312441	0.00200783	0.00148777	0.000127129	2.10006	0.000674971	0.000205534	0.000793874	0.000269255	0.850224	0.000400317	0.000127659	0.000827039	5.0753e-05	0.484036	0.000454276	0.000169888	0.000989414	0.00011781	0.459137
6-phosphofructokinase subunit alpha OS=Saccharomyces cerevisiae (strain ATCC 204508 / S288c) GN=PFK1 PE=1 SV=1	PFK1 YGR240C G8599	P16861	5.98	987	107970	2	Carbohydrate degradation; glycolysis; D-glyceraldehyde 3-phosphate and glycerone phosphate from D-glucose: step 3/4.	Cytoplasm.	6-phosphofructokinase activity; 6-phosphofructokinase complex; ATP binding; fructose 6-phosphate metabolic process; glycolysis; metal ion binding; mitochondrion; proton transport	0.000120064	7.89417e-05	9.29056e-06	1.60917e-05	12.9232	0.00105633	5.73626e-05	0.000758605	9.217e-05	1.39246	0.00126258	0.00025896	0.000769623	0.00015245	1.64052	0.000122322	7.2797e-05	0	0	---	0.000108928	3.64053e-05	0	0	---	0.000164815	0.000128866	9.49652e-06	1.64485e-05	17.3553
Phosphoglycerate mutase 1 OS=Saccharomyces cerevisiae (strain ATCC 204508 / S288c) GN=GPM1 PE=1 SV=3	GPM1 GPM YKL152C YKL607	P00950	8.86	247	27477.4	5	Carbohydrate degradation; glycolysis; pyruvate from D-glyceraldehyde 3-phosphate: step 3/5.	0	cytosol; gluconeogenesis; glycolysis; mitochondrial intermembrane space; phosphoglycerate mutase activity	0.00995615	0.00208153	0.0029974	0.000630272	3.32159	0.00344808	0.000484282	0.00587701	0.000311073	0.586706	0.00528949	0.000892315	0.00438932	3.38734e-05	1.20508	0.00816386	0.00361238	0.00208949	0.000111343	3.90711	0.00419793	0.000760678	0.00208162	0.000567215	2.01666	0.00493899	0.000987355	0.00216079	0.000269224	2.28573
40S ribosomal protein S2 OS=Saccharomyces cerevisiae (strain ATCC 204508 / S288c) GN=RPS2 PE=1 SV=3	RPS2 RPS4 SUP38 SUP44 YGL123W G2893	P25443	10.44	254	27318.6	0	0	Cytoplasm. Nucleus â€º nucleolus.	SSU rRNA binding; cytosolic small ribosomal subunit; nucleolus; positive regulation of translational fidelity; rRNA export from nucleus; rRNA processing; small-subunit processome; structural constituent of ribosome; translation	0.000360205	7.94284e-05	0	0	---	0.00380508	0.000116922	0.00287363	0.000287578	1.32414	0.00519093	0.00200063	0.00294976	0.000560094	1.75978	---	---	---	---	---	---	---	---	---	---	---	---	---	---	---
40S ribosomal protein S4-A OS=Saccharomyces cerevisiae (strain ATCC 204508 / S288c) GN=RPS4A PE=1 SV=1	RPS4A RPS7B YJR145C J2186	P0CX35	10.09	261	29279	0	0	Cytoplasm.	90S preribosome; cytoplasmic translation; cytosolic small ribosomal subunit; rRNA binding; structural constituent of ribosome	---	---	---	---	---	0.00501241	0.0010428	0.00462982	0.00051064	1.08264	0.00605963	0.00153754	0.0036688	0.000766661	1.65166	0.000642259	0.000439785	0	0	---	0.000365654	7.40446e-05	0	0	---	0.000416698	0.000233139	0	0	---
Protein URA2 OS=Saccharomyces cerevisiae (strain ATCC 204508 / S288c) GN=URA2 PE=1 SV=5	URA2 YJL130C J0686	P07259	5.57	2214	245041	6	Pyrimidine metabolism; UMP biosynthesis via de novo pathway; (S)-dihydroorotate from bicarbonate: step 1/3. Pyrimidine metabolism; UMP biosynthesis via de novo pathway; (S)-dihydroorotate from bicarbonate: step 2/3.	Cytoplasm.	'de novo' UMP biosynthetic process; 'de novo' pyrimidine nucleobase biosynthetic process; ATP binding; amino acid binding; aspartate carbamoyltransferase activity; carbamoyl phosphate biosynthetic process; carbamoyl-phosphate synthase (glutamine-hydrolyzing) activity; glutamine catabolic process; glutamine metabolic process; integral to membrane; metal ion binding; mitochondrion; negative regulat…	---	---	---	---	---	0.000166434	4.90492e-05	8.53014e-05	2.79275e-05	1.95113	0.000227992	8.28692e-05	6.92446e-05	2.47656e-05	3.29257	1.15814e-05	2.00596e-05	1.2435e-05	1.21779e-05	0.931354	0	0	0	0	---	1.66767e-05	1.63321e-05	4.31411e-06	7.47226e-06	3.86561
Cluster of Ubiquitin-40S ribosomal protein S31 OS=Saccharomyces cerevisiae (strain ATCC 204508 / S288c) GN=RPS31 PE=1 SV=3 (RS27A_YEAST)	RPS31 RPS37 UBI3 YLR167W L9470.14	P05759	6.56	152	8556.78	0	0	Cytoplasm. Nucleus. Cytoplasm.	DNA repair; cytoplasmic translation; cytosolic small ribosomal subunit; maturation of SSU-rRNA from tricistronic rRNA transcript (SSU-rRNA, LSU-rRNA,5S); metal ion binding; nucleus; protein tag; ribosomal small subunit assembly; structural constituent of ribosome	0.00153734	0.000643181	0.00219414	0.000323488	0.70066	0.00342887	0.000757414	0.0125265	0.00259227	0.27373	0.00159188	2.97895e-05	0.0112664	0.000931819	0.141294	0.00112133	0.000244451	0.00727395	0.000850535	0.154157	0.00102459	0.000157342	0.0111505	0.00116841	0.0918873	0.00104733	0.000117338	0.0117695	0.00111984	0.0889868
Ubiquitin-60S ribosomal protein L40 OS=Saccharomyces cerevisiae (strain ATCC 204508 / S288c) GN=RPL40A PE=1 SV=1	RPL40A UBI1 YIL148W	P0CH08	6.56	128	8556.78	0	0	Cytoplasm. Nucleus. Cytoplasm.	DNA repair; cytoplasmic translation; cytosolic large ribosomal subunit; nucleus; protein tag; protein ubiquitination; ribosome biogenesis; structural constituent of ribosome	0.00111081	0.000751072	0.00260554	0.000384142	0.426328	0.00327935	0.00079343	0.0147261	0.0031446	0.22269	0.00117397	9.18982e-05	0.0132953	0.00103938	0.0882993	0.00133157	0.000290286	0.00863781	0.00101001	0.154157	0.0012167	0.000186844	0.0132413	0.00138748	0.0918873	0.00134397	0.000193288	0.0140509	0.00120944	0.0956497
Leucine--tRNA ligase, cytoplasmic OS=Saccharomyces cerevisiae (strain ATCC 204508 / S288c) GN=CDC60 PE=1 SV=1	CDC60 YPL160W P2564	P26637	5.61	1090	124142	6	0	Cytoplasm.	ATP binding; aminoacyl-tRNA editing activity; cytoplasm; leucine-tRNA ligase activity; leucyl-tRNA aminoacylation; regulation of TOR signaling cascade; regulation of translational fidelity	0.000450408	0.000271117	7.35417e-05	4.1685e-05	6.12453	0.000875242	7.63249e-05	0.00103733	8.51873e-05	0.843745	0.000474132	0.000278235	0.000846921	0.000131978	0.55983	0.000198002	0.000121461	8.44194e-05	1.37871e-05	2.34546	9.83164e-05	3.06667e-05	4.9332e-05	4.27305e-05	1.99295	0.000171143	9.78089e-05	6.88137e-05	1.49815e-05	2.48705
Actin OS=Saccharomyces cerevisiae (strain ATCC 204508 / S288c) GN=ACT1 PE=1 SV=1	ACT1 ABY1 END7 YFL039C	P60010	5.44	375	41689.6	0	0	Cytoplasm â€º cytoskeleton.	ATP binding; DNA repair; Ino80 complex; NuA4 histone acetyltransferase complex; Swr1 complex; actin cortical patch; actin filament; actin filament bundle; actomyosin contractile ring contraction; ascospore wall assembly; budding cell isotropic bud growth; cellular bud neck contractile ring; cellular response to oxidative stress; chronological cell aging; endocytosis; establishment of mitotic spin…	0.000947708	0.000142172	0.000284124	0.000131066	3.33555	0.00179544	0.000314637	0.00230792	0.000274893	0.77795	0.00244594	0.000566708	0.00311957	0.00026026	0.784063	0.000871381	0.000283711	0.000540226	3.96429e-05	1.61299	0.000893371	6.6771e-05	0.0002187	6.84514e-05	4.08492	0.00082887	0.000448958	0.000350028	4.39376e-05	2.36801
Glyceraldehyde-3-phosphate dehydrogenase 2 OS=Saccharomyces cerevisiae (strain ATCC 204508 / S288c) GN=TDH2 PE=1 SV=3	TDH2 GPD2 YJR009C J1433	P00358	6.49	332	35715.7	1	Carbohydrate degradation; glycolysis; pyruvate from D-glyceraldehyde 3-phosphate: step 1/5.	Cytoplasm.	NAD binding; NADP binding; apoptotic process; fungal-type cell wall; gluconeogenesis; glyceraldehyde-3-phosphate dehydrogenase (NAD+) (phosphorylating) activity; glycolysis; lipid particle; mitochondrion; plasma membrane; reactive oxygen species metabolic process	0.0491664	0.00349189	0.00445005	0.000668694	11.0485	0.0185331	0.000627959	0.0171535	0.000707193	1.08043	0.0213964	0.00013958	0.0142298	0.000475256	1.50363	0.0223742	0.00518296	0.00358614	0.0015643	6.23907	0.0142191	0.000592174	0.00346632	0.00066398	4.10207	0.0186222	0.00768262	0.0029348	0.000152327	6.3453
Ketol-acid reductoisomerase, mitochondrial OS=Saccharomyces cerevisiae (strain ATCC 204508 / S288c) GN=ILV5 PE=1 SV=1	ILV5 YLR355C L9638.7	P06168	6.31	395	39177.2	1	Amino-acid biosynthesis; L-isoleucine biosynthesis; L-isoleucine from 2-oxobutanoate: step 2/4. Amino-acid biosynthesis; L-valine biosynthesis; L-valine from pyruvate: step 2/4.	Mitochondrion.	branched-chain amino acid biosynthetic process; coenzyme binding; double-stranded DNA binding; isoleucine biosynthetic process; ketol-acid reductoisomerase activity; metal ion binding; mitochondrial genome maintenance; mitochondrial nucleoid; valine biosynthetic process	0.000790503	0.000237061	2.16396e-05	3.74809e-05	36.5304	0.00395987	0.000265076	0.00238378	0.00035825	1.66117	0.00372633	0.000558628	0.00226541	0.000414965	1.64488	0.000140086	0.000165626	0	0	---	0.000215367	0.000192563	0	0	---	0.000190395	0.000195093	0	0	---
V-type proton ATPase catalytic subunit A OS=Saccharomyces cerevisiae (strain ATCC 204508 / S288c) GN=VMA1 PE=1 SV=3	VMA1 CLS8 TFP1 YDL185W D1286	P17255	5.24	1071	30703	3	0	Endomembrane system. Vacuole membrane.	ATP binding; ATP hydrolysis coupled proton transport; DNA binding; cellular protein metabolic process; endodeoxyribonuclease activity; endomembrane system; fungal-type vacuole membrane; intein-mediated protein splicing; intron homing; proton-transporting ATPase activity, rotational mechanism; vacuolar acidification; vacuolar proton-transporting V-type ATPase, V1 domain	0.000759136	3.16385e-05	0	0	---	0.000771411	0.0001319	0.000744002	5.38445e-05	1.03684	0.000882602	0.000196	0.000604224	0.000102595	1.46072	0.00087327	0.000270639	4.2444e-05	7.35152e-05	20.5746	0.000513001	9.94037e-05	8.9541e-06	1.5509e-05	57.2923	0.000450441	0.00020601	8.75169e-06	1.51584e-05	51.4691
Tropomyosin-1 OS=Saccharomyces cerevisiae (strain ATCC 204508 / S288c) GN=TPM1 PE=1 SV=1	TPM1 YNL079C N2332	P17536	4.58	199	23540.7	0	0	Cytoplasm â€º cytoskeleton.	actin filament bundle; actin filament bundle assembly; actin lateral binding; actin polymerization or depolymerization; budding cell apical bud growth; budding cell isotropic bud growth; cellular bud neck contractile ring; establishment of cell polarity; exocytosis; intracellular mRNA localization; mitochondrion inheritance; pseudohyphal growth; vacuole inheritance	0.00281944	0.00059558	0.0234108	0.00676532	0.120433	0.00121477	0.000585472	0.00673355	0.000304885	0.180405	0.00155446	0.000452884	0.00927056	0.000543915	0.167677	0.00210632	0.00071932	0.0131711	0.00154059	0.15992	0.00204653	0.000309914	0.0131537	0.000542194	0.155586	0.00184547	0.000121884	0.0142196	0.00114067	0.129783
Valine--tRNA ligase, mitochondrial OS=Saccharomyces cerevisiae (strain ATCC 204508 / S288c) GN=VAS1 PE=1 SV=2	VAS1 YGR094W	P07806	5.95	1104	119995	6	0	Cytoplasm. Mitochondrion.	ATP binding; aminoacyl-tRNA editing activity; mitochondrion; regulation of translational fidelity; valine-tRNA ligase activity; valyl-tRNA aminoacylation	0.000153817	7.97243e-05	2.45734e-05	2.52734e-05	6.25948	0.000714177	0.000121672	0.000498024	0.000124711	1.43402	0.000461944	9.94975e-05	0.000553822	6.56528e-05	0.834101	0.000131059	0.000104854	1.68029e-05	1.45737e-05	7.7998	2.19987e-05	1.90523e-05	0	0	---	5.57829e-05	2.01127e-05	6.79343e-05	2.94141e-05	0.82113
Eukaryotic initiation factor 4F subunit p150 OS=Saccharomyces cerevisiae (strain ATCC 204508 / S288c) GN=TIF4631 PE=1 SV=2	TIF4631 YGR162W	P39935	5.8	952	107101	0	0	Cytoplasm.	DNA binding; RNA metabolic process; cytoplasmic stress granule; eukaryotic translation initiation factor 4F complex; mitochondrion; regulation of translation; ribosomal large subunit biogenesis; ribosome; stress granule assembly; translation initiation factor activity	0	0	5.53057e-05	4.54128e-05	0	0.000280147	0.000104623	0.000288062	6.81239e-05	0.972523	0.000565177	0.000389844	0.000425536	8.32475e-05	1.32815	0.000180512	2.06158e-05	0.000290356	9.85908e-06	0.621693	0.000302034	4.36496e-05	0.000367167	5.80307e-05	0.822608	0.000294115	7.96123e-05	0.000305856	7.87058e-05	0.961611
Hexokinase-2 OS=Saccharomyces cerevisiae (strain ATCC 204508 / S288c) GN=HXK2 PE=1 SV=4	HXK2 HEX1 HKB YGL253W NRB486	P04807	5.16	486	53811.3	2	Carbohydrate metabolism; hexose metabolism.	0	ATP binding; cytosol; fructose import; fructose metabolic process; glucose import; glycolysis; hexokinase activity; mannose metabolic process; mitochondrion; nucleus; regulation of cell size; regulation of transcription by glucose; replicative cell aging	0.00304048	0.00120697	3.82333e-05	6.62221e-05	79.5244	0.00285216	0.000397619	0.00261512	0.000175654	1.09064	0.00232979	0.000330983	0.0025989	0.000216033	0.896453	0.00154202	0.000488702	5.61205e-05	9.72035e-05	27.4769	0.000959805	2.5944e-05	0	0	---	0.00114598	0.000498458	0	0	---
Nuclear segregation protein BFR1 OS=Saccharomyces cerevisiae (strain ATCC 204508 / S288c) GN=BFR1 PE=1 SV=1	BFR1 YOR198C	P38934	9.18	470	54639.3	0	0	0	RNA binding; mRNA metabolic process; meiosis; nuclear outer membrane-endoplasmic reticulum membrane network; polysome; regulation of mitosis	0.000719478	0.000362849	0.000244881	0.000131985	2.93807	0.00219143	0.000163363	0.000788637	6.826e-05	2.77876	0.00145869	0.000504416	0.00116436	0.000230894	1.25278	0.000353904	0.000309351	0.000959402	0.000196657	0.36888	0.000559652	0.000160488	0.00128324	0.000126002	0.436124	0.000464708	0.00019398	0.00115846	0.000144695	0.401141
Cluster of Transposon Ty1-BR Gag-Pol polyprotein OS=Saccharomyces cerevisiae (strain ATCC 204508 / S288c) GN=TY1B-BR PE=1 SV=1 (YB12B_YEAST)	TY1B-BR YBRWTy1-2 POL YBR012W-B YBR0207	Q12193	8.6	1756	198869	3	0	Cytoplasm. Nucleus.	ATP binding; DNA binding; DNA integration; DNA recombination; DNA-directed DNA polymerase activity; RNA binding; RNA-directed DNA polymerase activity; aspartic-type endopeptidase activity; cytoplasm; metal ion binding; peptidase activity; proteolysis; retrotransposon nucleocapsid; ribonuclease H activity; ribonuclease activity; transposition, RNA-mediated; viral procapsid maturation	---	---	---	---	---	0.000101311	1.18045e-05	3.21786e-05	1.54473e-05	3.14838	0.000358765	0.000141216	5.2061e-05	2.73454e-05	6.89125	---	---	---	---	---	---	---	---	---	---	---	---	---	---	---
Transposon Ty1-OL Gag-Pol polyprotein OS=Saccharomyces cerevisiae (strain ATCC 204508 / S288c) GN=TY1B-OL PE=2 SV=1	TY1B-OL YOLWTy1-1 POL YOL103W-B O0770	Q12273	8.22	1755	198614	3	0	Cytoplasm. Nucleus.	ATP binding; DNA binding; DNA integration; DNA recombination; DNA-directed DNA polymerase activity; RNA binding; RNA-directed DNA polymerase activity; aspartic-type endopeptidase activity; cytoplasm; metal ion binding; peptidase activity; proteolysis; retrotransposon nucleocapsid; ribonuclease H activity; ribonuclease activity; transposition, RNA-mediated; viral procapsid maturation	0	0	9.1981e-05	1.22912e-05	0	---	---	---	---	---	0.000339667	0.000138935	4.65118e-05	1.76988e-05	7.30282	---	---	---	---	---	---	---	---	---	---	---	---	---	---	---
Transposon Ty1-LR1 Gag-Pol polyprotein OS=Saccharomyces cerevisiae (strain ATCC 204508 / S288c) GN=TY1B-LR1 PE=1 SV=1	TY1B-LR1 YLRCTy1-1 POL YLR035C-A L1807	Q12088	8.68	1755	198462	3	0	Cytoplasm. Nucleus.	ATP binding; DNA binding; DNA integration; DNA recombination; DNA-directed DNA polymerase activity; RNA binding; RNA-directed DNA polymerase activity; aspartic-type endopeptidase activity; cytoplasm; metal ion binding; nucleic acid phosphodiester bond hydrolysis; proteolysis; retrotransposon nucleocapsid; ribonuclease H activity; transposition, RNA-mediated; viral procapsid maturation	---	---	---	---	---	---	---	---	---	---	0.000322838	9.40065e-05	2.87448e-05	2.58844e-05	11.2312	---	---	---	---	---	---	---	---	---	---	---	---	---	---	---
Transposon Ty1-DR3 Gag-Pol polyprotein OS=Saccharomyces cerevisiae (strain ATCC 204508 / S288c) GN=TY1B-DR3 PE=1 SV=2	TY1B-DR3 YDRCTy1-2 POL YDR210C-D YD8142B.01	Q99231	8.53	1755	198839	3	0	Cytoplasm. Nucleus.	ATP binding; DNA binding; DNA integration; DNA recombination; DNA-directed DNA polymerase activity; RNA binding; RNA-directed DNA polymerase activity; aspartic-type endopeptidase activity; cytoplasm; metal ion binding; peptidase activity; proteolysis; retrotransposon nucleocapsid; ribonuclease H activity; ribonuclease activity; transposition, RNA-mediated; viral procapsid maturation	---	---	---	---	---	---	---	---	---	---	0.000310465	0.000104673	4.65118e-05	1.76988e-05	6.67497	---	---	---	---	---	---	---	---	---	---	---	---	---	---	---
Transposon Ty1-NL2 Gag-Pol polyprotein OS=Saccharomyces cerevisiae (strain ATCC 204508 / S288c) GN=TY1B-NL2 PE=2 SV=1	TY1B-NL2 YNLWTy1-2 POL YNL054W-B N2453	Q99337	8.68	1749	198198	3	0	Cytoplasm. Nucleus.	ATP binding; DNA binding; DNA integration; DNA recombination; DNA-directed DNA polymerase activity; RNA binding; RNA-directed DNA polymerase activity; aspartic-type endopeptidase activity; cytoplasm; metal ion binding; peptidase activity; proteolysis; retrotransposon nucleocapsid; ribonuclease H activity; ribonuclease activity; transposition, RNA-mediated; viral procapsid maturation	---	---	---	---	---	8.72415e-05	6.84483e-07	2.7069e-05	1.85449e-05	3.22293	0.000299115	0.000115752	2.84167e-05	3.47617e-05	10.526	---	---	---	---	---	---	---	---	---	---	---	---	---	---	---
Nascent polypeptide-associated complex subunit alpha OS=Saccharomyces cerevisiae (strain ATCC 204508 / S288c) GN=EGD2 PE=1 SV=3	EGD2 YHR193C	P38879	4.84	174	18577.8	0	0	Cytoplasm. Nucleus.	'de novo' cotranslational protein folding; nascent polypeptide-associated complex; nucleus; phosphatidic acid binding; phosphatidylinositol-3,5-bisphosphate binding; phosphatidylinositol-3-phosphate binding; phosphatidylinositol-4-phosphate binding; protein transport; unfolded protein binding	0.00477561	0.00130154	0.0120216	0.00231612	0.397253	0.00745371	0.000654383	0.00545115	0.000356938	1.36737	0.00414188	0.000570238	0.00796541	0.00077059	0.519983	0.0060657	0.00231225	0.00862949	0.000303053	0.702904	0.00590816	0.000253762	0.0102302	0.000600907	0.577519	0.00547772	0.000794671	0.00926569	0.000652818	0.591184
60S ribosomal protein L19-A OS=Saccharomyces cerevisiae (strain ATCC 204508 / S288c) GN=RPL19A PE=1 SV=1	RPL19A RPL23A YL14A YBR084C-A YBR084BC	P0CX82	11.35	189	21572.9	0	0	Cytoplasm.	cytoplasmic translation; cytosolic large ribosomal subunit; structural constituent of ribosome	0.00245683	0.00242437	0.000907931	0.000476288	2.70596	0.0050441	0.000510221	0.00346325	0.000212818	1.45646	0.00608594	0.00225863	0.00354251	0.000750364	1.71798	0.00257749	0.000303804	0.000244403	8.71858e-05	10.546	0.00176931	0.000193306	0.000382142	0.000209657	4.62998	0.00180788	0.000346805	9.73774e-05	0.000168663	18.5657
Transketolase 1 OS=Saccharomyces cerevisiae (strain ATCC 204508 / S288c) GN=TKL1 PE=1 SV=4	TKL1 YPR074C YP9499.29C	P23254	6.5	680	73674.4	2	0	0	cytoplasm; metal ion binding; pentose-phosphate shunt; transketolase activity	0.00268612	0.000522028	1.36628e-05	2.36646e-05	196.601	0.000655086	0.000145644	0.00173477	0.000197188	0.377622	0.00084233	0.00020101	0.00195668	7.1492e-05	0.43049	0.0022251	0.000506738	0.000283683	3.19299e-05	7.84361	0.00147769	7.3235e-05	0.000416674	0.000123995	3.54639	0.00176423	0.000670826	0.000399581	1.80077e-05	4.4152
Eukaryotic translation initiation factor 5A-1 OS=Saccharomyces cerevisiae (strain ATCC 204508 / S288c) GN=HYP2 PE=1 SV=3	HYP2 TIF51A YEL034W SYGP-ORF21	P23301	4.79	157	16983.1	0	0	Cytoplasm.	cytosolic ribosome; mitochondrion; peptidyl-lysine modification to hypusine; positive regulation of translational elongation; positive regulation of translational initiation; positive regulation of translational termination; ribosome binding; translation elongation factor activity; translation initiation factor activity; translational frameshifting	0.00284127	0.000147587	0.0109006	0.00314886	0.260653	0.00712033	0.00141967	0.00453387	0.000290796	1.57047	0.00923231	0.00452992	0.00621402	0.00135869	1.48572	0.00971068	0.0038862	0.00508871	0.000943662	1.90828	0.0118123	0.000691596	0.00367134	0.000570786	3.21744	0.0132648	0.0034425	0.00279985	0.00124633	4.73769
Glutamate synthase [NADH] OS=Saccharomyces cerevisiae (strain ATCC 204508 / S288c) GN=GLT1 PE=1 SV=2	GLT1 YDL171C	Q12680	6.36	2145	231934	1	Amino-acid biosynthesis; L-glutamate biosynthesis via GLT pathway; L-glutamate from 2-oxoglutarate and L-glutamine (NAD(+) route): step 1/1. Energy metabolism; nitrogen metabolism.	0	3 iron, 4 sulfur cluster binding; FMN binding; L-glutamate biosynthetic process; ammonia assimilation cycle; flavin adenine dinucleotide binding; glutamate biosynthetic process; glutamate synthase (NADH) activity; iron ion binding; mitochondrion	---	---	---	---	---	3.56505e-05	1.80701e-05	4.82424e-05	3.2841e-05	0.738988	7.86117e-05	7.28434e-05	3.3417e-05	1.60623e-05	2.35245	1.85605e-05	1.79641e-05	0	0	---	2.24206e-05	1.01672e-05	0	0	---	5.61516e-06	9.72574e-06	4.36973e-06	7.56859e-06	1.28501
Cluster of Heat shock protein homolog SSE1 OS=Saccharomyces cerevisiae (strain ATCC 204508 / S288c) GN=SSE1 PE=1 SV=4 (HSP7F_YEAST)	SSE1 MSI3 YPL106C LPG3C	P32589	5.12	693	77235.2	0	0	Cytoplasm.	ATP binding; adenyl-nucleotide exchange factor activity; cytoplasm; peptide binding; polysome; protein refolding; response to stress	0.000313354	0.000406192	0.000193792	3.08379e-05	1.61696	0.000972542	3.58641e-05	0.000959371	1.91068e-05	1.01373	0.000704947	0.000265914	0.0013089	8.42386e-05	0.53858	0.000653537	0.000127998	0.000453048	0.000125912	1.44253	0.000499657	7.14961e-05	0.000346915	0.000138105	1.44028	0.000413607	0.000272034	0.000324952	4.43836e-05	1.27282
Glutamate--tRNA ligase, cytoplasmic OS=Saccharomyces cerevisiae (strain ATCC 204508 / S288c) GN=GUS1 PE=1 SV=3	GUS1 YGL245W G0583 HRB724	P46655	7.21	708	80842.8	6	0	Cytoplasm.	ATP binding; RNA binding; glutamate-tRNA ligase activity; glutamyl-tRNA aminoacylation; methionyl glutamyl tRNA synthetase complex; mitochondrion	0.000334753	0.0002201	0	0	---	0.000574353	0.000201887	0.000441084	9.73948e-05	1.30214	0.00103404	0.000125039	0.000523648	0.000199044	1.97469	0.000244709	7.28151e-05	2.62011e-05	2.2725e-05	9.33964	0.000186156	6.04882e-05	0	0	---	0.000103996	4.14757e-06	1.29974e-05	2.25122e-05	8.00125
Peptidyl-prolyl cis-trans isomerase OS=Saccharomyces cerevisiae (strain ATCC 204508 / S288c) GN=CPR1 PE=1 SV=3	CPR1 CPH1 CYP1 SCC1 YDR155C YD8358.10C	P14832	6.87	162	17259.5	5	0	Cytoplasm.	Set3 complex; ascospore formation; cyclosporin A binding; histone deacetylation; mitochondrial intermembrane space; peptidyl-prolyl cis-trans isomerase activity; positive regulation of meiosis; protein folding; protein transport	0.00977075	0.00106955	0.0143811	0.00170037	0.679416	0.00768819	0.000701277	0.0057311	0.000963314	1.34149	0.00713657	0.00297743	0.00619043	0.000475123	1.15284	0.014052	0.001804	0.00459244	0.000541391	3.0598	0.0135203	0.00105267	0.00423698	0.000177291	3.19103	0.014031	0.00232862	0.00509072	0.000128693	2.7562
40S ribosomal protein S19-A OS=Saccharomyces cerevisiae (strain ATCC 204508 / S288c) GN=RPS19A PE=1 SV=2	RPS19A RP55A RPS16AA YOL121C	P07280	9.62	144	15785.9	0	0	Cytoplasm.	cytoplasmic translation; cytosolic small ribosomal subunit; rRNA export from nucleus; ribosomal small subunit biogenesis; structural constituent of ribosome	0.00721446	0.0032744	0.00749878	0.00037905	0.962085	0.010419	0.000655127	0.00613937	0.000363039	1.69708	0.00799671	0.00224813	0.00567459	0.000328369	1.40921	0.00667571	0.000932567	0.00274645	0.000135091	2.43067	0.00655012	0.000899282	0.00240627	0.000611115	2.72211	0.00526645	0.000616551	0.00254768	0.000746809	2.06716
Aconitate hydratase, mitochondrial OS=Saccharomyces cerevisiae (strain ATCC 204508 / S288c) GN=ACO1 PE=1 SV=2	ACO1 GLU1 YLR304C L8003.22	P19414	UNDEFINED	778	0	4	Carbohydrate metabolism; tricarboxylic acid cycle; isocitrate from oxaloacetate: step 2/2.	Mitochondrion. Cytoplasm.	4 iron, 4 sulfur cluster binding; aconitate hydratase activity; citrate hydro-lyase (cis-aconitate-forming) activity; cytosol; double-stranded DNA binding; isocitrate hydro-lyase (cis-aconitate-forming) activity; metal ion binding; mitochondrial genome maintenance; mitochondrial intermembrane space; mitochondrial nucleoid; single-stranded DNA binding; tricarboxylic acid cycle	---	---	---	---	---	0.0014549	8.42448e-05	0.000378296	1.54335e-05	3.84594	0.00124565	0.000208735	0.000533642	0.000141755	2.33423	0.000151425	8.21671e-05	8.35012e-05	4.24135e-05	1.81345	0.000215253	7.17593e-05	7.14095e-05	3.80908e-05	3.01435	0.000285805	0.00013209	0	0	---
Protein SCP160 OS=Saccharomyces cerevisiae (strain ATCC 204508 / S288c) GN=SCP160 PE=1 SV=3	SCP160 HX YJL080C J1017	P06105	5.64	1222	134810	0	0	Endoplasmic reticulum membrane; Peripheral membrane protein; Cytoplasmic side. Nucleus membrane; Peripheral membrane protein; Cytoplasmic side.	RNA binding; chromatin silencing at silent mating-type cassette; chromatin silencing at telomere; chromosome segregation; endoplasmic reticulum membrane; intracellular mRNA localization; meiotic telomere clustering; nuclear membrane; pheromone-dependent signal transduction involved in conjugation with cellular fusion; polysome	3.15674e-05	3.17191e-05	2.20026e-05	2.2529e-05	1.43471	0.00015555	0.000164358	0.000147867	5.85406e-05	1.05196	0.000135862	6.86377e-05	0.000225431	0.000116898	0.602674	3.36848e-05	3.48425e-05	7.83103e-06	1.35637e-05	4.30144	3.87428e-05	3.3573e-05	7.25294e-06	1.25625e-05	5.34166	4.07163e-05	3.53145e-05	0	0	---
6-phosphofructokinase subunit beta OS=Saccharomyces cerevisiae (strain ATCC 204508 / S288c) GN=PFK2 PE=1 SV=4	PFK2 YMR205C YM8325.06C	P16862	6.22	959	104486	2	Carbohydrate degradation; glycolysis; D-glyceraldehyde 3-phosphate and glycerone phosphate from D-glucose: step 3/4.	Cytoplasm.	6-phosphofructokinase activity; 6-phosphofructokinase complex; ATP binding; fructose 6-phosphate metabolic process; glycolysis; mRNA binding; mitochondrion; proton transport	8.31525e-05	4.45171e-05	0	0	---	0.000690158	0.000165352	0.000524131	8.38713e-05	1.31677	0.000924489	0.000160059	0.00067729	6.58285e-05	1.36498	6.94862e-05	6.21579e-05	0	0	---	1.20911e-05	2.09425e-05	0	0	---	3.93231e-05	4.01707e-05	0	0	---
Actin-binding protein OS=Saccharomyces cerevisiae (strain ATCC 204508 / S288c) GN=ABP1 PE=1 SV=4	ABP1 YCR088W YCR88W	P15891	4.59	592	65445	0	0	Cytoplasm â€º cytoskeleton â€º actin patch.	actin cortical patch; actin cortical patch assembly; actin filament binding; mating projection tip; protein localization	0.000177728	4.12044e-05	0.00101015	0.00025224	0.175942	0.000967429	0.000178699	0.00120174	0.000101025	0.805024	0.000731956	0.000416084	0.00171173	0.00022877	0.427612	0.000110188	0.000133576	0.000779407	8.10877e-05	0.141374	0.000381179	0.000141192	0.00057179	3.28859e-05	0.666641	0.000451655	0.000207082	0.000585366	0.000116387	0.771577
Glycine--tRNA ligase 1, mitochondrial OS=Saccharomyces cerevisiae (strain ATCC 204508 / S288c) GN=GRS1 PE=1 SV=3	GRS1 YBR121C YBR0917	P38088	5.63	690	75207.6	6	0	Cytoplasm. Mitochondrion matrix.	ATP binding; DNA-dependent transcription, termination; diadenosine tetraphosphate biosynthetic process; glycine-tRNA ligase activity; mitochondrial glycyl-tRNA aminoacylation; mitochondrial matrix; mitochondrion; protein dimerization activity	0.000152752	3.67537e-05	0	0	---	0.000792322	2.89157e-05	0.00102032	0.000148946	0.776539	0.00120361	0.00020437	0.000954901	9.92498e-05	1.26046	0.000150361	8.18791e-05	2.61918e-05	2.26841e-05	5.74074	0.000156202	5.38404e-05	2.59767e-05	2.25006e-05	6.01316	0.000194662	5.63815e-05	2.74268e-05	2.37555e-05	7.0975
RNA annealing protein YRA1 OS=Saccharomyces cerevisiae (strain ATCC 204508 / S288c) GN=YRA1 PE=1 SV=2	YRA1 YDR381W D9481.2 D9509.1	Q12159	11.33	226	24824.4	0	0	Nucleus.	RNA binding; mRNA export from nucleus; nucleotide binding; regulation of transcription, DNA-dependent; transcription export complex; transcription, DNA-dependent; transcription-coupled nucleotide-excision repair	0.000801744	0.000412381	4.05743e-05	7.02767e-05	19.7599	0.00196791	0.000243899	0.000459511	0.000185011	4.28263	0.0029078	0.000692768	0.000451134	0.000184973	6.44553	0.000565563	0.000594976	4.02279e-05	6.96768e-05	14.059	0.00058862	0.000376486	4.00923e-05	6.94418e-05	14.6816	0.000478218	0.000479655	4.2263e-05	7.32017e-05	11.3153
Cell division control protein 48 OS=Saccharomyces cerevisiae (strain ATCC 204508 / S288c) GN=CDC48 PE=1 SV=3	CDC48 YDL126C	P25694	4.82	835	91996	0	0	Microsome. Endoplasmic reticulum.	ATP binding; ATPase activity; Cdc48p-Npl4p-Ufd1p AAA ATPase complex; Cdc48p-Npl4p-Vms1p AAA ATPase complex; Doa10p ubiquitin ligase complex; ER-associated misfolded protein catabolic process; cytoplasm-associated proteasomal ubiquitin-dependent protein catabolic process; cytosol; endoplasmic reticulum membrane fusion; macroautophagy; mating projection tip; mitochondria-associated protein cataboli…	0.000110753	3.21845e-05	1.09818e-05	1.9021e-05	10.0852	0.000578919	0.000107446	0.00067143	0.000105527	0.862218	0.000368394	0.000109024	0.00058292	6.41281e-05	0.63198	0.000125867	2.08208e-05	7.83736e-05	5.38287e-05	1.60599	0.000187089	5.38007e-05	1.06145e-05	1.83848e-05	17.6258	0.000247018	0.000102967	0	0	---
Threonine--tRNA ligase, cytoplasmic OS=Saccharomyces cerevisiae (strain ATCC 204508 / S288c) GN=THS1 PE=1 SV=2	THS1 YIL078W	P04801	6.59	734	84520.4	6	0	Cytoplasm.	ATP binding; cytoplasmic translation; mitochondrion; threonine-tRNA ligase activity; threonyl-tRNA aminoacylation	0.000108893	9.44324e-05	2.53153e-05	4.38473e-05	4.30148	0.000676059	0.000140788	0.000737596	0.000175783	0.916572	0.000581868	0.000224891	0.000504728	6.24395e-05	1.15284	1.73911e-05	3.01222e-05	0	0	---	0	0	2.61304e-05	4.52591e-05	0	1.62626e-05	2.81676e-05	0	0	---
40S ribosomal protein S18-A OS=Saccharomyces cerevisiae (strain ATCC 204508 / S288c) GN=RPS18A PE=1 SV=1	RPS18A YDR450W D9461.35	P0CX55	10.27	146	16906.4	0	0	Cytoplasm.	cytoplasmic translation; cytosolic small ribosomal subunit; endonucleolytic cleavage in ITS1 to separate SSU-rRNA from 5.8S rRNA and LSU-rRNA from tricistronic rRNA transcript (SSU-rRNA, 5.8S rRNA, LSU-rRNA); mitochondrion; rRNA binding; rRNA export from nucleus; structural constituent of ribosome	0.0014303	0.00026214	0	0	---	0.00617924	0.000796131	0.00961745	0.000768657	0.642503	0.00787854	0.00252812	0.00390423	0.000487607	2.01795	0.00109924	0.00050247	6.15126e-05	0.000106543	17.8701	0.000408818	0.000139719	0	0	---	0.000592205	0.000172249	0	0	---
40S ribosomal protein S5 OS=Saccharomyces cerevisiae (strain ATCC 204508 / S288c) GN=RPS5 PE=1 SV=3	RPS5 RPS2 YJR123W J2045	P26783	8.62	225	24907.4	0	0	Cytoplasm.	90S preribosome; RNA binding; cytoplasmic translation; cytosolic small ribosomal subunit; rRNA export from nucleus; regulation of translational fidelity; structural constituent of ribosome	0.000989095	6.47235e-05	0.000195478	0.000176151	5.05988	0.0039002	0.000197667	0.0024053	0.000540835	1.6215	0.00396572	0.000541596	0.00289218	9.39908e-05	1.37119	0.000889238	0.000330799	0.000326519	0.00013737	2.72339	0.000478426	1.29321e-05	0.000243688	0.000117321	1.96327	0.000700041	0.000319064	0.000335676	0.000196322	2.08547
ATP-dependent RNA helicase eIF4A OS=Saccharomyces cerevisiae (strain ATCC 204508 / S288c) GN=TIF1 PE=1 SV=3	TIF1 TIF41A YKR059W; TIF2 TIF41B YJL138C J0660	P10081	5.02	395	44565.9	3	0	Cytoplasm.	ATP binding; ATP-dependent RNA helicase activity; eukaryotic translation initiation factor 4F complex; plasma membrane; regulation of translational initiation; ribosome; translation initiation factor activity	0.00114117	0.00073699	8.81335e-05	9.86859e-05	12.9483	0.00177127	0.000211335	0.00196925	0.000133054	0.899464	0.00243989	0.000529908	0.00208972	8.02112e-05	1.16757	0.00203492	0.000177802	0.000464419	9.51708e-05	4.38164	0.000845903	0.000273772	0.000369375	6.77328e-05	2.29009	0.00123322	0.000878489	0.000426789	6.81071e-05	2.88952
Eukaryotic translation initiation factor 4B OS=Saccharomyces cerevisiae (strain ATCC 204508 / S288c) GN=TIF3 PE=1 SV=1	TIF3 STM1 TIF42 YPR163C P9325.6	P34167	5.17	436	48522	0	0	0	RNA strand annealing activity; cytoplasmic translation; nucleotide binding; ribosome; translation initiation factor activity	0.00017837	8.42369e-05	0.00151507	0.000370938	0.11773	0.00224617	0.000148031	0.000412696	6.5784e-05	5.44267	0.00164105	0.000941428	0.00065942	0.000150468	2.48863	0.00247269	0.000431883	0.000736979	0.000165315	3.35517	0.00238818	0.000435905	0.000567038	0.000119487	4.21167	0.00226483	0.000538206	0.000775287	0.00029839	2.92127
60S ribosomal protein L5 OS=Saccharomyces cerevisiae (strain ATCC 204508 / S288c) GN=RPL5 PE=1 SV=4	RPL5 RPL1 RPL1A YPL131W LPI14W	P26321	6.39	297	33583.6	0	0	Cytoplasm. Nucleus.	5S rRNA binding; cytoplasmic translation; cytosolic large ribosomal subunit; nucleus; ribosomal large subunit assembly; structural constituent of ribosome	0.000622754	0.00018097	0.000962735	0.000234826	0.646859	0.00282449	0.000201331	0.0035154	0.000500515	0.803463	0.00329178	0.000585071	0.00301611	0.000350888	1.0914	0.000717019	0.000122839	0.00136272	0.000265565	0.526169	0.00132851	0.000120358	0.00113439	0.000345664	1.17113	0.00135819	0.000209306	0.00129605	0.00021746	1.04794
40S ribosomal protein S6-A OS=Saccharomyces cerevisiae (strain ATCC 204508 / S288c) GN=RPS6A PE=1 SV=1	RPS6A RPS101 RPS10B YPL090C LPG18C	P0CX37	10.44	236	26996.3	0	0	Cytoplasm. Nucleus â€º nucleolus.	90S preribosome; cytoplasmic translation; cytosolic small ribosomal subunit; maturation of SSU-rRNA from tricistronic rRNA transcript (SSU-rRNA, 5.8S rRNA, LSU-rRNA); nucleolus; small-subunit processome; structural constituent of ribosome	0.000888248	7.6371e-05	0.000483439	0.000489047	1.83735	0.00323044	0.000563789	0.00249638	0.000374125	1.29405	0.00355167	0.000218803	0.00258444	0.000119906	1.37425	0.00151591	0.0001837	0.00042702	0.000233201	3.54998	0.000558469	0.000181465	0.000390386	8.42902e-05	1.43055	0.000925021	0.000383895	0.000636376	7.99662e-05	1.45358
Eukaryotic translation initiation factor 5B OS=Saccharomyces cerevisiae (strain ATCC 204508 / S288c) GN=FUN12 PE=1 SV=2	FUN12 YAL035W	P39730	5.61	1002	112268	0	0	0	GTP binding; GTPase activity; cytosolic small ribosomal subunit; maturation of SSU-rRNA from tricistronic rRNA transcript (SSU-rRNA, 5.8S rRNA, LSU-rRNA); mitochondrion; regulation of translational initiation; ribosome binding; translation initiation factor activity	0.000464884	0.000242702	2.78165e-05	4.81795e-05	16.7125	0.000139486	4.33775e-05	0.000113413	2.66108e-05	1.2299	0.000157027	8.92402e-05	0.000133029	6.10746e-05	1.1804	9.06911e-05	5.65238e-05	9.07337e-06	1.57155e-05	9.99531	0	0	0.000100265	1.22928e-05	0	1.19129e-05	2.06338e-05	0.00014019	7.35743e-05	0.0849771
Nascent polypeptide-associated complex subunit beta-1 OS=Saccharomyces cerevisiae (strain ATCC 204508 / S288c) GN=EGD1 PE=1 SV=2	EGD1 YPL037C	Q02642	6.09	157	17020.2	0	0	Cytoplasm. Nucleus.	'de novo' cotranslational protein folding; nascent polypeptide-associated complex; nucleus; protein transport; regulation of transcription, DNA-dependent; transcription, DNA-dependent; unfolded protein binding	0.00318578	0.00049747	0.0091915	0.000952873	0.346601	0.00291558	0.000241799	0.00369157	0.000391024	0.789793	0.00166285	0.000696416	0.00775149	0.000354776	0.214521	0.00114076	0.000987937	0.00505987	0.00078084	0.225453	0.00219987	0.000521225	0.00484036	0.000456327	0.454486	0.00155602	0.000647027	0.00501717	0.00109724	0.310138
60S ribosomal protein L10 OS=Saccharomyces cerevisiae (strain ATCC 204508 / S288c) GN=RPL10 PE=1 SV=1	RPL10 GRC5 QSR1 YLR075W	P41805	10.03	221	25230.2	0	0	Cytoplasm.	cytoplasmic translation; cytosolic large ribosomal subunit; ribosomal large subunit assembly; structural constituent of ribosome; translational termination	---	---	---	---	---	0.00258381	0.00119419	0.00231527	0.000282498	1.11599	0.00414863	0.00131287	0.00256361	0.000197824	1.61827	0.00035979	2.16164e-05	0.000122913	0.000123417	2.92718	0	0	0.000124497	5.10057e-06	0	0.000112569	9.76342e-05	8.32775e-05	0.000144241	1.35173
60S ribosomal protein L2-A OS=Saccharomyces cerevisiae (strain ATCC 204508 / S288c) GN=RPL2A PE=1 SV=1	RPL2A RPL5B YFR031C-A YFR031BC	P0CX45	11.1	254	27277.2	0	0	Cytoplasm.	cytoplasmic translation; cytosolic large ribosomal subunit; rRNA binding; structural constituent of ribosome	0.000582631	0.000658221	3.61015e-05	6.25297e-05	16.1387	0.00274972	0.000675228	0.00187396	0.000283127	1.46733	0.00347776	0.000840351	0.00208935	0.000507824	1.66451	0.000514507	0.00015568	0	0	---	0.000330606	8.85483e-05	0	0	---	9.48387e-05	0.000164266	0	0	---
40S ribosomal protein S24-A OS=Saccharomyces cerevisiae (strain ATCC 204508 / S288c) GN=RPS24A PE=1 SV=1	RPS24A RPS24EA YER074W	P0CX31	10.51	135	15197.6	0	0	Cytoplasm.	cytoplasmic translation; cytosolic small ribosomal subunit; maturation of SSU-rRNA from tricistronic rRNA transcript (SSU-rRNA, 5.8S rRNA, LSU-rRNA); mitochondrion; nucleolus; nucleotide binding; structural constituent of ribosome; translational elongation	0.00154821	0.000411461	0.000136744	0.000118432	11.3219	0.00969957	0.00061269	0.00789617	0.00108657	1.22839	0.00600014	0.00182684	0.00319596	0.000715603	1.87741	0.00194649	0.000353962	0.000411149	0.000404253	4.73426	0.000878715	0.000378265	0.000138153	0.000119789	6.36044	0.000818098	3.26275e-05	0.000209612	0.000208303	3.90292
5-methyltetrahydropteroyltriglutamate--homocysteine methyltransferase OS=Saccharomyces cerevisiae (strain ATCC 204508 / S288c) GN=MET6 PE=1 SV=4	MET6 YER091C	P05694	6.07	767	85728.8	2	Amino-acid biosynthesis; L-methionine biosynthesis via de novo pathway; L-methionine from L-homocysteine (MetE route): step 1/1.	0	5-methyltetrahydropteroyltriglutamate-homocysteine S-methyltransferase activity; cytoplasm; methionine biosynthetic process; plasma membrane; zinc ion binding	0.00224838	0.000757574	0	0	---	0.000231713	7.44818e-05	0.00058441	0.000145803	0.39649	0.000505422	0.000388426	0.000524283	0.000135428	0.964026	0.000562408	0.000285241	2.35624e-05	2.04068e-05	23.8689	0.000264774	2.31997e-05	3.49244e-05	3.46695e-05	7.58134	0.000359308	0.000297412	0	0	---
Nuclear polyadenylated RNA-binding protein 4 OS=Saccharomyces cerevisiae (strain ATCC 204508 / S288c) GN=HRP1 PE=1 SV=1	HRP1 NAB4 NAB5 YOL123W	Q99383	5.42	534	59649.7	0	0	Cytoplasm. Nucleus.	cytoplasmic stress granule; mRNA binding; mRNA cleavage; mRNA cleavage factor complex; mRNA polyadenylation; nuclear-transcribed mRNA catabolic process, nonsense-mediated decay; nucleotide binding	0.000168796	0.000228867	0.000248937	0.000119694	0.678065	0.000333462	4.24227e-05	0.000656516	9.7364e-05	0.507927	0.00109614	0.00105371	0.000749065	0.000161172	1.46334	0.000558954	0.000312998	0.000273847	0.000101261	2.04112	0.000516845	0.000280875	0.00043052	7.22382e-05	1.20051	0.000686455	0.000118408	0.00044022	0.000164585	1.55934
Small glutamine-rich tetratricopeptide repeat-containing protein 2 OS=Saccharomyces cerevisiae (strain ATCC 204508 / S288c) GN=SGT2 PE=1 SV=1	SGT2 YOR007C UNF346	Q12118	4.68	346	37218.4	0	0	Cytoplasm.	TRC complex; posttranslational protein targeting to membrane; protein complex scaffold; response to heat	3.96609e-05	6.86946e-05	0.000603288	0.000707506	0.0657411	0.000808316	6.02649e-05	0.00271843	7.40842e-05	0.297347	0.000747372	0.000276302	0.00231292	0.000472434	0.323129	0.000229808	1.3807e-05	0.00202278	0.000249013	0.11361	0.00179411	0.000289034	0.00188018	6.3588e-05	0.954218	0.00177337	0.000272193	0.00181495	0.000258297	0.977086
60S acidic ribosomal protein P2-beta OS=Saccharomyces cerevisiae (strain ATCC 204508 / S288c) GN=RPP2B PE=1 SV=2	RPP2B L12EIA RPL45 RPLA4 YDR382W	P02400	4.07	110	11050.1	0	0	Cytoplasm.	cytoplasmic translation; cytosolic large ribosomal subunit; structural constituent of ribosome; translational elongation	0.00343774	0.00193631	0.0357985	0.00543824	0.0960303	0.0046218	0.000504514	0.0127855	0.000496773	0.361488	0.0017282	0.000703175	0.013744	0.00127816	0.125742	0.00408045	0.000731137	0.0326312	0.00323026	0.125048	0.00466783	0.00038912	0.0403803	0.000616902	0.115597	0.00290455	0.000546073	0.0379239	0.00188119	0.0765889
Glucose-6-phosphate isomerase OS=Saccharomyces cerevisiae (strain ATCC 204508 / S288c) GN=PGI1 PE=1 SV=3	PGI1 YBR196C YBR1406	P12709	5.99	554	61168.1	5	Carbohydrate degradation; glycolysis; D-glyceraldehyde 3-phosphate and glycerone phosphate from D-glucose: step 2/4.	Cytoplasm.	gluconeogenesis; glucose-6-phosphate isomerase activity; glycolysis; mitochondrion; pentose-phosphate shunt; plasma membrane	0.00676877	5.58791e-05	0	0	---	0.000873217	0.000206505	0.00127284	0.000319223	0.686041	0.00112261	0.00047858	0.000969649	1.51137e-05	1.15775	0.00476084	0.00154113	0.000446204	0.000296207	10.6697	0.00295217	0.000382092	0.000264318	2.16998e-05	11.169	0.00318847	0.00100977	0.000253851	4.72888e-06	12.5604
Hexokinase-1 OS=Saccharomyces cerevisiae (strain ATCC 204508 / S288c) GN=HXK1 PE=1 SV=2	HXK1 HKA YFR053C	P04806	5.28	485	53738.4	2	Carbohydrate metabolism; hexose metabolism.	0	ATP binding; cytosol; fructose import; fructose metabolic process; glucose import; glycolysis; hexokinase activity; mannose metabolic process; mitochondrion	0.00260952	0.00191213	1.89068e-05	3.27475e-05	138.02	0.000917373	3.8427e-05	0.00119405	0.000283708	0.768285	0.00144629	0.000360405	0.001383	0.000121386	1.04576	0.00168027	0.000471147	0.000131218	0.000227276	12.8052	0.00108656	0.000170621	3.69566e-05	3.20112e-05	29.401	0.00101834	0.000288686	5.76408e-05	5.69343e-05	17.667
5'-3' exoribonuclease 1 OS=Saccharomyces cerevisiae (strain ATCC 204508 / S288c) GN=XRN1 PE=1 SV=1	XRN1 DST2 KEM1 RAR5 SEP1 SKI1 YGL173C G1645	P22147	7.04	1528	175460	3	0	Cytoplasm. Cytoplasm â€º perinuclear region. Cytoplasm â€º P-body.	5'-3' exoribonuclease activity; RNA binding; cytoplasmic mRNA processing body; cytosol; deoxyribonuclease activity; karyogamy; microtubule; nonfunctional rRNA decay; nuclear-transcribed mRNA catabolic process; nuclear-transcribed mRNA catabolic process, nonsense-mediated decay; perinuclear region of cytoplasm; rRNA processing; traversing start control point of mitotic cell cycle	---	---	---	---	---	8.31754e-05	1.4032e-05	5.55488e-05	3.08925e-05	1.49734	0.000139514	5.4433e-05	6.78055e-05	1.3216e-05	2.05756	0	0	5.87751e-06	1.01801e-05	0	7.58862e-06	1.31439e-05	0	0	---	1.57651e-05	2.73059e-05	0	0	---
6-phosphogluconate dehydrogenase, decarboxylating 1 OS=Saccharomyces cerevisiae (strain ATCC 204508 / S288c) GN=GND1 PE=1 SV=1	GND1 YHR183W	P38720	6.19	489	53543.2	1	Carbohydrate degradation; pentose phosphate pathway; D-ribulose 5-phosphate from D-glucose 6-phosphate (oxidative stage): step 3/3.	Cytoplasm.	D-gluconate metabolic process; NADP binding; cellular response to oxidative stress; mitochondrion; pentose-phosphate shunt, oxidative branch; phosphogluconate dehydrogenase (decarboxylating) activity	0.00212531	0.000419732	0	0	---	0.00200385	0.000467472	0.00202127	0.000158657	0.991384	0.00175163	0.000358334	0.00233506	0.0002788	0.750144	0.00160822	0.000347229	0.000169057	0.00014676	9.51289	0.00053736	2.76368e-05	5.47792e-05	5.43793e-05	9.80956	0.000820955	0.000721909	5.7154e-05	5.75066e-05	14.3639
Translational activator GCN1 OS=Saccharomyces cerevisiae (strain ATCC 204508 / S288c) GN=GCN1 PE=1 SV=1	GCN1 YGL195W G1318	P33892	5.16	2672	296698	0	0	0	cytosolic ribosome; mitochondrion; regulation of translational elongation	---	---	---	---	---	7.14368e-05	3.78046e-05	1.0667e-05	2.90704e-07	6.69697	0.000166254	4.0455e-05	1.83213e-05	3.17334e-05	9.07437	0	0	0	0	---	0	0	7.17802e-06	1.24327e-05	0	0	0	3.50788e-06	6.07583e-06	0
Lysine--tRNA ligase, cytoplasmic OS=Saccharomyces cerevisiae (strain ATCC 204508 / S288c) GN=KRS1 PE=1 SV=2	KRS1 GCD5 YDR037W YD9673.09	P15180	5.78	591	67827.4	6	0	Cytoplasm.	ATP binding; cytoplasm; lysine-tRNA ligase activity; lysyl-tRNA aminoacylation; nucleic acid binding	0.00022008	6.99685e-05	3.01833e-05	2.62075e-05	7.29145	0.000839709	0.000175265	0.000887157	0.000239066	0.946517	0.000671644	0.000177538	0.000852929	0.000186212	0.787456	0.000151382	0.000163032	0	0	---	0.000103074	0.000129132	1.49968e-05	2.59752e-05	6.8731	0.000123067	5.83213e-05	0	0	---
Clustered mitochondria protein 1 OS=Saccharomyces cerevisiae (strain ATCC 204508 / S288c) GN=CLU1 PE=1 SV=1	CLU1 TIF31 YMR012W YM8270.16	Q03690	5.99	1277	145166	0	0	Cytoplasm.	eukaryotic translation initiation factor 3 complex; intracellular distribution of mitochondria; mitochondrion organization; translational initiation	4.14383e-05	3.59614e-05	4.1325e-05	4.02118e-05	1.00274	0.00013932	3.3934e-05	2.95956e-05	1.21838e-05	4.70745	0.000121945	5.4512e-05	7.92561e-05	5.08819e-05	1.53862	3.00754e-05	3.01191e-05	7.03276e-06	1.21811e-05	4.27647	0.000103105	5.93881e-05	0	0	---	9.45988e-05	5.77074e-05	0	0	---
Adenylate kinase 1 OS=Saccharomyces cerevisiae (strain ATCC 204508 / S288c) GN=ADK1 PE=1 SV=2	ADK1 AKY AKY1 AKY2 YDR226W YD9934.11	P07170	5.97	222	24036.5	2	0	Cytoplasm â€º cytosol. Mitochondrion intermembrane space.	ADP biosynthetic process; ATP binding; DNA replication initiation; adenylate kinase activity; cytosol; mitochondrial intermembrane space	0.00221993	0.000959139	0.0042976	0.00118413	0.51655	0.00480938	0.00122355	0.00221547	0.000523073	2.17082	0.00232799	0.000570779	0.00390062	0.000255407	0.596826	0.0051177	0.000376682	0.00190069	0.000321332	2.69255	0.0051197	0.000796477	0.00215278	0.000416286	2.37818	0.0053949	0.00065418	0.0020694	0.00015214	2.60698
Adenosylhomocysteinase OS=Saccharomyces cerevisiae (strain ATCC 204508 / S288c) GN=SAH1 PE=1 SV=1	SAH1 YER043C	P39954	5.83	449	49125.5	3	Amino-acid biosynthesis; L-homocysteine biosynthesis; L-homocysteine from S-adenosyl-L-homocysteine: step 1/1.	0	adenosylhomocysteinase activity; cytoplasm; methionine metabolic process; one-carbon metabolic process; selenocysteine metabolic process	0.00288276	0.000389895	1.90371e-05	3.29732e-05	151.429	0.0018406	0.000340834	0.00145723	0.000191365	1.26308	0.00150504	0.000151206	0.00190346	0.000165938	0.790686	0.00344687	0.00017067	0.000430449	0.000119089	8.00761	0.00293181	0.000217666	0.000185155	0.000181724	15.8344	0.0026663	0.000722276	0.000270653	0.000156841	9.85138
Eukaryotic translation initiation factor 3 subunit A OS=Saccharomyces cerevisiae (strain ATCC 204508 / S288c) GN=RPG1 PE=1 SV=1	RPG1 TIF32 YBR079C YBR0734	P38249	5.97	964	110344	0	0	Cytoplasm.	cytoplasmic stress granule; eukaryotic 43S preinitiation complex; eukaryotic 48S preinitiation complex; eukaryotic translation initiation factor 3 complex; formation of translation preinitiation complex; incipient cellular bud site; regulation of translational initiation; translation initiation factor activity; translation reinitiation	2.68046e-05	4.64269e-05	0	0	---	0.000356486	8.17028e-05	0.000108494	1.80584e-05	3.28576	0.000610923	0.000473259	9.65453e-05	4.50901e-06	6.32784	0.000215189	0.000109976	9.31622e-06	1.61362e-05	23.0983	0.000237134	8.2924e-05	0	0	---	0.000177857	7.70812e-05	0	0	---
60S ribosomal protein L13-A OS=Saccharomyces cerevisiae (strain ATCC 204508 / S288c) GN=RPL13A PE=1 SV=1	RPL13A YDL082W	Q12690	11.18	199	22554	0	0	Cytoplasm.	cytoplasmic translation; cytosolic large ribosomal subunit; structural constituent of ribosome	0.00274367	0.00114068	0.00157691	0.000407986	1.73991	0.00395844	0.000588502	0.00262469	0.00056831	1.50816	0.00400877	0.000210348	0.00300213	0.00025352	1.33531	0.00518022	0.000187253	0.0016134	0.000273032	3.21075	0.00414649	0.000193556	0.00194561	0.000451782	2.13121	0.00443309	0.000583079	0.00188109	0.000472727	2.35666
Single-stranded nucleic acid-binding protein OS=Saccharomyces cerevisiae (strain ATCC 204508 / S288c) GN=SBP1 PE=1 SV=2	SBP1 SSB1 SSBR1 YHL034C	P10080	5.47	294	32989.6	0	0	Cytoplasm. Nucleus â€º nucleolus.	RNA binding; cytoplasmic mRNA processing body; eukaryotic initiation factor 4G binding; negative regulation of translation in response to stress; nucleolus; nucleotide binding	0.00106628	0.000456282	0.00160803	0.000421987	0.663098	0.00107986	0.000262821	0.00293667	0.000296548	0.367716	0.00140464	0.000609434	0.00260311	0.000352927	0.539601	0.00210549	0.000433359	0.00110019	0.000322271	1.91375	0.0024783	0.000118487	0.00143458	6.77829e-05	1.72754	0.00183464	8.32901e-06	0.00098799	3.99411e-05	1.85694
Inorganic pyrophosphatase OS=Saccharomyces cerevisiae (strain ATCC 204508 / S288c) GN=IPP1 PE=1 SV=4	IPP1 PPA PPA1 YBR011C YBR0202	P00817	5.36	287	32168.4	3	0	Cytoplasm.	cytosol; inorganic diphosphatase activity; magnesium ion binding; phosphate-containing compound metabolic process; protein homodimerization activity	0.0041816	0.00131796	0.000676415	0.000422565	6.18201	0.00310231	0.000226545	0.00260976	0.00040729	1.18873	0.00259586	0.000547979	0.00299349	0.000464845	0.867168	0.0030366	0.00109048	0.000448222	4.17587e-05	6.77475	0.00241325	0.000211138	0.00041366	0.000136312	5.8339	0.00224722	0.001057	0.000390197	0.000161921	5.7592
Serine--tRNA ligase, cytoplasmic OS=Saccharomyces cerevisiae (strain ATCC 204508 / S288c) GN=SES1 PE=1 SV=2	SES1 SERS YDR023W YD9813.01	P07284	5.8	462	53309.6	6	Aminoacyl-tRNA biosynthesis; selenocysteinyl-tRNA(Sec) biosynthesis; L-seryl-tRNA(Sec) from L-serine and tRNA(Sec): step 1/1.	Cytoplasm.	ATP binding; cytoplasm; selenocysteinyl-tRNA(Sec) biosynthetic process; serine-tRNA ligase activity; seryl-tRNA aminoacylation	0.000801481	0.000288382	0.000116918	5.17803e-06	6.85505	0.000825338	0.000139862	0.00100744	0.000186663	0.81924	0.0013934	9.50291e-05	0.00091235	0.000251822	1.52726	0.00020278	6.34627e-05	6.11051e-05	6.21656e-05	3.31855	0.000257057	0.00011107	1.91842e-05	3.3228e-05	13.3994	0.000161077	8.60526e-05	8.11521e-05	0.00014056	1.98488
40S ribosomal protein S16-A OS=Saccharomyces cerevisiae (strain ATCC 204508 / S288c) GN=RPS16A PE=1 SV=1	RPS16A RP61R YMR143W YM9375.12	P0CX51	10.26	143	15716.3	0	0	Cytoplasm.	90S preribosome; cytoplasmic translation; cytosolic small ribosomal subunit; maturation of SSU-rRNA from tricistronic rRNA transcript (SSU-rRNA, 5.8S rRNA, LSU-rRNA); structural constituent of ribosome	0.000626001	0.000671898	0	0	---	0.00657315	0.0012701	0.00511571	0.00112713	1.28489	0.00766888	0.00148874	0.00353107	0.000550279	2.17183	0.00101298	0.000104896	0	0	---	0.000335373	0.000148516	0.000125342	0.000108569	2.67566	0.000353455	0.000413163	6.67933e-05	0.000115689	5.29176
Protein SIS1 OS=Saccharomyces cerevisiae (strain ATCC 204508 / S288c) GN=SIS1 PE=1 SV=1	SIS1 YNL007C N2879	P25294	9.02	352	37590	0	0	Cytoplasm. Nucleus.	DNA binding; cell cycle; cytosolic small ribosomal subunit; nucleus; protein folding; translational initiation; unfolded protein binding	0.000938839	0.000536452	0.000636337	9.07499e-05	1.47538	0.00234775	0.00022123	0.000705191	0.00022187	3.32925	0.00274225	0.00107447	0.00106152	0.000348069	2.58332	0.00145615	0.00034454	0.00159806	0.000131659	0.911196	0.00132595	0.000217348	0.00143364	0.000120061	0.924882	0.00128223	0.000279896	0.00106189	0.00036705	1.20749
40S ribosomal protein S17-A OS=Saccharomyces cerevisiae (strain ATCC 204508 / S288c) GN=RPS17A PE=1 SV=1	RPS17A RP51A YML024W	P02407	10.51	136	15788.3	0	0	Cytoplasm.	cytoplasmic translation; cytosolic small ribosomal subunit; ribosomal small subunit assembly; structural constituent of ribosome; translational elongation	0.00404957	0.000836516	0.00234292	0.00123682	1.72843	0.00683105	0.00122395	0.00440747	0.000485501	1.54988	0.00732742	0.000964696	0.00470939	0.00057001	1.55592	0.0047918	0.0007386	0.00169203	8.93333e-05	2.83199	0.00333756	0.000354923	0.00162089	0.000372229	2.05909	0.00343864	0.000708163	0.00172349	0.000241673	1.99517
60S acidic ribosomal protein P0 OS=Saccharomyces cerevisiae (strain ATCC 204508 / S288c) GN=RPP0 PE=1 SV=2	RPP0 L10E RPA0 RPL10E RPLA0 YLR340W L8300.8	P05317	4.73	312	33717.2	0	0	Cytoplasm.	90S preribosome; LSU rRNA binding; cytoplasmic translation; cytosolic large ribosomal subunit; ribosomal large subunit assembly; structural constituent of ribosome; translational elongation	0.0021381	0.000379889	8.65645e-05	3.83374e-06	24.6995	0.00167174	0.000289036	0.0019768	8.71495e-05	0.845682	0.00239379	0.000232314	0.00248496	0.000377251	0.963312	0.00171511	0.000524017	0.00205612	0.000621828	0.834152	0.00141767	0.000127479	0.00144656	0.000442847	0.980024	0.00153359	0.000124573	0.00173779	0.000584886	0.882495
Aspartate--tRNA ligase, cytoplasmic OS=Saccharomyces cerevisiae (strain ATCC 204508 / S288c) GN=DPS1 PE=1 SV=3	DPS1 APS APS1 YLL018C L1295	P04802	6.16	557	63384.3	6	0	Cytoplasm.	ATP binding; RNA binding; aspartate-tRNA ligase activity; aspartyl-tRNA aminoacylation; cytoplasm; nucleus	0.00153025	0.000256955	9.83111e-05	5.20423e-05	15.5653	0.0015061	0.000174051	0.00100366	0.000278765	1.50061	0.00114885	0.000363012	0.000888472	8.24978e-05	1.29307	0.000665506	0.000106405	4.94276e-05	4.84054e-05	13.4642	0.000215805	0.000101431	0	0	---	0.000585324	0.000511639	3.36555e-05	5.82931e-05	17.3916
60S ribosomal protein L20-A OS=Saccharomyces cerevisiae (strain ATCC 204508 / S288c) GN=RPL20A PE=1 SV=1	RPL20A RPL18A RPL18A2 YMR242C YM9408.04C	P0CX23	10.3	172	20436.8	0	0	Cytoplasm.	cytoplasmic translation; cytosolic large ribosomal subunit; structural constituent of ribosome	0.000457886	1.83073e-05	0	0	---	0.00369374	0.000534078	0.00237408	0.000523797	1.55586	0.005684	0.00171557	0.00233768	0.000448071	2.43146	---	---	---	---	---	---	---	---	---	---	---	---	---	---	---
Asparagine--tRNA ligase, cytoplasmic OS=Saccharomyces cerevisiae (strain ATCC 204508 / S288c) GN=DED81 PE=1 SV=1	DED81 YHR019C	P38707	5.6	554	62206.8	6	0	Cytoplasm.	ATP binding; asparagine-tRNA ligase activity; asparaginyl-tRNA aminoacylation; cytosol; nucleic acid binding	0.000383732	0.000196006	6.17158e-05	0.000106895	6.21772	0.000573991	8.15099e-05	0.00106477	0.000139552	0.539073	0.00056218	0.000251306	0.00127029	9.04901e-05	0.442559	0.000500105	0.000177671	4.98951e-05	1.6942e-06	10.0231	0.000235299	0.00012707	0.000149349	5.04464e-05	1.5755	0.000313755	0.000153266	3.35293e-05	2.90409e-05	9.35764
60S ribosomal protein L12-A OS=Saccharomyces cerevisiae (strain ATCC 204508 / S288c) GN=RPL12A PE=1 SV=1	RPL12A RPL15B YEL054C	P0CX53	9.44	165	17691.4	0	0	Cytoplasm.	RNA binding; cytoplasmic translation; cytosolic large ribosomal subunit; ribosomal large subunit assembly; structural constituent of ribosome	0.00293659	0.00102982	0.00112475	0.000645871	2.61089	0.00562543	0.000578073	0.00332708	0.000613669	1.6908	0.004091	0.000697199	0.00337696	0.00045746	1.21145	0.00421747	0.000783896	0.00156217	7.26615e-05	2.69975	0.00447903	0.00110537	0.00154686	0.000289461	2.89557	0.00414712	0.000659243	0.00102171	0.000163044	4.05901
Aminopeptidase 2, mitochondrial OS=Saccharomyces cerevisiae (strain ATCC 204508 / S288c) GN=APE2 PE=1 SV=4	APE2 LAP1 YKL157W YKL158W YKL611 YKL612	P32454	6.32	952	102076	3	0	Periplasm. Cytoplasm. Mitochondrion.	cell wall-bounded periplasmic space; extracellular region; metalloaminopeptidase activity; mitochondrion; peptide catabolic process; proteolysis; zinc ion binding	0.000839807	1.68795e-05	0	0	---	0.0002007	8.16646e-05	0.00035638	0.000177806	0.563164	0.000160446	0.000110188	0.00039865	8.34817e-05	0.402474	0.000195398	3.17105e-05	9.54991e-06	1.65409e-05	20.4607	5.11626e-05	5.88215e-05	1.90354e-05	3.29703e-05	2.68776	0.000155624	4.47991e-05	2.93575e-05	2.95386e-05	5.30101
Coatomer subunit alpha OS=Saccharomyces cerevisiae (strain ATCC 204508 / S288c) GN=COP1 PE=1 SV=2	COP1 RET1 SEC33 SOO1 YDL145C D1578	P53622	5.66	1201	135607	0	0	Cytoplasm. Golgi apparatus membrane; Peripheral membrane protein; Cytoplasmic side. Cytoplasmic vesicle â€º COPI-coated vesicle membrane; Peripheral membrane protein; Cytoplasmic side.	COPI vesicle coat; ER to Golgi vesicle-mediated transport; intracellular protein transport; retrograde vesicle-mediated transport, Golgi to ER; structural molecule activity; ubiquitin binding	---	---	---	---	---	2.10706e-05	3.64953e-05	7.73631e-06	1.33997e-05	2.72359	0.000162207	3.41433e-05	9.44194e-05	1.29109e-05	1.71794	---	---	---	---	---	---	---	---	---	---	---	---	---	---	---
Homoserine dehydrogenase OS=Saccharomyces cerevisiae (strain ATCC 204508 / S288c) GN=HOM6 PE=1 SV=1	HOM6 YJR139C J2132	P31116	6.86	359	38502.1	1	Amino-acid biosynthesis; L-methionine biosynthesis via de novo pathway; L-homoserine from L-aspartate: step 3/3. Amino-acid biosynthesis; L-threonine biosynthesis; L-threonine from L-aspartate: step 3/5.	0	NADP binding; cytoplasm; homoserine biosynthetic process; homoserine dehydrogenase activity; isoleucine biosynthetic process; methionine biosynthetic process; nucleus; threonine biosynthetic process	0.00205308	0.000310113	0	0	---	0.00120407	5.65903e-05	0.00237383	0.000381396	0.507229	0.00098991	8.89133e-05	0.0023353	0.000182059	0.42389	0.000905372	0.000572443	2.53246e-05	4.38634e-05	35.7508	0.00026621	5.62812e-05	2.52391e-05	4.37155e-05	10.5475	0.000314832	0.000289082	0	0	---
Elongation factor 1-gamma 2 OS=Saccharomyces cerevisiae (strain ATCC 204508 / S288c) GN=TEF4 PE=1 SV=1	TEF4 EFC1 YKL081W	P36008	7.63	412	46520.2	0	Protein biosynthesis; polypeptide chain elongation.	Cytoplasm.	eukaryotic translation elongation factor 1 complex; mitochondrion; ribosome; translation elongation factor activity	0.000669047	2.675e-05	0	0	---	0.00172758	0.000182968	0.00186697	4.84471e-05	0.925338	0.00204439	2.91794e-05	0.00184889	0.00019622	1.10574	0.000620068	0.000267273	8.77299e-05	7.59806e-05	7.06792	0.000261601	9.01696e-05	0	0	---	0.00024266	0.000234138	0	0	---
V-type proton ATPase subunit B OS=Saccharomyces cerevisiae (strain ATCC 204508 / S288c) GN=VMA2 PE=1 SV=2	VMA2 VAT2 YBR127C YBR1002	P16140	4.95	517	57749.2	0	0	0	ATP binding; ATP hydrolysis coupled proton transport; cellular calcium ion homeostasis; fungal-type vacuole membrane; integral to membrane; proton-transporting ATPase activity, rotational mechanism; vacuolar acidification; vacuolar proton-transporting V-type ATPase, V1 domain	0.00121378	0.00030112	3.30663e-05	5.72725e-05	36.7075	0.00167157	0.000174608	0.00121458	0.000213527	1.37625	0.00163566	0.00021071	0.000778859	0.000242973	2.10007	0.00202048	0.000686937	0.000142813	3.27082e-05	14.1478	0.00161831	0.00019297	0.00012358	2.67724e-05	13.0953	0.00162904	0.000656023	0.000216939	5.03602e-05	7.50923
Enolase 1 OS=Saccharomyces cerevisiae (strain ATCC 204508 / S288c) GN=ENO1 PE=1 SV=3	ENO1 ENOA HSP48 YGR254W G9160	P00924	6.17	437	46684.9	4	Carbohydrate degradation; glycolysis; pyruvate from D-glyceraldehyde 3-phosphate: step 4/5.	Cytoplasm.	fungal-type vacuole; gluconeogenesis; glycolysis; magnesium ion binding; mitochondrion; phosphopyruvate hydratase activity; phosphopyruvate hydratase complex; plasma membrane; regulation of vacuole fusion, non-autophagic	0.0258748	0.0034576	0.00490579	0.000661292	5.27433	0.0161185	0.000865853	0.0112557	0.00140046	1.43203	0.0101367	0.00125226	0.0140058	0.000989821	0.723749	0.0120679	0.0038333	0.00681778	0.00134007	1.77006	0.00997275	0.000944505	0.00437681	0.00095169	2.27854	0.0122516	0.00309978	0.00429217	0.000677557	2.8544
Arginine--tRNA ligase, cytoplasmic OS=Saccharomyces cerevisiae (strain ATCC 204508 / S288c) GN=YDR341C PE=1 SV=1	YDR341C D9651.10	Q05506	6.33	607	69525	6	0	Cytoplasm.	ATP binding; arginine-tRNA ligase activity; arginyl-tRNA aminoacylation; mitochondrion	0.000108765	3.98803e-05	0	0	---	0.000627061	0.000310858	0.000389129	0.000136726	1.61145	0.000726496	0.0004593	0.000272385	0.000131691	2.66717	6.54055e-05	6.32166e-05	0	0	---	0	0	0	0	---	3.96854e-05	6.87371e-05	0	0	---
Transaldolase OS=Saccharomyces cerevisiae (strain ATCC 204508 / S288c) GN=TAL1 PE=1 SV=4	TAL1 YLR354C L9638.6	P15019	6.08	335	36905.2	2	Carbohydrate degradation; pentose phosphate pathway; D-glyceraldehyde 3-phosphate and beta-D-fructose 6-phosphate from D-ribose 5-phosphate and D-xylulose 5-phosphate (non-oxidative stage): step 2/3.	0	cytoplasm; nucleus; pentose-phosphate shunt; sedoheptulose-7-phosphate:D-glyceraldehyde-3-phosphate glyceronetransferase activity	0.0029058	0.000644835	5.10307e-05	8.83878e-05	56.9421	0.00189905	0.000252602	0.00178599	0.000140977	1.0633	0.00221762	0.000277471	0.00169662	0.000111025	1.30708	0.00128396	0.000564094	0.000112506	0.000131514	11.4124	0.000569766	0.000115377	0.000105828	0.0001833	5.38388	0.00100146	0.000528512	0.0001959	4.85238e-05	5.11209
C-1-tetrahydrofolate synthase, cytoplasmic OS=Saccharomyces cerevisiae (strain ATCC 204508 / S288c) GN=ADE3 PE=1 SV=1	ADE3 YGR204W G7733	P07245	6.37	946	102205	1	One-carbon metabolism; tetrahydrofolate interconversion.	Cytoplasm. Nucleus.	ATP binding; cytoplasm; folic acid-containing compound biosynthetic process; folic acid-containing compound metabolic process; formate-tetrahydrofolate ligase activity; histidine biosynthetic process; methenyltetrahydrofolate cyclohydrolase activity; methionine biosynthetic process; methylenetetrahydrofolate dehydrogenase (NADP+) activity; nucleus; purine nucleobase biosynthetic process; purine n…	0.000122986	6.88312e-05	0	0	---	0.000268318	0.000121583	0.000170563	3.36316e-05	1.57313	0.000260755	0.000121288	0.000140737	4.32472e-05	1.85278	---	---	---	---	---	---	---	---	---	---	---	---	---	---	---
Cys-Gly metallodipeptidase DUG1 OS=Saccharomyces cerevisiae (strain ATCC 204508 / S288c) GN=DUG1 PE=1 SV=1	DUG1 YFR044C	P43616	5.43	481	52871.4	3	0	Cytoplasm.	glutathione catabolic process; metal ion binding; metallodipeptidase activity; mitochondrion; omega peptidase activity; proteolysis; tripeptidase activity	0.00225011	0.00057165	0.00016845	7.46024e-06	13.3577	0.00068741	0.000121521	0.00157695	0.000190096	0.43591	0.00109638	8.92498e-05	0.00124703	0.000117035	0.879195	0.00241217	0.000181177	0.000570773	0.000190527	4.22614	0.00201389	8.34821e-05	0.000606254	0.000120804	3.32185	0.00190851	0.000176085	0.000409328	7.62519e-06	4.66255
Tyrosine--tRNA ligase, cytoplasmic OS=Saccharomyces cerevisiae (strain ATCC 204508 / S288c) GN=TYS1 PE=1 SV=3	TYS1 MGM104 YGR185C G7522	P36421	8.57	394	43888.8	6	0	Cytoplasm. Nucleus.	ATP binding; cytoplasm; nucleus; tyrosine-tRNA ligase activity; tyrosyl-tRNA aminoacylation	0.000966187	0.000155569	0	0	---	0.00113053	0.000250954	0.000816189	0.000190485	1.38513	0.00104493	0.000456538	0.000542395	0.000252738	1.92652	9.7478e-05	9.76194e-05	0	0	---	6.04202e-05	5.23777e-05	0	0	---	0.000286591	0.000263422	0	0	---
Translationally-controlled tumor protein homolog OS=Saccharomyces cerevisiae (strain ATCC 204508 / S288c) GN=TMA19 PE=1 SV=1	TMA19 MMI1 YKL056C YKL312	P35691	4.41	167	18741.1	0	0	Cytoplasm â€º cytoskeleton. Mitochondrion.	cellular response to oxidative stress; cytoplasmic translation; cytosol; microtubule; mitochondrion	0.00362354	0.000986463	0.00314907	0.0011615	1.15067	0.00327461	0.000480318	0.00479598	0.00108822	0.682782	0.00318463	0.00062776	0.00490457	0.00103761	0.649319	0.00183616	0.000394028	0.00186459	0.000449335	0.984756	0.00236588	0.000670756	0.00119883	0.000299479	1.9735	0.00213169	0.000348075	0.00112493	0.000214742	1.89495
40S ribosomal protein S15 OS=Saccharomyces cerevisiae (strain ATCC 204508 / S288c) GN=RPS15 PE=1 SV=1	RPS15 RPS21 YOL040C	Q01855	10.7	142	15870.6	0	0	Cytoplasm.	RNA binding; cytoplasmic translation; cytosolic small ribosomal subunit; rRNA export from nucleus; structural constituent of ribosome	0.000728344	0.000400909	6.54274e-05	0.000113324	11.1321	0.00447396	0.000645208	0.00388719	0.00103705	1.15095	0.00571834	0.000881616	0.00420913	0.000985362	1.35856	0.00323973	0.000712005	0	0	---	0.0026095	0.000280552	0	0	---	0.00206926	0.000416977	0	0	---
Peroxiredoxin type-2 OS=Saccharomyces cerevisiae (strain ATCC 204508 / S288c) GN=AHP1 PE=1 SV=4	AHP1 YLR109W L2916 L9354.5	P38013	5.01	176	18983.5	1	0	Cytoplasm.	cell redox homeostasis; cellular response to oxidative stress; cytoplasm; plasma membrane; response to metal ion; thioredoxin peroxidase activity	0.0126389	0.0036789	0.000558872	0.00035007	22.6149	0.00267788	0.00110967	0.00924417	0.00208031	0.289683	0.00174144	0.000458336	0.00515803	0.000162439	0.337617	0.00291198	0.00164314	0.000257653	0.000322897	11.302	0.00155266	0.000538257	0.000465979	0.000145848	3.33204	0.00191515	0.00140521	0.000318608	0.000158305	6.01098
Asparagine synthetase [glutamine-hydrolyzing] 1 OS=Saccharomyces cerevisiae (strain ATCC 204508 / S288c) GN=ASN1 PE=1 SV=2	ASN1 YPR145W P9659.3	P49089	5.73	572	64339.1	6	Amino-acid biosynthesis; L-asparagine biosynthesis; L-asparagine from L-aspartate (L-Gln route): step 1/1.	0	ATP binding; L-asparagine biosynthetic process; asparagine biosynthetic process; asparagine synthase (glutamine-hydrolyzing) activity; cytoplasm; glutamine metabolic process	9.00264e-05	0.000103614	0	0	---	0.000778393	0.000215689	0.00106269	0.000157743	0.732475	0.000824323	0.000512898	0.000907586	0.00028391	0.908258	0.000255703	4.95721e-05	0	0	---	0.000126302	6.46175e-05	0	0	---	0.0001301	6.9504e-05	0	0	---
60S ribosomal protein L11-A OS=Saccharomyces cerevisiae (strain ATCC 204508 / S288c) GN=RPL11A PE=1 SV=2	RPL11A RP39A RPL16A YPR102C P8283.14	P0C0W9	9.92	174	19588.4	0	0	Cytoplasm. Nucleus.	cytoplasmic translation; cytosolic large ribosomal subunit; nucleus; rRNA binding; ribosomal large subunit assembly; structural constituent of ribosome	0.00044695	0.000211076	0	0	---	0.00175482	0.000231474	0.00218352	0.000494539	0.803666	0.00274409	0.00127922	0.00272887	0.000346505	1.00558	0.000302488	0.000335372	0	0	---	0.000139578	0.000120883	0	0	---	0.000137204	0.000237644	0	0	---
Mannose-6-phosphate isomerase OS=Saccharomyces cerevisiae (strain ATCC 204508 / S288c) GN=PMI40 PE=1 SV=4	PMI40 YER003C	P29952	5.65	429	48057.5	5	Nucleotide-sugar biosynthesis; GDP-alpha-D-mannose biosynthesis; alpha-D-mannose 1-phosphate from D-fructose 6-phosphate: step 1/2.	Cytoplasm.	GDP-mannose biosynthetic process; cell wall mannoprotein biosynthetic process; cytoplasm; mannose-6-phosphate isomerase activity; nucleus; protein glycosylation; zinc ion binding	0.000575829	0.000210882	8.14304e-05	9.07867e-05	7.07143	0.00103756	0.000137424	0.000841186	7.33068e-05	1.23345	0.000476681	0.000237091	0.000993437	0.000208264	0.47983	0.000830521	0.000224199	6.3577e-05	0.000110119	13.0632	0.000474319	0.000215126	4.17808e-05	3.61898e-05	11.3526	0.000340917	0.000138746	0	0	---
40S ribosomal protein S12 OS=Saccharomyces cerevisiae (strain ATCC 204508 / S288c) GN=RPS12 PE=1 SV=1	RPS12 YOR369C	P48589	4.68	143	15471.7	0	0	Cytoplasm.	cytoplasmic translation; cytosolic small ribosomal subunit; structural constituent of ribosome	0.00183854	0.000212254	0.000681801	0.000355668	2.6966	0.00409226	0.000438934	0.00610079	0.000483898	0.670775	0.00343532	0.000418656	0.0044624	0.000997854	0.769838	0.00222493	0.000557495	0.00063936	0.000206029	3.47994	0.00218058	0.000429184	0.000644274	0.000139108	3.38456	0.00232802	0.000599816	0.000525719	0.00012104	4.42826
Glutamine--tRNA ligase OS=Saccharomyces cerevisiae (strain ATCC 204508 / S288c) GN=GLN4 PE=1 SV=2	GLN4 YOR168W O3601	P13188	8.56	809	93132.8	6	0	0	ATP binding; cytosol; glutamine-tRNA ligase activity; glutaminyl-tRNA aminoacylation; mitochondrion	0.000131503	7.88753e-05	0	0	---	0.000219671	9.68604e-05	0.000305439	2.39751e-05	0.719197	0.000313506	0.000175024	0.000253953	0.000152996	1.2345	1.57788e-05	2.73297e-05	1.18288e-05	2.04881e-05	1.33393	4.41882e-05	4.47946e-05	2.28096e-05	1.97996e-05	1.93727	0	0	5.79484e-05	2.01253e-05	0
Eisosome protein 1 OS=Saccharomyces cerevisiae (strain ATCC 204508 / S288c) GN=EIS1 PE=1 SV=1	EIS1 YMR031C YM9973.04C	Q05050	5.99	843	93214	0	0	Cytoplasmic granule. Cell membrane; Peripheral membrane protein; Cytoplasmic side.	eisosome; eisosome assembly; mitochondrion; plasma membrane	1.62784e-05	2.81949e-05	0.000567284	7.08902e-05	0.0286952	9.11096e-05	0.000120925	0	0	---	7.8756e-05	0.000136409	0.000183307	6.20782e-05	0.429641	0.000138411	0.00015674	0.000448274	2.8094e-05	0.308765	0.000480983	0.00012208	0.000551708	0.00015053	0.871808	0.0006082	0.000110117	0.00047844	2.75447e-05	1.27121
Phosphoribosylformylglycinamidine synthase OS=Saccharomyces cerevisiae (strain ATCC 204508 / S288c) GN=ADE6 PE=1 SV=2	ADE6 YGR061C	P38972	5.15	1358	148905	6	Purine metabolism; IMP biosynthesis via de novo pathway; 5-amino-1-(5-phospho-D-ribosyl)imidazole from N(2)-formyl-N(1)-(5-phospho-D-ribosyl)glycinamide: step 1/2.	Cytoplasm.	'de novo' IMP biosynthetic process; ATP binding; cytoplasm; glutamine metabolic process; phosphoribosylformylglycinamidine synthase activity	0.000107928	6.57135e-05	0	0	---	0.000215534	4.42752e-05	0.000350519	7.25378e-05	0.6149	0.00010362	4.89117e-05	0.000366299	5.2558e-05	0.282885	5.01464e-05	3.79066e-05	0	0	---	2.66784e-05	4.62083e-05	0	0	---	2.71887e-05	2.66269e-05	0	0	---
Cystathionine gamma-lyase OS=Saccharomyces cerevisiae (strain ATCC 204508 / S288c) GN=CYS3 PE=1 SV=2	CYS3 CYI1 STR1 YAL012W FUN35	P31373	6.05	394	42410.9	4	Amino-acid biosynthesis; L-cysteine biosynthesis; L-cysteine from L-homocysteine and L-serine: step 2/2.	Cytoplasm.	L-cysteine desulfhydrase activity; L-cystine L-cysteine-lyase (deaminating); cystathionine gamma-lyase activity; cysteine biosynthetic process via cystathionine; cytoplasm; nucleus; pyridoxal phosphate binding; transsulfuration	0.00283077	8.70817e-05	0.000271036	0.000125855	10.4443	0.00177436	0.000215749	0.00163613	0.000181352	1.08449	0.00155419	0.000386077	0.00149036	0.000184876	1.04283	0.00228758	0.00102021	0.000605912	9.1471e-05	3.77543	0.00106186	4.0429e-05	0.000836641	5.22788e-05	1.2692	0.00154696	0.000861972	0.00078349	0.000128174	1.97444
60S acidic ribosomal protein P2-alpha OS=Saccharomyces cerevisiae (strain ATCC 204508 / S288c) GN=RPP2A PE=1 SV=1	RPP2A L12EIB RPA2 RPL44 RPLA2 YOL039W	P05319	3.94	106	10745.8	0	0	Cytoplasm.	cytoplasmic translation; cytosolic large ribosomal subunit; structural constituent of ribosome; translational elongation	0.00307756	0.00146217	0.0359158	0.00820276	0.0856884	0.00119731	0.000542536	0.0105545	0.00098479	0.113441	0.00135562	0.000820944	0.0103233	0.000700107	0.131316	0.00419569	0.00151129	0.0459907	0.00192646	0.091229	0.00721682	0.000303951	0.044849	0.00322383	0.160914	0.00508006	0.000343045	0.04777	0.00947558	0.106344
Mannose-1-phosphate guanyltransferase OS=Saccharomyces cerevisiae (strain ATCC 204508 / S288c) GN=PSA1 PE=1 SV=2	PSA1 MPG1 SRB1 VIG9 YDL055C	P41940	5.95	361	39565.9	2	Nucleotide-sugar biosynthesis; GDP-alpha-D-mannose biosynthesis; GDP-alpha-D-mannose from alpha-D-mannose 1-phosphate (GTP route): step 1/1.	Cytoplasm.	GDP-mannose biosynthetic process; GTP binding; cell cycle; cell wall mannoprotein biosynthetic process; cytoplasm; mannose-1-phosphate guanylyltransferase activity; protein glycosylation	0.00105928	0.000367814	0	0	---	0.00155056	0.000442331	0.000946421	6.37631e-05	1.63834	0.00193414	0.000189803	0.000913612	5.47504e-05	2.11703	0.000365749	5.34467e-05	0.000102061	0.000114997	3.58362	0.00036302	0.000251091	0	0	---	0.000379817	0.000270927	7.78925e-05	0.000134914	4.87616
Cysteine--tRNA ligase OS=Saccharomyces cerevisiae (strain ATCC 204508 / S288c) GN=YNL247W PE=1 SV=1	YNL247W N0885	P53852	6.4	767	87530.2	6	0	0	ATP binding; cysteine-tRNA ligase activity; cysteinyl-tRNA aminoacylation; cytosol; metal ion binding	6.7705e-05	7.57021e-05	1.11443e-05	1.93024e-05	6.07533	0.000116442	0.000104158	0.000235078	1.72779e-05	0.495333	0.000148839	5.63852e-05	0.000240533	5.70325e-05	0.61879	9.06192e-05	0.000116265	0.000130767	7.10815e-05	0.69298	7.90737e-05	7.22692e-05	9.51128e-05	1.7441e-05	0.831367	1.67316e-05	2.898e-05	9.8248e-05	4.43351e-05	0.1703
AP-1 accessory protein LAA1 OS=Saccharomyces cerevisiae (strain ATCC 204508 / S288c) GN=LAA1 PE=1 SV=1	LAA1 YJL207C HRD550 J0312	P39526	5.49	2014	229900	0	0	Golgi apparatus.	Golgi apparatus; protein localization; protein transport; retrograde transport, endosome to Golgi	---	---	---	---	---	2.51399e-05	2.17718e-05	4.30709e-05	3.90769e-05	0.583685	1.13354e-05	1.96335e-05	3.08859e-05	1.61175e-05	0.367008	---	---	---	---	---	---	---	---	---	---	---	---	---	---	---
Adenylosuccinate lyase OS=Saccharomyces cerevisiae (strain ATCC 204508 / S288c) GN=ADE13 PE=1 SV=1	ADE13 YLR359W L8039.12	Q05911	6.01	482	54510.5	4	Purine metabolism; AMP biosynthesis via de novo pathway; AMP from IMP: step 2/2. Purine metabolism; IMP biosynthesis via de novo pathway; 5-amino-1-(5-phospho-D-ribosyl)imidazole-4-carboxamide from 5-amino-1-(5-phospho-D-ribosyl)imidazole-4-carboxylate: step 2/2.	0	'de novo' AMP biosynthetic process; 'de novo' IMP biosynthetic process; (S)-2-(5-amino-1-(5-phospho-D-ribosyl)imidazole-4-carboxamido)succinate AMP-lyase (fumarate-forming) activity; N6-(1,2-dicarboxyethyl)AMP AMP-lyase (fumarate-forming) activity	0.000513414	0.0003241	0	0	---	0.000421591	0.000118341	5.83667e-05	5.86371e-05	7.22315	0.000991619	0.000510982	0.000189994	0.000119851	5.21922	---	---	---	---	---	---	---	---	---	---	---	---	---	---	---
60S ribosomal protein L25 OS=Saccharomyces cerevisiae (strain ATCC 204508 / S288c) GN=RPL25 PE=1 SV=4	RPL25 YOL127W	P04456	10.11	142	15626.4	0	0	Cytoplasm.	RNA binding; cytoplasmic translation; cytosolic large ribosomal subunit; nucleotide binding; rRNA binding; ribosomal large subunit assembly; structural constituent of ribosome	0.00181803	0.00110187	0	0	---	0.00285978	0.00106814	0.00214692	0.000501503	1.33204	0.00445824	0.00136049	0.00186133	0.000921231	2.3952	0.00297995	1.36888e-05	0	0	---	0.00244957	0.000447655	0	0	---	0.00231513	0.000607098	0	0	---
40S ribosomal protein S13 OS=Saccharomyces cerevisiae (strain ATCC 204508 / S288c) GN=RPS13 PE=1 SV=3	RPS13 RPS13C YDR064W D4252 YD9609.18	P05756	10.44	151	16897.7	0	0	Cytoplasm.	90S preribosome; SSU rRNA binding; cytoplasmic translation; cytosolic small ribosomal subunit; maturation of SSU-rRNA from tricistronic rRNA transcript (SSU-rRNA, 5.8S rRNA, LSU-rRNA); structural constituent of ribosome	---	---	---	---	---	0.00462993	0.000256742	0.00340338	0.00042214	1.36039	0.00485322	0.000977952	0.00177928	0.000121342	2.72763	0.000459929	0.000590758	0	0	---	0	0	0	0	---	0.000164753	0.000142895	0	0	---
40S ribosomal protein S22-A OS=Saccharomyces cerevisiae (strain ATCC 204508 / S288c) GN=RPS22A PE=1 SV=2	RPS22A RPS24 RPS24A YJL190C J0355	P0C0W1	9.94	130	14494.9	0	0	Cytoplasm.	cytoplasmic translation; cytosolic small ribosomal subunit; structural constituent of ribosome	0.00041606	0.000485867	0	0	---	0.00468955	0.00102606	0.00437928	0.000366622	1.07085	0.00629674	0.00155267	0.002939	2.19105e-05	2.14248	0.000927851	0.00036022	0	0	---	9.28955e-05	0.0001609	0	0	---	0.000290083	0.000296336	0	0	---
Phenylalanine--tRNA ligase alpha subunit OS=Saccharomyces cerevisiae (strain ATCC 204508 / S288c) GN=FRS2 PE=1 SV=3	FRS2 YFL022C	P15625	5.52	503	57380.2	6	0	Cytoplasm.	ATP binding; phenylalanine-tRNA ligase activity; phenylalanine-tRNA ligase complex; phenylalanyl-tRNA aminoacylation; tRNA binding	0.000340296	0.000346935	3.39867e-05	5.88666e-05	10.0126	0.00101104	3.98995e-05	0.000599879	0.000240957	1.68541	0.000543691	0.000355845	0.00101222	0.000249001	0.537126	8.1724e-05	8.46578e-05	1.80746e-05	3.13061e-05	4.52149	0	0	0.000130961	0.000134252	0	0.000153079	0.000265141	0.000148765	3.02031e-05	1.029
Adenosine kinase OS=Saccharomyces cerevisiae (strain ATCC 204508 / S288c) GN=ADO1 PE=1 SV=1	ADO1 YJR105W J1973	P47143	4.99	340	36372.3	2	Purine metabolism; AMP biosynthesis via salvage pathway; AMP from adenosine: step 1/1.	0	AMP salvage; ATP binding; adenosine kinase activity; cytoplasm; nucleus; phosphotransferase activity, alcohol group as acceptor; purine nucleobase metabolic process; purine ribonucleoside salvage	0.00116689	0.000394415	0.000150841	0.000261264	7.73591	0.00127188	7.50341e-05	0.00176337	0.000215143	0.72128	0.000706183	0.000111438	0.00279979	0.000181495	0.252227	0.000613115	0.000770565	0	0	---	7.1431e-05	6.18639e-05	2.66496e-05	4.61584e-05	2.68038	0.000110914	0.000113305	2.80925e-05	4.86576e-05	3.94818
Citrate synthase, mitochondrial OS=Saccharomyces cerevisiae (strain ATCC 204508 / S288c) GN=CIT1 PE=1 SV=2	CIT1 GLU3 LYS6 YNR001C N2019	P00890	6.49	479	49216.3	2	Carbohydrate metabolism; tricarboxylic acid cycle; isocitrate from oxaloacetate: step 1/2.	Mitochondrion matrix.	acetyl-CoA catabolic process; cellular carbohydrate metabolic process; citrate (Si)-synthase activity; citrate metabolic process; cytosol; glutamate biosynthetic process; mitochondrial intermembrane space; mitochondrial matrix; tricarboxylic acid cycle	0.000305601	0.000186006	0	0	---	0.000583507	0.00011811	0.000831509	0.000105133	0.701744	0.001223	0.000531542	0.000453366	2.11738e-05	2.6976	0.000749814	0.000125359	0.000174351	6.36947e-05	4.30059	0.000624326	0.000232896	0.000284579	9.0484e-05	2.19386	0.000816762	8.76053e-05	9.71264e-05	8.94464e-05	8.40927
Alanine--tRNA ligase, mitochondrial OS=Saccharomyces cerevisiae (strain ATCC 204508 / S288c) GN=ALA1 PE=1 SV=3	ALA1 CDC64 YOR335C	P40825	5.36	983	107390	6	0	Cytoplasm. Mitochondrion.	ATP binding; alanine-tRNA ligase activity; metal ion binding; mitochondrial alanyl-tRNA aminoacylation; mitochondrion; tRNA binding	---	---	---	---	---	0.000219763	7.99135e-05	7.68944e-05	3.16556e-05	2.85799	0.000144285	5.16203e-05	7.32403e-05	3.5818e-05	1.97002	0.000276241	0.000191539	7.49984e-05	4.23767e-05	3.68329	0.00029376	0.00010322	1.84351e-05	3.19305e-05	15.9348	0.000287465	2.97132e-05	1.87226e-05	3.24285e-05	15.3539
1,3-beta-glucanosyltransferase GAS1 OS=Saccharomyces cerevisiae (strain ATCC 204508 / S288c) GN=GAS1 PE=1 SV=2	GAS1 GGP1 YMR307W YM9952.09	P22146	4.37	559	54355.1	2	0	Cell membrane; Lipid-anchor â€º GPI-anchor. Secreted â€º cell wall.	1,3-beta-glucanosyltransferase activity; ER to Golgi transport vesicle; anchored to membrane; carbohydrate metabolic process; cellular bud scar; chromatin silencing; extracellular region; filamentous growth; fungal-type cell wall organization; integral to membrane; membrane raft; mitochondrion; nuclear periphery; plasma membrane; primary cell septum	0.000348359	0.000174147	0.0014796	8.99089e-05	0.235441	0.000660032	0.000159713	0.0012982	0.000424982	0.508422	0.000725663	0.000369987	0.0011485	0.000149115	0.631835	0.000584657	0.000224944	0.000972055	5.453e-05	0.601465	0.000920257	5.05363e-05	0.000978954	0.000182813	0.940041	0.000629397	0.000254246	0.00107654	0.000278994	0.584647
Protein FMP27, mitochondrial OS=Saccharomyces cerevisiae (strain ATCC 204508 / S288c) GN=FMP27 PE=1 SV=1	FMP27 YLR454W	Q06179	UNDEFINED	2628	0	0	0	Mitochondrion.	mitochondrion	---	---	---	---	---	---	---	---	---	---	1.28906e-05	1.19198e-05	2.37736e-05	3.19896e-05	0.542223	---	---	---	---	---	---	---	---	---	---	---	---	---	---	---
Ribonucleoside-diphosphate reductase small chain 2 OS=Saccharomyces cerevisiae (strain ATCC 204508 / S288c) GN=RNR4 PE=1 SV=1	RNR4 CRT3 YGR180C	P49723	5.11	345	40054.6	1	Genetic information processing; DNA replication.	Nucleus.	DNA replication; cofactor biosynthetic process; deoxyribonucleoside diphosphate metabolic process; deoxyribonucleotide biosynthetic process; nucleus; ribonucleoside-diphosphate reductase activity, thioredoxin disulfide as acceptor; ribonucleoside-diphosphate reductase complex; transition metal ion binding	0.00193339	0.000291498	0	0	---	7.43797e-05	0.000128829	0	0	---	0.000895567	8.84658e-05	0.00176745	6.48997e-05	0.506701	0.00193409	0.000473518	0	0	---	0.00107824	0.00023969	0.000320921	0.000278571	3.35982	0.0013895	0.000156642	2.66729e-05	4.61989e-05	52.0938
60S ribosomal protein L14-A OS=Saccharomyces cerevisiae (strain ATCC 204508 / S288c) GN=RPL14A PE=1 SV=1	RPL14A YKL006W YKL153	P36105	10.94	138	15035.9	0	0	Cytoplasm.	RNA binding; cytoplasmic translation; cytosolic large ribosomal subunit; structural constituent of ribosome	---	---	---	---	---	0.00460743	0.000178767	0.00240752	5.99045e-05	1.91377	0.00477182	0.00103601	0.00147222	0.000760308	3.24124	---	---	---	---	---	---	---	---	---	---	---	---	---	---	---
60S ribosomal protein L32 OS=Saccharomyces cerevisiae (strain ATCC 204508 / S288c) GN=RPL32 PE=1 SV=1	RPL32 YBL092W YBL0838	P38061	11.17	130	14640.1	0	0	Cytoplasm.	cytoplasmic translation; cytosolic large ribosomal subunit; structural constituent of ribosome	0.000892127	0.000767392	0	0	---	0.00273831	0.000160342	0.00146796	0.000582577	1.86539	0.00400888	0.000457039	0.00143305	0.000264549	2.79744	0.000492674	0.00061609	0	0	---	0	0	0	0	---	0.000658197	0.000146792	0	0	---
40S ribosomal protein S8-A OS=Saccharomyces cerevisiae (strain ATCC 204508 / S288c) GN=RPS8A PE=1 SV=1	RPS8A RPS14A YBL072C YBL06.05 YBL0613	P0CX39	10.67	200	22358.5	0	0	Cytoplasm.	90S preribosome; cytoplasmic translation; cytosolic small ribosomal subunit; maturation of SSU-rRNA from tricistronic rRNA transcript (SSU-rRNA, 5.8S rRNA, LSU-rRNA); structural constituent of ribosome; translational elongation	0.000453446	0.000214473	0	0	---	0.00241635	0.000481362	0.00242085	0.000106755	0.998142	0.00332481	0.000989893	0.00159933	0.000148066	2.07888	0.000205536	0.000212914	9.33052e-05	8.08842e-05	2.20283	0.000480252	0.000114693	0	0	---	0.000123849	0.000107467	0	0	---
Phosphoenolpyruvate carboxykinase [ATP] OS=Saccharomyces cerevisiae (strain ATCC 204508 / S288c) GN=PCK1 PE=1 SV=2	PCK1 PEPC PPC1 YKR097W	P10963	5.92	549	60983.2	4	Carbohydrate biosynthesis; gluconeogenesis.	0	ATP binding; cytosol; gluconeogenesis; phosphoenolpyruvate carboxykinase (ATP) activity	---	---	---	---	---	0.000833514	0.000117242	0.000621217	0.000179507	1.34174	0.000645041	0.000370394	0.000719496	0.000168001	0.896518	0.00223191	0.000451362	0.000691751	0.000199135	3.22646	0.0011951	0.000172563	0.00083222	8.59173e-05	1.43603	0.00149328	0.00078192	0.00068376	0.000162403	2.18393
Heat shock protein 26 OS=Saccharomyces cerevisiae (strain ATCC 204508 / S288c) GN=HSP26 PE=1 SV=3	HSP26 YBR072W YBR0714	P15992	5.31	214	23748.4	0	0	0	cytoplasm; mRNA binding; nucleus; protein folding; response to stress; unfolded protein binding	0.00185855	0.000812039	0.00778643	0.00128713	0.238691	0.00279147	0.00066574	0.00194974	0.000152337	1.43171	0.00226835	0.000578648	0.00257287	0.000547473	0.881644	0.00388952	0.000732728	0.00897724	0.000767919	0.433265	0.00598553	0.000491612	0.00863949	0.000305423	0.692811	0.00524934	0.000807233	0.00884655	0.000125108	0.593377
EH domain-containing and endocytosis protein 1 OS=Saccharomyces cerevisiae (strain ATCC 204508 / S288c) GN=EDE1 PE=1 SV=2	EDE1 BUD15 YBL047C YBL0501 YBL0520	P34216	4.61	1381	150783	0	0	Cytoplasm.	actin cortical patch; calcium ion binding; cellular bud neck; cellular bud tip; endocytosis; endoplasmic reticulum unfolded protein response; mating projection tip; ubiquitin binding	9.3554e-06	1.6204e-05	0.000477984	9.25638e-05	0.0195726	9.29073e-06	1.6092e-05	0.000110016	1.13896e-05	0.0844489	3.84599e-05	6.66144e-05	0.000256702	7.91053e-05	0.149823	9.28359e-06	1.60797e-05	0.000434352	5.64204e-05	0.0213734	6.89516e-05	5.97735e-05	0.000613446	0.000124709	0.1124	6.95386e-05	6.58013e-05	0.000550412	5.09855e-05	0.126339
Glyceraldehyde-3-phosphate dehydrogenase 1 OS=Saccharomyces cerevisiae (strain ATCC 204508 / S288c) GN=TDH1 PE=1 SV=3	TDH1 GPD1 SSS2 YJL052W J1154	P00360	8.29	332	35749.9	1	Carbohydrate degradation; glycolysis; pyruvate from D-glyceraldehyde 3-phosphate: step 1/5.	Cytoplasm.	NAD binding; NADP binding; fungal-type cell wall; gluconeogenesis; glyceraldehyde-3-phosphate dehydrogenase (NAD+) (phosphorylating) activity; glycolysis; lipid particle; mitochondrion; plasma membrane	0.034028	0.00428635	0.00296824	0.000844804	11.464	0.0102609	0.000679842	0.00951663	0.000450597	1.07821	0.0117368	0.000651668	0.00715026	0.000100207	1.64146	0.0115361	0.00276409	0.00181608	0.00122918	6.3522	0.00684095	0.000160664	0.00176025	0.000473347	3.88635	0.00923546	0.001678	0.00141302	0.000146363	6.53598
Fumarate reductase OS=Saccharomyces cerevisiae (strain ATCC 204508 / S288c) GN=YEL047C PE=1 SV=1	YEL047C SYGP-ORF35	P32614	5.93	470	50844.1	1	0	Mitochondrion. Cytoplasm.	cellular response to anoxia; cytosol; fumarate reductase (NADH) activity; mitochondrion; plasma membrane; succinate dehydrogenase activity	0.000789939	0.000367349	0	0	---	0.0011629	0.000257342	0.000528654	0.000191619	2.19975	0.000477856	0.00016304	0.000571642	3.89845e-05	0.835937	0.000229243	0.00019934	3.86873e-05	6.70084e-05	5.92555	0.000306686	8.38349e-05	0	0	---	0.000295087	0.000314364	0	0	---
Malate dehydrogenase, mitochondrial OS=Saccharomyces cerevisiae (strain ATCC 204508 / S288c) GN=MDH1 PE=1 SV=2	MDH1 YKL085W	P17505	6.79	334	33832.8	1	0	Mitochondrion matrix.	L-malate dehydrogenase activity; cellular carbohydrate metabolic process; chronological cell aging; mRNA binding; malate metabolic process; mitochondrial matrix; replicative cell aging; tricarboxylic acid cycle	0.000666858	0.000127912	0.000323451	1.43249e-05	2.0617	0.00258705	0.000714748	0.000565441	0.000185124	4.57527	0.00186389	0.000393293	0.000899181	0.000436168	2.07287	0.00161544	0.000293039	0.00085339	0.000110822	1.89296	0.0012559	0.000191532	0.000572877	0.000123349	2.19226	0.0012923	0.000324443	0.00078757	0.000223314	1.64087
60S ribosomal protein L1-A OS=Saccharomyces cerevisiae (strain ATCC 204508 / S288c) GN=RPL1A PE=1 SV=1	RPL1A SSM1 SSM1A YPL220W	P0CX43	9.73	217	24354.5	0	0	Cytoplasm.	RNA binding; cytoplasmic translation; cytosolic large ribosomal subunit; structural constituent of ribosome	0.000667175	0.000122379	3.93901e-05	6.82256e-05	16.9376	0.00258017	0.000459898	0.001707	0.000343022	1.51153	0.00275387	0.000772621	0.00138598	0.000337335	1.98695	0.000372645	0.000205955	0	0	---	5.3435e-05	9.25522e-05	0	0	---	0.000173286	0.000177561	0	0	---
Peroxiredoxin TSA1 OS=Saccharomyces cerevisiae (strain ATCC 204508 / S288c) GN=TSA1 PE=1 SV=3	TSA1 TPX1 TSA ZRG14 YML028W	P34760	5.03	196	21458.5	1	0	Cytoplasm.	DNA damage checkpoint; DNA protection; cell redox homeostasis; cellular response to oxidative stress; cytosol; polysome; protein folding; replicative cell aging; response to hydroperoxide; ribosome binding; thioredoxin peroxidase activity; unfolded protein binding	0.00347915	0.000622904	0.00117822	0.000497211	2.95289	0.00129771	0.000297675	0.00374935	0.00104859	0.346116	0.00109903	0.000248476	0.00322101	0.000331148	0.341206	0.00290575	0.000508492	0.00332406	0.000941614	0.874155	0.00250315	0.000241267	0.00266345	4.32273e-05	0.939818	0.00276	0.000373479	0.00292506	0.000653413	0.943572
Cystathionine beta-synthase OS=Saccharomyces cerevisiae (strain ATCC 204508 / S288c) GN=CYS4 PE=1 SV=1	CYS4 STR4 YGR155W G6667	P32582	6.25	507	56021.9	4	Amino-acid biosynthesis; L-cysteine biosynthesis; L-cysteine from L-homocysteine and L-serine: step 1/2.	0	cystathionine beta-synthase activity; cysteine biosynthetic process from serine; cysteine biosynthetic process via cystathionine; hydrogen sulfide biosynthetic process; mitochondrion; transsulfuration; traversing start control point of mitotic cell cycle	0.00121953	0.000162709	1.68593e-05	2.92011e-05	72.336	0.00100348	0.00023089	0.000317266	7.99909e-05	3.16289	0.000686504	6.91256e-05	0.00022072	0.000114613	3.11029	0.00087578	0.000481895	3.77496e-05	6.53842e-05	23.1997	0.000380795	0.000221963	1.89149e-05	3.27615e-05	20.132	0.000734325	0.000352049	1.84873e-05	3.2021e-05	39.7205
60S ribosomal protein L18-A OS=Saccharomyces cerevisiae (strain ATCC 204508 / S288c) GN=RPL18A PE=1 SV=1	RPL18A RP28A YOL120C	P0CX49	11.71	186	20431.9	0	0	Cytoplasm.	cytoplasmic translation; cytosolic large ribosomal subunit; structural constituent of ribosome	---	---	---	---	---	0.00150089	0.000582932	0.0015877	0.000279394	0.945321	0.00298134	0.0007324	0.00171338	0.000460138	1.74004	0.000137856	0.000238774	0	0	---	0	0	0	0	---	0	0	0	0	---
40S ribosomal protein S11-A OS=Saccharomyces cerevisiae (strain ATCC 204508 / S288c) GN=RPS11A PE=1 SV=1	RPS11A RPS18A YDR025W YD9813.03	P0CX47	10.79	156	17617.7	0	0	Cytoplasm.	90S preribosome; cytoplasmic translation; cytosolic small ribosomal subunit; maturation of SSU-rRNA from tricistronic rRNA transcript (SSU-rRNA, 5.8S rRNA, LSU-rRNA); rRNA binding; ribosomal small subunit assembly; structural constituent of ribosome	0.000244917	0.000424209	0	0	---	0.00317659	0.000467956	0.00249194	0.000213934	1.27474	0.00407732	0.000312769	0.00211318	0.000227498	1.92947	---	---	---	---	---	---	---	---	---	---	---	---	---	---	---
Heat shock protein 60, mitochondrial OS=Saccharomyces cerevisiae (strain ATCC 204508 / S288c) GN=HSP60 PE=1 SV=1	HSP60 MIF4 YLR259C L8479.10	P19882	4.91	572	57828.1	0	0	Mitochondrion matrix.	'de novo' protein folding; ATP binding; ATPase activity; DNA replication origin binding; chaperone-mediated protein complex assembly; cytosol; mitochondrial inner membrane; mitochondrial intermembrane space; mitochondrial nucleoid; protein import into mitochondrial intermembrane space; protein maturation; protein refolding; protein stabilization; response to stress; single-stranded DNA binding; u…	6.71175e-05	6.67979e-05	7.58048e-05	9.28169e-05	0.885399	0.000888737	0.00021087	0.000746598	0.0001673	1.19038	0.000440827	0.000467233	0.000722943	0.000141957	0.609767	0.000958416	0.000341504	0.000564841	8.78206e-05	1.69679	0.00125807	0.000255956	0.000671911	0.000117748	1.87238	0.00102213	0.000259764	0.000424945	9.41959e-05	2.40531
Uncharacterized protein YGR130C OS=Saccharomyces cerevisiae (strain ATCC 204508 / S288c) GN=YGR130C PE=1 SV=1	YGR130C	P53278	4.96	816	92698.3	0	0	0	cytoplasm; eisosome	0.00066964	0.000354807	0.0016824	0.00026047	0.398026	4.65551e-05	8.06358e-05	8.1245e-05	1.84382e-05	0.573021	0	0	0.000191922	8.16959e-05	0	0.000127143	6.9236e-05	0.000889588	9.24023e-05	0.142924	0.000791841	9.6085e-05	0.00079432	0.000131195	0.996879	0.000671771	0.000186634	0.000736191	8.45888e-05	0.912496
(DL)-glycerol-3-phosphatase 1 OS=Saccharomyces cerevisiae (strain ATCC 204508 / S288c) GN=RHR2 PE=1 SV=3	RHR2 GPP1 YIL053W	P41277	5.35	250	27815.7	3	0	Cytoplasm. Nucleus.	cytoplasm; glycerol biosynthetic process; glycerol-1-phosphatase activity; nucleus; response to osmotic stress	0.00169428	0.000708978	0.000283963	0.000154653	5.96655	0.00239206	0.00039929	0.00215723	0.00044556	1.10885	0.00275077	0.000882321	0.0032588	0.000677042	0.844104	0.00121035	0.000285349	3.63661e-05	6.29879e-05	33.2825	0.00100555	0.000387574	7.67187e-05	0.000132881	13.107	0.00147573	0.000200133	7.36173e-05	0.000127509	20.046
Myosin tail region-interacting protein MTI1 OS=Saccharomyces cerevisiae (strain ATCC 204508 / S288c) GN=BBC1 PE=1 SV=2	BBC1 MTI1 YJL020C J1286 J1305 YJL021C	P47068	5.17	1157	128297	0	0	Cytoplasm â€º cytoskeleton â€º actin patch.	actin cortical patch; actin cytoskeleton organization	0	0	0.000355072	7.94546e-05	0	0.000153906	1.95797e-05	0.000188615	9.55053e-06	0.815976	1.14765e-05	1.98778e-05	0.000276089	4.98071e-05	0.041568	0	0	0.000309978	3.48543e-05	0	0.000113198	4.53702e-05	0.000236547	3.84501e-05	0.478545	0.000156677	0.000109513	0.000259315	5.6456e-05	0.604194
Elongator complex protein 1 OS=Saccharomyces cerevisiae (strain ATCC 204508 / S288c) GN=IKI3 PE=1 SV=1	IKI3 ELP1 TOT1 YLR384C L3502.7	Q06706	4.95	1349	152990	0	0	Cytoplasm. Nucleus.	Elongator holoenzyme complex; cytoplasm; nucleus; protein transport; regulation of transcription from RNA polymerase II promoter; tRNA wobble uridine modification; transcription, DNA-dependent	---	---	---	---	---	9.37945e-06	1.62457e-05	4.14213e-05	5.46141e-05	0.22644	5.89588e-05	3.77636e-05	4.59944e-05	2.1481e-06	1.28187	---	---	---	---	---	---	---	---	---	---	---	---	---	---	---
78 kDa glucose-regulated protein homolog OS=Saccharomyces cerevisiae (strain ATCC 204508 / S288c) GN=KAR2 PE=1 SV=1	KAR2 GRP78 SSD1 YJL034W J1248	P16474	4.71	682	69825.4	0	0	Endoplasmic reticulum lumen.	ATP binding; ATPase activity; ER-associated protein catabolic process; SRP-dependent cotranslational protein targeting to membrane, translocation; karyogamy involved in conjugation with cellular fusion; luminal surveillance complex; posttranslational protein targeting to membrane, translocation; response to unfolded protein; unfolded protein binding	0.000463091	7.38622e-05	0.000218538	0.000207795	2.11904	0.000838505	0.000106661	0.000655214	0.000102596	1.27974	0.000475777	7.26697e-05	0.000867797	0.00015561	0.548259	0.000489195	0.000119768	0.000408434	0.000156669	1.19773	0.000298871	6.69805e-05	0.000391498	7.63096e-05	0.763404	0.00021592	8.61137e-06	0.000357942	5.39591e-05	0.603227
Protein disulfide-isomerase OS=Saccharomyces cerevisiae (strain ATCC 204508 / S288c) GN=PDI1 PE=1 SV=2	PDI1 MFP1 TRG1 YCL043C YCL313 YCL43C	P17967	4.37	522	55345.8	5	0	Endoplasmic reticulum lumen.	cell redox homeostasis; electron carrier activity; endoplasmic reticulum lumen; glycerol ether metabolic process; protein disulfide isomerase activity; protein disulfide oxidoreductase activity	0.000401583	3.45279e-05	0.00212463	0.000372464	0.189014	0.000243452	0.000110706	0.00163689	0.000130421	0.148728	0.000230111	0.000133191	0.00160954	0.000228532	0.142967	0.0009008	0.000289048	0.00266602	0.000121285	0.337882	0.00189937	0.000270315	0.00245918	0.000152904	0.772357	0.00194759	0.000302392	0.00267552	0.000124487	0.727931
Acetyl-CoA acetyltransferase OS=Saccharomyces cerevisiae (strain ATCC 204508 / S288c) GN=ERG10 PE=1 SV=3	ERG10 YPL028W LPB3	P41338	6.99	398	41597.5	2	Metabolic intermediate biosynthesis; (R)-mevalonate biosynthesis; (R)-mevalonate from acetyl-CoA: step 1/3.	Cytoplasm.	acetyl-CoA C-acetyltransferase activity; cytoplasm; ergosterol biosynthetic process; metal ion binding; nucleus	0.00157484	0.000769602	0	0	---	0.00105467	0.000255173	0.00105119	0.00012275	1.00331	0.000960557	0.000220296	0.000839244	0.000283414	1.14455	0.00164446	0.000450851	6.91739e-05	6.77432e-05	23.7729	0.00105428	0.000164557	9.18961e-05	3.88078e-05	11.4725	0.00119141	0.000811218	4.71008e-05	8.1581e-05	25.2948
Ubiquitin-activating enzyme E1 1 OS=Saccharomyces cerevisiae (strain ATCC 204508 / S288c) GN=UBA1 PE=1 SV=2	UBA1 YKL210W	P22515	4.97	1024	114266	0	Protein modification; protein ubiquitination.	Cytoplasm. Nucleus.	ATP binding; cytoplasm; ligase activity; nucleus; protein ubiquitination; ubiquitin activating enzyme activity	6.70052e-05	0.000116056	0	0	---	7.41577e-05	7.41379e-05	0.000360871	4.64365e-05	0.205496	0.000100696	2.93372e-05	0.000193679	6.97477e-05	0.519913	0	0	0	0	---	1.13236e-05	1.96131e-05	0	0	---	2.50648e-05	4.34134e-05	8.98649e-06	1.55651e-05	2.78916
ATP synthase subunit alpha, mitochondrial OS=Saccharomyces cerevisiae (strain ATCC 204508 / S288c) GN=ATP1 PE=1 SV=5	ATP1 YBL099W YBL0827	P07251	6.73	545	54944.7	0	0	Mitochondrion inner membrane.	ATP binding; ATP hydrolysis coupled proton transport; ATP synthesis coupled proton transport; cytosol; integral to membrane; mitochondrial intermembrane space; mitochondrial nucleoid; mitochondrial proton-transporting ATP synthase, catalytic core; proton-transporting ATP synthase activity, rotational mechanism; proton-transporting ATPase activity, rotational mechanism	0.000145642	0.000126393	3.27309e-05	2.84195e-05	4.44969	0.000326713	0.000106868	0.000347883	5.34158e-05	0.939146	0.000670515	0.000189563	0.0002067	5.43797e-05	3.24391	7.03683e-05	7.02665e-05	0.000100155	8.45243e-05	0.702595	0.000240705	9.97826e-05	1.62626e-05	2.81676e-05	14.8011	0.000133454	6.32439e-05	5.25768e-05	9.10656e-05	2.53827
60S ribosomal protein L27-A OS=Saccharomyces cerevisiae (strain ATCC 204508 / S288c) GN=RPL27A PE=1 SV=1	RPL27A RPL27 YHR010W	P0C2H6	10.36	136	15400.1	0	0	Cytoplasm.	cytoplasmic translation; cytosolic large ribosomal subunit; structural constituent of ribosome	0.000774991	0.000186471	0	0	---	0.00383242	0.000307683	0.0023746	0.000119609	1.61392	0.00611387	0.000991683	0.00227331	0.000346281	2.68942	0.00067811	0.000424242	0	0	---	0.000437895	0.000146357	0	0	---	0.0010066	0.000612992	0.000279613	0.000322277	3.59999
UTP--glucose-1-phosphate uridylyltransferase OS=Saccharomyces cerevisiae (strain ATCC 204508 / S288c) GN=UGP1 PE=1 SV=1	UGP1 YKL035W YKL248	P32861	6.98	499	55987.9	2	0	0	(1->6)-beta-D-glucan biosynthetic process; UDP-glucose metabolic process; UTP:glucose-1-phosphate uridylyltransferase activity; cytoplasm; glycogen biosynthetic process; metal ion binding; plasma membrane; trehalose biosynthetic process	---	---	---	---	---	0.000636982	0.000191284	0.00106538	4.91249e-05	0.597893	0.000376226	0.000201171	0.000906009	0.00014492	0.415257	---	---	---	---	---	---	---	---	---	---	---	---	---	---	---
Eukaryotic translation initiation factor 3 subunit J OS=Saccharomyces cerevisiae (strain ATCC 204508 / S288c) GN=HCR1 PE=1 SV=1	HCR1 YLR192C L8167.11	Q05775	5.03	265	29564.2	0	0	Cytoplasm.	cytoplasmic translation; eukaryotic 43S preinitiation complex; eukaryotic 48S preinitiation complex; eukaryotic translation initiation factor 3 complex; formation of translation preinitiation complex; maturation of SSU-rRNA from tricistronic rRNA transcript (SSU-rRNA, 5.8S rRNA, LSU-rRNA); regulation of translational initiation; translation initiation factor activity	0.00287512	0.000201799	0.00151657	0.000398541	1.89581	0.00225499	0.000863227	0.000322179	0.000104104	6.99918	0.00152842	0.00128796	0.000823489	0.000231925	1.85603	0.00110875	0.00029861	0.00135296	0.000251499	0.819499	0.00165983	0.000511901	0.000691841	0.000156453	2.39914	0.00161607	0.000254192	0.000494649	5.40235e-05	3.26711
Myosin-2 OS=Saccharomyces cerevisiae (strain ATCC 204508 / S288c) GN=MYO2 PE=1 SV=1	MYO2 CDC66 YOR326W O6167	P19524	5.95	1574	180680	0	0	Bud neck. Bud tip.	ATP binding; Golgi inheritance; actin filament binding; actin filament bundle; budding cell apical bud growth; calmodulin binding; cellular bud neck; cellular bud tip; establishment of mitotic spindle orientation; filamentous actin; incipient cellular bud site; mating projection tip; membrane addition at site of cytokinesis; microfilament motor activity; mitochondrion inheritance; myosin V comple…	---	---	---	---	---	---	---	---	---	---	7.25206e-06	1.25609e-05	2.65046e-05	1.23739e-05	0.273615	---	---	---	---	---	---	---	---	---	---	---	---	---	---	---
Transcriptional modulator WTM1 OS=Saccharomyces cerevisiae (strain ATCC 204508 / S288c) GN=WTM1 PE=1 SV=1	WTM1 YOR230W YOR50-20	Q12363	5.17	437	48382.7	0	0	Cytoplasm. Nucleus.	cytoplasm; maintenance of protein location in nucleus; negative regulation of chromatin silencing at silent mating-type cassette; negative regulation of chromatin silencing at telomere; negative regulation of transcription from RNA polymerase II promoter during meiosis; nucleus; positive regulation of transcription from RNA polymerase II promoter; protein import into nucleus; transcription corepr…	0.00137444	0.000224989	3.91196e-05	6.77572e-05	35.1343	0.00119432	0.000276599	0.000563755	8.85819e-05	2.11851	0.001146	0.000203258	0.00124519	0.000345335	0.920341	0.0009162	0.00023526	0.00010545	9.51693e-05	8.6885	0.000466124	5.90516e-05	0.000148318	7.59498e-05	3.14273	0.000599221	0.000398577	4.25062e-05	3.68162e-05	14.0972
V-type proton ATPase subunit E OS=Saccharomyces cerevisiae (strain ATCC 204508 / S288c) GN=VMA4 PE=1 SV=4	VMA4 VAT5 YOR332W O6241	P22203	5.32	233	26340.2	0	0	Vacuole membrane; Peripheral membrane protein.	ATP hydrolysis coupled proton transport; fungal-type vacuole membrane; integral to membrane; proton-transporting ATPase activity, rotational mechanism; vacuolar acidification; vacuolar proton-transporting V-type ATPase, V1 domain	0.000448119	8.21297e-05	0.00126601	0.000243573	0.353961	0.00131123	0.000295114	0.000812132	0.000166489	1.61455	0.000787684	0.000661046	0.00173935	0.000419514	0.452862	0.00067045	0.000310735	0.00182059	0.000131045	0.36826	0.00220427	0.000293451	0.00121265	0.000251047	1.81773	0.00218987	0.00076511	0.00128238	0.00040086	1.70766
Asparagine synthetase [glutamine-hydrolyzing] 2 OS=Saccharomyces cerevisiae (strain ATCC 204508 / S288c) GN=ASN2 PE=1 SV=2	ASN2 YGR124W G6358	P49090	5.54	572	64462	6	Amino-acid biosynthesis; L-asparagine biosynthesis; L-asparagine from L-aspartate (L-Gln route): step 1/1.	0	ATP binding; L-asparagine biosynthetic process; asparagine biosynthetic process; asparagine synthase (glutamine-hydrolyzing) activity; cytoplasm; glutamine metabolic process	0.000421363	0.000336728	0	0	---	0.000977928	7.36413e-05	0.00131442	0.000161838	0.744	0.000753179	0.000170284	0.00101701	0.000250499	0.740579	0.000121415	0.000155952	0	0	---	6.29645e-05	6.40662e-05	0	0	---	0.000173404	0.000103781	0	0	---
RNA polymerase II degradation factor 1 OS=Saccharomyces cerevisiae (strain ATCC 204508 / S288c) GN=DEF1 PE=1 SV=1	DEF1 RIP1 VID31 YKL054C YKL308	P35732	4.92	738	83972.9	0	0	Nucleus. Chromosome â€º telomere.	DNA binding; chromosome, telomeric region; nucleus; telomere maintenance; transcription-coupled nucleotide-excision repair; ubiquitin-dependent protein catabolic process	0.000199099	0.000176153	0.000557343	0.000126964	0.357228	0.00015508	5.15307e-05	0.000241312	0.000230641	0.642656	0.000183279	0.000173083	0.000674826	0.000102009	0.271594	0.000791595	0.000452725	0.00123746	0.000107674	0.639692	0.00113174	0.000260383	0.00126901	0.000118664	0.891831	0.00132005	0.000342229	0.001285	0.00017822	1.02728
Methionine--tRNA ligase, cytoplasmic OS=Saccharomyces cerevisiae (strain ATCC 204508 / S288c) GN=MES1 PE=1 SV=4	MES1 YGR264C	P00958	6.15	751	85546.9	6	0	Cytoplasm.	ATP binding; methionine-tRNA ligase activity; methionyl glutamyl tRNA synthetase complex; methionyl-tRNA aminoacylation	---	---	---	---	---	0.000203176	1.59409e-06	0.000250318	0.000149061	0.811673	0.000250472	0.000181601	0.000133353	0.000137027	1.87827	5.28644e-05	5.10952e-05	1.27424e-05	2.20704e-05	4.14871	3.21609e-05	5.57043e-05	1.27694e-05	2.21173e-05	2.51859	1.70881e-05	2.95974e-05	0	0	---
60S ribosomal protein L35-A OS=Saccharomyces cerevisiae (strain ATCC 204508 / S288c) GN=RPL35A PE=1 SV=1	RPL35A SOS1 YDL191W D1249	P0CX84	10.58	120	13778.4	0	0	Cytoplasm.	cytoplasmic translation; cytosolic large ribosomal subunit; maturation of LSU-rRNA from tricistronic rRNA transcript (SSU-rRNA, 5.8S rRNA, LSU-rRNA); preribosome, large subunit precursor; structural constituent of ribosome	0.00107414	0.000788917	7.12304e-05	0.000123375	15.0797	0.00275422	0.000654631	0.00222542	0.000654727	1.23762	0.00361916	0.000745734	0.00223271	0.000337255	1.62097	0.00155062	0.000519332	0.000452731	0.000454587	3.42503	0.0009988	0.000193286	0.000297085	0.000337937	3.36201	0.000906318	0.000507077	0.000710475	0.000636756	1.27565
Multisite-specific tRNA:(cytosine-C(5))-methyltransferase OS=Saccharomyces cerevisiae (strain ATCC 204508 / S288c) GN=NCL1 PE=1 SV=1	NCL1 TRM4 YBL024W YBL0437	P38205	7.01	684	77878.6	2	0	Nucleus â€º nucleolus.	nucleolus; nucleus; tRNA (cytosine-5-)-methyltransferase activity; tRNA binding	7.7902e-05	6.75569e-05	0	0	---	0.000111294	5.51727e-05	0.000110508	4.54934e-05	1.00712	9.36051e-05	9.05195e-05	8.962e-05	4.14654e-05	1.04447	---	---	---	---	---	---	---	---	---	---	---	---	---	---	---
Bifunctional purine biosynthetic protein ADE5,7 OS=Saccharomyces cerevisiae (strain ATCC 204508 / S288c) GN=ADE5,7 PE=1 SV=1	ADE5,7 YGL234W	P07244	5.08	802	86068	6	Purine metabolism; IMP biosynthesis via de novo pathway; 5-amino-1-(5-phospho-D-ribosyl)imidazole from N(2)-formyl-N(1)-(5-phospho-D-ribosyl)glycinamide: step 2/2. Purine metabolism; IMP biosynthesis via de novo pathway; N(1)-(5-phospho-D-ribosyl)glycinamide from 5-phospho-alpha-D-ribose 1-diphosphate: step 2/2.	0	'de novo' IMP biosynthetic process; ATP binding; cytoplasm; metal ion binding; phosphoribosylamine-glycine ligase activity; phosphoribosylformylglycinamidine cyclo-ligase activity; purine nucleobase biosynthetic process; purine nucleobase metabolic process	0.000115081	5.80739e-05	1.06579e-05	1.846e-05	10.7977	0.000396498	5.63048e-05	0.000212773	3.19954e-05	1.86348	0.000304792	0.000141033	0.00016674	4.10588e-05	1.82794	---	---	---	---	---	---	---	---	---	---	---	---	---	---	---
rRNA biogenesis protein RRP5 OS=Saccharomyces cerevisiae (strain ATCC 204508 / S288c) GN=RRP5 PE=1 SV=1	RRP5 FMI1 YMR229C YM9959.11C	Q05022	5.86	1729	193134	0	0	Nucleus â€º nucleolus.	90S preribosome; endonucleolytic cleavage in 5'-ETS of tricistronic rRNA transcript (SSU-rRNA, 5.8S rRNA, LSU-rRNA); endonucleolytic cleavage in ITS1 to separate SSU-rRNA from 5.8S rRNA and LSU-rRNA from tricistronic rRNA transcript (SSU-rRNA, 5.8S rRNA, LSU-rRNA); endonucleolytic cleavage in ITS1 upstream of 5.8S rRNA from tricistronic rRNA transcript (SSU-rRNA, 5.8S rRNA, LSU-rRNA); endonucleol…	---	---	---	---	---	1.46361e-05	2.53504e-05	5.44866e-06	9.43735e-06	2.68618	4.15545e-05	2.51649e-05	1.79429e-05	8.37996e-07	2.31594	---	---	---	---	---	---	---	---	---	---	---	---	---	---	---
Glucokinase-1 OS=Saccharomyces cerevisiae (strain ATCC 204508 / S288c) GN=GLK1 PE=1 SV=1	GLK1 HOR3 YCL040W YCL312 YCL40W	P17709	5.79	500	55246.2	2	0	0	ATP binding; cytosol; glucokinase activity; glucose import; glycolysis; mannose metabolic process; plasma membrane	0.00169193	0.000581996	7.33583e-05	0.00012706	23.064	0.000864901	9.17621e-05	0.000835267	0.000158961	1.03548	0.000731353	8.51494e-05	0.000683688	0.000122734	1.06972	0.00019007	0.000135413	0.000111524	5.89409e-05	1.7043	0.000215292	5.81944e-06	3.69059e-05	3.20357e-05	5.83354	0.000220886	8.80944e-06	5.65951e-05	5.62418e-05	3.90292
Acyl-CoA-binding protein OS=Saccharomyces cerevisiae (strain ATCC 204508 / S288c) GN=ACB1 PE=1 SV=3	ACB1 ACB YGR037C	P31787	4.85	87	10061.4	0	0	0	chronological cell aging; cytoplasm; extracellular region; fatty-acyl-CoA binding; lipid binding; long-chain fatty acid transporter activity; nucleus	0.000157732	0.000273199	0.0128603	0.00189619	0.012265	0.00453212	0.0002898	0.00992668	0.000471336	0.456559	0.00252303	0.000547776	0.00819972	0.000483435	0.307697	0.00277417	0.00107943	0.0120574	0.000874054	0.23008	0.0072961	0.000795899	0.0127709	0.00113802	0.571308	0.00590355	0.000642391	0.0135442	0.00251717	0.435872
Ribonucleoside-diphosphate reductase small chain 1 OS=Saccharomyces cerevisiae (strain ATCC 204508 / S288c) GN=RNR2 PE=1 SV=2	RNR2 CRT6 YJL026W J1271	P09938	5.15	399	46147.4	1	Genetic information processing; DNA replication.	Nucleus.	DNA replication; deoxyribonucleoside diphosphate metabolic process; deoxyribonucleotide biosynthetic process; nucleus; ribonucleoside-diphosphate reductase activity, thioredoxin disulfide as acceptor; ribonucleoside-diphosphate reductase complex; transition metal ion binding	0.00117487	0.000314823	8.88092e-05	7.70531e-05	13.2292	0.000318526	5.37367e-05	0.000879572	6.08233e-05	0.362138	0.000812312	0.000111347	0.000829263	0.000127089	0.979559	0.00126672	0.000194843	0.00028126	0.000195759	4.50374	0.000988892	8.95898e-05	0.000208692	7.76581e-05	4.73852	0.000929137	0.000285808	0.000212354	7.44459e-05	4.37541
Pentafunctional AROM polypeptide OS=Saccharomyces cerevisiae (strain ATCC 204508 / S288c) GN=ARO1 PE=1 SV=1	ARO1 AROM YDR127W YD9302.02	P08566	5.89	1588	174755	4	Metabolic intermediate biosynthesis; chorismate biosynthesis; chorismate from D-erythrose 4-phosphate and phosphoenolpyruvate: step 2/7. Metabolic intermediate biosynthesis; chorismate biosynthesis; chorismate from D-erythrose 4-phosphate and phosphoenolpyruvate: step 3/7. Metabolic intermediate biosynthesis; chorismate biosynthesis; chorismate from D-erythrose 4-phosphate and phosphoenolpyruvate…	Cytoplasm.	3-dehydroquinate dehydratase activity; 3-dehydroquinate synthase activity; 3-phosphoshikimate 1-carboxyvinyltransferase activity; ATP binding; aromatic amino acid family biosynthetic process; chorismate biosynthetic process; cytoplasm; metal ion binding; shikimate 3-dehydrogenase (NADP+) activity; shikimate kinase activity	---	---	---	---	---	3.997e-05	2.7538e-05	0	0	---	8.55627e-05	2.75122e-05	3.94426e-05	3.48106e-05	2.1693	---	---	---	---	---	---	---	---	---	---	---	---	---	---	---
RNA-binding protein SRO9 OS=Saccharomyces cerevisiae (strain ATCC 204508 / S288c) GN=SRO9 PE=1 SV=2	SRO9 YCL037C YCL37C	P25567	8.88	434	48059.9	0	0	Cytoplasm.	RNA binding; cytoplasm; cytoplasmic translation; polysome	0	0	0.000287437	0.000194548	0	0.00017579	1.37922e-06	0.000636476	0.000116011	0.276192	5.00319e-05	4.35001e-05	0.000547213	3.29818e-05	0.0914303	0	0	0.000297252	9.6437e-05	0	5.48515e-05	4.75503e-05	0.000256021	0.000136565	0.214246	2.7504e-05	4.76383e-05	0.000238834	0.000102966	0.11516
Alanine/arginine aminopeptidase OS=Saccharomyces cerevisiae (strain ATCC 204508 / S288c) GN=AAP1 PE=1 SV=2	AAP1 YHR047C	P37898	5.15	856	97662.6	3	0	0	aminopeptidase activity; cytoplasm; glycogen metabolic process; metallopeptidase activity; nucleus; proteolysis; zinc ion binding	0.000616585	0.000162271	0	0	---	0.000207449	0.000135086	0.000565057	0.000139754	0.367129	0.000172066	3.987e-05	0.000336242	0.000131285	0.511733	0.000217052	0.000158809	0	0	---	8.32744e-05	3.98455e-05	0	0	---	0.000215959	5.08447e-05	0	0	---
Isocitrate dehydrogenase [NADP], mitochondrial OS=Saccharomyces cerevisiae (strain ATCC 204508 / S288c) GN=IDP1 PE=1 SV=1	IDP1 YDL066W	P21954	8.43	428	46381.2	1	0	Mitochondrion.	NAD binding; glutamate biosynthetic process; glyoxylate cycle; isocitrate dehydrogenase (NADP+) activity; isocitrate metabolic process; magnesium ion binding; mitochondrial nucleoid; tricarboxylic acid cycle	0.000209154	0.000224489	0	0	---	0.000267749	0.00015503	0.000599908	0.000120507	0.446316	0.000806519	0.000704195	0.000414142	0.000127622	1.94745	9.27597e-05	8.96553e-05	0	0	---	0	0	0	0	---	0.000119936	0.000207735	0	0	---
60S ribosomal protein L23-A OS=Saccharomyces cerevisiae (strain ATCC 204508 / S288c) GN=RPL23A PE=1 SV=1	RPL23A RPL17A RPL17AA YBL087C YBL0713	P0CX41	10.33	137	14341.7	0	0	Cytoplasm.	cytoplasmic translation; cytosolic large ribosomal subunit; structural constituent of ribosome	0.00113849	0.000995467	0	0	---	0.00111513	0.00048592	0.000552676	0.00010739	2.0177	0.00268277	0.000223547	0.000733311	0.000675197	3.65844	0.000870991	0.000286702	0.000139701	0.000241969	6.23468	0.000608462	0.000132776	0.000136136	0.00011804	4.4695	0.000624566	0.000139291	6.84165e-05	0.000118501	9.12888
ATP-dependent RNA helicase DED1 OS=Saccharomyces cerevisiae (strain ATCC 204508 / S288c) GN=DED1 PE=1 SV=2	DED1 SPP81 YOR204W	P06634	7.67	604	65552.8	3	0	Cytoplasm.	ATP binding; ATP-dependent RNA helicase activity; RNA strand annealing activity; cytoplasm; translation initiation factor activity; translational initiation	---	---	---	---	---	0.000483747	0.000129005	4.86271e-05	8.42246e-05	9.94809	0.000960824	0.000211222	1.62101e-05	2.80767e-05	59.2732	---	---	---	---	---	---	---	---	---	---	---	---	---	---	---
GU4 nucleic-binding protein 1 OS=Saccharomyces cerevisiae (strain ATCC 204508 / S288c) GN=ARC1 PE=1 SV=2	ARC1 G4P1 YGL105W G3085	P46672	7.69	376	42084	0	0	0	DNA binding; enzyme activator activity; methionyl glutamyl tRNA synthetase complex; phosphatidylinositol-3,5-bisphosphate binding; phosphatidylinositol-3-phosphate binding; positive regulation of ligase activity; tRNA aminoacylation for protein translation; tRNA binding	0.000523646	2.09366e-05	9.2587e-05	0.000103673	5.65572	0.000913132	0.000202476	0.000683268	0.000229233	1.33642	0.00079235	0.000188703	0.000851545	9.12495e-05	0.930486	0.000838409	0.000170929	0.000319219	8.87708e-05	2.62644	0.000415476	0.000119478	0.000363061	0.000138501	1.14437	0.000417097	0.000289711	0.00029922	5.57404e-06	1.39395
Malate synthase 1, glyoxysomal OS=Saccharomyces cerevisiae (strain ATCC 204508 / S288c) GN=MLS1 PE=1 SV=1	MLS1 YNL117W N1921	P30952	6.72	554	62791.1	2	Carbohydrate metabolism; glyoxylate cycle; (S)-malate from isocitrate: step 2/2.	Glyoxysome.	cytosol; glyoxylate cycle; glyoxysome; malate synthase activity; peroxisomal matrix; tricarboxylic acid cycle	---	---	---	---	---	0.000160249	7.86092e-05	0.000412252	6.06094e-05	0.388716	0.0004737	0.000348006	0.000203627	7.9296e-05	2.32631	7.4301e-05	7.68547e-05	0	0	---	6.39006e-05	6.28204e-05	0	0	---	0.000182275	0.000203245	0	0	---
Translation initiation factor RLI1 OS=Saccharomyces cerevisiae (strain ATCC 204508 / S288c) GN=RLI1 PE=1 SV=1	RLI1 YDR091C	Q03195	8.89	608	68340.4	0	0	Cytoplasm. Nucleus.	ATP binding; ATPase activity; cytosolic ribosome; electron carrier activity; iron ion binding; iron-sulfur cluster binding; nucleus; rRNA processing; ribosomal large subunit biogenesis; ribosomal subunit export from nucleus; translation initiation factor activity; translational initiation; translational termination	---	---	---	---	---	0.000146584	3.75344e-05	6.13399e-05	6.99611e-05	2.3897	0.000306943	0.000189843	0.000154822	9.45009e-05	1.98255	---	---	---	---	---	---	---	---	---	---	---	---	---	---	---
Aromatic/aminoadipate aminotransferase 1 OS=Saccharomyces cerevisiae (strain ATCC 204508 / S288c) GN=ARO8 PE=1 SV=1	ARO8 YGL202W	P53090	5.68	500	56177.9	2	Amino-acid biosynthesis; L-phenylalanine biosynthesis; L-phenylalanine from phenylpyruvate (ArAT route): step 1/1. Amino-acid biosynthesis; L-tyrosine biosynthesis; L-tyrosine from (4-hydroxyphenyl)pyruvate: step 1/1. Amino-acid biosynthesis; L-methionine biosynthesis via salvage pathway; L-methionine from S-methyl-5-thio-alpha-D-ribose 1-phosphate: step 6/6. Amino-acid biosynthesis; L-lysine bio…	Cytoplasm.	2-aminoadipate transaminase activity; L-methionine salvage from methylthioadenosine; L-phenylalanine biosynthetic process; L-phenylalanine:2-oxoglutarate aminotransferase activity; aromatic amino acid family metabolic process; aromatic-amino-acid:2-oxoglutarate aminotransferase activity; cytoplasm; lysine biosynthetic process via aminoadipic acid; pyridoxal phosphate binding; tyrosine biosyntheti…	0.001576	0.000224868	6.98673e-05	7.7895e-05	22.557	0.000636358	0.000121739	0.00119732	0.000155862	0.531486	0.000611223	0.000323614	0.000703585	5.62757e-05	0.868726	0.000706519	0.000494084	0.000237406	0.000134841	2.97599	0.000405469	0.000102914	0.000328712	4.23338e-05	1.23351	0.000647103	0.00037316	0.000280226	9.20527e-05	2.30922
Acetolactate synthase catalytic subunit, mitochondrial OS=Saccharomyces cerevisiae (strain ATCC 204508 / S288c) GN=ILV2 PE=1 SV=1	ILV2 SMR1 YMR108W YM9718.07	P07342	6.61	687	64762.1	2	Amino-acid biosynthesis; L-isoleucine biosynthesis; L-isoleucine from 2-oxobutanoate: step 1/4. Amino-acid biosynthesis; L-valine biosynthesis; L-valine from pyruvate: step 1/4.	Mitochondrion.	acetolactate synthase activity; acetolactate synthase complex; branched-chain amino acid biosynthetic process; flavin adenine dinucleotide binding; isoleucine biosynthetic process; magnesium ion binding; mitochondrion; thiamine pyrophosphate binding; valine biosynthetic process	---	---	---	---	---	5.52674e-05	5.52527e-05	0.000152051	6.24903e-05	0.36348	8.25414e-05	2.18185e-05	0.000211076	9.73823e-05	0.39105	---	---	---	---	---	---	---	---	---	---	---	---	---	---	---
ATP synthase subunit beta, mitochondrial OS=Saccharomyces cerevisiae (strain ATCC 204508 / S288c) GN=ATP2 PE=1 SV=2	ATP2 YJR121W J2041	P00830	5.11	511	51126.4	3	0	Mitochondrion. Mitochondrion inner membrane.	ATP binding; ATP hydrolysis coupled proton transport; ATP synthesis coupled proton transport; cytosol; integral to membrane; mitochondrial intermembrane space; mitochondrial proton-transporting ATP synthase, catalytic core; proton-transporting ATP synthase activity, rotational mechanism; proton-transporting ATPase activity, rotational mechanism	0.000435151	7.73159e-05	5.30901e-05	5.46023e-05	8.19647	0.00109465	3.47181e-05	0.000483561	3.79566e-05	2.26372	0.00093563	0.000251103	0.000622729	0.00012252	1.50247	0.000105643	9.18321e-05	5.33748e-05	9.24479e-05	1.97926	0.000117067	0.000108788	7.29968e-05	6.32934e-05	1.60373	0.00011722	0.000107187	0	0	---
Aspartate-semialdehyde dehydrogenase OS=Saccharomyces cerevisiae (strain ATCC 204508 / S288c) GN=HOM2 PE=1 SV=1	HOM2 YDR158W YD8358.12	P13663	6.27	365	39543.7	1	Amino-acid biosynthesis; L-lysine biosynthesis via DAP pathway; (S)-tetrahydrodipicolinate from L-aspartate: step 2/4. Amino-acid biosynthesis; L-methionine biosynthesis via de novo pathway; L-homoserine from L-aspartate: step 2/3. Amino-acid biosynthesis; L-threonine biosynthesis; L-threonine from L-aspartate: step 2/5.	0	N-acetyl-gamma-glutamyl-phosphate reductase activity; NAD binding; NADP binding; aspartate metabolic process; aspartate-semialdehyde dehydrogenase activity; cytoplasm; homoserine biosynthetic process; isoleucine biosynthetic process; lysine biosynthetic process via diaminopimelate; methionine biosynthetic process; nucleus; plasma membrane; threonine biosynthetic process	0.00120811	0.000552475	0	0	---	0.000836057	0.000103914	0.000703809	9.37133e-05	1.1879	0.000964467	0.00027139	0.000655614	0.000157491	1.47109	0.000808378	0.000440326	0	0	---	0.000195881	0.000198569	0	0	---	0.000351593	0.000608978	0	0	---
Mitochondrial protein import protein MAS5 OS=Saccharomyces cerevisiae (strain ATCC 204508 / S288c) GN=YDJ1 PE=1 SV=1	YDJ1 MAS5 YNL064C N2418 YNL2418C	P25491	5.95	409	44384.4	0	0	Cytoplasm. Cytoplasm â€º perinuclear region.	'de novo' protein folding; ATP binding; ATPase activator activity; ER-associated protein catabolic process; TRC complex; metal ion binding; perinuclear region of cytoplasm; protein refolding; protein targeting to ER; protein targeting to mitochondrion; response to heat; unfolded protein binding	0.000158556	0.000105429	8.69334e-05	3.33102e-05	1.82388	0.000341699	5.14121e-05	0.000531442	0.000149352	0.642966	0.0004493	0.000263527	0.000326958	8.05115e-05	1.37418	0.000316221	0.000189959	0	0	---	0.000117585	5.3322e-05	2.16702e-05	3.75338e-05	5.4261	0.000267577	0.000147511	0	0	---
Calmodulin OS=Saccharomyces cerevisiae (strain ATCC 204508 / S288c) GN=CMD1 PE=1 SV=1	CMD1 YBR109C YBR0904	P06787	4.18	147	16134.9	0	0	Cytoplasm â€º cytoskeleton â€º microtubule organizing center â€º spindle pole body.	NLS-bearing substrate import into nucleus; calcium ion binding; calcium-dependent protein binding; cell budding; cellular bud neck; cellular bud tip; central plaque of spindle pole body; incipient cellular bud site; karyogamy involved in conjugation with cellular fusion; mating projection tip; microautophagy; phosphatidylinositol biosynthetic process; receptor-mediated endocytosis; spindle pole b…	0.000174527	0.000151157	0.0100645	0.00101292	0.0173408	0.000603864	0.000392815	0.00512379	0.0013204	0.117855	0.00116485	0.000420597	0.00579335	0.00104882	0.201067	0.00176884	0.000792133	0.0135211	0.000416935	0.13082	0.00138896	0.000400027	0.013954	0.000221864	0.0995387	0.000840081	0.000524467	0.0182266	0.000818233	0.0460909
Multiprotein-bridging factor 1 OS=Saccharomyces cerevisiae (strain ATCC 204508 / S288c) GN=MBF1 PE=1 SV=2	MBF1 SUF13 YOR298C-A	O14467	10.61	151	16403.6	0	0	Cytoplasm. Nucleus.	mitochondrion; nucleus; positive regulation of transcription from RNA polymerase II promoter; sequence-specific DNA binding; transcription coactivator activity; transcription, DNA-dependent	0.000520346	0.000252124	0.000235469	9.02243e-05	2.20983	0.00260907	0.0005731	0.000311088	0.000390033	8.38692	0.00183748	0.000964019	0.000816864	0.000174645	2.24943	0.00129819	0.000392809	0.000118951	0.00020603	10.9136	0.000873725	0.000158232	0.000239597	0.000267529	3.64664	0.0005555	0.000494716	0.000121883	0.000211108	4.55765
40S ribosomal protein S20 OS=Saccharomyces cerevisiae (strain ATCC 204508 / S288c) GN=RPS20 PE=1 SV=3	RPS20 URP2 YHL015W	P38701	9.52	121	13775.9	0	0	Cytoplasm.	RNA binding; cytoplasmic translation; cytosolic small ribosomal subunit; maturation of SSU-rRNA from tricistronic rRNA transcript (SSU-rRNA, 5.8S rRNA, LSU-rRNA); structural constituent of ribosome	0.00183923	0.000120354	0.000298991	0.000135162	6.15144	0.00284019	0.000570749	0.00336831	0.00069665	0.843208	0.00318931	0.00105678	0.00239329	0.000417328	1.33261	0.00229998	0.000138184	0.000149358	0.000129355	15.3991	0.00168344	0.000213269	7.48831e-05	0.000129701	22.4809	0.00132306	0.000232003	7.74633e-05	0.00013417	17.0799
Dihydroxy-acid dehydratase, mitochondrial OS=Saccharomyces cerevisiae (strain ATCC 204508 / S288c) GN=ILV3 PE=1 SV=2	ILV3 YJR016C J1450	P39522	UNDEFINED	585	0	4	Amino-acid biosynthesis; L-isoleucine biosynthesis; L-isoleucine from 2-oxobutanoate: step 3/4. Amino-acid biosynthesis; L-valine biosynthesis; L-valine from pyruvate: step 3/4.	Mitochondrion.	4 iron, 4 sulfur cluster binding; branched-chain amino acid biosynthetic process; dihydroxy-acid dehydratase activity; isoleucine biosynthetic process; metal ion binding; mitochondrion; valine biosynthetic process	---	---	---	---	---	0.000260509	0.00011156	0.00055056	8.99904e-05	0.473171	0.000525598	0.000214714	0.000459268	3.13209e-05	1.14443	8.97808e-05	3.57984e-05	0	0	---	8.25738e-05	0.000143022	0	0	---	2.05889e-05	3.56611e-05	0	0	---
Protein MMF1, mitochondrial OS=Saccharomyces cerevisiae (strain ATCC 204508 / S288c) GN=MMF1 PE=1 SV=1	MMF1 IBM1 YIL051C	P40185	7.02	145	13939.9	0	0	Mitochondrion matrix.	deaminase activity; isoleucine biosynthetic process; mitochondrial matrix; mitochondrial translation	0.0043341	0.000430669	0.00789253	0.00312473	0.54914	0.00193017	0.000550626	0.00464921	0.000161657	0.415162	0.00188951	0.000241256	0.00514111	0.000443501	0.367529	0.00571717	0.00194594	0.0163341	0.000824501	0.350015	0.00685081	0.000630449	0.01843	0.00140836	0.37172	0.00640788	0.000825543	0.0190052	0.00167995	0.337165
Nicotinate phosphoribosyltransferase OS=Saccharomyces cerevisiae (strain ATCC 204508 / S288c) GN=NPT1 PE=1 SV=3	NPT1 YOR209C	P39683	6.44	429	49018.6	6	Cofactor biosynthesis; NAD(+) biosynthesis; nicotinate D-ribonucleotide from nicotinate: step 1/1.	Cytoplasm. Nucleus.	NAD biosynthetic process; chromatin silencing at rDNA; chromatin silencing at telomere; cytoplasm; nicotinate nucleotide salvage; nicotinate phosphoribosyltransferase activity; nicotinate-nucleotide diphosphorylase (carboxylating) activity; nucleus; replicative cell aging	0.000119606	0.00010359	0	0	---	2.99079e-05	5.18021e-05	0.000444879	0.000160532	0.0672271	5.0615e-05	4.40071e-05	0.000315931	9.57593e-05	0.160209	---	---	---	---	---	---	---	---	---	---	---	---	---	---	---
Elongation factor 1-gamma 1 OS=Saccharomyces cerevisiae (strain ATCC 204508 / S288c) GN=CAM1 PE=1 SV=2	CAM1 TEF3 YPL048W	P29547	8.43	415	47087.7	0	Protein biosynthesis; polypeptide chain elongation.	Cytoplasm. Nucleus.	calcium ion binding; eukaryotic translation elongation factor 1 complex; nucleus; phospholipid binding; positive regulation of transcription from RNA polymerase II promoter; ribosome biogenesis; transcription coactivator activity; translation elongation factor activity	0.000123641	0.000107085	0	0	---	0.000274876	0.000241485	0.00137392	8.498e-05	0.200068	0.000673337	0.000261709	0.00104003	0.000177856	0.647421	---	---	---	---	---	---	---	---	---	---	---	---	---	---	---
60S ribosomal protein L16-B OS=Saccharomyces cerevisiae (strain ATCC 204508 / S288c) GN=RPL16B PE=1 SV=3	RPL16B RP23 RPL21B YNL069C N2377	P26785	10.54	198	22117.9	0	0	Cytoplasm.	RNA binding; cytoplasmic translation; cytosolic large ribosomal subunit; structural constituent of ribosome	0.000462081	0.000101893	8.63398e-05	0.000149545	5.35189	0.00237396	0.000606248	0.00187006	0.000275442	1.26946	0.00363234	0.00104362	0.00113492	0.000496598	3.20052	0.000458952	0.000286045	0	0	---	0.000424111	0.000113592	0	0	---	0.000242235	0.000209788	0	0	---
T-complex protein 1 subunit eta OS=Saccharomyces cerevisiae (strain ATCC 204508 / S288c) GN=CCT7 PE=1 SV=1	CCT7 YJL111W J0804	P42943	5.41	550	59735.6	0	0	Cytoplasm.	ATP binding; chaperonin-containing T-complex; protein folding; unfolded protein binding	---	---	---	---	---	0.000161719	3.92656e-05	0.00020776	0.000103601	0.778395	0.000219512	0.000134767	0.00016893	5.71156e-05	1.29942	---	---	---	---	---	---	---	---	---	---	---	---	---	---	---
Putative proline--tRNA ligase YHR020W OS=Saccharomyces cerevisiae (strain ATCC 204508 / S288c) GN=YHR020W PE=1 SV=1	YHR020W	P38708	6.02	688	77386.2	6	0	0	ATP binding; aminoacyl-tRNA editing activity; cytoplasm; proline-tRNA ligase activity; prolyl-tRNA aminoacylation; regulation of translational fidelity	0.000133518	8.57482e-05	1.24239e-05	2.15188e-05	10.7469	0.000221781	1.74006e-06	0.000109865	4.52289e-05	2.01867	0.000215169	0.000108346	7.46386e-05	2.44687e-05	2.88281	9.70181e-05	3.62967e-05	2.61071e-05	4.52188e-05	3.71616	6.97069e-05	3.08688e-05	2.68211e-05	2.32818e-05	2.59896	0.000121763	0.000130928	1.38829e-05	2.40459e-05	8.77068
Zuotin OS=Saccharomyces cerevisiae (strain ATCC 204508 / S288c) GN=ZUO1 PE=1 SV=1	ZUO1 YGR285C	P32527	8.18	433	49020	0	0	Cytoplasm.	DNA binding; mitochondrion; nucleolus; polysome; protein folding; rRNA processing; regulation of translational fidelity; ribosomal subunit export from nucleus; ribosome; unfolded protein binding	5.96758e-05	0.000103362	0	0	---	0.000176606	8.95157e-05	0.000374944	0.000157717	0.471019	0.000529874	0.000124865	0.000311289	5.2311e-05	1.70219	0.000239604	0.000130477	6.4942e-05	6.63434e-05	3.68952	0.000167465	0.000148032	6.52206e-05	6.6476e-05	2.56767	8.34493e-05	0.000144538	0.000107857	3.61156e-05	0.773706
Histone H2B.1 OS=Saccharomyces cerevisiae (strain ATCC 204508 / S288c) GN=HTB1 PE=1 SV=2	HTB1 H2B1 SPT12 YDR224C YD9934.09C	P02293	10.1	131	14121.1	0	0	Nucleus. Chromosome.	DNA binding; chromatin assembly or disassembly; negative regulation of transcription from RNA polymerase II promoter; nuclear nucleosome; nucleosome assembly; postreplication repair; replication fork protection complex	0.00339816	0.0012987	0.000538087	0.000396539	6.31526	0.00184247	0.000323313	0.00282368	0.000322714	0.652508	0.00366951	0.000745961	0.00140711	0.000408551	2.60784	0.00170159	0.000558201	0.000639473	0.000570383	2.66092	0.00109461	0.000273413	0.000272139	0.000309561	4.02226	0.00149543	0.000405728	0.000716977	0.000330111	2.08574
Nuclear localization sequence-binding protein OS=Saccharomyces cerevisiae (strain ATCC 204508 / S288c) GN=NSR1 PE=1 SV=1	NSR1 YGR159C G7001	P27476	4.87	414	44535.2	0	0	Nucleus â€º nucleolus.	RNA binding; mitochondrion; nucleolus; nucleotide binding; rRNA processing; response to stress; ribosomal small subunit assembly; single-stranded DNA binding	0.00130928	0.000919194	0	0	---	0.00030739	0.000107304	0.000824323	0.000167999	0.3729	0.00049274	0.000106131	0.000635861	0.000416426	0.774918	0.00101179	0.000341936	0.000334994	7.67239e-05	3.02031	0.000837737	0.000268583	0.000171268	0.000296644	4.89139	0.000736933	0.000269877	0.000340107	7.05865e-05	2.16677
40S ribosomal protein S25-A OS=Saccharomyces cerevisiae (strain ATCC 204508 / S288c) GN=RPS25A PE=1 SV=1	RPS25A RPS31A YGR027C	Q3E792	10.32	108	11908	0	0	Cytoplasm.	cytoplasmic translation; cytosolic small ribosomal subunit; structural constituent of ribosome	---	---	---	---	---	0.00247236	0.000351166	0.00254725	0.000256859	0.970597	0.00242082	0.000647739	0.00142789	0.00022387	1.69538	---	---	---	---	---	---	---	---	---	---	---	---	---	---	---
Threonine synthase OS=Saccharomyces cerevisiae (strain ATCC 204508 / S288c) GN=THR4 PE=1 SV=1	THR4 YCR053W YCR53W	P16120	5.46	514	57474.2	4	Amino-acid biosynthesis; L-threonine biosynthesis; L-threonine from L-aspartate: step 5/5.	0	cytoplasm; nucleus; pyridoxal phosphate binding; threonine biosynthetic process; threonine synthase activity	0.00110921	0.000503959	4.9889e-05	8.64102e-05	22.2336	0.000519177	7.10015e-05	0.000627796	7.75704e-05	0.826984	0.000222101	8.4139e-05	0.000736289	0.000236049	0.301649	0.000786938	0.000394819	8.96528e-05	8.09124e-05	8.77762	0.00074186	0.000280048	7.05125e-05	0.000122131	10.521	0.000764634	6.4051e-05	1.82355e-05	3.15849e-05	41.931
Tropomyosin-2 OS=Saccharomyces cerevisiae (strain ATCC 204508 / S288c) GN=TPM2 PE=1 SV=1	TPM2 YIL138C	P40414	4.5	161	19092.9	0	0	Cytoplasm â€º cytoskeleton.	actin filament bundle; actin filament bundle assembly; actin lateral binding; actin polymerization or depolymerization; budding cell apical bud growth; budding cell isotropic bud growth; cellular bud neck contractile ring; establishment of cell polarity; exocytosis; intracellular mRNA localization; mitochondrion inheritance; vacuole inheritance	0	0	0.00609218	0.000177113	0	0.000553623	0.000275311	0.00265549	7.23691e-05	0.208482	0.000370715	0.000158696	0.00346014	0.000451247	0.107139	0.00048514	0.000224848	0.00476338	0.000847157	0.101848	0.000739798	0.000247262	0.00573972	0.000360369	0.128891	0.000674847	0.000436497	0.00530355	0.000457235	0.127244
Deoxyhypusine hydroxylase OS=Saccharomyces cerevisiae (strain ATCC 204508 / S288c) GN=LIA1 PE=1 SV=1	LIA1 MMD1 YJR070C J1814	P47120	4.78	325	36033.6	1	Protein modification; eIF5A hypusination.	Cytoplasm. Nucleus.	cytoplasm; deoxyhypusine monooxygenase activity; metal ion binding; microtubule cytoskeleton organization; nucleus; peptidyl-lysine modification to hypusine	0.000287588	0.000199148	2.63004e-05	4.55537e-05	10.9347	0.000313673	0.000181237	0.00163383	0.000221031	0.191986	7.59785e-05	6.63591e-05	0.00175438	0.000282247	0.0433078	0.000126655	0.000131008	0.000112345	0.000126077	1.12738	7.51393e-05	0.000130145	0.0001392	9.20387e-05	0.539794	0	0	0.000114309	9.90072e-05	0
Eukaryotic translation initiation factor 3 subunit C OS=Saccharomyces cerevisiae (strain ATCC 204508 / S288c) GN=NIP1 PE=1 SV=2	NIP1 YMR309C YM9924.01C YM9952.11C	P32497	4.86	812	93204.5	0	0	Cytoplasm.	cytoplasmic stress granule; eukaryotic 43S preinitiation complex; eukaryotic 48S preinitiation complex; eukaryotic translation initiation factor 3 complex; formation of translation preinitiation complex; multi-eIF complex; regulation of translational initiation; translation initiation factor activity	6.27374e-05	0.000108664	0	0	---	9.39566e-05	7.37168e-07	9.43166e-05	4.36217e-05	0.996182	6.47921e-05	7.85824e-05	3.82059e-05	1.78435e-06	1.69586	3.49041e-05	6.04557e-05	0.000148132	0.00012868	0.235629	0.000118881	6.92953e-05	0.000280441	6.02057e-05	0.423909	1.48332e-05	2.56918e-05	0.000229198	0.000140929	0.0647175
40S ribosomal protein S14-A OS=Saccharomyces cerevisiae (strain ATCC 204508 / S288c) GN=RPS14A PE=1 SV=5	RPS14A CRY1 RPL59 YCR031C YCR31C	P06367	10.73	137	14405.4	0	0	Cytoplasm. Nucleus â€º nucleolus.	90S preribosome; cytoplasmic translation; cytosolic small ribosomal subunit; mRNA binding; maturation of SSU-rRNA from tricistronic rRNA transcript (SSU-rRNA, 5.8S rRNA, LSU-rRNA); nucleolus; ribosomal small subunit assembly; small-subunit processome; structural constituent of ribosome	0.000868156	0.000319245	6.69328e-05	0.000115931	12.9706	0.00278441	2.1846e-05	0.00270015	0.000521751	1.03121	0.00386562	0.000551962	0.00189739	0.000590633	2.03733	0.000973212	0.00060477	6.55536e-05	0.000113542	14.8461	0.000172787	0.000149731	0.000134693	0.000116919	1.28282	0.000737869	0.000862515	0	0	---
Heat shock protein 104 OS=Saccharomyces cerevisiae (strain ATCC 204508 / S288c) GN=HSP104 PE=1 SV=2	HSP104 YLL026W L0948	P31539	5.31	908	102035	0	0	Cytoplasm. Nucleus.	ADP binding; ATP binding; ATPase activity, coupled; TRC complex; cellular heat acclimation; chaperone binding; chaperone cofactor-dependent protein refolding; inheritance of oxidatively modified proteins involved in replicative cell aging; nucleus; protein folding in endoplasmic reticulum; protein unfolding; trehalose metabolism in response to heat stress; unfolded protein binding	---	---	---	---	---	0.000181589	0.000104654	9.39061e-05	5.34788e-05	1.93373	0.000193917	5.01804e-05	3.48146e-05	6.03007e-05	5.56997	0.00016102	3.08291e-05	9.12059e-05	2.94763e-05	1.76546	5.22878e-05	2.10748e-05	0.000151508	6.20719e-06	0.345117	9.34854e-05	5.9744e-05	0.00015566	8.50522e-05	0.600573
Farnesyl pyrophosphate synthase OS=Saccharomyces cerevisiae (strain ATCC 204508 / S288c) GN=ERG20 PE=1 SV=2	ERG20 BOT3 FDS1 FPP1 YJL167W J0525	P08524	5.32	352	40483.4	2	Isoprenoid biosynthesis; farnesyl diphosphate biosynthesis; farnesyl diphosphate from geranyl diphosphate and isopentenyl diphosphate: step 1/1. Isoprenoid biosynthesis; geranyl diphosphate biosynthesis; geranyl diphosphate from dimethylallyl diphosphate and isopentenyl diphosphate: step 1/1.	Cytoplasm.	dimethylallyltranstransferase activity; endoplasmic reticulum; ergosterol biosynthetic process; farnesyl diphosphate biosynthetic process; geranyl diphosphate biosynthetic process; geranyltranstransferase activity; metal ion binding	0.00120613	0.000613964	0	0	---	0.000902937	5.95201e-05	0.00126596	0.000139236	0.713243	0.00076776	0.000276988	0.0014659	0.000518503	0.523747	0.00090372	0.000123422	2.58282e-05	4.47357e-05	34.9897	0.000816106	0.000275781	0	0	---	0.000809808	0.00034062	0	0	---
60S ribosomal protein L28 OS=Saccharomyces cerevisiae (strain ATCC 204508 / S288c) GN=RPL28 PE=1 SV=3	RPL28 CYH2 YGL103W	P02406	10.62	149	16590.4	0	0	Cytoplasm.	RNA binding; cytoplasmic translation; cytosolic large ribosomal subunit; nucleus; response to antibiotic; response to cycloheximide; structural constituent of ribosome	0.000263047	0.00025668	0	0	---	0.00161638	0.000960755	0.00281283	0.000479308	0.574646	0.0025699	0.00117531	0.002446	0.0007344	1.05066	0.000619319	0.00013418	0	0	---	0.000239921	0.000243214	0	0	---	0.000166241	0.000144251	0	0	---
Hydroxymethylglutaryl-CoA synthase OS=Saccharomyces cerevisiae (strain ATCC 204508 / S288c) GN=ERG13 PE=1 SV=1	ERG13 HMGS YML126C YM4987.09C	P54839	8.36	491	55013.5	2	Metabolic intermediate biosynthesis; (R)-mevalonate biosynthesis; (R)-mevalonate from acetyl-CoA: step 2/3.	0	ergosterol biosynthetic process; hydroxymethylglutaryl-CoA synthase activity; isoprenoid biosynthetic process; nucleus	0.000506253	0.000177488	0	0	---	0.000828492	8.67333e-05	0.000522709	6.22184e-05	1.585	0.000710125	0.00026738	0.000503307	9.84859e-05	1.41092	0.000193554	0.000137895	0	0	---	0	0	0	0	---	7.84103e-05	0.000135811	0	0	---
Phenylalanine--tRNA ligase beta subunit OS=Saccharomyces cerevisiae (strain ATCC 204508 / S288c) GN=FRS1 PE=1 SV=3	FRS1 YLR060W L2165	P15624	5.53	595	67233.8	6	0	Cytoplasm.	ATP binding; RNA binding; magnesium ion binding; phenylalanine-tRNA ligase activity; phenylalanine-tRNA ligase complex; phenylalanyl-tRNA aminoacylation	0.00011065	3.97238e-05	0	0	---	0.000470362	7.59265e-05	0.00033529	0.000170966	1.40285	0.000246287	0.000106342	0.000536334	5.37111e-05	0.459204	6.67246e-05	6.44916e-05	0	0	---	0	0	0	0	---	0	0	0	0	---
V-type proton ATPase subunit G OS=Saccharomyces cerevisiae (strain ATCC 204508 / S288c) GN=VMA10 PE=1 SV=1	VMA10 YHR039C-A YHR039BC YHR039C-B	P48836	8.96	114	12712.7	0	0	0	fungal-type vacuole membrane; proton-transporting ATPase activity, rotational mechanism; vacuolar acidification; vacuolar proton-transporting V-type ATPase, V1 domain	0.000563428	0.000518323	0.00622381	0.000383575	0.0905278	0.00446084	0.000833264	0.00182954	0.000357604	2.43823	0.00203118	0.00254934	0.00333562	0.000525209	0.608936	0.00251666	0.000947034	0.00684705	0.00105161	0.367555	0.00379979	0.00153341	0.00696204	0.00144613	0.545787	0.00351987	0.00136512	0.00675599	0.00123905	0.521
Aspartate aminotransferase, cytoplasmic OS=Saccharomyces cerevisiae (strain ATCC 204508 / S288c) GN=AAT2 PE=1 SV=3	AAT2 ASP5 YLR027C L1746	P23542	8.45	418	45926.4	2	0	Cytoplasm. Peroxisome.	2-oxoglutarate metabolic process; L-aspartate:2-oxoglutarate aminotransferase activity; L-phenylalanine:2-oxoglutarate aminotransferase activity; aspartate biosynthetic process; cytosol; glutamate metabolic process; peroxisome; pyridoxal phosphate binding	0.00115666	0.000153326	0	0	---	0.000850705	0.000364306	0.000454773	4.43274e-05	1.87061	0.00095141	0.000175343	0.000340423	0.00029541	2.79479	0.000682202	0.000468325	2.28936e-05	3.96529e-05	29.7988	2.88909e-05	5.00406e-05	0	0	---	0.000239177	0.000230777	0	0	---
Acetyl-CoA hydrolase OS=Saccharomyces cerevisiae (strain ATCC 204508 / S288c) GN=ACH1 PE=1 SV=2	ACH1 YBL015W YBL03.18 YBL0304	P32316	6.3	526	58711.9	3	0	Cytoplasm.	acetate CoA-transferase activity; acetate metabolic process; acetyl-CoA hydrolase activity; acetyl-CoA metabolic process; cytosol; mitochondrion	---	---	---	---	---	0.000265057	0.000181234	0.000396726	7.74406e-05	0.66811	0.000315633	0.000159459	0.000181495	0.000159698	1.73907	0.0019844	0.000120191	0.000103562	0.000134897	19.1614	0.00188828	0.000119565	0	0	---	0.00186831	0.000168054	3.63173e-05	6.29034e-05	51.4442
60S ribosomal protein L22-A OS=Saccharomyces cerevisiae (strain ATCC 204508 / S288c) GN=RPL22A PE=1 SV=3	RPL22A YLR061W L2168	P05749	5.9	121	13562.2	0	0	Cytoplasm.	cytoplasmic translation; cytosolic large ribosomal subunit; structural constituent of ribosome	0.00282066	0.000503161	0	0	---	0.00304379	0.000774584	0.00344617	0.000609453	0.883238	0.00187154	0.000601783	0.00425921	0.000523663	0.439409	---	---	---	---	---	---	---	---	---	---	---	---	---	---	---
Thioredoxin reductase 1 OS=Saccharomyces cerevisiae (strain ATCC 204508 / S288c) GN=TRR1 PE=1 SV=3	TRR1 YDR353W D9476.5	P29509	5.68	319	34106.9	1	0	Cytoplasm.	cell redox homeostasis; cellular response to oxidative stress; cytosol; ferrous iron binding; flavin adenine dinucleotide binding; mitochondrial intermembrane space; removal of superoxide radicals; thioredoxin-disulfide reductase activity	0.00107667	0.000304396	2.67951e-05	4.64105e-05	40.1816	0.000917079	0.000419083	0.00054038	0.000253979	1.6971	0.00125759	0.000334077	0.00101023	0.000275842	1.24486	0.000667744	0.000166836	0	0	---	0.000599182	0.000126677	0	0	---	0.000265758	0.000125644	0	0	---
Sphingolipid long chain base-responsive protein PIL1 OS=Saccharomyces cerevisiae (strain ATCC 204508 / S288c) GN=PIL1 PE=1 SV=1	PIL1 YGR086C	P53252	4.54	339	38349.2	0	0	Lipid droplet.	eisosome; eisosome assembly; endocytosis; lipid binding; lipid particle; mitochondrial outer membrane; negative regulation of protein kinase activity; plasma membrane; protein localization; response to heat	0.000153185	0.000171279	0	0	---	0.0010864	0.000252521	0.000559663	3.4723e-05	1.94116	0.000855069	0.000304346	0.000604179	0.000158094	1.41526	0.000150948	0.000130726	2.64921e-05	4.58857e-05	5.69784	3.60181e-05	6.23852e-05	2.82886e-05	4.89973e-05	1.27324	0	0	8.34958e-05	8.45449e-05	0
Potassium-activated aldehyde dehydrogenase, mitochondrial OS=Saccharomyces cerevisiae (strain ATCC 204508 / S288c) GN=ALD4 PE=1 SV=2	ALD4 ALD7 ALDH2 YOR374W O6730	P46367	5.76	519	53975.4	1	0	Mitochondrion matrix.	NADPH regeneration; acetate biosynthetic process; aldehyde dehydrogenase (NAD) activity; aldehyde dehydrogenase [NAD(P)+] activity; ethanol metabolic process; mitochondrial nucleoid; pyruvate metabolic process	4.90778e-05	8.50053e-05	0	0	---	0.000685857	0.000110624	0.000475146	5.43039e-05	1.44347	0.000145358	0.000127477	0.000630557	0.000190999	0.230523	4.9298e-05	4.26937e-05	1.73041e-05	2.99716e-05	2.84892	6.70255e-05	0.000116092	1.74583e-05	3.02386e-05	3.83918	7.24529e-05	7.42404e-05	0	0	---
Spermidine synthase OS=Saccharomyces cerevisiae (strain ATCC 204508 / S288c) GN=SPE3 PE=1 SV=1	SPE3 YPR069C YP9499.24C	Q12074	5.33	293	33324.1	2	Amine and polyamine biosynthesis; spermidine biosynthesis; spermidine from putrescine: step 1/1.	0	cytoplasm; nucleus; pantothenate biosynthetic process; spermidine biosynthetic process; spermidine synthase activity	0.00170032	1.7396e-05	9.25906e-05	9.52279e-05	18.3638	0.00117052	0.000252757	0.00129335	0.00016953	0.905026	0.000854612	0.000151576	0.0015795	0.000199609	0.541065	0.00144421	6.63414e-06	0.000156399	0.000106445	9.23413	0.0012188	0.000286715	6.11739e-05	5.29878e-05	19.9236	0.00146934	0.000237482	0.000160584	5.7502e-05	9.14997
Low specificity L-threonine aldolase OS=Saccharomyces cerevisiae (strain ATCC 204508 / S288c) GN=GLY1 PE=1 SV=2	GLY1 YEL046C SYGP-ORF34	P37303	5.86	387	42815	4	Amino-acid biosynthesis; glycine biosynthesis; glycine from L-allo-threonine: step 1/1. Amino-acid degradation; L-threonine degradation via aldolase pathway; acetaldehyde and glycine from L-threonine: step 1/1.	0	L-allo-threonine aldolase activity; cytosol; glycine biosynthetic process; pyridoxal phosphate binding; threonine catabolic process	0.000368524	0.000198744	0	0	---	0.000655914	0.00024396	0.000638167	0.000111518	1.02781	0.000439581	0.000116196	0.000480164	0.000162344	0.915481	---	---	---	---	---	---	---	---	---	---	---	---	---	---	---
Flavohemoprotein OS=Saccharomyces cerevisiae (strain ATCC 204508 / S288c) GN=YHB1 PE=1 SV=2	YHB1 YHB YGR234W G8572	P39676	5.86	399	44646.3	1	0	Cytoplasm.	cytosol; heme binding; iron ion binding; mitochondrial matrix; nitric oxide dioxygenase activity; nitric oxide reductase activity; nucleus; oxygen binding; oxygen transport; response to toxic substance	0.000689756	0.000253808	0	0	---	0.000797047	0.000200368	0.000950405	0.000165882	0.838639	0.000726151	0.000306299	0.000794868	0.000281988	0.913548	---	---	---	---	---	---	---	---	---	---	---	---	---	---	---
Nucleoporin NUP2 OS=Saccharomyces cerevisiae (strain ATCC 204508 / S288c) GN=NUP2 PE=1 SV=2	NUP2 YLR335W L8300.9	P32499	6.8	720	77880.8	0	0	Nucleus â€º nuclear pore complex. Nucleus membrane; Peripheral membrane protein; Nucleoplasmic side.	NLS-bearing substrate import into nucleus; chromatin silencing at silent mating-type cassette; mRNA export from nucleus in response to heat stress; maintenance of chromatin silencing at telomere; mitochondrion; nuclear membrane; nuclear pore cytoplasmic filaments; nuclear pore nuclear basket; nucleocytoplasmic transporter activity; poly(A)+ mRNA export from nucleus; posttranscriptional tethering …	0	0	0.000147117	9.04319e-05	0	0.000388483	0.000132588	3.94068e-05	3.87324e-05	9.85828	0.000138222	0.000122675	0.000256454	7.59627e-05	0.538975	0.000197283	0.000130813	0.000179533	0.00015836	1.09887	0.000582485	0.000161306	0.000220645	0.000203295	2.63992	0.000353387	0.000175017	0.000312766	4.27192e-05	1.12987
Gamma-glutamyl phosphate reductase OS=Saccharomyces cerevisiae (strain ATCC 204508 / S288c) GN=PRO2 PE=1 SV=1	PRO2 YOR323C O6155	P54885	5.37	456	49740.5	1	Amino-acid biosynthesis; L-proline biosynthesis; L-glutamate 5-semialdehyde from L-glutamate: step 2/2.	0	L-proline biosynthetic process; NADP binding; cytoplasm; glutamate-5-semialdehyde dehydrogenase activity; nucleus; proline biosynthetic process	---	---	---	---	---	0.000251308	0.00014551	0.000459289	8.07182e-05	0.547168	0.000198646	6.38734e-05	0.000544267	2.54192e-05	0.364978	0.000121346	0.00014347	0	0	---	7.97433e-05	7.94517e-05	0	0	---	0	0	0	0	---
Cytochrome c oxidase subunit 4, mitochondrial OS=Saccharomyces cerevisiae (strain ATCC 204508 / S288c) GN=COX4 PE=1 SV=1	COX4 YGL187C G1362	P04037	5.1	155	14172	0	0	Mitochondrion inner membrane.	aerobic respiration; cytochrome-c oxidase activity; integral to membrane; mitochondrial electron transport, cytochrome c to oxygen; mitochondrial intermembrane space; mitochondrial respiratory chain complex IV; zinc ion binding	0.00101103	0.000227787	0.00479658	0.00134725	0.210782	0.00180653	0.000521789	0.00220663	6.01364e-05	0.818684	0.00178049	0.00122124	0.0034094	0.000467976	0.522231	0.0112237	0.000943235	0.0101627	0.000371243	1.1044	0.0146458	0.000618436	0.00807411	0.000939889	1.81392	0.0150632	0.00237855	0.00768525	0.000486112	1.96001
Elongation factor 3B OS=Saccharomyces cerevisiae (strain ATCC 204508 / S288c) GN=HEF3 PE=1 SV=2	HEF3 YEF3B ZRG7 YNL014W N2846	P53978	5.87	1044	115869	0	Protein biosynthesis; polypeptide chain elongation.	0	ATP binding; ATPase activity; cytosolic ribosome; translation elongation factor activity	0.000502124	8.13785e-05	2.635e-05	4.56395e-05	19.056	0.0005851	0.000113774	0.000381843	7.87431e-05	1.53231	0.000640271	4.24036e-05	0.000384723	3.24153e-05	1.66424	0.000114297	3.76228e-05	0	0	---	0	0	1.69791e-05	2.94087e-05	0	8.43288e-05	9.31929e-05	0	0	---
Chorismate synthase OS=Saccharomyces cerevisiae (strain ATCC 204508 / S288c) GN=ARO2 PE=1 SV=1	ARO2 YGL148W	P28777	7.66	376	40838.3	4	Metabolic intermediate biosynthesis; chorismate biosynthesis; chorismate from D-erythrose 4-phosphate and phosphoenolpyruvate: step 7/7.	0	aromatic amino acid family biosynthetic process; chorismate biosynthetic process; chorismate synthase activity; cytoplasm; response to stress; riboflavin reductase (NADPH) activity	0.000567527	0.000365861	0	0	---	0.000945838	0.000204955	0.000403042	0.0001841	2.34675	0.000810186	0.000148279	0.000497456	0.000103546	1.62866	0.00101578	0.000178929	7.35156e-05	2.49624e-06	13.8173	0.000985146	2.86772e-05	0.000240283	0.000147173	4.09994	0.000912943	4.43774e-05	9.83499e-05	0.000112007	9.2826
NADP-specific glutamate dehydrogenase 1 OS=Saccharomyces cerevisiae (strain ATCC 204508 / S288c) GN=GDH1 PE=1 SV=2	GDH1 URE1 YOR375C	P07262	5.56	454	49569.9	1	0	0	ammonia assimilation cycle; cytoplasm; glutamate biosynthetic process; glutamate dehydrogenase (NADP+) activity; nucleus	0.00189367	0.00100717	0	0	---	0.000672116	0.000250717	0.00127554	8.1399e-05	0.526925	0.00106101	0.000160089	0.000727758	0.000100717	1.45792	0.00134476	0.000132963	0.0011753	6.14536e-05	1.14418	0.00113657	0.000264691	0.00149162	0.000113746	0.761965	0.00116225	0.000204393	0.00135989	0.000222469	0.854666
Ubiquitin domain-containing protein DSK2 OS=Saccharomyces cerevisiae (strain ATCC 204508 / S288c) GN=DSK2 PE=1 SV=2	DSK2 SHE4 YMR276W YM8021.02	P48510	4.78	373	39345.6	0	0	Nucleus.	ER-associated protein catabolic process; nucleus; protein binding, bridging; spindle pole body duplication associated with nuclear envelope	0	0	0.00279626	0.000616964	0	0.000170589	5.95495e-05	0.000838866	0.000115803	0.203357	5.82141e-05	5.06141e-05	0.000802625	0.000122749	0.0725296	0	0	0.0016567	0.000238423	0	0.00189381	0.00023035	0.00159673	0.000203564	1.18606	0.00163472	0.000358671	0.00166084	0.000226101	0.984272
Protein HBT1 OS=Saccharomyces cerevisiae (strain ATCC 204508 / S288c) GN=HBT1 PE=1 SV=1	HBT1 Crem YDL223C	Q07653	5.92	1046	113616	0	0	Cytoplasm.	cell morphogenesis involved in conjugation with cellular fusion; cytoplasm; mating projection; plasma membrane; regulation of cell shape	0.000184873	0.000187874	0.00075225	0.00043961	0.245761	0	0	4.5138e-05	1.47781e-05	0	6.34716e-05	0.000109936	2.98098e-05	3.07108e-05	2.12922	0.00175817	0.000316108	0.000325032	5.3648e-05	5.4092	0.0021001	0.000168042	0.000419093	7.80672e-05	5.01106	0.00216501	0.000122232	0.000376115	5.10188e-05	5.75625
Translation machinery-associated protein 46 OS=Saccharomyces cerevisiae (strain ATCC 204508 / S288c) GN=TMA46 PE=1 SV=2	TMA46 DFRP1 YOR091W YOR3160w	Q12000	9.38	345	39514	0	0	Cytoplasm.	cytoplasm; cytoplasmic translation; nucleic acid binding; zinc ion binding	---	---	---	---	---	0.000331222	0.000108661	0	0	---	0.000232705	3.51113e-05	0.000113518	0.000196618	2.04995	0.000222323	0.000222001	0	0	---	0.000141179	0.000162313	0	0	---	3.71976e-05	6.44281e-05	2.66729e-05	4.61989e-05	1.39458
Translation machinery-associated protein 7 OS=Saccharomyces cerevisiae (strain ATCC 204508 / S288c) GN=TMA7 PE=1 SV=1	TMA7 YLR262C-A	Q3E764	10.26	64	6941.25	0	0	Cytoplasm. Nucleus.	cytoplasm; cytoplasmic translation; nucleus	0.00848921	0.00346577	0.00227273	0.00112137	3.73525	0.00198319	0.00067579	0.00192859	0.000246439	1.02831	0.00178375	0.000675741	0.000955347	0.00043866	1.86712	0.00104208	0.000387655	0.000882205	0.000897516	1.18122	0.00186523	0.000637468	0.000859806	3.52258e-05	2.16937	0.00170998	0.000942689	0.000878959	1.63737e-05	1.94547
FK506-binding protein 1 OS=Saccharomyces cerevisiae (strain ATCC 204508 / S288c) GN=FPR1 PE=1 SV=2	FPR1 FKB1 RBP1 YNL135C N1213 N1845	P20081	5.72	114	12157.9	5	0	Cytoplasm.	FK506 binding; chromatin organization; membrane; mitochondrion; nucleus; peptidyl-prolyl cis-trans isomerase activity; protein folding; regulation of homoserine biosynthetic process	0.00332681	0.000426019	0.00523059	0.000843671	0.63603	0.00357274	0.000726293	0.00307737	0.000307608	1.16097	0.00187438	0.000825417	0.00361569	0.000243894	0.518403	0.00536584	0.0014404	0.00227039	0.0004457	2.3634	0.00554463	0.000748215	0.00233748	0.000411389	2.37206	0.00527353	0.000509296	0.00280083	0.000429733	1.88285
Mitochondrial outer membrane protein OM45 OS=Saccharomyces cerevisiae (strain ATCC 204508 / S288c) GN=OM45 PE=1 SV=2	OM45 YIL136W	P16547	8.55	393	44580.4	0	0	Mitochondrion outer membrane.	integral to mitochondrial outer membrane	0	0	9.04727e-05	3.46663e-05	0	0.000161959	0.000147943	0	0	---	0.00043605	0.000324869	0.000185787	0.000259768	2.34704	0.00153617	0.000335361	0.00157173	9.43473e-05	0.977373	0.00328846	0.000177274	0.00119218	0.000290039	2.75837	0.00317292	0.000471848	0.00114286	0.000246298	2.77631
Histidine--tRNA ligase, mitochondrial OS=Saccharomyces cerevisiae (strain ATCC 204508 / S288c) GN=HTS1 PE=1 SV=2	HTS1 YPR033C YP9367.13C	P07263	6.21	546	57750.9	6	0	Cytoplasm. Mitochondrion.	ATP binding; aminoacyl-tRNA ligase activity; histidine-tRNA ligase activity; histidyl-tRNA aminoacylation; mitochondrial translation; mitochondrion	0.000117302	0.000107118	1.70159e-05	2.94725e-05	6.89364	0.000326422	0.000162205	0.000206743	0.000132599	1.57887	0.000522698	7.35751e-05	9.76513e-05	0.000122467	5.3527	---	---	---	---	---	---	---	---	---	---	---	---	---	---	---
ATP-dependent RNA helicase DBP5 OS=Saccharomyces cerevisiae (strain ATCC 204508 / S288c) GN=DBP5 PE=1 SV=2	DBP5 RAT8 YOR046C	P20449	6.99	482	53873.9	3	0	Cytoplasm. Nucleus â€º nuclear pore complex. Nucleus membrane; Peripheral membrane protein; Cytoplasmic side.	ATP binding; ATP-dependent helicase activity; RNA binding; RNA helicase activity; RNA-dependent ATPase activity; cellular bud tip; cytoplasm; mRNA export from nucleus; nuclear membrane; nuclear pore cytoplasmic filaments; polysome; protein transport; translational termination	---	---	---	---	---	0	0	0.000176365	5.47258e-05	0	6.64169e-05	6.42275e-05	0.000255578	5.28227e-05	0.259869	0	0	0.00024955	0.000216781	0	0	0	0.000324928	0.0001457	0	0	0	0.000311217	3.40511e-05	0
Phosphoglucomutase-2 OS=Saccharomyces cerevisiae (strain ATCC 204508 / S288c) GN=PGM2 PE=1 SV=1	PGM2 GAL5 YMR105C YM9718.04C	P37012	6.18	569	63088.5	5	0	Cytoplasm.	UDP-glucose metabolic process; cellular calcium ion homeostasis; cytosol; galactose catabolic process; glucose 1-phosphate metabolic process; glucose 6-phosphate metabolic process; glucose metabolic process; glycogen biosynthetic process; magnesium ion binding; phosphoglucomutase activity; trehalose biosynthetic process	0.00196923	0.000923271	0	0	---	0.00029132	0.000157802	0.000266139	5.17132e-05	1.09461	0.000441387	9.28136e-05	0.000271577	9.19717e-05	1.62527	0.00261993	0.000454544	0.000162752	5.91487e-05	16.0977	0.00163434	0.000413594	9.63617e-05	4.63922e-05	16.9604	0.00177362	0.000293856	9.94774e-05	5.12829e-05	17.8293
Ribosome-associated complex subunit SSZ1 OS=Saccharomyces cerevisiae (strain ATCC 204508 / S288c) GN=SSZ1 PE=1 SV=2	SSZ1 PDR13 YHR064C	P38788	4.94	538	58237.8	0	0	Cytoplasm.	ATP binding; cytoplasm; cytoplasmic translation; polysome; rRNA processing; regulation of translational fidelity; unfolded protein binding	0.000196593	0.000182358	6.49324e-05	7.23931e-05	3.02766	0.000283927	7.29617e-05	0.000565696	0.000127057	0.501908	0.000309277	0.00021972	0.000634304	2.96242e-05	0.487585	0.000216465	0.000138452	0.000188617	3.23087e-05	1.14764	8.84964e-05	7.67168e-05	0.000136581	3.1365e-05	0.647942	0.000137057	6.76674e-05	5.32609e-05	9.22505e-05	2.57331
Clathrin heavy chain OS=Saccharomyces cerevisiae (strain ATCC 204508 / S288c) GN=CHC1 PE=1 SV=1	CHC1 YGL206C	P22137	5.11	1653	187234	0	0	Cytoplasmic vesicle membrane; Peripheral membrane protein; Cytoplasmic side. Membrane â€º coated pit; Peripheral membrane protein; Cytoplasmic side.	clathrin coat of coated pit; clathrin coat of trans-Golgi network vesicle; clathrin vesicle coat; endocytosis; intracellular protein transport; structural molecule activity	2.37109e-05	2.31369e-05	0	0	---	5.39222e-05	2.68149e-05	0.000155565	3.26715e-05	0.346621	3.38524e-05	4.34634e-05	5.6755e-05	2.05182e-05	0.596466	---	---	---	---	---	---	---	---	---	---	---	---	---	---	---
Fumarate hydratase, mitochondrial OS=Saccharomyces cerevisiae (strain ATCC 204508 / S288c) GN=FUM1 PE=1 SV=2	FUM1 YPL262W	P08417	UNDEFINED	488	0	4	Carbohydrate metabolism; tricarboxylic acid cycle; (S)-malate from fumarate: step 1/1.	Mitochondrion matrix. Cytoplasm.	cytosol; fumarate hydratase activity; fumarate metabolic process; mitochondrial matrix; tricarboxylic acid cycle; tricarboxylic acid cycle enzyme complex	0.000105523	0.000121449	0	0	---	0.000730134	0.000166562	0.000310579	8.51241e-05	2.35088	0.000697204	0.000184295	0.000314479	9.25558e-05	2.21702	---	---	---	---	---	---	---	---	---	---	---	---	---	---	---
Saccharolysin OS=Saccharomyces cerevisiae (strain ATCC 204508 / S288c) GN=PRD1 PE=1 SV=1	PRD1 YCL057W YCL57W	P25375	5.51	712	81933.7	3	0	Cytoplasm.	metal ion binding; metalloendopeptidase activity; mitochondrial intermembrane space; proteolysis	0.000149677	0.0001298	0	0	---	1.80204e-05	3.12122e-05	0.000212505	5.58571e-05	0.0847996	3.31143e-05	2.93566e-05	0.0002056	9.88633e-05	0.161062	---	---	---	---	---	---	---	---	---	---	---	---	---	---	---
60S ribosomal protein L30 OS=Saccharomyces cerevisiae (strain ATCC 204508 / S288c) GN=RPL30 PE=1 SV=3	RPL30 RPL32 YGL030W	P14120	9.8	105	11284.2	0	0	Cytoplasm.	cytoplasmic translation; cytosolic large ribosomal subunit; negative regulation of mRNA splicing, via spliceosome; negative regulation of translation; pre-mRNA 5'-splice site binding; rRNA processing; structural constituent of ribosome	0.00112334	0.00036153	0	0	---	0.00424077	0.000581843	0.00398186	0.00112758	1.06502	0.00408294	0.00102181	0.00325155	0.000361225	1.25569	0.000756742	0.000366808	0	0	---	0.000683466	1.84744e-05	0	0	---	0.000579006	0.000183922	0	0	---
Cofilin OS=Saccharomyces cerevisiae (strain ATCC 204508 / S288c) GN=COF1 PE=1 SV=1	COF1 YLL050C L0596	Q03048	5.05	143	15900.8	0	0	Cytoplasm. Cytoplasm â€º cytoskeleton. Nucleus matrix.	Golgi to plasma membrane protein transport; actin cortical patch; actin filament binding; actin filament depolymerization; actin filament severing; endocytosis; nuclear matrix; plasma membrane	0.00415386	0.0013152	0.00220314	0.000308264	1.88543	0.00489136	0.00019304	0.00206861	0.000561059	2.36457	0.00253463	0.00051288	0.00273095	0.000668139	0.928112	0.00489619	0.000430648	0.00129441	0.00033388	3.78256	0.00376627	0.000476885	0.00180102	0.0004441	2.09119	0.00392231	0.000844725	0.00137564	0.000183793	2.85127
NADPH dehydrogenase 2 OS=Saccharomyces cerevisiae (strain ATCC 204508 / S288c) GN=OYE2 PE=1 SV=3	OYE2 YHR179W	Q03558	6.15	400	44879.5	1	0	0	FMN binding; NADPH dehydrogenase activity; apoptotic process; mitochondrion; nucleus; pentaerythritol trinitrate reductase activity; trichloro-p-hydroquinone reductive dehalogenase activity	0.00226793	0.000790232	0	0	---	6.41525e-05	0.000111115	0.001545	0.000138242	0.0415227	6.63913e-05	0.000114993	0.00168485	0.000283133	0.0394049	0.000802026	0.000225867	2.24521e-05	3.88882e-05	35.7217	0.0002432	0.000230268	0	0	---	0.00075511	0.000764312	0	0	---
10 kDa heat shock protein, mitochondrial OS=Saccharomyces cerevisiae (strain ATCC 204508 / S288c) GN=HSP10 PE=1 SV=1	HSP10 CPN10 YOR020C OR26.10	P38910	8.96	106	11372.3	0	0	Mitochondrion matrix.	ATP binding; mitochondrial matrix; protein refolding; unfolded protein binding	0.00221033	0.000665175	0.00449864	0.000160393	0.491333	0.00288232	0.000741454	0.00314355	0.000904969	0.9169	0.00145625	0.000520817	0.00265666	0.00087016	0.548151	0.00685883	3.82684e-05	0.00450191	0.00125644	1.52354	0.00541891	0.00215182	0.00588263	0.000444865	0.921172	0.0050821	0.000617411	0.00566244	0.00059148	0.897509
Midasin OS=Saccharomyces cerevisiae (strain ATCC 204508 / S288c) GN=MDN1 PE=1 SV=1	MDN1 REA1 YLR106C L8004.13	Q12019	4.9	4910	559308	0	0	Nucleus.	ATP binding; ATPase activity; mitochondrion; nucleoplasm; protein complex assembly; rRNA processing; ribosomal large subunit assembly	---	---	---	---	---	---	---	---	---	---	4.64959e-06	8.05333e-06	4.1723e-06	3.62386e-06	1.1144	1.12583e-05	1.33287e-05	0	0	---	1.23522e-05	1.12893e-05	1.95312e-06	3.38291e-06	6.32435	1.49957e-05	5.98061e-07	1.87417e-06	3.24615e-06	8.00125
NADPH-dependent alpha-keto amide reductase OS=Saccharomyces cerevisiae (strain ATCC 204508 / S288c) GN=YDL124W PE=1 SV=1	YDL124W D2240	Q07551	5.85	312	35560.6	1	0	Cytoplasm. Nucleus.	alditol:NADP+ 1-oxidoreductase activity; alpha-keto amide reductase activity; alpha-keto ester reductase activity; cellular amide metabolic process; cellular aromatic compound metabolic process; cellular ketone metabolic process; cellular response to oxidative stress; cytoplasm; nucleus; plasma membrane	0.000552585	0.000279761	0	0	---	0.000447868	0.000252377	0.000547706	8.74935e-05	0.817715	0.000861827	0.000253208	0.00052703	0.00030421	1.63525	0.000173024	0.000150405	0	0	---	0	0	0	0	---	4.11319e-05	7.12426e-05	0	0	---
Thiosulfate sulfurtransferase RDL1, mitochondrial OS=Saccharomyces cerevisiae (strain ATCC 204508 / S288c) GN=RDL1 PE=1 SV=1	RDL1 YOR285W	Q12305	5.91	139	15413.3	2	0	Mitochondrion.	endoplasmic reticulum; mitochondrial outer membrane; thiosulfate sulfurtransferase activity	0.000665316	0.000193339	0.00682112	0.000986091	0.0975377	0.00128114	0.000163763	0.00116427	0.000481508	1.10039	0.00187474	0.00162756	0.00222228	0.000545883	0.843609	0.000949494	0.000412984	0.00118974	0.000171995	0.798071	0.00267274	0.000364418	0.000850299	0.000269923	3.14329	0.00256987	0.000670357	0.000605767	0.000198633	4.24233
Superoxide dismutase [Cu-Zn] OS=Saccharomyces cerevisiae (strain ATCC 204508 / S288c) GN=SOD1 PE=1 SV=2	SOD1 YJR104C J1968	P00445	5.63	154	15723.4	1	0	Cytoplasm. Mitochondrion intermembrane space.	age-dependent response to reactive oxygen species involved in chronological cell aging; cellular copper ion homeostasis; cellular zinc ion homeostasis; copper ion binding; cytosol; fungal-type cell wall organization; mitochondrial intermembrane space; negative regulation of cellular respiration; nucleus; positive regulation of sequence-specific DNA binding transcription factor activity; protein s…	0.00257223	0.000943144	0.0192291	0.00656031	0.133768	0.00256137	0.000529128	0.00295156	0.000480003	0.867804	0.0019161	0.000581245	0.00276566	0.000852799	0.692816	0.00894144	0.00255055	0.01269	0.00130854	0.704606	0.0138214	0.000281979	0.00859589	0.00114597	1.60791	0.0137066	0.00111201	0.00805091	0.001343	1.7025
Aminopeptidase Y OS=Saccharomyces cerevisiae (strain ATCC 204508 / S288c) GN=APE3 PE=1 SV=1	APE3 YBR286W YBR2024	P37302	5.37	537	53901.5	3	0	Vacuole.	aminopeptidase activity; fungal-type vacuole; metallopeptidase activity; proteolysis; vacuolar protein catabolic process	0.000217466	0.000185854	0.000596615	0.00022478	0.3645	9.4929e-05	4.19404e-05	0.000653984	7.39117e-05	0.145155	0.000146033	6.29248e-05	0.000613965	0.000283821	0.237853	9.78059e-05	3.89983e-05	0.000258947	0.000141111	0.377706	0.000357232	0.000158196	0.000171567	3.70438e-05	2.08218	0.000475484	0.000193198	0.000225677	0.000116216	2.10692
Clathrin light chain OS=Saccharomyces cerevisiae (strain ATCC 204508 / S288c) GN=CLC1 PE=1 SV=1	CLC1 YGR167W	P17891	4.31	233	26531.5	0	0	Cytoplasmic vesicle membrane; Peripheral membrane protein; Cytoplasmic side. Membrane â€º coated pit; Peripheral membrane protein; Cytoplasmic side.	clathrin coat of coated pit; clathrin coat of trans-Golgi network vesicle; clathrin vesicle coat; endocytosis; intracellular protein transport; structural molecule activity	0.00090234	0.000352005	0.0120035	0.000672869	0.0751733	0.00027237	9.28124e-05	0.00147491	0.000475163	0.184669	0.000238585	0.000138422	0.00133147	6.21843e-05	0.179189	0.00028044	8.48558e-05	0.0035186	0.000415752	0.0797021	0.000976403	0.000109052	0.00401092	0.000140463	0.243436	0.000573082	0.000222784	0.00357444	0.000539999	0.160328
Nucleolar protein 3 OS=Saccharomyces cerevisiae (strain ATCC 204508 / S288c) GN=NPL3 PE=1 SV=1	NPL3 MTR13 MTS1 NAB1 NOP3 YDR432W D9461.19	Q01560	5.38	414	45407.4	0	0	Nucleus â€º nucleolus.	cytoplasm; eukaryotic initiation factor 4G binding; mRNA export from nucleus; mRNA splicing, via spliceosome; negative regulation of termination of RNA polymerase II transcription, poly(A)-coupled; negative regulation of translation; nucleolus; nucleotide binding; nucleus; poly(A) RNA binding; positive regulation of transcription elongation from RNA polymerase II promoter; rRNA processing; ribonu…	0.000608613	0.000266019	0.000190911	0.000160185	3.18794	0.000923126	0.00037579	0.000735444	0.00011855	1.25519	0.000441209	0.00039133	0.00082467	9.16151e-05	0.535013	0.000699518	0.00019747	4.5075e-05	3.90745e-05	15.519	0.000431872	7.52764e-05	2.14085e-05	3.70805e-05	20.173	0.000380457	0.000173405	2.22275e-05	3.84991e-05	17.1165
60S acidic ribosomal protein P1-alpha OS=Saccharomyces cerevisiae (strain ATCC 204508 / S288c) GN=RPP1A PE=1 SV=4	RPP1A L12EIIA RPA1 RPLA1 YDL081C	P05318	3.77	106	10776.8	0	0	Cytoplasm.	cytoplasmic translation; cytosolic large ribosomal subunit; structural constituent of ribosome; translational elongation	0.00392555	0.0016203	0.0116582	0.00473287	0.336721	0.00263837	0.000542762	0.0129954	0.000867668	0.203023	0.000889712	0.00078875	0.00624443	0.00125532	0.142481	0.00214322	0.000681819	0.0193978	0.00182037	0.110488	0.00235343	0.000819972	0.0211114	0.00102991	0.111476	0.00327117	0.00126913	0.0208642	0.00157722	0.156784
Alcohol dehydrogenase 3, mitochondrial OS=Saccharomyces cerevisiae (strain ATCC 204508 / S288c) GN=ADH3 PE=1 SV=2	ADH3 YMR083W YM9582.08	P07246	7.24	375	37164.7	1	0	Mitochondrion matrix.	NADH oxidation; alcohol dehydrogenase (NAD) activity; amino acid catabolic process to alcohol via Ehrlich pathway; fermentation; mitochondrial matrix; zinc ion binding	0.00055539	0.000319716	0	0	---	0.000475324	0.000121712	0.000174473	0.000155238	2.72434	0.000457279	0.000419374	0.00132366	6.18195e-05	0.345466	0.00671451	0.000540244	0.00172226	0.000421484	3.89867	0.00675909	0.00017152	0.00193231	0.000139397	3.49793	0.00643841	0.00150313	0.00190054	0.000247504	3.38767
Cluster of Myosin-5 OS=Saccharomyces cerevisiae (strain ATCC 204508 / S288c) GN=MYO5 PE=1 SV=1 (MYO5_YEAST)	MYO5 YMR109W YM9718.08	Q04439	9.32	1219	136899	0	0	Cytoplasm â€º cytoskeleton â€º actin patch.	ATP binding; actin cortical patch; actin cortical patch localization; bipolar cellular bud site selection; exocytosis; fungal-type cell wall organization; mating projection tip; microfilament motor activity; myosin complex; receptor-mediated endocytosis; response to salt stress	2.08953e-05	3.61918e-05	4.42128e-05	2.24949e-05	0.472608	---	---	---	---	---	3.26783e-05	5.66004e-05	4.19963e-05	3.92669e-05	0.778123	---	---	---	---	---	---	---	---	---	---	---	---	---	---	---
Dihydroxyacetone kinase 1 OS=Saccharomyces cerevisiae (strain ATCC 204508 / S288c) GN=DAK1 PE=1 SV=1	DAK1 YML070W	P54838	5.25	584	62075.5	2	Polyol metabolism; glycerol fermentation; glycerone phosphate from glycerol (oxidative route): step 2/2.	0	ATP binding; anaerobic glycerol catabolic process; cytoplasm; glycerol catabolic process; glycerone kinase activity; triokinase activity	0.000519625	0.000167747	0	0	---	0.000195957	1.53745e-06	0.000438615	4.15472e-05	0.446764	4.22826e-05	3.69293e-05	0.000260965	0.000146482	0.162024	---	---	---	---	---	---	---	---	---	---	---	---	---	---	---
Eukaryotic translation initiation factor 3 subunit B OS=Saccharomyces cerevisiae (strain ATCC 204508 / S288c) GN=PRT1 PE=1 SV=1	PRT1 CDC63 YOR361C	P06103	5.71	763	88129.9	0	0	Cytoplasm.	cytoplasmic stress granule; eukaryotic 43S preinitiation complex; eukaryotic 48S preinitiation complex; eukaryotic translation initiation factor 3 complex; formation of translation preinitiation complex; multi-eIF complex; nucleotide binding; regulation of translational initiation; translation initiation factor activity	---	---	---	---	---	3.34122e-05	2.89377e-05	3.78399e-05	3.85104e-05	0.882989	0.000134659	8.10593e-05	5.60687e-05	9.71138e-05	2.40169	---	---	---	---	---	---	---	---	---	---	---	---	---	---	---
Guanylate kinase OS=Saccharomyces cerevisiae (strain ATCC 204508 / S288c) GN=GUK1 PE=1 SV=2	GUK1 YDR454C D9461.39	P15454	6.6	187	20506.2	2	0	0	ATP binding; GMP metabolic process; cytoplasm; guanylate kinase activity; nucleus	0.00104332	0.000331695	0.000569767	0.000262833	1.83114	0.0022429	0.000343153	0.00106357	0.000241373	2.10884	0.00100394	0.000536813	0.00133203	0.000223047	0.753691	0.000630587	0.00018455	0.000832583	0.000200639	0.757387	0.000383764	1.03733e-05	0.000826569	0.000274985	0.464286	0.000458146	0.000106232	0.00105287	1.96135e-05	0.43514
60S ribosomal protein L8-B OS=Saccharomyces cerevisiae (strain ATCC 204508 / S288c) GN=RPL8B PE=1 SV=3	RPL8B KRB1 RPL4B YLL045C	P29453	10.02	256	27980.6	0	0	Cytoplasm.	cytoplasmic translation; cytosolic large ribosomal subunit; ribosome biogenesis; structural constituent of ribosome	0.000404003	0.000222379	0	0	---	0.00466671	0.000395519	0.00504105	0.000467519	0.925742	0.00659049	0.00155041	0.00409863	0.000566747	1.60797	0.00154794	0.000232921	0	0	---	0.000703221	0.000157541	3.53939e-05	6.13041e-05	19.8684	0.000471464	0.000286116	7.18919e-05	0.00012452	6.55796
Fimbrin OS=Saccharomyces cerevisiae (strain ATCC 204508 / S288c) GN=SAC6 PE=1 SV=1	SAC6 YDR129C YD9302.04C	P32599	5.3	642	71772.7	0	0	0	actin cortical patch; actin filament binding; actin filament bundle; actin filament organization; bipolar cellular bud site selection; calcium ion binding; cellular bud tip; endocytosis; mating projection tip; plasma membrane; protein binding, bridging; response to osmotic stress	---	---	---	---	---	5.91728e-05	0.00010249	0.000147661	2.26726e-05	0.400735	0.000157709	0.000102975	0.000142397	7.47951e-05	1.10753	6.19264e-05	3.72057e-06	0.000158979	5.59573e-05	0.389525	0	0	0.000156488	1.9186e-05	0	3.99787e-05	6.92451e-05	8.7622e-05	1.63227e-06	0.456263
60S ribosomal protein L43-A OS=Saccharomyces cerevisiae (strain ATCC 204508 / S288c) GN=RPL43A PE=1 SV=1	RPL43A YPR043W YP9499.02	P0CX25	10.43	92	9959.68	0	0	Cytoplasm.	cytoplasmic translation; cytosolic large ribosomal subunit; metal ion binding; structural constituent of ribosome	0.000834591	0.000830618	0	0	---	0.0040087	0.00025487	0.00114486	0.000806237	3.50147	0.00455474	0.00129367	0.00188906	0.000598195	2.41111	0.000863673	0.000418639	0	0	---	0.000384793	0.000378288	0	0	---	0.00027041	0.000234534	0	0	---
rRNA-processing protein EBP2 OS=Saccharomyces cerevisiae (strain ATCC 204508 / S288c) GN=EBP2 PE=1 SV=1	EBP2 YKL172W YKL636	P36049	6.05	427	49734.4	0	0	Nucleus â€º nucleolus.	nuclear division; nuclear periphery; nucleolus; preribosome, large subunit precursor; rRNA processing	0.000519737	0.000181424	0.000275652	0.000152034	1.88548	0.000179111	0.000155125	0	0	---	6.21933e-05	0.000107722	0.000311797	9.58124e-05	0.199467	3.00249e-05	5.20047e-05	8.57675e-05	3.5051e-05	0.350073	0.000421603	9.44508e-05	6.227e-05	0.000107855	6.77056	0.000364423	0.000378059	6.46522e-05	0.000111981	5.63667
GMP synthase [glutamine-hydrolyzing] OS=Saccharomyces cerevisiae (strain ATCC 204508 / S288c) GN=GUA1 PE=1 SV=4	GUA1 YMR217W YM8261.11	P38625	6.05	525	58351	6	Purine metabolism; GMP biosynthesis; GMP from XMP (L-Gln route): step 1/1.	Cytoplasm.	ATP binding; GMP biosynthetic process; GMP synthase (glutamine-hydrolyzing) activity; cytoplasm; glutamine metabolic process; pyrophosphatase activity	9.96152e-05	4.16991e-05	0	0	---	0.00024178	0.000109718	7.26917e-05	6.30174e-05	3.3261	0.000530132	0.000230899	0.00011504	9.41831e-05	4.60825	7.5833e-05	7.33962e-05	1.71064e-05	2.96291e-05	4.43303	9.13493e-05	4.04529e-05	0	0	---	6.86205e-05	6.88268e-05	0	0	---
Dihydroorotate dehydrogenase (fumarate) OS=Saccharomyces cerevisiae (strain ATCC 204508 / S288c) GN=URA1 PE=1 SV=1	URA1 YKL216W	P28272	5.8	314	34800.9	1	Pyrimidine metabolism; UMP biosynthesis via de novo pathway.	Cytoplasm.	'de novo' UMP biosynthetic process; 'de novo' pyrimidine nucleobase biosynthetic process; cytoplasm; dihydroorotate dehydrogenase activity; dihydroorotate oxidase (fumarate) activity; dihydroorotate oxidase activity; extrinsic to membrane	0.00129954	0.00039622	0	0	---	0.00101221	6.67231e-05	0.000728586	0.0002483	1.38928	0.000951183	5.47003e-05	0.000884447	0.00016497	1.07546	---	---	---	---	---	---	---	---	---	---	---	---	---	---	---
Glutathione reductase OS=Saccharomyces cerevisiae (strain ATCC 204508 / S288c) GN=GLR1 PE=1 SV=2	GLR1 YPL091W LPG17W	P41921	7.67	483	53440.9	1	0	Cytoplasm.	NADP binding; cell redox homeostasis; cellular response to oxidative stress; cytosol; flavin adenine dinucleotide binding; glutathione metabolic process; glutathione-disulfide reductase activity; mitochondrion; nucleus; protein glutathionylation	0.00062624	0.000132846	0	0	---	0	0	0.00029582	6.57018e-05	0	0.00016005	8.81314e-05	0.000385055	6.53756e-05	0.415655	0.000108741	4.33584e-05	0	0	---	7.55625e-05	7.58409e-05	0	0	---	7.62203e-05	3.03983e-06	0	0	---
Phospho-2-dehydro-3-deoxyheptonate aldolase, tyrosine-inhibited OS=Saccharomyces cerevisiae (strain ATCC 204508 / S288c) GN=ARO4 PE=1 SV=2	ARO4 YBR249C YBR1701	P32449	6.47	370	39749.1	2	Metabolic intermediate biosynthesis; chorismate biosynthesis; chorismate from D-erythrose 4-phosphate and phosphoenolpyruvate: step 1/7.	0	3-deoxy-7-phosphoheptulonate synthase activity; aromatic amino acid family biosynthetic process; chorismate biosynthetic process; cytoplasm; nucleus; response to stress	0.00103252	0.000199332	0	0	---	0.000686531	0.000152848	0.00061292	0.000191936	1.1201	0.00071301	0.000421966	0.000388736	0.000116657	1.83417	0.00155401	0.000472645	0.000197566	0.00021195	7.86577	0.00100112	2.91422e-05	0.000371274	7.03097e-05	2.69645	0.00122867	0.000107532	0.000278257	3.98686e-05	4.41557
Branched-chain-amino-acid aminotransferase, cytosolic OS=Saccharomyces cerevisiae (strain ATCC 204508 / S288c) GN=BAT2 PE=1 SV=1	BAT2 TWT2 YJR148W J2209	P47176	6.91	376	41624.7	2	Amino-acid biosynthesis; L-isoleucine biosynthesis; L-isoleucine from 2-oxobutanoate: step 4/4. Amino-acid biosynthesis; L-leucine biosynthesis; L-leucine from 3-methyl-2-oxobutanoate: step 4/4. Amino-acid biosynthesis; L-valine biosynthesis; L-valine from pyruvate: step 4/4. Amino-acid biosynthesis; L-methionine biosynthesis via salvage pathway; L-methionine from S-methyl-5-thio-alpha-D-ribose 1…	Cytoplasm.	L-isoleucine transaminase activity; L-leucine transaminase activity; L-methionine salvage from methylthioadenosine; L-valine transaminase activity; branched-chain amino acid biosynthetic process; branched-chain amino acid catabolic process; branched-chain-amino-acid transaminase activity; cytoplasm; isoleucine biosynthetic process; leucine biosynthetic process; nucleus; valine biosynthetic process	0.000313032	0.000270975	2.27331e-05	3.93749e-05	13.7699	0.000303914	9.9702e-05	0.000406041	0.000126823	0.748481	0.000391724	9.07679e-05	0.000358479	6.02411e-05	1.09274	7.17864e-05	6.24019e-05	2.54509e-05	4.40822e-05	2.82059	0	0	0.000122252	4.36517e-05	0	0	0	0	0	---
C-1-tetrahydrofolate synthase, mitochondrial OS=Saccharomyces cerevisiae (strain ATCC 204508 / S288c) GN=MIS1 PE=1 SV=1	MIS1 YBR084W YBR0751	P09440	8.29	975	102234	1	One-carbon metabolism; tetrahydrofolate interconversion.	Mitochondrion.	ATP binding; folic acid biosynthetic process; formate-tetrahydrofolate ligase activity; histidine biosynthetic process; methenyltetrahydrofolate cyclohydrolase activity; methionine biosynthetic process; methylenetetrahydrofolate dehydrogenase (NADP+) activity; mitochondrion; nucleobase-containing compound metabolic process; purine nucleotide biosynthetic process; tetrahydrofolate interconversion	---	---	---	---	---	2.5965e-05	2.24863e-05	0.000135234	6.49507e-05	0.192001	0.000148009	7.03593e-05	5.09752e-05	6.23572e-05	2.90356	3.93911e-05	3.94483e-05	0	0	---	0	0	0	0	---	6.23545e-05	1.98069e-05	9.6134e-06	1.66509e-05	6.48621
60S ribosomal protein L6-A OS=Saccharomyces cerevisiae (strain ATCC 204508 / S288c) GN=RPL6A PE=1 SV=2	RPL6A RPL17A YL16A YML073C	Q02326	10.1	176	19830.3	0	0	Cytoplasm.	RNA binding; cytoplasmic translation; cytosolic large ribosomal subunit; ribosomal large subunit assembly; structural constituent of ribosome	0.000144724	0.000250669	0	0	---	0.00332407	0.000264806	0.00254337	0.000702106	1.30696	0.00474337	0.000897423	0.00181138	0.000469792	2.61865	---	---	---	---	---	---	---	---	---	---	---	---	---	---	---
ARS-binding factor 2, mitochondrial OS=Saccharomyces cerevisiae (strain ATCC 204508 / S288c) GN=ABF2 PE=1 SV=1	ABF2 HIM1 YMR072W YM9916.11	Q02486	9.66	183	18622.3	0	0	Mitochondrion. Nucleus.	DNA binding, bending; mitochondrial DNA packaging; mitochondrial chromosome; mitochondrion inheritance; nucleus	0.00141208	0.00113092	9.74773e-05	8.46372e-05	14.4863	0.000832885	0.000203489	0.000780063	0.000275408	1.06771	0.0017894	0.000383151	0.000775225	0.000472366	2.30823	0.00113326	0.000614782	0.000956576	0.000228483	1.1847	0.00137589	0.000230559	0.0007438	0.000272724	1.84981	0.00120154	0.000316826	0.000719137	0.000241098	1.67081
Cluster of 40S ribosomal protein S10-A OS=Saccharomyces cerevisiae (strain ATCC 204508 / S288c) GN=RPS10A PE=1 SV=1 (RS10A_YEAST)	RPS10A YOR293W	Q08745	8.73	105	12739.5	0	0	Cytoplasm.	cytoplasmic translation; cytosolic small ribosomal subunit; rRNA export from nucleus; structural constituent of ribosome	---	---	---	---	---	0.0030253	0.000397678	0.00279349	0.000613023	1.08298	0.00227606	0.00037577	0.00214424	0.000635562	1.06148	0	0	0	0	---	0	0	0.000341409	0.000295722	0	0	0	0.000175279	0.000303593	0
D-arabinose dehydrogenase [NAD(P)+] heavy chain OS=Saccharomyces cerevisiae (strain ATCC 204508 / S288c) GN=ARA1 PE=1 SV=1	ARA1 YBR149W YBR1127	P38115	5.65	344	38883.6	1	0	Cytoplasm.	D-arabinose 1-dehydrogenase [NAD(P)+] activity; alditol:NADP+ 1-oxidoreductase activity; cellular carbohydrate metabolic process; cytosol	0.00168292	0.00023554	0	0	---	0.000590806	0.000253468	0.000409926	0.000238737	1.44125	0.000818797	0.000323305	0.00038177	0.000264725	2.14474	0.00174584	0.000448294	0	0	---	0.000973101	0.000264891	5.36423e-05	4.65635e-05	18.1406	0.001078	0.0003639	8.02515e-05	0.000139	13.4328
60S ribosomal protein L37-A OS=Saccharomyces cerevisiae (strain ATCC 204508 / S288c) GN=RPL37A PE=1 SV=2	RPL37A RPL35A YLR185W L9470.6	P49166	11.64	88	9719.08	0	0	Cytoplasm.	cytoplasmic translation; cytosolic large ribosomal subunit; metal ion binding; rRNA binding; structural constituent of ribosome	0.00219538	0.0026225	0	0	---	0.00187961	0.000506448	0.002788	0.0014264	0.674179	0.00625214	0.000788429	0.00350481	0.0005495	1.78387	0.00590321	0.00144725	0	0	---	0.0025728	0.000555787	0.000318668	0.000327239	8.0736	0.00209824	0.00111157	0	0	---
UBX domain-containing protein 1 OS=Saccharomyces cerevisiae (strain ATCC 204508 / S288c) GN=SHP1 PE=1 SV=1	SHP1 UBX1 YBL058W YBL0509 YBL0515	P34223	4.89	423	46987.3	0	0	Nucleus. Cytoplasm.	ER-associated protein catabolic process; ascospore formation; autophagic vacuole assembly; cytoplasm; glycogen metabolic process; nucleus; piecemeal microautophagy of nucleus; protein phosphatase type 1 regulator activity; sister chromatid biorientation	0	0	0.000624967	0.00051162	0	0.000509959	0.000224098	0.000359178	3.71845e-05	1.4198	0	0	0.000760458	0.000117514	0	0.000127489	6.36697e-05	0.000368937	0.000128401	0.345557	0.000536692	9.51525e-05	0.000239225	4.44998e-05	2.24347	0.000596761	0.000468483	8.90559e-05	0.000101408	6.70098
Major capsid protein OS=Saccharomyces cerevisiae virus L-A GN=gag PE=1 SV=1	gag	P32503	5.51	680	75994.3	0	0	Virion.	viral capsid	---	---	---	---	---	---	---	---	---	---	0.000411131	0.000142715	0.00036099	0.000119985	1.1389	---	---	---	---	---	---	---	---	---	---	---	---	---	---	---
Eukaryotic translation initiation factor 2 subunit beta OS=Saccharomyces cerevisiae (strain ATCC 204508 / S288c) GN=SUI3 PE=1 SV=2	SUI3 TIF212 YPL237W	P09064	9.53	285	31574.2	0	0	0	eukaryotic translation initiation factor 2 complex; metal ion binding; multi-eIF complex; ribosome; translation initiation factor activity	0.000179393	0.000204571	0.00112936	0.000236061	0.158844	0.000534212	0.000264829	0.000797017	0.000154867	0.670264	0.000201592	0.000176073	0.000478178	0.000241127	0.421585	0.000597846	0.000186261	0.00103162	0.000121119	0.579518	0.000629977	0.000132445	0.00121627	0.000196062	0.51796	0.000520217	0.000233812	0.00118491	0.000112572	0.439036
60S ribosomal protein L6-B OS=Saccharomyces cerevisiae (strain ATCC 204508 / S288c) GN=RPL6B PE=1 SV=4	RPL6B RPL16B RPL17B YL16B YLR448W L9324.4	P05739	10.08	176	19855.3	0	0	Cytoplasm.	RNA binding; cytoplasmic translation; cytosolic large ribosomal subunit; ribosomal large subunit assembly; structural constituent of ribosome	---	---	---	---	---	0.00310638	0.000327172	0.00237701	0.000395643	1.30684	0.0045417	0.00159223	0.00203904	0.000532085	2.22737	---	---	---	---	---	---	---	---	---	---	---	---	---	---	---
Isocitrate dehydrogenase [NAD] subunit 1, mitochondrial OS=Saccharomyces cerevisiae (strain ATCC 204508 / S288c) GN=IDH1 PE=1 SV=2	IDH1 YNL037C N2690	P28834	8.04	360	38025.4	1	0	Mitochondrion.	NAD binding; RNA binding; cytosol; glutamate biosynthetic process; isocitrate dehydrogenase (NAD+) activity; isocitrate metabolic process; magnesium ion binding; mitochondrial intermembrane space; mitochondrial isocitrate dehydrogenase complex (NAD+); mitochondrial nucleoid; tricarboxylic acid cycle	---	---	---	---	---	0.000281753	0.000160283	0.000185182	9.25941e-05	1.52149	0.000643518	3.70243e-05	8.61756e-05	4.02471e-06	7.46752	---	---	---	---	---	---	---	---	---	---	---	---	---	---	---
La protein homolog OS=Saccharomyces cerevisiae (strain ATCC 204508 / S288c) GN=LHP1 PE=1 SV=2	LHP1 LAH1 YLA1 YDL051W	P33399	8.62	275	32104.1	0	0	Nucleus.	nucleolus; nucleoplasm; nucleotide binding; ribonucleoprotein complex; tRNA binding; tRNA processing	0.00107569	0.00101402	0.000158114	0.000192864	6.80329	0.000233282	0.000404056	0.000313622	0.000215779	0.743832	0.000207541	0.000359471	0.000787542	0.000188453	0.26353	0.00115205	0.000356648	0.000268488	6.14913e-05	4.2909	0.000698063	0.000209952	0.00043243	4.56602e-05	1.61428	0.000528963	0.000250676	0.000238669	0.000118279	2.21631
Probable dipeptidyl peptidase 3 OS=Saccharomyces cerevisiae (strain ATCC 204508 / S288c) GN=YOL057W PE=1 SV=1	YOL057W O1232	Q08225	5.86	711	80510.5	3	0	Cytoplasm.	aminopeptidase activity; cytoplasm; dipeptidyl-peptidase activity; metal ion binding; metallopeptidase activity; nucleus; proteolysis	9.05977e-05	0.000113605	0	0	---	8.95075e-05	3.12887e-05	0.000105947	0.000119334	0.844832	4.81635e-05	8.34216e-05	0.000158219	6.05851e-05	0.304411	7.58478e-05	3.78794e-05	7.85829e-05	4.16509e-05	0.965195	1.71732e-05	2.97448e-05	2.49314e-05	4.31824e-05	0.688819	5.30392e-05	5.41824e-05	0	0	---
Pyridoxamine 5'-phosphate oxidase OS=Saccharomyces cerevisiae (strain ATCC 204508 / S288c) GN=PDX3 PE=1 SV=1	PDX3 YBR035C YBR0321	P38075	6.94	228	26908.3	1	Cofactor biosynthesis; B6 vitamer interconversion; pyridoxal 5'-phosphate from pyridoxamine 5'-phosphate: step 1/1. Cofactor biosynthesis; B6 vitamer interconversion; pyridoxal 5'-phosphate from pyridoxine 5'-phosphate: step 1/1.	0	FMN binding; fatty acid metabolic process; mitochondrial intermembrane space; pyridoxamine-phosphate oxidase activity; pyridoxine biosynthetic process	0.000463083	0.000265096	0	0	---	0.000835897	0.000439343	0.000457668	0.000140742	1.82643	0.000929018	0.000256481	0.000583936	0.000179438	1.59096	---	---	---	---	---	---	---	---	---	---	---	---	---	---	---
Pyruvate dehydrogenase E1 component subunit alpha, mitochondrial OS=Saccharomyces cerevisiae (strain ATCC 204508 / S288c) GN=PDA1 PE=1 SV=2	PDA1 YER178W	P16387	6.24	420	42711.7	1	0	Mitochondrion matrix.	acetyl-CoA biosynthetic process from pyruvate; glycolysis; mitochondrial nucleoid; mitochondrial pyruvate dehydrogenase complex; pyruvate dehydrogenase (acetyl-transferring) activity	---	---	---	---	---	9.08247e-05	7.12596e-07	0.000136297	0.000118158	0.666374	0.000184058	0.000101351	0.000122641	4.15333e-05	1.50078	0	0	0	0	---	2.76081e-05	4.78186e-05	0	0	---	9.16654e-05	0.000158769	4.42267e-05	3.83063e-05	2.07262
Homocitrate synthase, cytosolic isozyme OS=Saccharomyces cerevisiae (strain ATCC 204508 / S288c) GN=LYS20 PE=1 SV=1	LYS20 YDL182W D1298	P48570	6.84	428	47098.9	2	Amino-acid biosynthesis; L-lysine biosynthesis via AAA pathway; L-alpha-aminoadipate from 2-oxoglutarate: step 1/5.	Cytoplasm.	homocitrate synthase activity; lysine biosynthetic process via aminoadipic acid; mitochondrion; nucleus	---	---	---	---	---	0.000178254	1.39855e-06	0.000198919	6.3517e-05	0.896113	0.000418928	0.000150045	0.000216077	0.000123815	1.93879	5.97796e-05	5.1771e-05	0	0	---	5.67443e-05	4.91442e-05	0	0	---	5.62828e-05	9.74847e-05	4.34001e-05	3.75903e-05	1.29684
Pyruvate carboxylase 2 OS=Saccharomyces cerevisiae (strain ATCC 204508 / S288c) GN=PYC2 PE=1 SV=2	PYC2 YBR218C YBR1507	P32327	6.06	1180	130167	6	Carbohydrate biosynthesis; gluconeogenesis.	Cytoplasm.	ATP binding; DNA binding; biotin carboxylase activity; cytosol; gluconeogenesis; metal ion binding; pyruvate carboxylase activity	0.000121856	1.49178e-05	7.24377e-06	1.25466e-05	16.8222	0.000215694	7.52948e-05	0.000153866	7.19782e-05	1.40183	0.00020968	6.63269e-05	0.000227055	3.42971e-05	0.923474	5.7758e-05	5.44241e-05	0	0	---	6.04092e-05	2.89049e-05	0	0	---	6.29743e-05	5.46444e-05	0	0	---
40S ribosomal protein S7-A OS=Saccharomyces cerevisiae (strain ATCC 204508 / S288c) GN=RPS7A PE=1 SV=4	RPS7A RPS30 YOR096W YOR3177W	P26786	9.83	190	21491	0	0	Cytoplasm. Nucleus â€º nucleolus.	90S preribosome; cytoplasmic translation; cytosolic small ribosomal subunit; nucleolus; rRNA processing; ribosomal small subunit biogenesis; small-subunit processome; structural constituent of ribosome	0.000617535	0.000191719	0.000146059	0.000146699	4.22799	0.00394529	0.000789287	0.00214849	0.000333249	1.83631	0.00402036	0.000152839	0.00217024	0.000162639	1.85249	0.000882846	0.000606361	0	0	---	0.000885061	0.000404949	0	0	---	0.00069391	0.000607644	0	0	---
Vacuolar protein sorting-associated protein 1 OS=Saccharomyces cerevisiae (strain ATCC 204508 / S288c) GN=VPS1 PE=1 SV=2	VPS1 LAM1 SPO15 YKR001C	P21576	7.67	704	78736.5	0	0	Cytoplasm â€º cytoskeleton.	GTP binding; GTPase activity; actin cortical patch; actin cytoskeleton organization; cell division; endocytosis; fungal-type vacuole membrane; lipid tube assembly; meiosis; microtubule; mitochondrial outer membrane; peroxisome; peroxisome fission; protein retention in Golgi apparatus; protein targeting to vacuole	---	---	---	---	---	0.000288675	8.12138e-05	2.63958e-05	4.57188e-05	10.9364	0.000329072	1.89329e-05	0	0	---	1.82111e-05	3.15426e-05	0.000143985	5.92962e-05	0.12648	0.00017063	0.000131799	0.000156328	6.40469e-06	1.09148	0.000103313	4.89601e-05	0.000133172	2.31409e-05	0.775787
Uncharacterized peptidase YFR006W OS=Saccharomyces cerevisiae (strain ATCC 204508 / S288c) GN=YFR006W PE=1 SV=1	YFR006W	P43590	5.78	535	61753.6	3	0	Membrane; Single-pass membrane protein.	aminopeptidase activity; cellular process; cytoplasm; integral to membrane; manganese ion binding	0.000316376	0.000101468	0	0	---	0.00026093	0.000147091	0.000122985	7.82063e-05	2.12164	0.000264419	0.000234414	0.000195348	7.41039e-05	1.35358	0.000294515	0.000117432	0	0	---	0.000246853	8.27936e-05	0	0	---	0.000301112	0.000152282	0	0	---
Pyruvate carboxylase 1 OS=Saccharomyces cerevisiae (strain ATCC 204508 / S288c) GN=PYC1 PE=1 SV=2	PYC1 PYV YGL062W	P11154	5.84	1178	130099	6	Carbohydrate biosynthesis; gluconeogenesis.	Cytoplasm.	ATP binding; DNA binding; biotin carboxylase activity; cytosol; gluconeogenesis; metal ion binding; pyruvate carboxylase activity	0.000132874	2.86845e-05	0	0	---	0.000183385	6.6685e-05	0.00011331	6.1105e-05	1.61844	0.000164427	2.56712e-05	0.00016429	7.50575e-05	1.00084	0.000138531	0.000100171	0	0	---	0.000100815	4.35606e-05	0	0	---	8.41083e-05	7.29829e-05	0	0	---
Orotate phosphoribosyltransferase 1 OS=Saccharomyces cerevisiae (strain ATCC 204508 / S288c) GN=URA5 PE=1 SV=2	URA5 PYR5 YML106W YM8339.13	P13298	5.8	226	24664.5	2	Pyrimidine metabolism; UMP biosynthesis via de novo pathway; UMP from orotate: step 1/2.	0	'de novo' UMP biosynthetic process; 'de novo' pyrimidine nucleobase biosynthetic process; cytoplasm; nucleus; orotate phosphoribosyltransferase activity; pyrimidine ribonucleoside biosynthetic process	0.000637347	0.000596961	0	0	---	0.000955918	0.000190426	0.00075171	0.000314755	1.27166	0.00101683	0.000173366	0.00113019	0.000377301	0.8997	0.000597162	0.000519095	4.2343e-05	7.33403e-05	14.103	0.000632359	0.000141889	0	0	---	0.000606221	0.000369248	8.45261e-05	0.000146403	7.172
Carbamoyl-phosphate synthase arginine-specific large chain OS=Saccharomyces cerevisiae (strain ATCC 204508 / S288c) GN=CPA2 PE=1 SV=1	CPA2 YJR109C J2002	P03965	5.18	1118	123915	6	Amino-acid biosynthesis; L-arginine biosynthesis; carbamoyl phosphate from bicarbonate: step 1/1.	Cytoplasm.	ATP binding; arginine biosynthetic process; carbamoyl-phosphate synthase (glutamine-hydrolyzing) activity; carbamoyl-phosphate synthase complex; metal ion binding	---	---	---	---	---	0.000102361	8.03105e-07	3.45815e-05	4.02825e-05	2.95998	0.000134407	1.05214e-05	3.74563e-05	4.41244e-05	3.58838	---	---	---	---	---	---	---	---	---	---	---	---	---	---	---
Eukaryotic translation initiation factor 1A OS=Saccharomyces cerevisiae (strain ATCC 204508 / S288c) GN=TIF11 PE=1 SV=1	TIF11 YMR260C YM8156.02C	P38912	4.69	153	17435.1	0	0	0	double-stranded RNA binding; ribosome; translation initiation factor activity	0.00757168	0.001146	0.0107871	0.00474233	0.701917	0.00274726	0.00116012	0.000991451	0.000421611	2.77095	0.000845028	0.00104561	0.00136128	0.000366358	0.62076	0.00263814	0.00132162	0.00162142	0.000275896	1.62706	0.00374485	0.00105629	0.000914686	0.000678032	4.09414	0.00351507	0.000497651	0.00135039	0.000232324	2.60301
Cluster of Inosine-5'-monophosphate dehydrogenase 3 OS=Saccharomyces cerevisiae (strain ATCC 204508 / S288c) GN=IMD3 PE=1 SV=1 (IMDH3_YEAST)	IMD3 YLR432W L9753.4	P50095	7.04	523	56584.8	1	Purine metabolism; XMP biosynthesis via de novo pathway; XMP from IMP: step 1/1.	Cytoplasm.	GMP biosynthetic process; GTP biosynthetic process; IMP dehydrogenase activity; cytoplasm; metal ion binding; nucleotide binding; plasma membrane	0.000632003	0.000202564	3.2687e-05	5.66155e-05	19.335	0.00114181	0.000160251	0.000669618	0.000153898	1.70516	0.00146768	0.000188077	0.000906759	4.79363e-05	1.6186	0.000768232	0.00027357	0.00014026	2.64102e-05	5.47719	0.000343704	0.000122486	0.00012254	2.92094e-05	2.80483	0.000237218	0.000118197	0.000143417	3.12235e-05	1.65405
Inosine-5'-monophosphate dehydrogenase 2 OS=Saccharomyces cerevisiae (strain ATCC 204508 / S288c) GN=IMD2 PE=1 SV=1	IMD2 PUR5 YHR216W	P38697	8.71	523	56529.9	1	Purine metabolism; XMP biosynthesis via de novo pathway; XMP from IMP: step 1/1.	Cytoplasm.	GMP biosynthetic process; GTP biosynthetic process; IMP dehydrogenase activity; chromatin; chromatin binding; cytoplasm; metal ion binding; nucleotide binding	---	---	---	---	---	0.000486031	3.84914e-05	0.000343338	0.000106983	1.4156	0.000836567	5.02305e-05	0.000552581	8.82447e-06	1.51393	0.000312238	0.000288532	0	0	---	4.66927e-05	8.08741e-05	0	0	---	0	0	3.58578e-05	3.10699e-05	0
Inosine-5'-monophosphate dehydrogenase 4 OS=Saccharomyces cerevisiae (strain ATCC 204508 / S288c) GN=IMD4 PE=1 SV=1	IMD4 YML056C YM9958.06C	P50094	8.39	524	56393.9	1	Purine metabolism; XMP biosynthesis via de novo pathway; XMP from IMP: step 1/1.	Cytoplasm.	GMP biosynthetic process; IMP dehydrogenase activity; cytoplasm; metal ion binding; nucleotide binding	---	---	---	---	---	0.000994372	0.000104409	0.000702604	0.000232438	1.41527	0.00131592	0.000200193	0.000724265	0.000151669	1.81691	0.00089662	0.000349788	7.08029e-05	6.14097e-05	12.6636	0.000366094	0.00016212	0.000156135	4.65843e-05	2.34473	0.000240187	0.000239929	7.19048e-05	3.24475e-05	3.34034
Sphingolipid long chain base-responsive protein LSP1 OS=Saccharomyces cerevisiae (strain ATCC 204508 / S288c) GN=LSP1 PE=1 SV=1	LSP1 YPL004C	Q12230	4.62	341	38071.2	0	0	Cytoplasm â€º cell cortex.	cell cortex; eisosome; endocytosis; lipid binding; mitochondrial outer membrane; negative regulation of protein kinase activity; plasma membrane; response to heat	0.000263056	0.000234032	0	0	---	0.00104497	0.000238839	0.000301997	0.00026526	3.46021	0.000485071	0.000201735	0.000631074	0.000221222	0.768644	0.00019162	5.79806e-05	0	0	---	0.000174645	5.83713e-05	0	0	---	0.000175658	0.000160624	0	0	---
AMP deaminase OS=Saccharomyces cerevisiae (strain ATCC 204508 / S288c) GN=AMD1 PE=1 SV=2	AMD1 AMD YML035C	P15274	6.14	810	93301.6	3	Purine metabolism; IMP biosynthesis via salvage pathway; IMP from AMP: step 1/1.	0	AMP deaminase activity; IMP salvage; cytoplasm; guanine salvage; metal ion binding; purine nucleotide metabolic process	---	---	---	---	---	0	0	2.41735e-05	4.18697e-05	0	2.68072e-05	2.33075e-05	0.000129221	6.36407e-05	0.207453	---	---	---	---	---	---	---	---	---	---	---	---	---	---	---
Serine hydroxymethyltransferase, cytosolic OS=Saccharomyces cerevisiae (strain ATCC 204508 / S288c) GN=SHM2 PE=1 SV=2	SHM2 SHMT2 YLR058C L2156	P37291	6.98	469	52218.5	2	One-carbon metabolism; tetrahydrofolate interconversion.	Cytoplasm.	L-serine metabolic process; cytoplasm; glycine hydroxymethyltransferase activity; glycine metabolic process; mating projection tip; one-carbon metabolic process; plasma membrane; pyridoxal phosphate binding; tetrahydrofolate interconversion	8.43545e-05	8.26959e-05	5.75866e-05	2.55037e-06	1.46483	0.000379299	9.20943e-05	0.000160419	0.000228325	2.36443	0.000598189	0.000223838	6.5811e-05	6.74586e-05	9.0895	8.76485e-05	9.07951e-05	0	0	---	7.4171e-05	0.000128468	0	0	---	0.000102265	8.85672e-05	0	0	---
U3 small nucleolar RNA-associated protein 14 OS=Saccharomyces cerevisiae (strain ATCC 204508 / S288c) GN=UTP14 PE=1 SV=1	UTP14 YML093W	Q04500	4.95	899	103023	0	0	Nucleus â€º nucleolus.	ATP binding; endonucleolytic cleavage in 5'-ETS of tricistronic rRNA transcript (SSU-rRNA, 5.8S rRNA, LSU-rRNA); endonucleolytic cleavage in ITS1 to separate SSU-rRNA from 5.8S rRNA and LSU-rRNA from tricistronic rRNA transcript (SSU-rRNA, 5.8S rRNA, LSU-rRNA); endonucleolytic cleavage to generate mature 5'-end of SSU-rRNA from (SSU-rRNA, 5.8S rRNA, LSU-rRNA); nucleolus; small-subunit processome	0.000100468	9.70296e-05	7.12458e-05	4.85311e-05	1.41016	0.000169739	4.23281e-05	1.04791e-05	1.81504e-05	16.1979	3.76824e-05	3.48445e-05	3.51632e-05	6.09044e-05	1.07164	0.000161068	4.54685e-05	3.14022e-05	3.19472e-05	5.1292	0.000134005	6.41817e-05	2.0746e-05	1.79883e-05	6.45932	0.000244585	6.4493e-05	1.04261e-05	1.80585e-05	23.459
ATP-dependent RNA helicase DBP2 OS=Saccharomyces cerevisiae (strain ATCC 204508 / S288c) GN=DBP2 PE=1 SV=1	DBP2 YNL112W N1945	P24783	8.9	546	60999.4	3	0	Cytoplasm. Nucleus.	ATP binding; ATP-dependent helicase activity; RNA binding; RNA helicase activity; RNA-dependent ATPase activity; mitochondrion; nuclear polyadenylation-dependent mRNA catabolic process; nuclear-transcribed mRNA catabolic process, nonsense-mediated decay; nucleus; rRNA processing	---	---	---	---	---	4.63475e-05	8.02763e-05	0.00014118	0.000113731	0.328288	0.000412015	0.000176353	3.7231e-05	3.23081e-05	11.0665	2.33792e-05	4.04939e-05	0	0	---	0	0	0	0	---	8.7646e-05	0.000100121	0	0	---
60S ribosomal protein L16-A OS=Saccharomyces cerevisiae (strain ATCC 204508 / S288c) GN=RPL16A PE=1 SV=3	RPL16A RPL13 RPL21A YIL133C	P26784	10.48	199	22069.9	0	0	Cytoplasm.	RNA binding; cytoplasmic translation; cytosolic large ribosomal subunit; structural constituent of ribosome	---	---	---	---	---	0.00172501	0.000762729	0.00114396	0.000124188	1.50792	0.00283833	0.000741779	0.0006062	0.000522006	4.68217	---	---	---	---	---	---	---	---	---	---	---	---	---	---	---
40S ribosomal protein S23-A OS=Saccharomyces cerevisiae (strain ATCC 204508 / S288c) GN=RPS23A PE=1 SV=1	RPS23A RPS28A YGR118W G6178	P0CX29	10.73	145	16037.8	0	0	Cytoplasm.	cytosolic small ribosomal subunit; maturation of SSU-rRNA from tricistronic rRNA transcript (SSU-rRNA, 5.8S rRNA, LSU-rRNA); regulation of translational fidelity; structural constituent of ribosome; translation	---	---	---	---	---	0.00113821	0.000839098	0.000529958	0.000459212	2.14774	0.00217523	0.00190445	0.000430876	0.000579784	5.04839	9.77315e-05	0.000169276	0	0	---	0.000328352	0.000284646	0	0	---	0.00017157	0.000148808	6.34632e-05	0.000109922	2.70346
Protein SCD6 OS=Saccharomyces cerevisiae (strain ATCC 204508 / S288c) GN=SCD6 PE=1 SV=1	SCD6 YPR129W P9659.10	P45978	6.87	349	39189.6	0	0	0	cytoplasmic mRNA processing body; cytoplasmic mRNA processing body assembly; cytoplasmic stress granule; eukaryotic initiation factor 4G binding; mRNA binding; negative regulation of translational initiation; stress granule assembly	0	0	0.000205887	4.28619e-05	0	0.000400473	0.000124539	8.06096e-05	8.0983e-05	4.96805	0.00014365	0.00017774	0.000418543	0.000149787	0.343215	0.000150333	0.000166435	7.81505e-05	0.000135361	1.92363	0.000339292	0.000307049	0.000132276	4.87872e-05	2.56502	0.000414854	0.000269228	7.91017e-05	0.000137008	5.24456
Thioredoxin-1 OS=Saccharomyces cerevisiae (strain ATCC 204508 / S288c) GN=TRX1 PE=1 SV=3	TRX1 TRX2 YLR043C	P22217	4.79	103	11103.8	0	0	Cytoplasm. Golgi apparatus membrane; Peripheral membrane protein. Nucleus.	ER to Golgi vesicle-mediated transport; Golgi membrane; cell redox homeostasis; cellular response to oxidative stress; cytosol; deoxyribonucleotide biosynthetic process; disulfide oxidoreductase activity; electron carrier activity; electron transport chain; fungal-type vacuole; glycerol ether metabolic process; mitochondrial intermembrane space; nucleus; protein deglutathionylation; protein disul…	0.002037	0.000204305	0.00508554	0.000758321	0.400547	0.00185157	0.000736765	0.00368525	0.000376001	0.502427	0.00273236	0.00128975	0.00399765	0.000810447	0.683491	0.00444075	0.00134369	0.0039201	0.000706341	1.13281	0.00464863	0.000600022	0.00473822	0.00101468	0.981093	0.00450134	0.00152572	0.00391231	0.000400459	1.15056
Eukaryotic translation initiation factor 5 OS=Saccharomyces cerevisiae (strain ATCC 204508 / S288c) GN=TIF5 PE=1 SV=1	TIF5 YPR041W YP3085.05	P38431	4.94	405	45261.1	0	0	0	GDP-dissociation inhibitor activity; GTP binding; GTPase activator activity; RNA metabolic process; cytosolic small ribosomal subunit; mature ribosome assembly; multi-eIF complex; negative regulation of translational initiation; translation initiation factor activity	---	---	---	---	---	0	0	0.000116259	7.81401e-05	0	8.64003e-05	1.11492e-05	0.000181451	9.43493e-05	0.476162	9.48304e-05	9.4968e-05	0.000341531	6.98824e-05	0.277663	0.000324241	4.63678e-05	0.000159549	4.6406e-05	2.03223	0.000266059	0.000265264	0.000370845	0.000147238	0.71744
Peptidyl-prolyl cis-trans isomerase C, mitochondrial OS=Saccharomyces cerevisiae (strain ATCC 204508 / S288c) GN=CPR3 PE=1 SV=1	CPR3 CYP3 YML078W	P25719	6.35	182	17567	5	0	Mitochondrion matrix.	apoptotic process; mitochondrial matrix; mitochondrion; peptide binding; peptidyl-prolyl cis-trans isomerase activity; protein folding	0.00438879	0.00081773	0.00343349	0.000811071	1.27823	0.00307527	0.000338336	0.000988657	0.000157592	3.11056	0.00239448	0.000811268	0.000726556	0.00034917	3.29566	0.006608	0.00030748	0.00121503	4.12565e-05	5.43856	0.00754688	0.00043931	0.00121122	0.000278149	6.23083	0.00719039	0.00103038	0.00118676	0.000199617	6.05886
Importin subunit beta-4 OS=Saccharomyces cerevisiae (strain ATCC 204508 / S288c) GN=KAP123 PE=1 SV=1	KAP123 YRB4 YER110C	P40069	4.54	1113	122601	0	0	Cytoplasm. Nucleus. Nucleus â€º nuclear pore complex.	NLS-bearing substrate import into nucleus; cytoplasm; mRNA transport; nuclear localization sequence binding; nuclear pore; protein transporter activity; regulation of pseudohyphal growth; ribosomal protein import into nucleus	0	0	5.37588e-05	9.31129e-05	0	7.97647e-05	3.9128e-05	0.000119014	5.09167e-05	0.670214	8.23882e-05	1.03896e-05	5.67013e-05	5.07675e-05	1.45302	1.1519e-05	1.99515e-05	1.6337e-05	2.82964e-05	0.705088	0	0	1.59265e-05	2.75855e-05	0	0	0	5.86497e-05	2.85046e-05	0
Ankyrin repeat-containing protein YCR051W OS=Saccharomyces cerevisiae (strain ATCC 204508 / S288c) GN=YCR051W PE=1 SV=1	YCR051W YCR51W	P25631	4.51	222	24694.2	0	0	0	cytoplasm; nucleus	0	0	0.00189799	0.000235224	0	0	0	0.000513555	1.39957e-05	0	0	0	0.000466698	9.09642e-05	0	0	0	4.3106e-05	7.46617e-05	0	0.000323261	8.7379e-06	0	0	---	0.000270302	0.000248313	8.44757e-05	7.31962e-05	3.19976
Ran-specific GTPase-activating protein 1 OS=Saccharomyces cerevisiae (strain ATCC 204508 / S288c) GN=YRB1 PE=1 SV=1	YRB1 CST20 HTN1 SFO1 YDR002W YD8119.08	P41920	5.85	201	22953	0	0	Cytoplasm. Nucleus.	G1/S transition of mitotic cell cycle; GTPase activator activity; RNA export from nucleus; Ran GTPase binding; cytoplasm; nucleus; positive regulation of GTPase activity; protein import into nucleus; ubiquitin-dependent protein catabolic process	0	0	0.000212628	0.000368282	0	6.29999e-05	0.000109119	0.00104316	0.000243933	0.0603932	0.000357451	0.000216468	0.00118233	8.88079e-05	0.302328	0	0	0.000682302	0.000219867	0	0.000179182	0.000182318	0.000415253	0.000245566	0.431502	0	0	0.000790345	0.000200149	0
Probable aconitate hydratase 2 OS=Saccharomyces cerevisiae (strain ATCC 204508 / S288c) GN=ACO2 PE=1 SV=1	ACO2 YJL200C J0327	P39533	6.5	789	86583.2	4	0	0	4 iron, 4 sulfur cluster binding; aconitate hydratase activity; citrate hydro-lyase (cis-aconitate-forming) activity; isocitrate hydro-lyase (cis-aconitate-forming) activity; metal ion binding; mitochondrion; tricarboxylic acid cycle	---	---	---	---	---	3.2086e-05	2.77873e-05	8.40252e-05	1.90692e-05	0.381862	5.50414e-05	4.78557e-05	2.69104e-05	2.3307e-05	2.04536	---	---	---	---	---	---	---	---	---	---	---	---	---	---	---
Cruciform DNA-recognizing protein 1 OS=Saccharomyces cerevisiae (strain ATCC 204508 / S288c) GN=CRP1 PE=1 SV=1	CRP1 YHR146W	P38845	6.92	465	51115.7	0	0	0	DNA binding; nucleus	0.00073092	0.000107159	0.000674886	0.000178115	1.08303	0.000163328	0.000141446	0.000287568	0.000100572	0.567964	0.00013637	0.000181719	0.000289867	4.87111e-05	0.470459	0.00128912	0.00048943	0.000970432	2.77083e-05	1.3284	0.00056452	0.000156456	0.00125608	0.00024926	0.44943	0.000497071	0.000148127	0.00138934	0.00013481	0.357775
Histidine biosynthesis trifunctional protein OS=Saccharomyces cerevisiae (strain ATCC 204508 / S288c) GN=HIS4 PE=1 SV=3	HIS4 YCL030C YCL183 YCL30C	P00815	5.18	799	87721.2	3	Amino-acid biosynthesis; L-histidine biosynthesis; L-histidine from 5-phospho-alpha-D-ribose 1-diphosphate: step 2/9. Amino-acid biosynthesis; L-histidine biosynthesis; L-histidine from 5-phospho-alpha-D-ribose 1-diphosphate: step 3/9. Amino-acid biosynthesis; L-histidine biosynthesis; L-histidine from 5-phospho-alpha-D-ribose 1-diphosphate: step 9/9.	0	ATP binding; NAD binding; cytoplasm; histidine biosynthetic process; histidinol dehydrogenase activity; phosphoribosyl-AMP cyclohydrolase activity; phosphoribosyl-ATP diphosphatase activity; zinc ion binding	0.000115743	3.36346e-05	0	0	---	0.000223087	5.71237e-05	0.000212948	5.71052e-05	1.04761	0	0	0.000141188	5.49812e-05	0	---	---	---	---	---	---	---	---	---	---	---	---	---	---	---
Cluster of ADP-ribosylation factor 1 OS=Saccharomyces cerevisiae (strain ATCC 204508 / S288c) GN=ARF1 PE=1 SV=3 (ARF1_YEAST)	ARF1 YDL192W D1244	P11076	6.96	181	20398.3	0	0	Golgi apparatus.	ER to Golgi vesicle-mediated transport; GTP binding; GTPase activity; Golgi apparatus; Golgi to plasma membrane transport; intra-Golgi vesicle-mediated transport; macroautophagy; protein transport; small GTPase mediated signal transduction	0.000511951	0.000261318	0	0	---	0.000703091	0.000245436	0.000208804	8.59599e-05	3.36722	0.00194356	0.000413392	0.000288705	0.000109518	6.73201	0.000211882	0.000211576	0	0	---	0.000329765	0.000112702	5.006e-05	8.67064e-05	6.58741	0.000332126	0.000415856	0.000104555	9.05596e-05	3.17656
Myosin light chain 1 OS=Saccharomyces cerevisiae (strain ATCC 204508 / S288c) GN=MLC1 PE=1 SV=1	MLC1 YGL106W G3080	P53141	4.55	149	16444.5	0	0	Bud neck. Bud tip.	calcium ion binding; cellular bud neck; cellular bud tip; cytokinesis, actomyosin contractile ring assembly; myosin V binding; myosin complex; protein localization; vesicle; vesicle targeting	0.000270907	0.000276453	0.0146841	0.00273091	0.0184491	0.00136718	0.000742514	0.00383846	0.00105952	0.356179	0.000360582	0.000322663	0.0029131	0.000770512	0.12378	0.000342686	0.000593549	0.00593404	0.000310944	0.0577491	0.00031864	0.000128429	0.00767392	0.000618066	0.0415225	0.000161671	0.000280023	0.00823712	0.000414785	0.0196272
Glucose-6-phosphate 1-epimerase OS=Saccharomyces cerevisiae (strain ATCC 204508 / S288c) GN=YMR099C PE=1 SV=1	YMR099C YM6543.06C	Q03161	5.75	297	33955.9	5	0	0	carbohydrate binding; cellular carbohydrate metabolic process; cytoplasm; glucose-6-phosphate 1-epimerase activity; nucleus	0.00102986	0.000553053	0	0	---	0.000513756	4.03085e-06	0.000579164	0.000207984	0.887065	0.000546903	0.000175614	0.000766666	8.01163e-05	0.713353	0.000363337	0.000222882	0	0	---	4.11116e-05	7.12073e-05	0	0	---	4.32093e-05	7.48407e-05	0	0	---
Methionine aminopeptidase 1 OS=Saccharomyces cerevisiae (strain ATCC 204508 / S288c) GN=MAP1 PE=1 SV=2	MAP1 YLR244C L9672.12	Q01662	8.09	387	42378.2	3	0	Cytoplasm.	cytosolic ribosome; mRNA binding; metal ion binding; metalloaminopeptidase activity; negative regulation of gene expression; protein initiator methionine removal involved in protein maturation; proteolysis	---	---	---	---	---	0.000262528	0.000112425	0.000220948	6.02141e-06	1.18819	0.000471959	0.000209262	0.000135027	5.12217e-05	3.49529	---	---	---	---	---	---	---	---	---	---	---	---	---	---	---
[NU+] prion formation protein 1 OS=Saccharomyces cerevisiae (strain ATCC 204508 / S288c) GN=NEW1 PE=1 SV=1	NEW1 YPL226W P1445	Q08972	5.6	1196	134331	0	0	Cytoplasm. Nucleus.	ATP binding; ATPase activity; mitochondrion; nucleus; poly(A)+ mRNA export from nucleus; polysome; ribosomal small subunit biogenesis	---	---	---	---	---	---	---	---	---	---	0.000153854	0.000133253	0	0	---	---	---	---	---	---	---	---	---	---	---	---	---	---	---	---
Prefoldin subunit 6 OS=Saccharomyces cerevisiae (strain ATCC 204508 / S288c) GN=YKE2 PE=1 SV=1	YKE2 GIM1 PFD6 YLR200W L8167.8	P52553	4.7	114	13283.9	0	0	Nucleus.	nucleus; prefoldin complex; protein folding; tubulin binding; tubulin complex assembly	0	0	0.00386559	4.41459e-05	0	0.000556686	0.000189696	0.00358178	0.000100797	0.155421	0.000200259	0.000346858	0.00400128	0.000684294	0.0500487	0.001246	0.000826186	0.0041979	0.000810006	0.296815	0.0012548	0.00028737	0.00467613	0.000564942	0.268341	0.00107256	0.000471169	0.00501379	0.000725415	0.213922
Nicotinamidase OS=Saccharomyces cerevisiae (strain ATCC 204508 / S288c) GN=PNC1 PE=1 SV=1	PNC1 YGL037C	P53184	5.81	216	24993.3	3	Cofactor biosynthesis; nicotinate biosynthesis; nicotinate from nicotinamide: step 1/1.	Cytoplasm. Nucleus. Peroxisome.	chromatin silencing at rDNA; chromatin silencing at telomere; metal ion binding; nicotinamidase activity; nicotinate nucleotide salvage; nucleus; peroxisome; replicative cell aging	0.00151912	0.000278155	0	0	---	0.000472055	0.000272814	0.00105162	0.000204339	0.448884	0.000600321	0.000157034	0.000957329	0.000228345	0.627079	0.0010325	0.000231175	0.000171763	0.000148975	6.01118	0.000940812	9.2116e-05	8.20657e-05	0.000142142	11.4641	0.000970512	0.000290023	8.52052e-05	0.00014758	11.3903
DNA-directed RNA polymerase I subunit RPA135 OS=Saccharomyces cerevisiae (strain ATCC 204508 / S288c) GN=RPA135 PE=1 SV=1	RPA135 RPA2 RRN2 SRP3 YPR010C YP9531.03C	P22138	7.56	1203	135742	2	0	Nucleus â€º nucleolus.	DNA binding; DNA-directed RNA polymerase I complex; DNA-directed RNA polymerase activity; metal ion binding; ribonucleoside binding; transcription of nuclear large rRNA transcript from RNA polymerase I promoter	---	---	---	---	---	---	---	---	---	---	9.48857e-06	1.64347e-05	1.77807e-05	3.07971e-05	0.533644	---	---	---	---	---	---	---	---	---	---	---	---	---	---	---
T-complex protein 1 subunit theta OS=Saccharomyces cerevisiae (strain ATCC 204508 / S288c) GN=CCT8 PE=1 SV=1	CCT8 YJL008C J1374	P47079	5.51	568	61662.3	0	0	Cytoplasm.	ATP binding; chaperonin-containing T-complex; protein folding; unfolded protein binding	---	---	---	---	---	0.000112355	0.000103327	3.27159e-05	5.66656e-05	3.43425	0.000257346	0.000107908	1.72375e-05	2.98562e-05	14.9295	---	---	---	---	---	---	---	---	---	---	---	---	---	---	---
Protein HMF1 OS=Saccharomyces cerevisiae (strain ATCC 204508 / S288c) GN=HMF1 PE=1 SV=1	HMF1 HIG1 YER057C	P40037	5.25	129	13906	0	0	Cytoplasm. Nucleus.	cytosol; deaminase activity; mitochondrial intermembrane space; nucleus	0.00582426	0.00129902	0.0267299	0.0104599	0.217893	0.00177425	1.39205e-05	0.00287032	0.000422771	0.618137	0.000607905	0.000261943	0.0037686	0.000654754	0.161308	0.00957575	0.00116935	0.00527735	0.000314093	1.8145	0.0090685	0.000809449	0.0049712	0.000486702	1.82421	0.00970025	0.00130443	0.0059571	0.00101055	1.62835
Long-chain-fatty-acid--CoA ligase 1 OS=Saccharomyces cerevisiae (strain ATCC 204508 / S288c) GN=FAA1 PE=1 SV=1	FAA1 YOR317W O6136	P30624	7.53	700	77866.3	6	0	0	ATP binding; endoplasmic reticulum; lipid particle; long-chain fatty acid transport; long-chain fatty acid-CoA ligase activity; long-chain fatty-acyl-CoA metabolic process; mitochondrial outer membrane; plasma membrane	---	---	---	---	---	---	---	---	---	---	0.000241432	6.91807e-05	0	0	---	---	---	---	---	---	---	---	---	---	---	---	---	---	---	---
Obg-like ATPase 1 OS=Saccharomyces cerevisiae (strain ATCC 204508 / S288c) GN=OLA1 PE=1 SV=1	OLA1 YBR025C YBR0309	P38219	7.05	394	44174.1	0	0	Cytoplasm.	ATP binding; ATPase activity; GTP binding; cytoplasm	---	---	---	---	---	0.00032347	0.000150833	2.48484e-05	4.30386e-05	13.0178	0.000659778	0.000235754	4.96999e-05	8.60828e-05	13.2752	---	---	---	---	---	---	---	---	---	---	---	---	---	---	---
ABC transporter ATP-binding protein ARB1 OS=Saccharomyces cerevisiae (strain ATCC 204508 / S288c) GN=ARB1 PE=1 SV=1	ARB1 YER036C	P40024	6.09	610	68377.1	0	0	Cytoplasm. Nucleus.	ATP binding; ATPase activity, uncoupled; cytoplasm; nucleus; ribosomal small subunit export from nucleus	---	---	---	---	---	0.000187913	0.000108859	0	0	---	0.000362897	5.10896e-05	0	0	---	---	---	---	---	---	---	---	---	---	---	---	---	---	---	---
ATP-dependent molecular chaperone HSC82 OS=Saccharomyces cerevisiae (strain ATCC 204508 / S288c) GN=HSC82 PE=1 SV=4	HSC82 YMR186W YM8010.16	P15108	4.77	705	80768.6	0	0	Cytoplasm. Mitochondrion.	'de novo' protein folding; ATP binding; ATPase activity, coupled; box C/D snoRNP assembly; mitochondrion; plasma membrane; proteasome assembly; protein refolding; response to stress; telomere maintenance; unfolded protein binding	0.00103877	0.000735581	0.000185395	0.000201655	5.60302	0.00113656	0.000146225	0.00181791	0.0001269	0.6252	0.00154977	0.000513611	0.00201975	8.13071e-05	0.767309	0.00233611	0.00083844	0.00112008	0.000189664	2.08566	0.00217259	0.000144979	0.00102708	8.78347e-05	2.11532	0.00207661	0.000284545	0.00086369	0.000133153	2.40435
Transcription initiation factor TFIID subunit 2 OS=Saccharomyces cerevisiae (strain ATCC 204508 / S288c) GN=TAF2 PE=1 SV=3	TAF2 TAF150 TSM1 YCR042C YCR42C YCR724	P23255	5.46	1407	161471	0	0	Nucleus.	RNA polymerase II transcriptional preinitiation complex assembly; chromatin binding; regulation of transcription, DNA-dependent; transcription factor TFIID complex	---	---	---	---	---	---	---	---	---	---	8.11282e-06	1.40518e-05	3.60788e-05	3.23833e-05	0.224864	---	---	---	---	---	---	---	---	---	---	---	---	---	---	---
Actin cytoskeleton-regulatory complex protein PAN1 OS=Saccharomyces cerevisiae (strain ATCC 204508 / S288c) GN=PAN1 PE=1 SV=2	PAN1 DIM2 MDP3 MIP3 YIR006C YIB6C	P32521	5.17	1480	160268	0	0	Cell membrane; Peripheral membrane protein; Cytoplasmic side. Endosome membrane; Peripheral membrane protein; Cytoplasmic side. Cytoplasm â€º cytoskeleton â€º actin patch.	actin cortical patch; actin cortical patch assembly; axial cellular bud site selection; bipolar cellular bud site selection; calcium ion binding; endocytosis; endosome membrane; mating projection tip; nucleus; plasma membrane	0	0	4.16891e-05	3.67334e-05	0	3.45638e-05	3.9765e-05	0	0	---	2.49025e-05	2.71403e-05	1.43462e-05	1.24252e-05	1.73583	2.59502e-05	2.59879e-05	1.90747e-05	1.94057e-05	1.36045	3.19889e-05	2.77204e-05	1.80994e-05	1.79672e-05	1.76741	4.10053e-05	2.73633e-05	0	0	---
Alcohol dehydrogenase 2 OS=Saccharomyces cerevisiae (strain ATCC 204508 / S288c) GN=ADH2 PE=1 SV=3	ADH2 ADR2 YMR303C YM9952.05C	P00331	6.26	348	36600.7	1	0	Cytoplasm.	NADH oxidation; alcohol dehydrogenase (NAD) activity; amino acid catabolic process to alcohol via Ehrlich pathway; cytoplasm; ethanol metabolic process; zinc ion binding	0.00931094	0.000443753	0.000672136	4.48907e-05	13.8528	0.00314548	0.000631015	0.00427531	0.00049466	0.735732	0.00294057	0.000564284	0.0061108	0.000910596	0.481208	0.00289989	0.000692786	0.000924932	0.000218586	3.13525	0.0023378	0.000150937	0.00073608	0.000107448	3.17602	0.00267973	0.000631972	0.000539323	5.51255e-05	4.96869
Eukaryotic peptide chain release factor subunit 1 OS=Saccharomyces cerevisiae (strain ATCC 204508 / S288c) GN=SUP45 PE=1 SV=2	SUP45 SAL4 SUP1 YBR143C YBR1120	P12385	4.94	437	49005.6	0	0	Cytoplasm.	cytokinesis; cytosol; translation release factor activity, codon specific; translation release factor complex	---	---	---	---	---	0.000145629	5.09068e-05	8.53425e-05	9.73372e-05	1.70641	0.000200465	0.00013654	4.89478e-05	8.47801e-05	4.09549	---	---	---	---	---	---	---	---	---	---	---	---	---	---	---
60S ribosomal protein L36-B OS=Saccharomyces cerevisiae (strain ATCC 204508 / S288c) GN=RPL36B PE=1 SV=3	RPL36B RPL39B YPL249C-A YPL249BC	O14455	11.6	100	11004	0	0	Cytoplasm.	RNA binding; cytoplasmic translation; cytosolic large ribosomal subunit; structural constituent of ribosome	0.0032209	0.00317044	0.000512859	0.000888297	6.28028	0.00775205	0.00150549	0.00284783	0.000475594	2.72209	0.0125897	0.00160641	0.00350142	0.000305674	3.59559	0.00894721	0.00112156	0.000727674	0.000403013	12.2956	0.0074254	0.000741734	0.000649487	0.000589529	11.4327	0.00698254	0.00122833	0.00056075	0.000278616	12.4522
Ran GTPase-activating protein 1 OS=Saccharomyces cerevisiae (strain ATCC 204508 / S288c) GN=RNA1 PE=1 SV=2	RNA1 YMR235C YM9959.17C	P11745	4.53	407	45815.8	0	0	Cytoplasm.	RNA import into nucleus; Ran GTPase activator activity; chromatin silencing at telomere; cytosol; integral to membrane; nucleus; protein import into nucleus; rRNA export from nucleus; rRNA metabolic process; ribosomal subunit export from nucleus; tRNA metabolic process	---	---	---	---	---	---	---	---	---	---	0.000336583	4.29756e-05	0.000176504	3.4662e-05	1.90694	6.96367e-05	0.000120614	0	0	---	0	0	0	0	---	2.95934e-05	5.12573e-05	0	0	---
NADP-dependent alcohol dehydrogenase 6 OS=Saccharomyces cerevisiae (strain ATCC 204508 / S288c) GN=ADH6 PE=1 SV=1	ADH6 YMR318C YM9924.10C	Q04894	6.28	360	39617.5	1	0	0	alcohol dehydrogenase (NADP+) activity; alcohol metabolic process; furaldehyde metabolic process; hydroxymethylfurfural reductase (NADH) activity; hydroxymethylfurfural reductase (NADPH) activity; zinc ion binding	0.000333123	0.000206686	0	0	---	0.000530332	0.000185386	0.000394479	6.91326e-05	1.34439	0.000403958	0.000159401	0.000317505	6.30437e-05	1.27229	0.000118092	0.000204542	0	0	---	0	0	0	0	---	0	0	0	0	---
Cell wall protein ECM33 OS=Saccharomyces cerevisiae (strain ATCC 204508 / S288c) GN=ECM33 PE=1 SV=3	ECM33 YBR078W YBR0727	P38248	4.68	429	39698.7	0	0	Cell membrane; Lipid-anchor â€º GPI-anchor. Secreted â€º cell wall.	anchored to membrane; extracellular region; fungal-type cell wall; fungal-type cell wall organization; mitochondrion; plasma membrane	0.000272642	0.000149635	0.00128769	0.000386857	0.211729	0.000267586	0.000180076	0.000532373	7.82695e-05	0.502629	0.000361562	0.000171102	0.000529397	7.97024e-05	0.68297	0.000155461	5.78319e-05	0.000498907	0.000281112	0.311604	0.000140253	5.12479e-05	0.000495345	0.000155963	0.283142	0.000229619	5.4902e-05	0.000566992	9.01891e-05	0.404978
2-isopropylmalate synthase OS=Saccharomyces cerevisiae (strain ATCC 204508 / S288c) GN=LEU4 PE=1 SV=1	LEU4 YNL104C N2173	P06208	5.7	619	68408.9	2	Amino-acid biosynthesis; L-leucine biosynthesis; L-leucine from 3-methyl-2-oxobutanoate: step 1/4.	Cytoplasm. Mitochondrion.	2-isopropylmalate synthase activity; leucine biosynthetic process; mitochondrion	---	---	---	---	---	0.000123235	6.13058e-05	0.000108326	9.59509e-05	1.13764	0.000149347	8.14952e-05	0.00011872	6.1731e-05	1.25798	---	---	---	---	---	---	---	---	---	---	---	---	---	---	---
Uncharacterized protein YGR169C-A OS=Saccharomyces cerevisiae (strain ATCC 204508 / S288c) GN=YGR169C-A PE=1 SV=1	YGR169C-A	Q3E772	9.99	92	10494.9	0	0	0	0	0.00472771	0.000944013	0.00115943	0.000444256	4.07763	0.00096691	0.000235509	0.000513199	0.00016802	1.88408	0.00139732	0.000311173	0.00133089	0.000506436	1.04991	0.000694961	0.000636233	0	0	---	0.000912761	0.00024447	0	0	---	0.00106098	0.000194091	0	0	---
Rab GDP-dissociation inhibitor OS=Saccharomyces cerevisiae (strain ATCC 204508 / S288c) GN=GDI1 PE=1 SV=1	GDI1 SEC19 YER136W	P39958	5.66	451	51206.4	0	0	Cytoplasm.	GTPase activator activity; Rab GDP-dissociation inhibitor activity; cytoplasm; positive regulation of GTPase activity; protein transport; vesicle-mediated transport	0.00020409	0.00021566	3.92848e-05	3.40845e-05	5.19513	0.000168747	0.000145419	0.000187955	0.000124122	0.897805	0.000247336	0.000147485	0.000162594	0.000109049	1.52118	---	---	---	---	---	---	---	---	---	---	---	---	---	---	---
Histone H1 OS=Saccharomyces cerevisiae (strain ATCC 204508 / S288c) GN=HHO1 PE=1 SV=1	HHO1 YPL127C LPI17C	P53551	10.22	258	27803.6	0	0	Nucleus. Chromosome.	DNA binding; negative regulation of DNA recombination; negative regulation of chromatin silencing; nuclear nucleosome; nucleosome assembly	9.87263e-05	0.000170999	0	0	---	0.000591456	0.000147492	0.000256532	0.00025219	2.30558	0.00143612	0.000108348	0	0	---	---	---	---	---	---	---	---	---	---	---	---	---	---	---	---
Protein MET17 OS=Saccharomyces cerevisiae (strain ATCC 204508 / S288c) GN=MET17 PE=1 SV=3	MET17 MET25 YLR303W L8003.1	P06106	5.98	444	48540.5	2	Amino-acid biosynthesis; L-cysteine biosynthesis; L-cysteine from L-serine: step 2/2.	Cytoplasm.	O-acetylhomoserine aminocarboxypropyltransferase activity; cysteine synthase activity; cytoplasm; plasma membrane; pyridoxal phosphate binding	0.000737222	0.000194559	1.92514e-05	3.33445e-05	38.2943	0.000172208	8.7265e-05	0.000854038	0.000131133	0.20164	0.000138623	0.000113106	0.00056305	0.000162955	0.2462	---	---	---	---	---	---	---	---	---	---	---	---	---	---	---
Glutamine--fructose-6-phosphate aminotransferase [isomerizing] OS=Saccharomyces cerevisiae (strain ATCC 204508 / S288c) GN=GFA1 PE=1 SV=4	GFA1 YKL104C YKL457	P14742	6.01	717	79915.5	2	Nucleotide-sugar biosynthesis; UDP-N-acetyl-alpha-D-glucosamine biosynthesis; alpha-D-glucosamine 6-phosphate from D-fructose 6-phosphate: step 1/1.	0	UDP-N-acetylglucosamine biosynthetic process; carbohydrate binding; cytoplasm; fungal-type cell wall chitin biosynthetic process; glutamine metabolic process; glutamine-fructose-6-phosphate transaminase (isomerizing) activity	---	---	---	---	---	---	---	---	---	---	0.000208022	5.89356e-05	1.46963e-05	2.54547e-05	14.1548	---	---	---	---	---	---	---	---	---	---	---	---	---	---	---
60S acidic ribosomal protein P1-beta OS=Saccharomyces cerevisiae (strain ATCC 204508 / S288c) GN=RPP1B PE=1 SV=3	RPP1B L12EIIB RPL44P RPLA3 YDL130W	P10622	3.84	106	10536.4	0	0	Cytoplasm.	cytoplasmic translation; cytosolic large ribosomal subunit; structural constituent of ribosome; translational elongation	0.00223305	0.00098733	0.0258363	0.00767635	0.0864309	0.000721323	0.000365525	0.0104285	0.00216815	0.0691684	0.000660229	8.5197e-05	0.00505371	0.000540245	0.130642	0.00151352	0.000463888	0.0491617	0.00451478	0.0307866	0.00249509	0.000763281	0.0574174	0.00190343	0.0434553	0.00139024	0.000349683	0.0553397	0.00318635	0.0251219
Vesicle-associated membrane protein-associated protein SCS2 OS=Saccharomyces cerevisiae (strain ATCC 204508 / S288c) GN=SCS2 PE=1 SV=3	SCS2 YER120W	P40075	4.85	244	26794.5	0	0	Endoplasmic reticulum membrane; Single-pass type IV membrane protein. Nucleus membrane; Single-pass type IV membrane protein.	FFAT motif binding; cellular bud tip; chromatin silencing at telomere; endoplasmic reticulum inheritance; endoplasmic reticulum membrane organization; integral to endoplasmic reticulum membrane; negative regulation of transcription factor import into nucleus; nuclear membrane; phosphatidylinositol binding; phospholipid biosynthetic process; regulation of intracellular lipid transport; regulation …	0.000696985	0.000232274	0.00028535	0.000319516	2.44256	0.000521597	9.47535e-05	0.000974625	9.43712e-05	0.535177	0.00049686	0.000289072	0.000806051	9.34828e-05	0.616412	0.000279094	0.000210972	0.000302599	6.93037e-05	0.922323	0.00019907	0.000172408	0.000563807	2.30989e-05	0.353082	0.00010519	0.000182194	0.000578498	0.000207149	0.181833
Protein SPA2 OS=Saccharomyces cerevisiae (strain ATCC 204508 / S288c) GN=SPA2 PE=1 SV=1	SPA2 PEA1 YLL021W L1209	P23201	5.07	1466	163143	0	0	Cell tip.	cell tip; cellular bud neck; cellular bud tip; cytoskeletal regulatory protein binding; incipient cellular bud site; invasive filamentous growth; mating projection assembly; mating projection tip; polarisome; pseudohyphal growth; regulation of cell shape; regulation of initiation of mating projection growth; regulation of termination of mating projection growth	8.68738e-06	1.5047e-05	1.74918e-05	3.02966e-05	0.496655	0	0	1.95305e-05	1.92834e-05	0	2.31081e-05	2.13678e-05	1.45909e-05	2.52721e-05	1.58374	0	0	3.1509e-05	1.12402e-05	0	3.23856e-05	1.30532e-05	2.4318e-05	2.7662e-05	1.33176	5.76817e-05	5.58247e-05	2.58179e-05	2.23619e-05	2.23417
Glycine cleavage system H protein, mitochondrial OS=Saccharomyces cerevisiae (strain ATCC 204508 / S288c) GN=GCV3 PE=1 SV=3	GCV3 YAL044C FUN40	P39726	4.08	170	13366.7	0	0	Mitochondrion.	glycine catabolic process; glycine cleavage complex; glycine decarboxylation via glycine cleavage system; mitochondrion; one-carbon metabolic process; protein lipoylation	0	0	0.000410273	0.000428486	0	0.00112607	0.00082063	0.00116928	0.000316743	0.96305	0.000604383	0.000363813	0.00146177	0.000391931	0.413459	0.000301662	0.000522494	0.000434969	0.00010297	0.693525	0.000626765	0.000343265	0.00021087	0.000182652	2.97228	0	0	0.000327798	0.000283918	0
WW domain-containing protein WWM1 OS=Saccharomyces cerevisiae (strain ATCC 204508 / S288c) GN=WWM1 PE=1 SV=1	WWM1 YFL010C	P43582	4.26	211	22655.3	0	0	Cytoplasm. Nucleus. Mitochondrion.	apoptotic process; mitochondrion; nucleus	6.03588e-05	0.000104544	0.00219596	0.000672568	0.0274862	0.000180788	1.41844e-06	0.000316563	8.75143e-05	0.571097	0	0	0.000635268	0.000164097	0	0	0	0.000435051	0.000191381	0	0.000167777	0.000164941	0.00012946	0.000126157	1.29598	0.000291869	0.000105234	0.000176914	7.34144e-05	1.64978
N-terminal acetyltransferase A complex subunit NAT1 OS=Saccharomyces cerevisiae (strain ATCC 204508 / S288c) GN=NAT1 PE=1 SV=2	NAT1 AAA1 YDL040C D2720	P12945	8.86	854	98774	0	0	Cytoplasm.	N-terminal protein amino acid acetylation; NatA complex; mitochondrion	---	---	---	---	---	---	---	---	---	---	2.5426e-05	2.21066e-05	3.73857e-05	3.7572e-05	0.6801	---	---	---	---	---	---	---	---	---	---	---	---	---	---	---
Protein transport protein SEC31 OS=Saccharomyces cerevisiae (strain ATCC 204508 / S288c) GN=SEC31 PE=1 SV=3	SEC31 WEB1 YDL195W D1229	P38968	5.49	1273	138717	0	0	Cytoplasmic vesicle â€º COPII-coated vesicle membrane; Peripheral membrane protein; Cytoplasmic side. Endoplasmic reticulum membrane; Peripheral membrane protein; Cytoplasmic side.	COPII vesicle coat; COPII-coated vesicle budding; endoplasmic reticulum membrane; mating projection tip; protein transport; structural molecule activity	5.03116e-05	4.59436e-05	0	0	---	4.98525e-05	1.69877e-05	8.91675e-05	2.0135e-05	0.559088	2.08614e-05	3.6133e-05	1.59687e-05	1.38572e-05	1.30639	2.2264e-05	3.85625e-05	7.15327e-05	5.34556e-05	0.311243	0	0	6.54109e-05	2.43406e-05	0	9.46152e-06	1.63878e-05	6.64186e-05	2.25122e-05	0.142453
PKHD-type hydroxylase TPA1 OS=Saccharomyces cerevisiae (strain ATCC 204508 / S288c) GN=TPA1 PE=1 SV=1	TPA1 YER049W	P40032	5.23	644	74041.4	1	0	Nucleus.	L-ascorbic acid binding; iron ion binding; nuclear-transcribed mRNA catabolic process, deadenylation-dependent decay; nucleus; oxidoreductase activity, acting on paired donors, with incorporation or reduction of molecular oxygen, 2-oxoglutarate as one donor, and incorporation of one atom each of oxygen into both donors; oxidoreductase activity, acting on single donors with incorporation of molecu…	---	---	---	---	---	9.88039e-05	3.44906e-05	0	0	---	0.000106939	4.76465e-05	4.95767e-05	4.98237e-05	2.15704	---	---	---	---	---	---	---	---	---	---	---	---	---	---	---
Vacuolar protein sorting-associated protein 13 OS=Saccharomyces cerevisiae (strain ATCC 204508 / S288c) GN=VPS13 PE=1 SV=1	VPS13 SOI1 VPT2 YLL040C	Q07878	5.41	3144	357849	0	0	Golgi apparatus â€º trans-Golgi network.	Golgi apparatus; ascospore-type prospore membrane assembly; extrinsic to membrane; late endosome to vacuole transport; mitochondrion; prospore membrane; protein retention in Golgi apparatus; protein targeting to vacuole	---	---	---	---	---	4.02445e-06	6.97055e-06	6.2279e-06	1.0787e-05	0.646198	0	0	6.70307e-06	1.16101e-05	0	0	0	2.8917e-06	5.00858e-06	0	3.68811e-06	6.38799e-06	1.4578e-05	1.79191e-05	0.252991	0	0	2.9269e-06	5.06954e-06	0
Centromere-binding protein 1 OS=Saccharomyces cerevisiae (strain ATCC 204508 / S288c) GN=CBF1 PE=1 SV=2	CBF1 CEP1 CP1 CPF1 YJR060W J1730	P17106	4.93	351	39387.7	0	0	Nucleus. Mitochondrion. Chromosome â€º centromere.	RNA polymerase II activating transcription factor binding; RNA polymerase II core promoter proximal region sequence-specific DNA binding; RNA polymerase II core promoter proximal region sequence-specific DNA binding transcription factor activity involved in negative regulation of transcription; RNA polymerase II core promoter proximal region sequence-specific DNA binding transcription factor acti…	3.6284e-05	6.28458e-05	0.000688627	9.96769e-05	0.0526904	0.000398726	0.00027282	0.000135567	4.78629e-05	2.94118	3.78298e-05	6.55232e-05	0.000446179	0.000189926	0.0847863	4.03734e-05	6.99288e-05	0.000212031	9.97121e-05	0.190413	0.000102228	2.76327e-06	0.000102131	8.8464e-05	1.00095	0.000212323	0.000113653	0.000106858	9.25901e-05	1.98696
Hsp90 co-chaperone Cdc37 OS=Saccharomyces cerevisiae (strain ATCC 204508 / S288c) GN=CDC37 PE=1 SV=2	CDC37 SMO1 YDR168W YD9489.03	P06101	4.93	506	58385	0	0	Cytoplasm.	MAPK cascade involved in osmosensory signaling pathway; cell division; cytoplasm; protein stabilization; regulation of cell cycle; regulation of stress-activated MAPK cascade; spindle pole body duplication associated with nuclear envelope; unfolded protein binding	2.51694e-05	4.35946e-05	0.00017801	8.39049e-05	0.141393	0.000250488	0.000155609	0.000261565	8.13861e-05	0.957652	0.000293554	0.000296869	0	0	---	0.000129245	8.56561e-05	0.000362322	7.23188e-05	0.356713	0.00113487	8.39703e-05	0.000327032	0.000110464	3.47021	0.00110515	0.000366409	0.000464257	9.37545e-05	2.38047
Reticulon-like protein 1 OS=Saccharomyces cerevisiae (strain ATCC 204508 / S288c) GN=RTN1 PE=1 SV=1	RTN1 YDR233C	Q04947	9.08	295	32916	0	0	Endoplasmic reticulum membrane; Multi-pass membrane protein.	Golgi apparatus; cortical endoplasmic reticulum; endoplasmic reticulum tubular network maintenance; integral to cytosolic side of endoplasmic reticulum membrane; mitochondrion; nuclear pore complex assembly	0.000308045	0.000197612	0.00137751	0.000230212	0.223624	0.000431422	7.83724e-05	6.46833e-05	5.60748e-05	6.66977	0.00035207	0.000104072	0.00059312	0.000373467	0.59359	0.00257584	0.000611104	0.000917297	0.000659881	2.80808	0.00340312	0.000849315	0.00127189	0.000168237	2.67564	0.00389536	0.000457064	0.00114414	2.13136e-05	3.40463
Sedoheptulose 1,7-bisphosphatase OS=Saccharomyces cerevisiae (strain ATCC 204508 / S288c) GN=SHB17 PE=1 SV=1	SHB17 YKR043C	P36136	5.63	271	31022	3	0	Cytoplasm. Nucleus.	carbohydrate metabolic process; cytoplasm; nucleus; oxidoreductase activity; ribose phosphate biosynthetic process; ribosome biogenesis; sedoheptulose-bisphosphatase activity	0.000388925	9.35796e-05	0	0	---	0.000281486	0.000140031	0.000836281	0.000438502	0.336592	0.000289372	0.000124689	0.000721824	0.00023201	0.40089	---	---	---	---	---	---	---	---	---	---	---	---	---	---	---
Protein SIP18 OS=Saccharomyces cerevisiae (strain ATCC 204508 / S288c) GN=SIP18 PE=1 SV=1	SIP18 YMR175W YM8010.05	P50263	8	79	8873.87	0	0	0	cellular response to water deprivation; cytoplasm; phospholipid binding	0	0	0.00420313	0.00369931	0	---	---	---	---	---	0.00154873	0.00107705	0	0	---	0.00068263	0.000340915	0.000798572	0.000857733	0.854814	0.00134874	0.000738671	0.00012139	0.000210254	11.1107	0.00152915	0.000932814	0.000235129	0.000203654	6.50343
Uncharacterized protein YLR257W OS=Saccharomyces cerevisiae (strain ATCC 204508 / S288c) GN=YLR257W PE=1 SV=1	YLR257W	Q06146	4.82	321	35866.9	0	0	Cytoplasm.	cytoplasm	0	0	0.00447515	0.000507597	0	0.000632553	0.000243635	0.000413059	9.3742e-05	1.53139	0.000413653	0.000716468	0.000739846	4.45922e-05	0.559107	0.00171711	0.000418151	0.0017696	0.000521052	0.970338	0.00350177	0.000136081	0.00119978	0.00030734	2.91869	0.0036865	0.000703721	0.00116613	0.000182047	3.1613
Phosphoribosylaminoimidazole-succinocarboxamide synthase OS=Saccharomyces cerevisiae (strain ATCC 204508 / S288c) GN=ADE1 PE=1 SV=2	ADE1 YAR015W	P27616	5.66	306	34603.4	6	Purine metabolism; IMP biosynthesis via de novo pathway; 5-amino-1-(5-phospho-D-ribosyl)imidazole-4-carboxamide from 5-amino-1-(5-phospho-D-ribosyl)imidazole-4-carboxylate: step 1/2.	0	'de novo' IMP biosynthetic process; ATP binding; cytoplasm; nucleus; phosphoribosylaminoimidazolesuccinocarboxamide synthase activity	---	---	---	---	---	0.000625048	0.000379128	0.000183874	0.000184726	3.39932	0.000218971	8.64698e-05	0.000202766	9.4699e-06	1.07992	---	---	---	---	---	---	---	---	---	---	---	---	---	---	---
Protein APA1 OS=Saccharomyces cerevisiae (strain ATCC 204508 / S288c) GN=APA1 PE=1 SV=4	APA1 DTP1 YCL050C YCL50C	P16550	4.92	321	36361.4	2	0	0	ATP adenylyltransferase activity; ATP binding; bis(5'-nucleosyl)-tetraphosphatase activity; cytoplasm; nucleoside catabolic process; nucleotide biosynthetic process; nucleus; sulfate adenylyltransferase (ADP) activity	---	---	---	---	---	0	0	0.000206529	4.6871e-05	0	0.000214544	9.55899e-05	0.000193291	9.02738e-06	1.10995	0	0	5.63002e-05	4.87601e-05	0	0	0	0.000288661	0.000143655	0	7.75006e-05	6.72185e-05	0.000205532	0.000103546	0.377073
H/ACA ribonucleoprotein complex subunit 4 OS=Saccharomyces cerevisiae (strain ATCC 204508 / S288c) GN=CBF5 PE=1 SV=1	CBF5 YLR175W L9470.11	P33322	9.02	483	54704.8	5	0	Nucleus â€º nucleolus. Chromosome â€º centromere. Cytoplasm â€º cytoskeleton.	90S preribosome; DNA binding; RNA binding; box H/ACA snoRNA 3'-end processing; box H/ACA snoRNP complex; cell division; chromosome, centromeric region; cytoplasm; microtubule; mitosis; pseudouridine synthase activity; rRNA pseudouridine synthesis; snRNA pseudouridine synthesis	---	---	---	---	---	0.000289715	4.67663e-05	9.64513e-05	0.000120005	3.00375	0.000185231	0.000125708	2.0271e-05	3.51104e-05	9.13776	---	---	---	---	---	---	---	---	---	---	---	---	---	---	---
Protein GLC8 OS=Saccharomyces cerevisiae (strain ATCC 204508 / S288c) GN=GLC8 PE=1 SV=1	GLC8 YMR311C YM9924.03C	P41818	4.57	229	26649	0	0	0	chromosome segregation; cytoplasm; enzyme activator activity; glycogen biosynthetic process; nucleus; protein phosphatase inhibitor activity; regulation of phosphoprotein phosphatase activity; regulation of signal transduction	0.000851166	0.000314321	0.00487231	0.00017119	0.174694	0	0	0.000411222	0.000276391	0	0	0	0.000766132	6.39208e-05	0	0.000973396	0.00031932	0.00389766	0.000144866	0.249738	0.00323658	0.000224324	0.00409454	0.000526921	0.790463	0.00330273	0.000790519	0.00401301	0.000139935	0.823008
FACT complex subunit SPT16 OS=Saccharomyces cerevisiae (strain ATCC 204508 / S288c) GN=SPT16 PE=1 SV=1	SPT16 CDC68 SSF1 YGL207W	P32558	4.99	1035	118630	0	0	Nucleus. Chromosome.	DNA repair; DNA replication-independent nucleosome organization; DNA-dependent DNA replication; FACT complex; nuclear chromatin; nucleosome assembly; positive regulation of RNA polymerase II transcriptional preinitiation complex assembly; positive regulation of transcription initiation from RNA polymerase II promoter; regulation of transcription by chromatin organization; replication fork protect…	---	---	---	---	---	---	---	---	---	---	5.83894e-05	5.77428e-05	0	0	---	---	---	---	---	---	---	---	---	---	---	---	---	---	---	---
Protein THO1 OS=Saccharomyces cerevisiae (strain ATCC 204508 / S288c) GN=THO1 PE=1 SV=1	THO1 YER063W	P40040	6.69	218	24137.6	0	0	0	RNA binding; chromatin binding; double-stranded DNA binding; nucleus; poly(A)+ mRNA export from nucleus; ribonucleoprotein complex assembly; transcription, DNA-dependent	0.0011998	0.000349008	0.0011082	0.000200885	1.08266	0.000875009	0.000348797	0.0002592	0.000124429	3.3758	0.000121819	0.000210997	0.000569233	2.65852e-05	0.214005	0.000800681	0.000331452	8.77938e-05	0.000152063	9.12002	0.00021558	0.000242871	0.000339788	0.000315493	0.634453	0.000165256	0.000165752	0.000254873	0.000334147	0.648385
Protein TMA108 OS=Saccharomyces cerevisiae (strain ATCC 204508 / S288c) GN=TMA108 PE=1 SV=1	TMA108 YIL137C	P40462	6.08	946	107723	3	0	Cytoplasm.	aminopeptidase activity; cytoplasm; metallopeptidase activity; proteolysis; ribosome biogenesis; zinc ion binding	---	---	---	---	---	0	0	7.93745e-05	6.05719e-05	0	7.9747e-05	6.99371e-05	2.14885e-05	1.86472e-05	3.71115	---	---	---	---	---	---	---	---	---	---	---	---	---	---	---
Uncharacterized protein YLR361C-A OS=Saccharomyces cerevisiae (strain ATCC 204508 / S288c) GN=YLR361C-A PE=1 SV=1	YLR361C-A	Q3E795	7.96	98	11050.2	0	0	0	0	0.00202104	0.000741041	0.00350184	0.000552391	0.577137	---	---	---	---	---	0.001151	0.00113169	0.00041647	0.000158477	2.76371	0.00439076	0.00182582	0.00140917	0.000272429	3.11584	0.00279827	0.000495556	0.00103257	0.000192076	2.71	0.00374158	0.000913672	0.000379086	0.00032834	9.86999
1,3-beta-glucan synthase component FKS1 OS=Saccharomyces cerevisiae (strain ATCC 204508 / S288c) GN=FKS1 PE=1 SV=2	FKS1 CND1 CWH53 ETG1 GLS1 GSC1 PBR1 YLR342W L8300.6	P38631	6.84	1876	214851	2	0	Mitochondrion. Cell membrane; Multi-pass membrane protein.	(1->3)-beta-D-glucan biosynthetic process; 1,3-beta-D-glucan synthase activity; 1,3-beta-D-glucan synthase complex; actin cortical patch; cellular bud neck; cellular bud tip; integral to membrane; mitochondrion; positive regulation of endocytosis; regulation of cell shape; regulation of cell size	---	---	---	---	---	2.05179e-05	3.5538e-05	0	0	---	8.78441e-05	0.000108065	0	0	---	---	---	---	---	---	---	---	---	---	---	---	---	---	---	---
4-aminobutyrate aminotransferase OS=Saccharomyces cerevisiae (strain ATCC 204508 / S288c) GN=UGA1 PE=1 SV=2	UGA1 YGR019W	P17649	6.34	471	52946.2	2	0	Cytoplasm.	4-aminobutyrate transaminase activity; cytoplasm; gamma-aminobutyric acid catabolic process; intracellular; nitrogen utilization; pyridoxal phosphate binding	5.82703e-05	0.000100927	0	0	---	0.000108231	4.78174e-05	0.000121304	6.0489e-05	0.892233	0.000201535	0.000234686	0.000196015	5.80606e-05	1.02816	8.73944e-05	9.03981e-05	0	0	---	0	0	0	0	---	2.72466e-05	4.71925e-05	0	0	---
Restriction of telomere capping protein 3 OS=Saccharomyces cerevisiae (strain ATCC 204508 / S288c) GN=RTC3 PE=1 SV=1	RTC3 YHR087W	P38804	5.05	111	12009.5	0	0	Cytoplasm. Nucleus.	RNA metabolic process; cytoplasm; nucleus; rRNA processing	0	0	0.00593217	0.000953973	0	0.000576441	0.000722589	0.00369108	0.00102293	0.156172	0.000102836	0.000178116	0.00380976	0.000140903	0.0269926	0.00245702	0.00118241	0.00571898	0.000374852	0.429625	0.0019439	0.000360251	0.00650964	0.000588054	0.298618	0.00176779	0.000494973	0.00589837	0.00103138	0.299708
60S ribosomal protein L34-A OS=Saccharomyces cerevisiae (strain ATCC 204508 / S288c) GN=RPL34A PE=1 SV=1	RPL34A YER056C-A YER056BC	P87262	10.84	121	13639.1	0	0	Cytoplasm.	cytoplasmic translation; cytosolic large ribosomal subunit; structural constituent of ribosome	---	---	---	---	---	0.00199466	0.000469481	0.00101489	0.000334357	1.96539	0.00171974	0.000233379	8.09164e-05	0.000140151	21.2533	0.000445684	0.000222581	0	0	---	0	0	0	0	---	0	0	0	0	---
Serine hydroxymethyltransferase, mitochondrial OS=Saccharomyces cerevisiae (strain ATCC 204508 / S288c) GN=SHM1 PE=1 SV=2	SHM1 SHMT1 YBR263W YBR1732	P37292	8.2	490	51487.7	2	One-carbon metabolism; tetrahydrofolate interconversion.	Mitochondrion.	L-serine metabolic process; glycine hydroxymethyltransferase activity; glycine metabolic process; mitochondrion; one-carbon metabolic process; pyridoxal phosphate binding; serine family amino acid biosynthetic process; tetrahydrofolate interconversion	0.000345431	0.000110786	3.74277e-05	6.48267e-05	9.2293	2.58222e-05	4.47254e-05	0.000407666	0.000104016	0.0633416	0.00016612	4.18852e-05	0.000124458	0.000108001	1.33475	0.000193949	0.000138177	0	0	---	2.49186e-05	4.31604e-05	1.84915e-05	3.20283e-05	1.34757	9.97121e-05	4.14625e-05	0	0	---
2-dehydropantoate 2-reductase OS=Saccharomyces cerevisiae (strain ATCC 204508 / S288c) GN=PAN5 PE=1 SV=1	PAN5 YHR063C	P38787	6.21	379	42821.3	1	Cofactor biosynthesis; (R)-pantothenate biosynthesis; (R)-pantoate from 3-methyl-2-oxobutanoate: step 2/2.	0	2-dehydropantoate 2-reductase activity; NADP binding; cytoplasm; pantothenate biosynthetic process	---	---	---	---	---	---	---	---	---	---	0.000130306	0.000113808	0.000162158	0.000140843	0.803574	---	---	---	---	---	---	---	---	---	---	---	---	---	---	---
Isocitrate lyase OS=Saccharomyces cerevisiae (strain ATCC 204508 / S288c) GN=ICL1 PE=1 SV=1	ICL1 YER065C	P28240	5.98	557	62408.8	4	Carbohydrate metabolism; glyoxylate cycle; (S)-malate from isocitrate: step 1/2.	Cytoplasm.	cytoplasm; glyoxylate cycle; isocitrate lyase activity; tricarboxylic acid cycle	---	---	---	---	---	2.27161e-05	3.93455e-05	0.000288985	0.000101101	0.0786065	1.84903e-05	3.20262e-05	0.000214955	0.000240438	0.0860196	0	0	9.94514e-05	4.93652e-05	0	0.000278498	2.9278e-05	6.49536e-05	7.25258e-05	4.28764	0.000286	3.45944e-05	0	0	---
Glucose-6-phosphate 1-dehydrogenase OS=Saccharomyces cerevisiae (strain ATCC 204508 / S288c) GN=ZWF1 PE=1 SV=4	ZWF1 MET19 YNL241C N1110	P11412	5.92	505	57390.4	1	Carbohydrate degradation; pentose phosphate pathway; D-ribulose 5-phosphate from D-glucose 6-phosphate (oxidative stage): step 1/3.	0	NADP binding; cytoplasm; glucose-6-phosphate dehydrogenase activity; pentose-phosphate shunt, oxidative branch; response to hydrogen peroxide	0.000158272	0.000137254	0	0	---	0.000302501	7.78159e-05	0.000130291	8.28522e-05	2.32173	0.000169782	0.000155708	8.34632e-05	0.000144562	2.03421	---	---	---	---	---	---	---	---	---	---	---	---	---	---	---
60S ribosomal protein L9-A OS=Saccharomyces cerevisiae (strain ATCC 204508 / S288c) GN=RPL9A PE=1 SV=2	RPL9A RPL8A RPL9 YGL147C	P05738	9.73	191	21569	0	0	Cytoplasm.	cytoplasmic translation; cytosolic large ribosomal subunit; rRNA binding; structural constituent of ribosome	0.000202929	0.000351483	0	0	---	0.00199358	0.000679329	0.00139372	0.000377133	1.4304	0.00357372	0.00134177	0.00111969	0.000495342	3.1917	---	---	---	---	---	---	---	---	---	---	---	---	---	---	---
Superoxide dismutase [Mn], mitochondrial OS=Saccharomyces cerevisiae (strain ATCC 204508 / S288c) GN=SOD2 PE=1 SV=1	SOD2 YHR008C	P00447	6.07	233	23083	1	0	Mitochondrion matrix.	age-dependent response to reactive oxygen species involved in chronological cell aging; metal ion binding; mitochondrial matrix; reactive oxygen species metabolic process; replicative cell aging; superoxide dismutase activity; superoxide metabolic process	0.000801493	0.00053002	0	0	---	0.000546984	0.000255056	0.000489865	0.000124419	1.1166	0.00035093	0.000467648	0.000445342	9.24771e-05	0.788001	0.00631545	0.00110023	0.00499671	0.00095888	1.26392	0.00568859	0.000375845	0.00340972	0.000408771	1.66835	0.00589915	0.000596059	0.00282261	0.000716476	2.08996
Non-histone chromosomal protein 6B OS=Saccharomyces cerevisiae (strain ATCC 204508 / S288c) GN=NHP6B PE=1 SV=3	NHP6B NHPB YBR089C-A YBR090BC	P11633	9.9	99	11476	0	0	Nucleus. Chromosome.	DNA binding, bending; DNA repair; RNA polymerase III transcriptional preinitiation complex assembly; chromatin remodeling; chromosome; nucleosome binding; nucleus; regulation of transcription, DNA-dependent; sequence-specific DNA binding; transcription from RNA polymerase II promoter	0.00223053	0.00179945	0.0029095	0.000441887	0.766638	0.000898542	0.000218857	0.00211047	0.000159171	0.425754	0.000810943	0.000122357	0.00115457	0.00022925	0.702379	0.000286284	0.000495859	0.00346986	0.00129727	0.082506	0	0	0.00463307	0.000279668	0	0	0	0.00455271	0.000809058	0
D-lactate dehydrogenase [cytochrome] 3 OS=Saccharomyces cerevisiae (strain ATCC 204508 / S288c) GN=DLD3 PE=1 SV=1	DLD3 YEL071W	P39976	6.41	496	55225	1	0	Cytoplasm.	D-lactate dehydrogenase (cytochrome) activity; UDP-N-acetylmuramate dehydrogenase activity; cytoplasm; filamentous growth; flavin adenine dinucleotide binding; lactate metabolic process	0.000641472	0.000307142	3.57206e-05	3.09921e-05	17.958	0.000128644	9.02118e-05	0.000134667	3.72289e-05	0.955274	0.00017437	0.000172767	0.000144833	2.84424e-05	1.20394	0.000383318	0.000261868	0	0	---	0.000169733	0.000169302	0	0	---	0.000377473	0.00031319	0	0	---
Signal transduction protein MDG1 OS=Saccharomyces cerevisiae (strain ATCC 204508 / S288c) GN=MDG1 PE=1 SV=1	MDG1 YNL173C N1673	P53885	5.69	366	40278.1	0	0	Cell membrane; Peripheral membrane protein.	cytoplasm; nucleus; pheromone-dependent signal transduction involved in conjugation with cellular fusion; plasma membrane	0	0	0.000463419	0.000204501	0	6.91966e-05	0.000119852	0.000283388	0.000112338	0.244176	0	0	0.00025719	0.000156985	0	0	0	0.000657793	0.000180721	0	6.46771e-05	5.60467e-05	0.000822041	0.000173753	0.0786787	6.55225e-05	5.67459e-05	0.000970522	0.000310418	0.0675127
Diphosphomevalonate decarboxylase OS=Saccharomyces cerevisiae (strain ATCC 204508 / S288c) GN=MVD1 PE=1 SV=2	MVD1 ERG19 MPD YNR043W N3427	P32377	5.52	396	44115.9	4	Isoprenoid biosynthesis; isopentenyl diphosphate biosynthesis via mevalonate pathway; isopentenyl diphosphate from (R)-mevalonate: step 3/3.	0	ATP binding; cytoplasm; diphosphomevalonate decarboxylase activity; isopentenyl diphosphate biosynthetic process, mevalonate pathway; sterol biosynthetic process	0.000630827	0.000125255	0	0	---	0.00025701	5.6455e-05	0.000119555	8.19067e-05	2.14973	0.000112483	0.000133102	0.000280704	0.000222098	0.400718	---	---	---	---	---	---	---	---	---	---	---	---	---	---	---
Thioredoxin-2 OS=Saccharomyces cerevisiae (strain ATCC 204508 / S288c) GN=TRX2 PE=1 SV=3	TRX2 TRX1 YGR209C G7746	P22803	4.79	104	11072.7	0	0	Cytoplasm. Golgi apparatus membrane; Peripheral membrane protein. Nucleus.	ER to Golgi vesicle-mediated transport; Golgi membrane; cell redox homeostasis; cellular response to oxidative stress; cytosol; deoxyribonucleotide biosynthetic process; disulfide oxidoreductase activity; electron carrier activity; electron transport chain; fungal-type vacuole; glycerol ether metabolic process; nucleus; protein deglutathionylation; protein disulfide oxidoreductase activity; prote…	0.00189736	0.00100248	0.00300672	0.000648716	0.63104	0.00146697	0.000729775	0.0010069	0.000176959	1.45692	0.0013113	0.00118679	0.00306997	0.000327028	0.427139	0.00553189	0.00161687	0.00515363	0.00136155	1.0734	0.00586661	0.000413706	0.0048409	0.00179466	1.21188	0.00554587	0.000901829	0.00475444	0.0018079	1.16646
Nucleoside diphosphate kinase OS=Saccharomyces cerevisiae (strain ATCC 204508 / S288c) GN=YNK1 PE=1 SV=1	YNK1 NDK1 YNK YKL067W YKL333	P36010	8.65	153	17166.7	2	0	Cytoplasm. Mitochondrion intermembrane space.	ATP binding; CTP biosynthetic process; DNA repair; GTP biosynthetic process; UTP biosynthetic process; cytosol; metal ion binding; mitochondrial intermembrane space; nucleoside diphosphate kinase activity; nucleoside triphosphate biosynthetic process; response to DNA damage stimulus	0.00146341	0.000651992	0.000237247	0.000110235	6.16829	0.00049755	0.000246654	0.0014279	0.000281596	0.34845	0.000288729	0.00030391	0.00122738	0.000398061	0.235239	0.00128969	0.000403917	0.000723387	0.000183038	1.78285	0.0014789	0.00031496	0.000778536	9.92543e-05	1.8996	0.00152172	0.000111168	0.000860145	0.000288372	1.76914
Nuclear transport factor 2 OS=Saccharomyces cerevisiae (strain ATCC 204508 / S288c) GN=NTF2 PE=1 SV=2	NTF2 YER009W	P33331	4.5	125	14453.1	0	0	Cytoplasm.	cytoplasm; integral to membrane; nuclear envelope; protein import into nucleus	0.00178184	0.00034178	0.00566805	0.00291887	0.314366	0.000509119	0.00017797	0.00297414	0.000686625	0.171182	0.000247178	0.000428126	0.00314682	0.000364957	0.0785485	0.00212426	0.000272496	0.00361206	0.000678358	0.588101	0.00124206	0.000324742	0.00364139	0.00127033	0.341094	0.0013897	0.000678084	0.00351518	0.0017911	0.395343
COPII coat assembly protein SEC16 OS=Saccharomyces cerevisiae (strain ATCC 204508 / S288c) GN=SEC16 PE=1 SV=2	SEC16 YPL085W LPF1W	P48415	5.21	2195	241696	0	0	Endoplasmic reticulum membrane; Peripheral membrane protein; Cytoplasmic side.	COPII vesicle coating; ER to Golgi transport vesicle membrane; autophagy; endoplasmic reticulum exit site; endoplasmic reticulum membrane; protein anchor; protein localization to endoplasmic reticulum exit site; protein transport	1.21378e-05	1.0526e-05	3.23971e-05	1.24135e-05	0.374657	---	---	---	---	---	0	0	1.9418e-05	2.23524e-05	0	0	0	1.23753e-05	1.24261e-05	0	3.80378e-05	1.86902e-05	3.39876e-05	2.94696e-05	1.11917	8.35495e-05	2.75473e-05	4.26343e-05	6.65569e-06	1.95968
Cytosine deaminase OS=Saccharomyces cerevisiae (strain ATCC 204508 / S288c) GN=FCY1 PE=1 SV=1	FCY1 YPR062W YP9499.17	Q12178	5.66	158	17507	3	Pyrimidine metabolism; UMP biosynthesis via salvage pathway; uracil from cytosine: step 1/1.	0	UMP salvage; cytidine metabolic process; cytoplasm; cytosine deaminase activity; cytosine metabolic process; nucleus; pyrimidine-containing compound salvage; zinc ion binding	0.000250394	0.000245471	0.00148751	0.000395124	0.168331	0.000564135	0.000280538	0.000360788	9.83243e-06	1.56362	0.00143171	0.00053189	0.000392699	1.83404e-05	3.64582	0.00115099	0.000530751	0.000530897	0.000368318	2.16801	0.00151936	0.000377576	0.000230233	9.22299e-05	6.59923	0.00200014	0.00068843	0.000353823	0.000171419	5.65295
GTP-binding nuclear protein GSP1/CNR1 OS=Saccharomyces cerevisiae (strain ATCC 204508 / S288c) GN=GSP1 PE=1 SV=1	GSP1 CNR1 CST17 YLR293C L8003.19	P32835	6.11	219	24679.2	0	0	Nucleus.	GTP binding; GTPase activity; cytoplasm; exonucleolytic trimming to generate mature 3'-end of 5.8S rRNA from tricistronic rRNA transcript (SSU-rRNA, 5.8S rRNA, LSU-rRNA); integral to membrane; intracellular protein transport; nucleocytoplasmic transport; nucleus; nucleus organization; regulation of chromatin silencing at telomere; small GTPase mediated signal transduction	0.000235978	0.000408726	0	0	---	0.000407766	0.000270046	0.000432868	6.64649e-05	0.94201	0.000997207	9.29214e-05	0.000239331	0.000173448	4.16665	0.000486325	0.000121508	0	0	---	0.000383443	0.0001027	0	0	---	0.000289393	0.000367729	4.27994e-05	7.41307e-05	6.76163
Phosphoglucomutase-1 OS=Saccharomyces cerevisiae (strain ATCC 204508 / S288c) GN=PGM1 PE=1 SV=1	PGM1 YKL127W	P33401	6.81	570	63111.9	5	0	Cytoplasm.	UDP-glucose metabolic process; cytosol; galactose catabolic process; glucose 1-phosphate metabolic process; glucose 6-phosphate metabolic process; glucose metabolic process; glycogen biosynthetic process; magnesium ion binding; phosphoglucomutase activity; trehalose biosynthetic process	0.000822528	0.000394195	0	0	---	0.000356521	7.48295e-05	6.65316e-05	2.82923e-05	5.35868	0.000480664	6.13721e-05	1.87633e-05	3.2499e-05	25.6172	0.00035121	9.01831e-05	0	0	---	0.000124589	0.000107964	0	0	---	0.000262687	0.00018456	0	0	---
40S ribosomal protein S30-A OS=Saccharomyces cerevisiae (strain ATCC 204508 / S288c) GN=RPS30A PE=1 SV=1	RPS30A YLR287C-A L8003.23 YLR287BC	P0CX33	11.68	63	6987.29	0	0	Cytoplasm.	cytoplasmic stress granule; cytoplasmic translation; cytosolic small ribosomal subunit; structural constituent of ribosome	0.00242585	0.00420169	0	0	---	0.00726066	0.00116641	0	0	---	0.00550702	0.000160368	0.000155411	0.00026918	35.4352	0.00112469	0.00194802	0	0	---	0.000552162	0.000956373	0	0	---	0.000380655	0.000329667	0	0	---
T-complex protein 1 subunit gamma OS=Saccharomyces cerevisiae (strain ATCC 204508 / S288c) GN=CCT3 PE=1 SV=2	CCT3 BIN2 TCP3 YJL014W J1336	P39077	5.81	534	58814.2	0	0	Cytoplasm.	ATP binding; chaperonin-containing T-complex; protein folding; unfolded protein binding	---	---	---	---	---	9.54812e-05	8.26945e-05	7.17089e-05	3.31655e-05	1.33151	0.000142675	0.000127089	0	0	---	---	---	---	---	---	---	---	---	---	---	---	---	---	---	---
Isocitrate dehydrogenase [NAD] subunit 2, mitochondrial OS=Saccharomyces cerevisiae (strain ATCC 204508 / S288c) GN=IDH2 PE=1 SV=1	IDH2 YOR136W O3326 YOR3326W	P28241	7.24	369	37798.2	1	0	Mitochondrion matrix.	NAD binding; RNA binding; glutamate biosynthetic process; isocitrate dehydrogenase (NAD+) activity; isocitrate metabolic process; magnesium ion binding; mitochondrial isocitrate dehydrogenase complex (NAD+); tricarboxylic acid cycle	---	---	---	---	---	0.000517851	0.000210809	0.000180365	0.000116861	2.87113	0.000755613	0.000107018	0.00018978	0.000199642	3.98152	---	---	---	---	---	---	---	---	---	---	---	---	---	---	---
60S ribosomal protein L38 OS=Saccharomyces cerevisiae (strain ATCC 204508 / S288c) GN=RPL38 PE=1 SV=1	RPL38 YLR325C L8543.2	P49167	10.93	78	8695.34	0	0	Cytoplasm.	cytoplasmic translation; cytosolic large ribosomal subunit; structural constituent of ribosome	0.00115796	0.00111833	0.00068299	0.000315063	1.69543	0.00374555	0.000996317	0.000730828	1.9917e-05	5.12507	0.00211104	0.000489961	0.000544418	0.000471519	3.87761	0.0010194	6.12464e-05	0.000352964	0.000345664	2.88812	0.00136603	0.000748141	0	0	---	0.00110987	0.000565412	0	0	---
Thiamine metabolism regulatory protein THI3 OS=Saccharomyces cerevisiae (strain ATCC 204508 / S288c) GN=THI3 PE=1 SV=1	THI3 KID1 YDL080C	Q07471	5.95	609	68366.4	4	Amino-acid degradation; Ehrlich pathway.	Nucleus.	amino acid catabolic process via Ehrlich pathway; branched-chain amino acid catabolic process; lyase activity; magnesium ion binding; nucleus; positive regulation of thiamine biosynthetic process; positive regulation of transcription from RNA polymerase II promoter; thiamine pyrophosphate binding	0.000254578	0.000440941	0	0	---	0	0	0.000530076	1.93823e-05	0	9.37171e-05	0.000162323	0.000439943	6.64542e-05	0.213021	---	---	---	---	---	---	---	---	---	---	---	---	---	---	---
Cluster of Constitutive acid phosphatase OS=Saccharomyces cerevisiae (strain ATCC 204508 / S288c) GN=PHO3 PE=1 SV=2 (PPA3_YEAST)	PHO3 YBR092C YBR0813	P24031	4.4	467	51011.4	3	0	0	acid phosphatase activity; cell wall-bounded periplasmic space; thiamine-containing compound metabolic process	5.87694e-05	0.000101792	0.00103911	0.000249094	0.0565574	0	0	0.000959279	0.000204185	0	2.84331e-05	4.92476e-05	0.00057304	8.03731e-05	0.0496181	0	0	0.000454055	4.19885e-05	0	2.48296e-05	4.30061e-05	0.000392301	6.50514e-05	0.0632922	0	0	0.000238654	0.000206707	0
Cell wall protein CWP1 OS=Saccharomyces cerevisiae (strain ATCC 204508 / S288c) GN=CWP1 PE=1 SV=2	CWP1 YKL096W YJU1 YKL443	P28319	4.28	239	20274.4	0	0	Secreted â€º cell wall. Membrane; Lipid-anchor â€º GPI-anchor.	anchored to membrane; ascospore-type prospore membrane assembly; cellular birth scar; extracellular region; fungal-type cell wall organization; prospore membrane; structural constituent of cell wall	0	0	0.00103878	0.000498145	0	0	0	0.0017121	0.000225216	0	0	0	0.00146749	0.000255693	0	0.000166114	0.000160554	0.00245743	0.000362009	0.0675963	0	0	0.00237962	0.00013203	0	0	0	0.00238853	0.000317345	0
ATP-dependent RNA helicase SUB2 OS=Saccharomyces cerevisiae (strain ATCC 204508 / S288c) GN=SUB2 PE=1 SV=1	SUB2 YDL084W	Q07478	5.35	446	50309	3	0	Nucleus.	ATP binding; ATP-dependent RNA helicase activity; RNA binding; chromatin silencing at telomere; chromosome, telomeric region; cytoplasm; mRNA 3'-end processing; mRNA export from nucleus; mRNA splicing, via spliceosome; spliceosomal complex; transcription elongation from RNA polymerase II promoter; transcription export complex; transcription-coupled nucleotide-excision repair	---	---	---	---	---	0.000341722	8.33214e-05	2.19512e-05	3.80207e-05	15.5673	0.00029324	0.000134623	4.59327e-05	3.9895e-05	6.38412	---	---	---	---	---	---	---	---	---	---	---	---	---	---	---
Threonine dehydratase, mitochondrial OS=Saccharomyces cerevisiae (strain ATCC 204508 / S288c) GN=ILV1 PE=1 SV=2	ILV1 YER086W	P00927	UNDEFINED	576	0	4	Amino-acid biosynthesis; L-isoleucine biosynthesis; 2-oxobutanoate from L-threonine: step 1/1.	Mitochondrion.	L-threonine ammonia-lyase activity; isoleucine biosynthetic process; mitochondrion; pyridoxal phosphate binding; threonine catabolic process	---	---	---	---	---	0.00017584	0.000201501	6.58386e-05	2.79976e-05	2.67077	0.000235892	7.58497e-05	3.52919e-05	3.06254e-05	6.68403	---	---	---	---	---	---	---	---	---	---	---	---	---	---	---
Tryptophan synthase OS=Saccharomyces cerevisiae (strain ATCC 204508 / S288c) GN=TRP5 PE=1 SV=1	TRP5 YGL026C	P00931	6.05	707	76626.1	4	Amino-acid biosynthesis; L-tryptophan biosynthesis; L-tryptophan from chorismate: step 5/5.	0	cytoplasm; nucleus; tryptophan synthase activity	---	---	---	---	---	---	---	---	---	---	9.47738e-05	3.74254e-05	2.89759e-05	2.51671e-05	3.27078	0.000223101	8.99146e-05	7.88709e-05	4.16838e-05	2.82868	0.000151577	4.72796e-05	3.96645e-05	4.07313e-05	3.82148	0.000135984	0.000156239	3.95308e-05	3.97748e-05	3.43994
Coproporphyrinogen-III oxidase OS=Saccharomyces cerevisiae (strain ATCC 204508 / S288c) GN=HEM13 PE=1 SV=2	HEM13 YDR044W YD5112.02	P11353	6.32	328	37711.6	1	Porphyrin-containing compound metabolism; protoporphyrin-IX biosynthesis; protoporphyrinogen-IX from coproporphyrinogen-III (O2 route): step 1/1.	Cytoplasm.	coproporphyrinogen oxidase activity; cytosol; heme biosynthetic process; protein homodimerization activity; protoporphyrinogen IX biosynthetic process	0.000925746	0.000399054	0	0	---	---	---	---	---	---	0.000235683	0.000129779	0.000124433	4.73497e-05	1.89406	0.00132885	0.000174897	0.00159772	0.000445111	0.831714	0.00109315	0.000217854	0.00139739	9.74822e-05	0.78228	0.00127376	0.000116833	0.0014853	7.70924e-05	0.857576
Phospho-2-dehydro-3-deoxyheptonate aldolase, phenylalanine-inhibited OS=Saccharomyces cerevisiae (strain ATCC 204508 / S288c) GN=ARO3 PE=1 SV=1	ARO3 YDR035W YD9673.07	P14843	7.04	370	41069.9	2	Metabolic intermediate biosynthesis; chorismate biosynthesis; chorismate from D-erythrose 4-phosphate and phosphoenolpyruvate: step 1/7.	0	3-deoxy-7-phosphoheptulonate synthase activity; aromatic amino acid family biosynthetic process; chorismate biosynthetic process; mitochondrion; nucleus; response to stress	0.000288704	0.000278761	0	0	---	0.00044707	6.3294e-05	0.000100796	0.000114963	4.43538	0.000642592	0.00065573	0.000199042	0.000135948	3.22842	0.000183901	0.000173508	0	0	---	9.40168e-05	0.000162842	0	0	---	6.51055e-05	0.000112766	0	0	---
Glucan 1,3-beta-glucosidase OS=Saccharomyces cerevisiae (strain ATCC 204508 / S288c) GN=BGL2 PE=1 SV=1	BGL2 SCW9 YGR282C	P15703	4.28	313	31742.9	3	0	Secreted â€º cell wall.	1,3-beta-glucanosyltransferase activity; carbohydrate metabolic process; chitin binding; extracellular region; fungal-type cell wall; fungal-type cell wall organization; glucan endo-1,3-beta-D-glucosidase activity; glucan exo-1,3-beta-glucosidase activity	0.00426981	0.000272634	0.00202065	0.00033125	2.11308	0.000244347	0.000211624	0.00072808	8.69465e-05	0.335604	0.000242628	0.00025537	0.000690921	6.9252e-05	0.351166	0.00229136	0.000500974	0.000556688	0.00011869	4.11605	0.00137413	8.96876e-05	0.000584686	2.95019e-05	2.3502	0.00138118	0.000401731	0.000686715	0.000173737	2.01129
Family of serine hydrolases 1 OS=Saccharomyces cerevisiae (strain ATCC 204508 / S288c) GN=FSH1 PE=1 SV=1	FSH1 YHR049W	P38777	5.92	243	27339.2	3	0	Cytoplasm. Nucleus.	carboxylesterase activity; cytoplasm; hydrolase activity; nucleus	0.000437801	0.000262593	0	0	---	0.00036741	0.000328705	0.000313112	7.03257e-05	1.17342	0.000198644	0.000112115	0.000342061	0.000154811	0.580725	0.000449865	0.000437913	7.67944e-05	6.65713e-05	5.85805	5.02475e-05	8.70312e-05	0	0	---	0.000257566	0.000240141	7.78786e-05	6.74539e-05	3.30727
Heat shock protein SSB2 OS=Saccharomyces cerevisiae (strain ATCC 204508 / S288c) GN=SSB2 PE=1 SV=2	SSB2 YNL209W N1333	P40150	5.37	613	66463.4	0	0	Cytoplasm.	'de novo' cotranslational protein folding; ATP binding; ATPase activity; cellular response to glucose starvation; cytoplasm; cytoplasmic translation; plasma membrane; polysome; rRNA processing; regulation of translational fidelity; ribosomal subunit export from nucleus; unfolded protein binding	0.00338768	0.000359512	0.00144379	0.000784385	2.34639	0.00676114	0.000210495	0.00616066	0.000505647	1.09747	0.00602239	0.00218727	0.00668634	0.00021404	0.900701	0.00440544	0.000736462	0.00207937	0.000468642	2.11864	0.00396046	8.83456e-05	0.00203963	0.000303179	1.94175	0.00396885	0.00038362	0.00204863	7.24314e-05	1.93732
Saccharopine dehydrogenase [NADP(+), L-glutamate-forming] OS=Saccharomyces cerevisiae (strain ATCC 204508 / S288c) GN=LYS9 PE=1 SV=1	LYS9 LYS13 YNR050C N3461	P38999	5.1	446	48917.8	1	Amino-acid biosynthesis; L-lysine biosynthesis via AAA pathway; L-lysine from L-alpha-aminoadipate (fungal route): step 2/3.	0	cytoplasm; lysine biosynthetic process via aminoadipic acid; saccharopine dehydrogenase (NADP+, L-glutamate-forming) activity	8.87047e-05	8.69605e-05	1.91651e-05	3.3195e-05	4.62844	5.75359e-05	9.96551e-05	0.000362897	0.000100736	0.158546	2.55936e-05	4.43294e-05	0.00034744	7.05282e-05	0.0736634	---	---	---	---	---	---	---	---	---	---	---	---	---	---	---
Phosphomannomutase OS=Saccharomyces cerevisiae (strain ATCC 204508 / S288c) GN=SEC53 PE=1 SV=1	SEC53 ALG4 YFL045C	P07283	5.14	254	29062.9	5	Nucleotide-sugar biosynthesis; GDP-alpha-D-mannose biosynthesis; alpha-D-mannose 1-phosphate from D-fructose 6-phosphate: step 2/2.	Cytoplasm.	GDP-mannose biosynthetic process; cytosol; mannose biosynthetic process; phosphomannomutase activity; protein targeting to ER	---	---	---	---	---	0.000550916	8.89297e-05	0.000522015	0.000118469	1.05536	0.0013327	0.000204039	0.000121517	0.000124559	10.9672	---	---	---	---	---	---	---	---	---	---	---	---	---	---	---
6,7-dimethyl-8-ribityllumazine synthase OS=Saccharomyces cerevisiae (strain ATCC 204508 / S288c) GN=RIB4 PE=1 SV=2	RIB4 YOL143C	P50861	6.06	169	18555.5	2	Cofactor biosynthesis; riboflavin biosynthesis; riboflavin from 2-hydroxy-3-oxobutyl phosphate and 5-amino-6-(D-ribitylamino)uracil: step 1/2.	0	6,7-dimethyl-8-ribityllumazine synthase activity; mitochondrial intermembrane space; nucleus; riboflavin biosynthetic process; riboflavin synthase complex; transferase activity	0.00124732	0.000300119	0	0	---	0.000299596	0.000259458	0.00156399	0.000553058	0.191558	0.000348741	0.000416912	0.00146855	6.85867e-05	0.237472	0	0	0.000551447	0.000354467	0	7.14581e-05	0.000123769	0.000280593	0.000355912	0.254668	7.59358e-05	0.000131525	5.54619e-05	9.60629e-05	1.36915
General transcriptional corepressor CYC8 OS=Saccharomyces cerevisiae (strain ATCC 204508 / S288c) GN=CYC8 PE=1 SV=2	CYC8 CRT8 SSN6 YBR112C YBR0908	P14922	4.91	966	107202	0	0	Nucleus.	RNA polymerase II transcription factor binding transcription factor activity involved in negative regulation of transcription; RNA polymerase II transcription factor binding transcription factor activity involved in positive regulation of transcription; chromatin remodeling; histone deacetylase binding; negative regulation of dipeptide transport by negative regulation of transcription from RNA po…	0	0	0.000222775	4.38742e-05	0	0	0	7.84962e-05	7.29734e-05	0	0	0	9.7118e-05	3.51103e-05	0	1.32719e-05	2.29876e-05	0.000201027	5.36537e-05	0.0660203	6.17883e-05	2.11169e-05	0.000151995	4.35193e-05	0.406514	1.23569e-05	2.14027e-05	2.91089e-05	5.04181e-05	0.424505
Translation machinery-associated protein 10 OS=Saccharomyces cerevisiae (strain ATCC 204508 / S288c) GN=TMA10 PE=1 SV=3	TMA10 YLR327C L8543.1	Q06177	9.75	86	9833.78	0	0	Mitochondrion.	cytoplasm; mitochondrion; nucleus	0.00369032	0.00166283	0.00264935	0.00134304	1.39291	0.00251643	0.00103276	0	0	---	0.00360721	0.00170704	0.000609458	0.000441688	5.91872	0.00807465	0.00215493	0.00202609	0.000431975	3.98535	0.00962182	0.00167807	0.00149658	0.000229732	6.42921	0.0120986	0.00118922	0.00141125	0.000799448	8.57302
ATP phosphoribosyltransferase OS=Saccharomyces cerevisiae (strain ATCC 204508 / S288c) GN=HIS1 PE=1 SV=1	HIS1 YER055C	P00498	5.87	297	32266.4	2	Amino-acid biosynthesis; L-histidine biosynthesis; L-histidine from 5-phospho-alpha-D-ribose 1-diphosphate: step 1/9.	Cytoplasm.	ATP binding; ATP phosphoribosyltransferase activity; cytoplasm; histidine biosynthetic process; magnesium ion binding	0.00140768	0.000342578	0	0	---	0.000642161	0.000127703	0.000447308	0.000107553	1.43561	0.000235637	3.0407e-05	0.000486797	5.75915e-05	0.484056	0.000635045	0.000452457	9.10882e-05	9.07178e-05	6.97176	0.000159856	6.44308e-05	0.000152323	0.000100716	1.04946	0.000210373	0.000154596	0	0	---
Protease B inhibitors 2 and 1 OS=Saccharomyces cerevisiae (strain ATCC 204508 / S288c) GN=PBI2 PE=1 SV=3	---	P01095	---	---	---	---	---	---	---	0.000548906	0.000950734	0.0060823	0.0029289	0.0902466	0.000848531	0.000296617	0.00202084	0.000553874	0.419891	0.000780926	0.000305117	0.003727	0.00089502	0.209532	0.00174246	0.000527237	0.0137392	0.000870312	0.126824	0.00637771	0.00101121	0.0103477	0.0019427	0.616343	0.00638116	0.000254495	0.0103801	0.00121151	0.614749
Homoserine kinase OS=Saccharomyces cerevisiae (strain ATCC 204508 / S288c) GN=THR1 PE=1 SV=4	THR1 YHR025W	P17423	5.26	357	38581.2	2	Amino-acid biosynthesis; L-threonine biosynthesis; L-threonine from L-aspartate: step 4/5.	0	ATP binding; homoserine kinase activity; homoserine metabolic process; isoleucine metabolic process; methionine metabolic process; threonine biosynthetic process	0.000506515	0.000398351	0	0	---	0.000320117	0.000183553	0.000262436	0.000241393	1.21979	0.000262077	7.1482e-05	0.000487259	0.00015551	0.53786	0.000568477	0.000337172	0	0	---	0.00010051	2.71683e-06	0	0	---	0.000179736	0.000311312	0	0	---
Nucleoporin NSP1 OS=Saccharomyces cerevisiae (strain ATCC 204508 / S288c) GN=NSP1 PE=1 SV=1	NSP1 YJL041W J1207	P14907	6.03	823	86516	0	0	Nucleus â€º nuclear pore complex. Nucleus membrane; Peripheral membrane protein; Cytoplasmic side. Nucleus membrane; Peripheral membrane protein; Nucleoplasmic side.	NLS-bearing substrate import into nucleus; cell cycle; ncRNA export from nucleus; nuclear membrane; nuclear periphery; nuclear pore central transport channel; nuclear pore nuclear basket; nucleocytoplasmic transporter activity; phospholipid binding; poly(A)+ mRNA export from nucleus; ribosomal large subunit export from nucleus; ribosomal small subunit export from nucleus; structural constituent o…	0	0	0.000107177	6.90843e-05	0	0.000108099	7.03956e-05	3.43404e-05	5.94794e-05	3.14788	0.000109318	0.000157951	0.000165974	0.000101325	0.658646	4.65311e-05	8.05943e-05	0.000322809	7.47036e-05	0.144144	8.66135e-05	4.14432e-05	0.000188051	4.40443e-05	0.460585	0.000160067	0.000152886	0.000215821	8.28305e-05	0.741667
Homocysteine S-methyltransferase 2 OS=Saccharomyces cerevisiae (strain ATCC 204508 / S288c) GN=SAM4 PE=1 SV=1	SAM4 YPL273W	Q08985	5.12	325	36668.6	2	0	Cytoplasm. Nucleus.	L-methionine biosynthetic process from S-adenosylmethionine; S-adenosylhomocysteine metabolic process; cytoplasm; homocysteine S-methyltransferase activity; homocysteine metabolic process; metal ion binding; nucleus	0.00015788	0.000136739	0	0	---	0	0	0.000294757	0.0001432	0	0	0	0.000414732	6.96944e-05	0	---	---	---	---	---	---	---	---	---	---	---	---	---	---	---
Uncharacterized methyltransferase ABP140 OS=Saccharomyces cerevisiae (strain ATCC 204508 / S288c) GN=ABP140 PE=1 SV=3	ABP140 TRM140 YOR239W YOR240W	Q08641	4.62	628	71354.7	2	0	Cytoplasm. Cytoplasm â€º cytoskeleton.	actin cortical patch; actin filament; actin filament binding; actin filament bundle; actin filament bundle assembly; mating projection tip; protein binding, bridging; tRNA (cytosine-3-)-methyltransferase activity	0.000121679	0.000210754	0.000648263	0.000138152	0.187699	2.04307e-05	3.53871e-05	0.000136364	4.57493e-05	0.149826	0	0	0.00020048	0.000106505	0	0	0	7.3907e-05	6.68901e-05	0	0	0	0	0	---	0	0	0	0	---
Histone H2A.1 OS=Saccharomyces cerevisiae (strain ATCC 204508 / S288c) GN=HTA1 PE=1 SV=2	HTA1 H2A1 SPT11 YDR225W YD9934.10	P04911	10.67	132	13858	0	0	Nucleus. Chromosome.	DNA binding; DNA repair; chromatin assembly or disassembly; negative regulation of transcription from RNA polymerase II promoter; nuclear nucleosome; nucleosome assembly; replication fork protection complex	0.00137458	0.00135484	0.00093105	0.000773232	1.47638	0.000964087	0.000336545	0.000931295	0.000228557	1.03521	0.000697468	0.000744761	0.000787292	0.000382516	0.885908	0.000301187	1.80955e-05	6.88751e-05	0.000119295	4.37295	9.1488e-05	0.000158462	0.000477017	0.000459166	0.191792	9.12464e-05	0.000158043	0.000144719	0.00025066	0.630508
Deoxyhypusine synthase OS=Saccharomyces cerevisiae (strain ATCC 204508 / S288c) GN=DYS1 PE=1 SV=1	DYS1 YHR068W	P38791	5.5	387	42892.2	2	Protein modification; eIF5A hypusination.	0	cytoplasm; deoxyhypusine biosynthetic process from spermidine; deoxyhypusine synthase activity; peptidyl-lysine modification to hypusine; transferase activity, transferring alkyl or aryl (other than methyl) groups	---	---	---	---	---	9.85433e-05	9.80875e-05	2.40086e-05	4.1584e-05	4.10451	0.000141712	0.000133638	0.000105055	9.11639e-05	1.34893	---	---	---	---	---	---	---	---	---	---	---	---	---	---	---
Putative reductase 1 OS=Saccharomyces cerevisiae (strain ATCC 204508 / S288c) GN=YPR1 PE=1 SV=1	YPR1 YDR368W D9481.8	Q12458	6.62	312	34755	1	0	Cytoplasm.	D-xylose catabolic process; alditol:NADP+ 1-oxidoreductase activity; arabinose catabolic process; carbonyl reductase (NADPH) activity; cellular response to oxidative stress; cytoplasm; glucose 1-dehydrogenase (NADP+) activity; nucleus	0.000552585	0.000279761	0	0	---	0.000122232	0.000121666	0.000302656	9.90889e-05	0.403863	0	0	0.000366858	0.000128044	0	---	---	---	---	---	---	---	---	---	---	---	---	---	---	---
60S ribosomal protein L39 OS=Saccharomyces cerevisiae (strain ATCC 204508 / S288c) GN=RPL39 PE=1 SV=3	RPL39 RPL46 SPB2 YJL189W J0360	P04650	12.55	51	6210.38	0	0	Cytoplasm.	cytoplasmic translation; cytosolic large ribosomal subunit; structural constituent of ribosome	---	---	---	---	---	0.00374681	0.00152527	0.000566114	0.000576146	6.61846	0.00424821	0.00241492	0	0	---	---	---	---	---	---	---	---	---	---	---	---	---	---	---	---
Coatomer subunit beta' OS=Saccharomyces cerevisiae (strain ATCC 204508 / S288c) GN=SEC27 PE=1 SV=1	SEC27 YGL137W G2827	P41811	4.63	889	99444.8	0	0	Cytoplasm. Golgi apparatus membrane; Peripheral membrane protein; Cytoplasmic side. Cytoplasmic vesicle â€º COPI-coated vesicle membrane; Peripheral membrane protein; Cytoplasmic side.	COPI vesicle coat; ER to Golgi vesicle-mediated transport; intracellular protein transport; late endosome to vacuole transport via multivesicular body sorting pathway; retrograde vesicle-mediated transport, Golgi to ER; structural molecule activity; ubiquitin binding	---	---	---	---	---	4.28979e-05	4.26995e-05	9.60587e-05	8.38191e-05	0.44658	1.1585e-05	2.00659e-05	9.24822e-05	5.33821e-05	0.125268	---	---	---	---	---	---	---	---	---	---	---	---	---	---	---
Proliferating cell nuclear antigen OS=Saccharomyces cerevisiae (strain ATCC 204508 / S288c) GN=POL30 PE=1 SV=1	POL30 YBR088C YBR0811	P15873	4.42	258	28916.1	0	0	Nucleus.	DNA binding; DNA polymerase processivity factor activity; PCNA complex; chromatin silencing at silent mating-type cassette; chromatin silencing at telomere; lagging strand elongation; leading strand elongation; meiotic mismatch repair; mitotic sister chromatid cohesion; nucleotide-excision repair; nucleus; postreplication repair; regulation of DNA replication; replication fork	0.00137845	0.000546914	3.31304e-05	5.73835e-05	41.6069	0.000490617	0.000424887	0.000771886	9.75944e-05	0.635609	0.000358318	0.000195525	0.000681685	0.000377597	0.525635	0.000869433	0.000152018	0.00028062	0.000265798	3.09825	0.000466941	0.000223641	0.000283524	0.000119733	1.64692	0.00086268	0.00028676	0.000362693	0.000165398	2.37854
Ribose-5-phosphate isomerase OS=Saccharomyces cerevisiae (strain ATCC 204508 / S288c) GN=RKI1 PE=1 SV=1	RKI1 YOR095C YOR3174C	Q12189	5.63	258	28258.1	5	Carbohydrate degradation; pentose phosphate pathway; D-ribose 5-phosphate from D-ribulose 5-phosphate (non-oxidative stage): step 1/1.	0	cytoplasm; nucleus; pentose-phosphate shunt; pentose-phosphate shunt, non-oxidative branch; pyridoxine biosynthetic process; ribose-5-phosphate isomerase activity	0.000256608	0.00023176	0	0	---	0.00034479	8.398e-05	0.000146058	0.000252979	2.36064	9.57093e-05	8.35918e-05	0.000429012	0.000401963	0.223092	0.000269399	0.000345641	0	0	---	4.49434e-05	7.78443e-05	0.000107409	0.000105419	0.418432	4.97409e-05	8.61538e-05	0	0	---
40S ribosomal protein S1-A OS=Saccharomyces cerevisiae (strain ATCC 204508 / S288c) GN=RPS1A PE=1 SV=2	RPS1A PLC1 RPS10A YLR441C L9753.9	P33442	10	255	28612.2	0	0	Cytoplasm.	90S preribosome; cytoplasmic translation; cytosolic small ribosomal subunit; maturation of SSU-rRNA from tricistronic rRNA transcript (SSU-rRNA, 5.8S rRNA, LSU-rRNA); structural constituent of ribosome	0.000255756	0.000173508	0	0	---	0.00309033	0.00055444	0.00231168	0.000562369	1.33684	0.0046188	0.00170275	0.00214146	0.000148229	2.15684	0.000201108	0.000348329	0.000178403	0.000218867	1.12727	0.000281951	0.000144651	7.10655e-05	0.000123089	3.96749	0.000339489	0.000172949	7.49133e-05	0.000129754	4.53176
40S ribosomal protein S7-B OS=Saccharomyces cerevisiae (strain ATCC 204508 / S288c) GN=RPS7B PE=1 SV=1	RPS7B YNL096C N2212	P48164	9.92	190	21503.1	0	0	Cytoplasm. Nucleus â€º nucleolus.	90S preribosome; cytoplasmic translation; cytosolic small ribosomal subunit; nucleolus; rRNA processing; ribosomal small subunit biogenesis; small-subunit processome; structural constituent of ribosome	0.000753533	0.000416185	0	0	---	0.00334375	0.000439539	0.00179363	0.000359329	1.86424	0.00315959	7.82777e-05	0.00135694	0.000160442	2.32847	0.000411385	0.000191904	0	0	---	0.0004445	0.000226414	0	0	---	6.33922e-05	0.000109799	0	0	---
Probable family 17 glucosidase SCW4 OS=Saccharomyces cerevisiae (strain ATCC 204508 / S288c) GN=SCW4 PE=1 SV=1	SCW4 YGR279C	P53334	4.42	386	37003.4	3	0	Secreted â€º cell wall.	carbohydrate metabolic process; conjugation with cellular fusion; extracellular region; fungal-type cell wall; glucosidase activity	0.000270497	4.95757e-05	0.000555904	0.000116196	0.486589	9.87986e-05	9.83416e-05	0.000517216	7.73954e-05	0.19102	6.10813e-05	5.415e-05	0.000539575	0.000145215	0.113203	9.93542e-05	9.92105e-05	0.000287969	8.13686e-05	0.345017	0.000182732	0.000180291	0.000308078	3.25299e-05	0.593134	0.000126298	5.14006e-05	0.000386827	0.000160523	0.326498
Ubiquitin-like protein SMT3 OS=Saccharomyces cerevisiae (strain ATCC 204508 / S288c) GN=SMT3 PE=1 SV=1	SMT3 YDR510W D9719.15	Q12306	4.92	101	11130.5	0	0	0	condensed nuclear chromosome; protein sumoylation; protein tag; septin ring	0	0	0.00544869	0.000797618	0	0.00125668	0.000428224	0.00247214	0.00218651	0.508335	0.000889451	0.000481525	0.00246894	0.0011174	0.360257	0.00133512	0.000693523	0.00220983	0.00195121	0.604174	0.00248078	0.000290815	0.00365072	0.000841202	0.679532	0.00191619	0.000999303	0.00333833	0.000216283	0.573997
Tricalbin-3 OS=Saccharomyces cerevisiae (strain ATCC 204508 / S288c) GN=TCB3 PE=1 SV=1	TCB3 YML072C	Q03640	6.69	1545	171076	0	0	Cell membrane; Multi-pass membrane protein.	calcium-dependent phospholipid binding; cellular bud; cortical endoplasmic reticulum; endoplasmic reticulum membrane organization; integral to membrane; lipid binding; metal ion binding; mitochondrion; regulation of phosphatidylinositol dephosphorylation	0	0	3.53647e-05	1.84199e-05	0	---	---	---	---	---	6.75486e-05	9.84284e-05	0	0	---	8.26216e-06	1.43105e-05	1.23877e-05	2.14562e-05	0.666963	0.000124112	3.74402e-05	0	0	---	0.000158421	2.38333e-05	6.06671e-06	1.05078e-05	26.1131
Uncharacterized protein YOL098C OS=Saccharomyces cerevisiae (strain ATCC 204508 / S288c) GN=YOL098C PE=1 SV=1	YOL098C HRF1037	Q12496	4.92	1037	118392	0	0	0	catalytic activity; cytoplasm; metabolic process; metal ion binding	---	---	---	---	---	---	---	---	---	---	2.09391e-05	1.82055e-05	2.03225e-05	3.51996e-05	1.03034	---	---	---	---	---	---	---	---	---	---	---	---	---	---	---
Ras-like protein 2 OS=Saccharomyces cerevisiae (strain ATCC 204508 / S288c) GN=RAS2 PE=1 SV=4	RAS2 ASC1 CTN5 GLC5 YNL098C N2198	P01120	7.21	322	34260.6	0	0	Cell membrane; Lipid-anchor.	GTP binding; GTPase activity; Ras protein signal transduction; activation of adenylate cyclase activity; ascospore formation; endoplasmic reticulum membrane; mitochondrion; plasma membrane; positive regulation of transcription by galactose; pseudohyphal growth; regulation of protein localization; replicative cell aging	---	---	---	---	---	0.000117978	0.000204344	0.000145883	0.000182904	0.808719	8.24737e-05	0.000142849	3.27243e-05	5.66801e-05	2.52026	0.000238721	0.000316125	8.47035e-05	0.000146711	2.81831	0.000111435	3.01213e-06	0.000148911	0.000257921	0.748333	0.000343326	0.000114	0	0	---
ATP synthase subunit d, mitochondrial OS=Saccharomyces cerevisiae (strain ATCC 204508 / S288c) GN=ATP7 PE=1 SV=2	ATP7 YKL016C	P30902	8.92	174	19678.4	0	0	Mitochondrion. Mitochondrion inner membrane.	ATP catabolic process; ATP synthesis coupled proton transport; hydrogen ion transmembrane transporter activity; integral to membrane; mitochondrial proton-transporting ATP synthase, stator stalk; protein complex assembly	0.000219581	0.000380325	0.000147373	0.000255258	1.48997	---	---	---	---	---	0.000461398	6.96172e-05	0.000238853	0.000108101	1.93172	0.00135476	0.000392466	0	0	---	0.000967215	0.000333073	0	0	---	0.000689116	0.00059681	5.38682e-05	9.33024e-05	12.7926
Argininosuccinate synthase OS=Saccharomyces cerevisiae (strain ATCC 204508 / S288c) GN=ARG1 PE=1 SV=3	ARG1 YOL058W O1228	P22768	5.45	420	46927.7	6	Amino-acid biosynthesis; L-arginine biosynthesis; L-arginine from L-ornithine and carbamoyl phosphate: step 2/3.	Cytoplasm.	ATP binding; arginine biosynthetic process; argininosuccinate metabolic process; argininosuccinate synthase activity; citrulline metabolic process; cytosol	0.00015763	0.000142367	0	0	---	---	---	---	---	---	0.000112273	9.95328e-05	0.000343484	0.000111337	0.326866	---	---	---	---	---	---	---	---	---	---	---	---	---	---	---
Protein SSO2 OS=Saccharomyces cerevisiae (strain ATCC 204508 / S288c) GN=SSO2 PE=1 SV=2	SSO2 YMR183C YM8010.13C	P39926	4.8	295	33733.6	0	0	Membrane; Single-pass type IV membrane protein.	Golgi to plasma membrane transport; ascospore-type prospore assembly; endoplasmic reticulum; integral to membrane; intracellular protein transport; phosphatidic acid binding; plasma membrane; prospore membrane; vesicle fusion	0	0	0.000666038	0.000260028	0	0	0	0.000741448	7.0921e-05	0	8.37051e-05	7.31074e-05	0.000699354	0.000156737	0.119689	0.000486271	0.000182986	0.000784045	0.0001713	0.620208	0.000526295	0.000137603	0.000649736	0.000140759	0.810014	0.000374384	1.49312e-05	0.000697422	0.000132324	0.536811
Saccharopepsin OS=Saccharomyces cerevisiae (strain ATCC 204508 / S288c) GN=PEP4 PE=1 SV=1	PEP4 PHO9 PRA1 YPL154C P2585	P07267	4.35	405	35749.8	3	0	Vacuole.	aspartic-type endopeptidase activity; cellular response to starvation; fungal-type vacuole lumen; microautophagy; mitochondrion; peptidase activity; proteolysis involved in cellular protein catabolic process	0.000743048	0.000186591	0.000661618	0.000396527	1.12308	0.000188377	1.47798e-06	0.000657558	5.87419e-05	0.28648	9.83575e-05	0.00017036	0.000514261	0.000138402	0.19126	0.000424315	4.84598e-05	0.000750767	2.54924e-05	0.565175	0.00038302	4.02662e-05	0.000745982	5.18035e-05	0.513444	0.000518139	0.000156579	0.000856967	5.4916e-05	0.604619
Ubiquitin-binding protein CUE5 OS=Saccharomyces cerevisiae (strain ATCC 204508 / S288c) GN=CUE5 PE=1 SV=1	CUE5 YOR042W	Q08412	4.7	411	46869.7	0	0	Cytoplasm.	cytoplasm; ubiquitin binding	0.000223504	0.00014354	0.00118797	0.000222378	0.18814	0.000309658	5.62527e-05	4.52132e-05	7.83116e-05	6.84885	0.000129229	0.000223831	9.71044e-05	0.000108616	1.33082	0.000933244	0.000282171	0.00203521	0.000175681	0.458549	0.00261711	0.000207117	0.00158235	0.000116004	1.65394	0.00220373	0.000145935	0.00157015	0.000333755	1.40352
40S ribosomal protein S1-B OS=Saccharomyces cerevisiae (strain ATCC 204508 / S288c) GN=RPS1B PE=1 SV=3	RPS1B PLC2 RPS10B YML063W	P23248	10.02	255	28681.2	0	0	Cytoplasm.	90S preribosome; cytoplasmic translation; cytosolic small ribosomal subunit; maturation of SSU-rRNA from tricistronic rRNA transcript (SSU-rRNA, 5.8S rRNA, LSU-rRNA); structural constituent of ribosome	---	---	---	---	---	0.00299106	0.000530799	0.00245946	0.000306536	1.21615	0.00460033	0.00129975	0.00206759	0.000144512	2.22497	0.000351721	0.00048499	0.000140876	0.000244004	2.49667	0.000281951	0.000144651	7.10655e-05	0.000123089	3.96749	0.000339489	0.000172949	7.49133e-05	0.000129754	4.53176
Signal recognition particle subunit SRP54 OS=Saccharomyces cerevisiae (strain ATCC 204508 / S288c) GN=SRP54 PE=1 SV=2	SRP54 SRH1 YPR088C P9513.14	P20424	8.73	541	59624.3	0	0	Cytoplasm.	7S RNA binding; GTP binding; GTP catabolic process; GTPase activator activity; GTPase activity; SRP-dependent cotranslational protein targeting to membrane, signal sequence recognition; positive regulation of GTPase activity; signal recognition particle, endoplasmic reticulum targeting; signal sequence binding	---	---	---	---	---	4.67759e-05	8.10182e-05	0	0	---	8.7842e-05	9.57412e-05	0	0	---	0	0	0	0	---	0	0	0	0	---	0	0	3.40191e-05	5.89228e-05	0
Uncharacterized protein YLR179C OS=Saccharomyces cerevisiae (strain ATCC 204508 / S288c) GN=YLR179C PE=1 SV=1	YLR179C L9470.20	Q06252	4.77	201	22151	0	0	0	cytoplasm; nucleus	0.00105457	0.000585552	0	0	---	0.000506399	0.000111522	0.000522823	0.000179977	0.968586	0.000327808	0.000248993	0.000719298	8.5098e-05	0.455733	0.000331529	0.000296564	0	0	---	0.000477863	0.000114122	0	0	---	0.000371309	0.000322047	0	0	---
Serine/threonine-protein kinase PTK2/STK2 OS=Saccharomyces cerevisiae (strain ATCC 204508 / S288c) GN=PTK2 PE=1 SV=1	PTK2 STK2 YJR059W J1725	P47116	8.97	818	91400.4	2	0	Nucleus. Cytoplasm.	ATP binding; G1/S transition of mitotic cell cycle; cellular ion homeostasis; cytoplasm; nucleus; plasma membrane; polyamine transport; protein kinase activity; protein serine/threonine kinase activity; regulation of cell size	0	0	3.13483e-05	5.42969e-05	0	7.75945e-05	5.34601e-05	3.50021e-05	3.45592e-05	2.21685	1.62326e-05	2.81157e-05	3.88381e-05	3.86465e-05	0.417956	1.56052e-05	2.7029e-05	4.4771e-05	1.82968e-05	0.348555	0	0	6.75126e-05	3.36823e-05	0	4.50054e-05	1.79491e-06	6.89783e-05	3.47016e-05	0.652457
Non-histone chromosomal protein 6A OS=Saccharomyces cerevisiae (strain ATCC 204508 / S288c) GN=NHP6A PE=1 SV=1	NHP6A NHPA YPR052C YP9499.09C	P11632	9.76	93	10802.3	0	0	Nucleus. Chromosome.	DNA binding, bending; DNA replication-independent nucleosome organization; RNA polymerase II transcriptional preinitiation complex assembly; RNA polymerase III transcriptional preinitiation complex assembly; chromatin remodeling; chromosome; mismatch repair; nucleosome binding; nucleus; regulation of transcription, DNA-dependent; sequence-specific DNA binding	0.00249412	0.0021454	0.00346225	0.000597408	0.720375	0.00123255	0.000714024	0.00194949	0.000525438	0.632239	0.000531032	0.0004638	0.00134066	0.000606761	0.396098	0.000549632	0.000628803	0.00238413	0.000376594	0.230538	0.000646973	0.000236402	0.00286886	0.000463338	0.225516	0.000257863	0.000223323	0.00312332	0.000126265	0.0825605
Carboxypeptidase Y inhibitor OS=Saccharomyces cerevisiae (strain ATCC 204508 / S288c) GN=TFS1 PE=1 SV=2	TFS1 DKA1 NSP1 YLR178C L9470.19	P14306	6.07	219	24357.3	0	0	Cytoplasm.	fungal-type vacuole lumen; fungal-type vacuole membrane; peptidase inhibitor activity; phospholipid binding; regulation of Ras protein signal transduction; regulation of proteolysis; serine-type endopeptidase inhibitor activity	0.000299783	0.000269881	0.000197993	0.000242426	1.51411	0.000349134	0.000176921	0.000390442	1.06406e-05	0.8942	0.000342799	0.000445599	0.000376139	7.36021e-05	0.91136	0.00114109	0.00022711	0.000754118	0.000199929	1.51315	0.0014768	0.000193376	0.000376901	1.54414e-05	3.91826	0.00139982	8.85852e-05	0.000643756	0.000140419	2.17445
UV excision repair protein RAD23 OS=Saccharomyces cerevisiae (strain ATCC 204508 / S288c) GN=RAD23 PE=1 SV=1	RAD23 YEL037C SYGP-ORF29	P32628	4.25	398	42366.8	0	0	Nucleus. Cytoplasm.	ER-associated protein catabolic process; damaged DNA binding; mitochondrion; nucleotide-excision repair factor 2 complex; nucleotide-excision repair, DNA damage recognition; proteasome complex; protein deglycosylation; ubiquitin binding	3.4479e-05	5.97195e-05	0.000219758	0.00020315	0.156895	0.000477938	0.000251018	0.000477023	7.9664e-05	1.00192	0	0	0.000469958	9.78225e-05	0	9.62189e-05	0.000166656	0.000349384	0.000190394	0.275396	8.74025e-05	0.000151386	0.00052994	0.000142583	0.164929	6.22359e-05	5.40037e-05	0.000470692	3.38314e-05	0.132222
[PIN+] prion protein RNQ1 OS=Saccharomyces cerevisiae (strain ATCC 204508 / S288c) GN=RNQ1 PE=1 SV=2	RNQ1 YCL028W YCL181 YCL28W	P25367	6.13	405	42579.6	0	0	Cytoplasm. Nucleus.	cytosol; nucleus	0	0	0.000370737	0.000230059	0	0.000157963	0.000198055	0.000211128	5.75379e-06	0.748184	0.000322018	0.000161999	0.00030378	0.000126619	1.06004	0	0	0.000660974	0.000165909	0	0	0	0.000698954	0.000134983	0	0	0	0.000578732	4.12759e-05	0
ATP-dependent bile acid permease OS=Saccharomyces cerevisiae (strain ATCC 204508 / S288c) GN=YBT1 PE=1 SV=2	YBT1 BAT1 YLL048C	P32386	8.26	1661	189162	0	0	Vacuole membrane; Multi-pass membrane protein.	ATP binding; bile acid-exporting ATPase activity; calcium ion transport; fungal-type vacuole; integral to membrane; vacuolar membrane	---	---	---	---	---	---	---	---	---	---	2.83894e-05	2.51678e-05	0	0	---	---	---	---	---	---	---	---	---	---	---	---	---	---	---	---
Protein YGP1 OS=Saccharomyces cerevisiae (strain ATCC 204508 / S288c) GN=YGP1 PE=1 SV=2	YGP1 YNL160W N1731	P38616	4.67	354	33351.2	0	0	Secreted.	cell wall assembly; cellular amino acid metabolic process; extracellular region	0.000111238	4.44755e-06	0.00346585	0.00124505	0.0320954	7.14852e-05	0.000123816	0.000512155	0.000138039	0.139577	0.000184016	0.000159992	0.000616454	0.000173616	0.298507	0.000694329	0.000396748	0.00158269	0.000176999	0.438701	0.000572318	0.000100105	0.00110811	0.000185937	0.516481	0.000582961	0.000222327	0.00127124	0.00013909	0.458576
Ankyrin repeat-containing protein YGL242C OS=Saccharomyces cerevisiae (strain ATCC 204508 / S288c) GN=YGL242C PE=1 SV=1	YGL242C HRE181	P53066	4.01	181	20073.7	0	0	0	0	0.000497994	0.000675221	0.00317933	0.000560208	0.156635	0	0	0.00168422	0.000430256	0	0	0	0.00177308	0.000165179	0	0.000495212	0.000534895	0.00142997	0.000280717	0.346309	0.000924494	0.000110238	0.001815	0.000337931	0.509364	0.000737724	0.000286788	0.0021286	0.000487598	0.346576
Uncharacterized protein YMR295C OS=Saccharomyces cerevisiae (strain ATCC 204508 / S288c) GN=YMR295C PE=1 SV=1	YMR295C	Q03559	6.52	197	22178.7	0	0	0	cellular bud; mating projection tip	0.000586844	0.000841975	0.00307338	0.000520266	0.190944	0.00103426	0.000408897	4.78209e-05	8.28283e-05	21.6279	0.00111871	0.000982014	0.000538891	0.000466732	2.07595	0.00165815	0.000536538	0.00108122	0.000382683	1.5336	0.00248869	0.000107172	0.000370639	0.000520638	6.71459	0.00253746	0.000568576	0.000469756	0.000564062	5.40166
ATP synthase subunit gamma, mitochondrial OS=Saccharomyces cerevisiae (strain ATCC 204508 / S288c) GN=ATP3 PE=1 SV=1	ATP3 ATP3a ATP3b YBR039W YBR0408	P38077	9.06	311	30616.2	0	0	Mitochondrion. Mitochondrion inner membrane; Peripheral membrane protein.	ATP synthesis coupled proton transport; integral to membrane; mitochondrial proton-transporting ATP synthase, central stalk; proton-transporting ATP synthase activity, rotational mechanism; proton-transporting ATPase activity, rotational mechanism	---	---	---	---	---	0.000122625	0.000122057	0	0	---	0.000331552	9.65958e-05	0	0	---	0.000123493	0.000123672	3.07702e-05	5.32955e-05	4.0134	0.000348105	0.000123718	0	0	---	0.00027513	6.13598e-05	0	0	---
Inosine triphosphate pyrophosphatase OS=Saccharomyces cerevisiae (strain ATCC 204508 / S288c) GN=HAM1 PE=1 SV=1	HAM1 YJR069C J1811	P47119	5.44	197	22093	3	0	Cytoplasm. Nucleus.	GTP diphosphatase activity; ITP diphosphatase activity; UTP diphosphatase activity; XTP diphosphatase activity; cytoplasm; dATP pyrophosphohydrolase activity; dCTP diphosphatase activity; dGTP diphosphatase activity; dITP diphosphatase activity; dTTP diphosphatase activity; dUTP diphosphatase activity; metal ion binding; nucleotide binding; nucleotide metabolic process; nucleus; purine deoxyribon…	---	---	---	---	---	0.000516681	0.000113786	0.000336527	7.63735e-05	1.53533	0.00035525	4.5842e-05	0.000314956	1.47096e-05	1.12793	0.000194391	0.000336696	0	0	---	0.000122603	0.000212355	0	0	---	0.000312611	0.000112713	0	0	---
Cytochrome c oxidase subunit 6, mitochondrial OS=Saccharomyces cerevisiae (strain ATCC 204508 / S288c) GN=COX6 PE=1 SV=1	COX6 YHR051W	P00427	4.5	148	12627	0	0	Mitochondrion inner membrane.	cytochrome-c oxidase activity; integral to membrane; metal ion binding; mitochondrial electron transport, cytochrome c to oxygen; mitochondrial respiratory chain complex IV	0.000972798	0.000293081	0.00579025	0.000679073	0.168006	0.000429862	0.000392582	0.000960418	0.000176726	0.447578	6.95885e-05	0.000120531	0.00160971	0.000278235	0.0432305	0.00909643	0.000500182	0.0081363	0.000738914	1.11801	0.00784961	0.00100002	0.00686996	9.5411e-05	1.1426	0.00801388	0.00100524	0.00867995	0.000379877	0.923264
H/ACA ribonucleoprotein complex subunit 1 OS=Saccharomyces cerevisiae (strain ATCC 204508 / S288c) GN=GAR1 PE=1 SV=1	GAR1 YHR089C	P28007	11.46	205	21480.3	0	0	Nucleus â€º nucleolus.	box H/ACA snoRNA binding; box H/ACA snoRNP complex; pseudouridine synthase activity; rRNA processing; snRNA pseudouridine synthesis	---	---	---	---	---	0.000309572	0.000105489	0.00022788	0.000208123	1.35849	0.000387978	0.000248503	0.000147692	0.000143485	2.62694	0.000187077	0.000186806	0	0	---	0	0	0	0	---	0.000242709	0.000210509	0	0	---
Glycerol-3-phosphate dehydrogenase [NAD(+)] 1 OS=Saccharomyces cerevisiae (strain ATCC 204508 / S288c) GN=GPD1 PE=1 SV=4	GPD1 DAR1 HOR1 OSG1 YDL022W D2830	Q00055	5.29	391	42737.6	1	0	Cytoplasm. Peroxisome.	NAD binding; NADH oxidation; carbohydrate metabolic process; cytosol; glycerol-3-phosphate catabolic process; glycerol-3-phosphate dehydrogenase [NAD+] activity; glycerol-3-phosphate dehydrogenase complex; intracellular accumulation of glycerol; nucleus; peroxisome	---	---	---	---	---	0.000293566	0.000172039	9.63757e-05	0.000166928	3.04606	0.000356063	0.000150678	0.000157181	0.00013652	2.2653	7.24863e-05	0.00012555	0	0	---	0	0	0	0	---	3.28214e-05	5.68483e-05	0	0	---
ATP-dependent RNA helicase DOB1 OS=Saccharomyces cerevisiae (strain ATCC 204508 / S288c) GN=MTR4 PE=1 SV=1	MTR4 DOB1 YJL050W J1158	P47047	5.96	1073	122055	3	0	Nucleus.	ATP binding; ATP-dependent 3'-5' RNA helicase activity; TRAMP complex; U4 snRNA 3'-end processing; U5 snRNA 3'-end processing; exonucleolytic trimming to generate mature 3'-end of 5.8S rRNA from tricistronic rRNA transcript (SSU-rRNA, 5.8S rRNA, LSU-rRNA); ncRNA polyadenylation; nuclear polyadenylation-dependent mRNA catabolic process; nuclear polyadenylation-dependent rRNA catabolic process; nuc…	---	---	---	---	---	---	---	---	---	---	3.19145e-05	5.52775e-05	0	0	---	---	---	---	---	---	---	---	---	---	---	---	---	---	---	---
40S ribosomal protein S21-B OS=Saccharomyces cerevisiae (strain ATCC 204508 / S288c) GN=RPS21B PE=1 SV=1	RPS21B RPS25B RPS26B YJL136C J0664	Q3E754	5.75	87	9759.87	0	0	Cytoplasm.	cytoplasmic translation; cytosolic small ribosomal subunit; endonucleolytic cleavage in ITS1 to separate SSU-rRNA from 5.8S rRNA and LSU-rRNA from tricistronic rRNA transcript (SSU-rRNA, 5.8S rRNA, LSU-rRNA); endonucleolytic cleavage to generate mature 3'-end of SSU-rRNA from (SSU-rRNA, 5.8S rRNA, LSU-rRNA); structural constituent of ribosome; translational elongation	0.0075007	0.00156896	0.0413701	0.0160251	0.181307	0.0217804	0.00271365	0.0205963	0.00299516	1.05749	0.0105387	0.00232734	0.018553	0.00120083	0.568033	0.0249048	0.00175805	0.0493622	0.00274495	0.504532	0.0301892	0.00226469	0.0417391	0.0024309	0.723284	0.0285573	0.00180427	0.0414869	0.00441415	0.688346
Tubulin-specific chaperone A OS=Saccharomyces cerevisiae (strain ATCC 204508 / S288c) GN=RBL2 PE=1 SV=1	RBL2 YOR265W	P48606	4.99	106	12379	0	0	Cytoplasm â€º cytoskeleton.	beta-tubulin binding; cytoplasm; microtubule; tubulin complex assembly	0	0	0.0039389	0.00140498	0	0.000119462	0.000206914	0.00259061	0.000497726	0.0461136	0.000107686	0.000186518	0.00233988	0.000302019	0.046022	0	0	0.00401297	0.000796537	0	0.000328172	0.00056841	0.00500722	0.000554679	0.0655398	0.000121068	0.000209695	0.00468619	0.000384814	0.025835
Heat shock protein SSC3, mitochondrial OS=Saccharomyces cerevisiae (strain ATCC 204508 / S288c) GN=ECM10 PE=1 SV=1	ECM10 SSC3 YEL030W	P39987	UNDEFINED	644	0	0	0	Mitochondrion matrix â€º mitochondrion nucleoid.	ATP binding; mitochondrial nucleoid; protein refolding; protein targeting to mitochondrion	---	---	---	---	---	---	---	---	---	---	0.000902342	0.000557774	0.000532708	0.000118764	1.69388	0.000207293	7.75532e-05	0.000230384	7.41287e-05	0.899771	0.00018441	7.96807e-05	0.000170893	7.0014e-06	1.0791	0.00015385	0.0001335	0.000364762	9.48891e-05	0.421783
Adenylyl cyclase-associated protein OS=Saccharomyces cerevisiae (strain ATCC 204508 / S288c) GN=SRV2 PE=1 SV=1	SRV2 CAP1 YNL138W N1210 N1838	P17555	5.48	526	57521.5	0	0	Cytoplasm â€º cytoskeleton â€º actin patch.	Ras protein signal transduction; actin cortical patch; adenylate cyclase binding; cell morphogenesis; cytoskeletal protein binding; cytoskeleton organization; mating projection tip	---	---	---	---	---	0.00019351	4.26157e-05	0.000143245	8.07001e-05	1.3509	5.87401e-05	0.000101741	4.06658e-05	7.04352e-05	1.44446	0.000124014	0.000150336	0.000263875	6.1424e-05	0.469972	0.000181031	0.000156934	0.000281151	9.2458e-05	0.643891	0.000205675	0.000247855	0.000304006	8.69164e-05	0.676549
Ornithine aminotransferase OS=Saccharomyces cerevisiae (strain ATCC 204508 / S288c) GN=CAR2 PE=1 SV=2	CAR2 CARGB YLR438W L9753.2	P07991	6.46	424	46086	2	Amino-acid biosynthesis; L-proline biosynthesis; L-glutamate 5-semialdehyde from L-ornithine: step 1/1.	Cytoplasm.	L-proline biosynthetic process; arginine catabolic process; cytosol; nucleus; ornithine metabolic process; ornithine-oxo-acid transaminase activity; pyridoxal phosphate binding	0.000432435	0.000101466	0	0	---	0.000449815	8.94523e-05	6.92707e-05	0.00011998	6.49359	0.000584726	0.00015808	2.52243e-05	4.36897e-05	23.1811	0.000465776	0.000147884	0	0	---	0.000225084	4.55794e-05	0	0	---	0.000672293	0.000282779	0	0	---
Proteasome subunit alpha type-6 OS=Saccharomyces cerevisiae (strain ATCC 204508 / S288c) GN=PRE5 PE=1 SV=1	PRE5 YMR314W YM9924.06	P40302	6.9	234	25604	3	0	Cytoplasm. Nucleus.	nuclear outer membrane-endoplasmic reticulum membrane network; nucleus; proteasomal ubiquitin-dependent protein catabolic process; proteasomal ubiquitin-independent protein catabolic process; proteasome core complex, alpha-subunit complex; proteasome storage granule; threonine-type endopeptidase activity	---	---	---	---	---	0.000760978	9.68109e-05	0.00016309	0.000141385	4.66599	0.000483095	0.000323832	0.000264481	0.000134584	1.82658	0.00024224	0.000419573	4.08954e-05	7.08329e-05	5.92341	0	0	0	0	---	0.000211708	0.000183705	0	0	---
60S ribosomal protein L8-A OS=Saccharomyces cerevisiae (strain ATCC 204508 / S288c) GN=RPL8A PE=1 SV=4	RPL8A MAK7 RPL4A YHL033C	P17076	10.04	256	27993.5	0	0	Cytoplasm.	cytoplasmic translation; cytosolic large ribosomal subunit; ribosome biogenesis; structural constituent of ribosome	0.00030065	0.000260391	0	0	---	0.0041703	0.000420951	0.00437201	0.000690771	0.953861	0.00616587	0.00184115	0.00349501	0.000451657	1.76419	0.00154794	0.000232921	0	0	---	0.000656047	0.000175713	3.53939e-05	6.13041e-05	18.5356	0.000471464	0.000286116	7.18919e-05	0.00012452	6.55796
DNA-directed RNA polymerase II subunit RPB1 OS=Saccharomyces cerevisiae (strain ATCC 204508 / S288c) GN=RPO21 PE=1 SV=2	RPO21 RPB1 RPB220 SUA8 YDL140C D2150	P04050	5.42	1733	191612	2	0	Nucleus.	DNA binding; DNA-directed RNA polymerase II, core complex; DNA-directed RNA polymerase activity; metal ion binding; mitochondrion; transcription from RNA polymerase II promoter	---	---	---	---	---	7.30114e-06	1.26459e-05	1.62336e-05	1.63088e-05	0.449756	1.97601e-05	3.42255e-05	0	0	---	---	---	---	---	---	---	---	---	---	---	---	---	---	---	---
Nucleolar protein 12 OS=Saccharomyces cerevisiae (strain ATCC 204508 / S288c) GN=NOP12 PE=1 SV=1	NOP12 YOL041C	Q08208	9.45	459	51941.9	0	0	Nucleus â€º nucleolus.	RNA binding; maturation of LSU-rRNA from tricistronic rRNA transcript (SSU-rRNA, 5.8S rRNA, LSU-rRNA); nucleolus; nucleotide binding; preribosome	---	---	---	---	---	0.000166193	8.26761e-05	0	0	---	2.48687e-05	4.30739e-05	6.59627e-05	6.40836e-05	0.377012	---	---	---	---	---	---	---	---	---	---	---	---	---	---	---
Protein FMP16, mitochondrial OS=Saccharomyces cerevisiae (strain ATCC 204508 / S288c) GN=FMP16 PE=1 SV=1	FMP16 YDR070C	Q12497	6.06	93	7869.64	0	0	Mitochondrion.	mitochondrion	0	0	0.00067812	0.000455164	0	0	0	0.000509072	0.000348764	0	0	0	0.00122103	0.00018383	0	0.00099284	0.000219399	0.00278701	0.000977	0.356239	0.00103136	0.000456726	0.00208443	0.000606273	0.494793	0.00104841	0.00042668	0.00191917	0.000377212	0.546285
ATP synthase subunit H, mitochondrial OS=Saccharomyces cerevisiae (strain ATCC 204508 / S288c) GN=ATP14 PE=1 SV=1	ATP14 YLR295C L8003.20	Q12349	4.24	124	10407.4	0	0	Mitochondrion. Mitochondrion inner membrane.	ATP catabolic process; ATP synthesis coupled proton transport; cristae formation; integral to membrane; mitochondrial proton-transporting ATP synthase complex assembly; mitochondrial proton-transporting ATP synthase complex, coupling factor F(o)	0	0	0.00160459	0.000315284	0	0	0	0.0024535	0.00018472	0	0	0	0.00207316	0.000280272	0	0.000619457	0.000620356	0.00335416	0.000679476	0.184683	0.000770721	0.000162943	0.00353793	0.000937563	0.217846	0.000194266	0.000336479	0.00400306	0.000274942	0.0485295
Plasma membrane ATPase 1 OS=Saccharomyces cerevisiae (strain ATCC 204508 / S288c) GN=PMA1 PE=1 SV=2	PMA1 YGL008C	P05030	4.96	918	99619.4	3	0	Cell membrane; Multi-pass membrane protein.	ATP binding; ATP biosynthetic process; hydrogen-exporting ATPase activity, phosphorylative mechanism; integral to membrane; membrane raft; metal ion binding; mitochondrion; plasma membrane; regulation of pH	0.000429558	0.000129806	6.80207e-05	3.27559e-05	6.3151	0.000332463	0.000124256	0	0	---	0.000997712	0.000525631	1.06655e-05	1.84731e-05	93.5461	5.73344e-05	6.35673e-05	5.09596e-05	3.71176e-05	1.1251	5.15726e-05	4.46908e-05	0	0	---	7.92292e-05	3.75467e-05	3.12139e-05	5.4064e-05	2.53827
DNA-directed RNA polymerase III subunit RPC1 OS=Saccharomyces cerevisiae (strain ATCC 204508 / S288c) GN=RPO31 PE=1 SV=1	RPO31 RPC1 RPC160 YOR116C O3254 YOR3254C	P04051	8.5	1460	162301	2	0	Nucleus.	DNA binding; DNA-directed RNA polymerase III complex; DNA-directed RNA polymerase activity; ribonucleoside binding; tRNA transcription from RNA polymerase III promoter; zinc ion binding	---	---	---	---	---	---	---	---	---	---	2.72841e-05	4.72575e-05	1.39234e-05	1.20823e-05	1.95959	8.74318e-06	1.51436e-05	0	0	---	7.94206e-06	1.3756e-05	0	0	---	8.17584e-06	1.4161e-05	3.16313e-05	3.93056e-05	0.258473
Imidazoleglycerol-phosphate dehydratase OS=Saccharomyces cerevisiae (strain ATCC 204508 / S288c) GN=HIS3 PE=1 SV=2	HIS3 YOR202W	P06633	5.93	220	23833.2	4	Amino-acid biosynthesis; L-histidine biosynthesis; L-histidine from 5-phospho-alpha-D-ribose 1-diphosphate: step 6/9.	0	histidine biosynthetic process; imidazoleglycerol-phosphate dehydratase activity	5.78895e-05	0.000100268	0.000403218	0.000243017	0.143569	0.000461811	0.000197766	0.000389256	0.000130593	1.1864	0.000197399	0.000171628	0.000515444	7.04817e-05	0.382968	0.000174827	0.000302809	4.0822e-05	7.07058e-05	4.28267	0.000328386	0.000168006	0	0	---	0.000389424	9.0297e-05	4.1828e-05	7.24483e-05	9.31013
Imidazole glycerol phosphate synthase hisHF OS=Saccharomyces cerevisiae (strain ATCC 204508 / S288c) GN=HIS7 PE=1 SV=2	HIS7 YBR248C YBR1640	P33734	5.33	552	61068.1	2	Amino-acid biosynthesis; L-histidine biosynthesis; L-histidine from 5-phospho-alpha-D-ribose 1-diphosphate: step 5/9.	0	cytoplasm; glutamine metabolic process; histidine biosynthetic process; imidazoleglycerol-phosphate synthase activity; intracellular; oxo-acid-lyase activity; response to stress	9.58636e-05	8.31934e-05	0	0	---	9.23677e-05	7.9998e-05	0.000119432	5.73613e-05	0.773393	2.06789e-05	3.58169e-05	0.000131492	3.52541e-05	0.157263	---	---	---	---	---	---	---	---	---	---	---	---	---	---	---
Acetyl-coenzyme A synthetase 2 OS=Saccharomyces cerevisiae (strain ATCC 204508 / S288c) GN=ACS2 PE=1 SV=1	ACS2 YLR153C L9634.10	P52910	6.21	683	75491.6	6	Carbohydrate metabolism; pyruvate metabolism.	Cytoplasm. Nucleus.	AMP binding; ATP binding; acetate-CoA ligase activity; acetyl-CoA biosynthetic process; acetyl-CoA biosynthetic process from acetate; acid-ammonia (or amide) ligase activity; cytosol; histone acetylation; nucleolus; pyruvate metabolic process; replicative cell aging	---	---	---	---	---	0.000130228	3.16195e-05	0	0	---	0.00016605	4.38925e-05	0	0	---	---	---	---	---	---	---	---	---	---	---	---	---	---	---	---
Serine/threonine-protein kinase AKL1 OS=Saccharomyces cerevisiae (strain ATCC 204508 / S288c) GN=AKL1 PE=1 SV=1	AKL1 YBR059C YBR0519	P38080	7.38	1108	123989	2	0	0	ATP binding; actin cytoskeleton organization; cellular bud neck; cytoplasm; protein kinase activity; protein serine/threonine kinase activity; regulation of endocytosis	0	0	3.26515e-05	1.47605e-05	0	---	---	---	---	---	0.000100797	0.000100293	2.79993e-05	1.30767e-06	3.59997	5.77545e-05	5.29923e-05	0	0	---	0.000214803	6.12144e-05	0	0	---	0.000153739	4.55593e-05	0	0	---
High mobility group protein 1 OS=Saccharomyces cerevisiae (strain ATCC 204508 / S288c) GN=HMO1 PE=1 SV=1	HMO1 HSM2 YDR174W YD9395.07	Q03973	8.43	246	27544	0	0	Nucleus â€º nucleolus.	DNA binding, bending; cytosol; double-stranded DNA binding; four-way junction DNA binding; nucleolus; regulation of ribosomal protein gene transcription from RNA polymerase II promoter; regulation of transcription by chromatin organization; regulation of transcription from RNA polymerase I promoter; transcription, DNA-dependent	0.000314639	0.000408699	3.47465e-05	6.01827e-05	9.05526	0.000104313	0.000180675	0.000155661	7.19935e-05	0.670131	0	0	0.000334214	0.000192913	0	5.18904e-05	8.98768e-05	0.000376446	0.000136811	0.137843	0.000242632	8.29227e-05	0.000264823	0.00018355	0.916205	0.000244369	0.000305976	0.000227222	0.000228624	1.07546
2-oxoglutarate dehydrogenase, mitochondrial OS=Saccharomyces cerevisiae (strain ATCC 204508 / S288c) GN=KGD1 PE=1 SV=2	KGD1 OGD1 YIL125W	P20967	6.36	1014	111058	1	0	Mitochondrion matrix. Mitochondrion matrix â€º mitochondrion nucleoid.	2-oxoglutarate metabolic process; mitochondrial nucleoid; mitochondrial oxoglutarate dehydrogenase complex; oxoglutarate dehydrogenase (succinyl-transferring) activity; thiamine pyrophosphate binding; tricarboxylic acid cycle	---	---	---	---	---	6.24009e-05	7.79214e-05	0	0	---	6.53424e-05	6.76503e-05	0	0	---	---	---	---	---	---	---	---	---	---	---	---	---	---	---	---
Translation machinery-associated protein 17 OS=Saccharomyces cerevisiae (strain ATCC 204508 / S288c) GN=TMA17 PE=1 SV=1	TMA17 YDL110C D2320	Q12513	4.58	150	16771.5	0	0	Cytoplasm. Nucleus.	cytoplasm; nucleus	9.14844e-05	0.000158456	0.00798625	0.00456437	0.0114552	8.55367e-05	0.000148154	0.0018424	0.000470811	0.0464268	0	0	0.00151302	4.76488e-05	0	0.00250948	0.00124964	0.00588124	0.000556289	0.426693	0.00294786	6.01566e-05	0.00673955	0.00081038	0.437397	0.00300226	0.000828411	0.00825867	0.000829688	0.363529
General transcriptional corepressor TUP1 OS=Saccharomyces cerevisiae (strain ATCC 204508 / S288c) GN=TUP1 PE=1 SV=2	TUP1 AAR1 AER2 AMM1 CYC9 FLK1 SFL2 UMR7 YCR084C YCR84C	P16649	5.43	713	78307.7	0	0	Nucleus.	RNA polymerase II transcription factor binding transcription factor activity involved in negative regulation of transcription; histone binding; histone deacetylase binding; histone exchange; mediator complex binding; negative regulation of dipeptide transport by negative regulation of transcription from RNA polymerase II promoter; negative regulation of mating-type specific transcription from RNA…	3.59825e-05	3.11641e-05	3.59648e-05	6.22929e-05	1.00049	7.14963e-05	3.15876e-05	6.64008e-05	4.54909e-05	1.07674	0	0	4.22426e-05	4.12358e-05	0	0	0	0.000140671	7.6465e-05	0	0.000182152	0.000147366	0.000257413	2.70358e-05	0.707626	0.000273801	5.00879e-05	0.000211128	6.43639e-05	1.29685
U3 small nucleolar RNA-associated protein 10 OS=Saccharomyces cerevisiae (strain ATCC 204508 / S288c) GN=UTP10 PE=1 SV=1	UTP10 YJL109C J0808	P42945	6.11	1769	200082	0	0	Nucleus â€º nucleolus. Mitochondrion.	endonucleolytic cleavage in 5'-ETS of tricistronic rRNA transcript (SSU-rRNA, 5.8S rRNA, LSU-rRNA); endonucleolytic cleavage in ITS1 to separate SSU-rRNA from 5.8S rRNA and LSU-rRNA from tricistronic rRNA transcript (SSU-rRNA, 5.8S rRNA, LSU-rRNA); endonucleolytic cleavage to generate mature 5'-end of SSU-rRNA from (SSU-rRNA, 5.8S rRNA, LSU-rRNA); integral to membrane; mitochondrion; positive reg…	1.43988e-05	2.49394e-05	0	0	---	---	---	---	---	---	1.1644e-05	2.0168e-05	0	0	---	---	---	---	---	---	---	---	---	---	---	---	---	---	---	---
Cytochrome b-c1 complex subunit 2, mitochondrial OS=Saccharomyces cerevisiae (strain ATCC 204508 / S288c) GN=QCR2 PE=1 SV=1	QCR2 COR2 UCR2 YPR191W P9677.6	P07257	6.08	368	38705.1	0	0	Mitochondrion inner membrane.	aerobic respiration; integral to membrane; metal ion binding; metalloendopeptidase activity; mitochondrial crista; mitochondrial electron transport, ubiquinol to cytochrome c; mitochondrial respiratory chain complex III; proteolysis	---	---	---	---	---	0.000138014	0.000157406	2.52481e-05	4.3731e-05	5.4663	0.000254243	6.93453e-05	5.52394e-05	4.79354e-05	4.60257	0.00020873	0.000209033	0.000350467	0.000225715	0.595577	0.000323662	0.000108177	0.000625085	0.000170694	0.517788	0.000195499	0.000169313	0.000738377	0.000112497	0.264769
Protein transport protein SEC9 OS=Saccharomyces cerevisiae (strain ATCC 204508 / S288c) GN=SEC9 PE=1 SV=1	SEC9 HSS7 YGR009C	P40357	5.03	651	73623.8	0	0	0	Golgi to plasma membrane transport; SNAP receptor activity; SNARE complex; exocytosis; extrinsic to plasma membrane; protein transport; vesicle fusion	1.95633e-05	3.38846e-05	0.000164807	3.44483e-05	0.118704	---	---	---	---	---	2.03967e-05	3.53282e-05	3.23724e-05	5.60707e-05	0.630065	0.000236069	0.000270829	0.000182734	5.94751e-05	1.29187	0.000369165	0.000123453	0.000114802	9.40819e-05	3.21566	0.000447559	0.000214848	0.000101345	5.10574e-05	4.41618
60S ribosomal protein L37-B OS=Saccharomyces cerevisiae (strain ATCC 204508 / S288c) GN=RPL37B PE=1 SV=2	RPL37B RPL35B YDR500C D9719.6	P51402	11.79	88	9868.29	0	0	Cytoplasm.	cytoplasmic translation; cytosolic large ribosomal subunit; metal ion binding; rRNA binding; structural constituent of ribosome	---	---	---	---	---	0.0010168	0.00110155	0.00140114	0.000160135	0.725695	0.00256487	0.000688567	0.00185519	0.000705941	1.38254	0.00166017	0.00111226	0	0	---	0.00053253	0.00060211	0	0	---	0.000689635	0.000460201	0.000108539	0.000187995	6.35379
Binder of USO1 and GRH1 protein 1 OS=Saccharomyces cerevisiae (strain ATCC 204508 / S288c) GN=BUG1 PE=1 SV=1	BUG1 YDL099W	Q12191	4.54	341	38294.5	0	0	Cytoplasm.	ER to Golgi vesicle-mediated transport; cis-Golgi network; cytoplasm; protein secretion	0	0	0.000580904	0.000329029	0	---	---	---	---	---	0	0	0.000213318	6.00784e-05	0	0	0	0.000378969	5.55022e-05	0	0	0	0.000214514	9.05895e-05	0	3.76339e-05	6.51838e-05	0.000384928	4.83185e-05	0.0977688
Eukaryotic translation initiation factor 3 subunit G OS=Saccharomyces cerevisiae (strain ATCC 204508 / S288c) GN=TIF35 PE=1 SV=1	TIF35 YDR429C D9461.16	Q04067	6.41	274	30501.5	0	0	Cytoplasm.	eukaryotic 43S preinitiation complex; eukaryotic 48S preinitiation complex; eukaryotic translation initiation factor 3 complex; formation of translation preinitiation complex; nucleotide binding; regulation of translational initiation; translation initiation factor activity; translation reinitiation	---	---	---	---	---	0.000556881	4.3692e-06	3.39099e-05	5.87337e-05	16.4224	0.000255417	3.29594e-05	3.8457e-05	6.66095e-05	6.64162	0.000331449	0.000318235	9.95421e-05	0.000172412	3.32973	0.000697587	0.000147481	0	0	---	0.000394049	0.000348024	0	0	---
Cytochrome c peroxidase, mitochondrial OS=Saccharomyces cerevisiae (strain ATCC 204508 / S288c) GN=CCP1 PE=1 SV=2	CCP1 CCP CPO YKR066C	P00431	5.03	361	33532.3	1	0	Mitochondrion matrix.	cellular response to oxidative stress; cytochrome-c peroxidase activity; heme binding; hydrogen peroxide catabolic process; metal ion binding; mitochondrial intermembrane space; mitochondrial matrix	3.80129e-05	6.58403e-05	9.47107e-05	0.000164044	0.401358	0	0	0.000130071	0.000160085	0	0	0	0.000147257	0.000135487	0	0.000188794	0.000177896	0.000484299	3.51074e-05	0.389828	6.69054e-05	0.000115883	0.000297357	0.000266745	0.225	3.55489e-05	6.15725e-05	0.000152945	0.000264908	0.23243
Glutamine synthetase OS=Saccharomyces cerevisiae (strain ATCC 204508 / S288c) GN=GLN1 PE=1 SV=4	GLN1 YPR035W YP3085.01 YP9367.15	P32288	5.92	370	41634.8	6	0	Cytoplasm.	ATP binding; cytoplasm; glutamate-ammonia ligase activity; glutamine biosynthetic process; nucleus	---	---	---	---	---	0.000411433	0.000203743	0.000181875	0.000123689	2.26217	0.000349101	0.000308402	0.000109882	9.53526e-05	3.17706	---	---	---	---	---	---	---	---	---	---	---	---	---	---	---
NADPH-dependent aldose reductase GRE3 OS=Saccharomyces cerevisiae (strain ATCC 204508 / S288c) GN=GRE3 PE=1 SV=1	GRE3 YHR104W	P38715	6.6	327	37118.8	1	0	Cytoplasm. Nucleus.	D-xylose catabolic process; D-xylose:NADP reductase activity; arabinose catabolic process; cellular response to oxidative stress; cytoplasm; galactose catabolic process; glucose 1-dehydrogenase (NADP+) activity; mRNA binding; nucleus	0.000926325	0.000211066	0	0	---	0.000155862	0.00013499	0.000202344	0.000128779	0.770281	0.00031533	9.18694e-05	0	0	---	8.66732e-05	0.000150122	0	0	---	0.000107851	0.00010641	5.5418e-05	9.59869e-05	1.94613	0.000156981	0.000271898	0	0	---
60S ribosomal protein L7-A OS=Saccharomyces cerevisiae (strain ATCC 204508 / S288c) GN=RPL7A PE=1 SV=3	RPL7A RPL6A RPL8A YL8A YGL076C	P05737	10.15	244	27507	0	0	Cytoplasm.	cytoplasmic translation; cytosolic large ribosomal subunit; structural constituent of ribosome	0.000643008	0.000269164	0	0	---	0.00318144	0.000529194	0.00365314	0.000318573	0.870878	0.00443854	0.000735127	0.00264297	0.000734611	1.67937	0.000616266	0.000522539	3.72603e-05	6.45367e-05	16.5395	0.000296634	0.000153904	0.000152875	0.000132553	1.94037	0.000400041	7.31817e-05	0.000194264	0.000178925	2.05926
Regulator of Ty1 transposition protein 102 OS=Saccharomyces cerevisiae (strain ATCC 204508 / S288c) GN=RTT102 PE=1 SV=2	RTT102 YGR275W G9378	P53330	5.52	157	17794.6	0	0	Nucleus.	RSC complex; SWI/SNF complex; chromatin remodeling; chromosome segregation; nucleosome disassembly; regulation of transcription, DNA-dependent; transcription elongation from RNA polymerase II promoter	0	0	0.000860131	3.80932e-05	0	0.000488075	0.000490353	0.00054463	1.48426e-05	0.896159	0.000580155	0.00082322	0.000327078	0.000107226	1.77375	0.00261394	0.000151485	0.000699797	0.00028599	3.73528	0.0033535	0.000304586	0.0004634	0.000185635	7.23674	0.00303188	0.000511815	0.000416914	9.58418e-05	7.2722
GrpE protein homolog, mitochondrial OS=Saccharomyces cerevisiae (strain ATCC 204508 / S288c) GN=MGE1 PE=1 SV=1	MGE1 GRPE GRPE1 YGE1 YOR232W O5099	P38523	UNDEFINED	228	0	0	0	Mitochondrion matrix.	adenyl-nucleotide exchange factor activity; mitochondrial matrix; presequence translocase-associated import motor; protein import into mitochondrial matrix; protein refolding	0	0	0.00159044	0.000870402	0	0.000168088	0.000168827	0.000123389	0.000123961	1.36225	0.00010341	9.16749e-05	0.000591868	0.00022423	0.174717	6.21538e-05	0.000107654	0.000408748	0.000262741	0.152059	0.000624116	0.00029722	0.000353914	0.000400486	1.76347	0.000428114	7.83173e-05	0.00053456	7.16825e-05	0.800872
Nucleolar protein 56 OS=Saccharomyces cerevisiae (strain ATCC 204508 / S288c) GN=NOP56 PE=1 SV=1	NOP56 SIK1 YLR197W L8167.9	Q12460	8.95	504	56864.1	0	0	Nucleus â€º nucleolus.	90S preribosome; box C/D snoRNP complex; rRNA modification; small-subunit processome	0.000176885	0.000306373	5.21132e-05	5.09237e-05	3.39424	0.000126249	4.40714e-05	9.34225e-05	6.27911e-05	1.35138	8.83796e-05	0.00010458	0	0	---	7.60927e-05	7.59826e-05	0.000128897	6.54717e-05	0.590338	7.21487e-05	7.18849e-05	0.00027007	9.90249e-05	0.267148	2.3684e-05	4.10219e-05	0.000204276	2.92686e-05	0.115941
Pyruvate decarboxylase isozyme 2 OS=Saccharomyces cerevisiae (strain ATCC 204508 / S288c) GN=PDC5 PE=1 SV=4	PDC5 YLR134W L3133 L9606.7	P16467	5.99	563	61912.1	4	Fermentation; ethanol fermentation. Amino-acid degradation; Ehrlich pathway.	Cytoplasm. Nucleus.	L-phenylalanine catabolic process; aromatic amino acid family catabolic process to alcohol via Ehrlich pathway; branched-chain amino acid catabolic process; cytoplasm; glucose catabolic process to ethanol; magnesium ion binding; nucleus; pyruvate decarboxylase activity; pyruvate metabolic process; thiamine pyrophosphate binding; tryptophan catabolic process	0.00203493	0.000470559	0	0	---	0.00162394	0.000433639	0.00438416	0.000105174	0.370411	0.00178854	7.59434e-05	0.00338681	0.000319555	0.528091	0.000628052	0.000576338	0.000177632	0.000307667	3.53569	0.000720335	0.00011774	0.000160939	0.000278754	4.47583	0.000420353	0.000383834	0.00013167	0.000123592	3.19248
Alpha-agglutinin OS=Saccharomyces cerevisiae (strain ATCC 204508 / S288c) GN=SAG1 PE=1 SV=2	SAG1 AGAL1 YJR004C J1418	P20840	4.34	650	65596.7	0	0	Secreted â€º cell wall. Membrane; Lipid-anchor â€º GPI-anchor.	agglutination involved in conjugation with cellular fusion; anchored to membrane; cell adhesion molecule binding; extracellular region; fungal-type cell wall	---	---	---	---	---	5.86712e-05	5.83998e-05	0.000366058	5.75656e-05	0.160278	1.75611e-05	3.04168e-05	0.000287516	5.77336e-05	0.0610788	---	---	---	---	---	---	---	---	---	---	---	---	---	---	---
Eukaryotic translation initiation factor 2 subunit gamma OS=Saccharomyces cerevisiae (strain ATCC 204508 / S288c) GN=GCD11 PE=1 SV=1	GCD11 TIF213 YER025W	P32481	6.37	527	57865.8	0	0	0	GTP binding; GTP catabolic process; GTPase activity; eukaryotic translation initiation factor 2 complex; multi-eIF complex; positive regulation of translational fidelity; translation initiation factor activity	---	---	---	---	---	4.83747e-05	4.18965e-05	0.000159412	0.00015868	0.303458	2.16599e-05	3.7516e-05	0.000134598	8.20143e-05	0.160923	2.42221e-05	4.19539e-05	0.000191647	2.44722e-05	0.126389	0	0	0.00019164	3.30107e-05	0	2.43513e-05	4.21778e-05	0.000160452	5.54617e-05	0.151767
Cytochrome c iso-1 OS=Saccharomyces cerevisiae (strain ATCC 204508 / S288c) GN=CYC1 PE=1 SV=2	CYC1 YJR048W J1653	P00044	9.47	109	12050.8	0	0	Mitochondrion intermembrane space.	electron carrier activity; heme binding; iron ion binding; mitochondrial electron transport, cytochrome c to oxygen; mitochondrial electron transport, ubiquinol to cytochrome c; mitochondrial intermembrane space; respiratory chain	0.0113507	0.00163748	0.00149018	0.00068091	7.617	0.00303208	0.000392921	0.000615	0.000554792	4.93022	0.00166544	0.000552248	0.000868992	0.000519271	1.91651	0.00954979	0.000853363	0.00143715	0.00038517	6.64496	0.00934118	0.00215214	0.00285612	0.000341155	3.27058	0.00908002	0.00114051	0.00274928	0.00025232	3.3027
Protoplast secreted protein 2 OS=Saccharomyces cerevisiae (strain ATCC 204508 / S288c) GN=PST2 PE=1 SV=1	PST2 YDR032C D3422 YD9673.02C	Q12335	5.3	198	18723	0	0	Secreted.	FMN binding; extracellular region; mitochondrion; negative regulation of transcription, DNA-dependent; oxidation-reduction process; oxidoreductase activity; plasma membrane	0.00106649	0.000610524	8.63398e-05	0.000149545	12.3523	0.000449322	0.000292604	9.63715e-05	8.35458e-05	4.6624	0.00093002	0.000210777	0.000264714	0.000191844	3.5133	0.0040803	0.000205249	0.00270251	0.000459622	1.50982	0.00405098	0.000313963	0.00222701	0.000229404	1.81902	0.00351513	0.000543805	0.00226941	0.000543638	1.54892
High-affinity potassium transport protein OS=Saccharomyces cerevisiae (strain ATCC 204508 / S288c) GN=TRK1 PE=1 SV=1	TRK1 YJL129C J0693	P12685	8.64	1235	141073	0	0	Membrane; Multi-pass membrane protein.	cellular potassium ion homeostasis; integral to membrane; membrane raft; plasma membrane; potassium ion transmembrane transporter activity	---	---	---	---	---	---	---	---	---	---	1.75821e-05	1.52867e-05	2.57243e-05	2.55975e-05	0.68348	---	---	---	---	---	---	---	---	---	---	---	---	---	---	---
Protease A inhibitor 3 OS=Saccharomyces cerevisiae (strain ATCC 204508 / S288c) GN=PAI3 PE=1 SV=1	PAI3 YMR174C YM8010.04C	P01094	6.72	68	7707.45	0	0	0	aspartic-type endopeptidase inhibitor activity; cytoplasm; endopeptidase inhibitor activity; vacuolar protein catabolic process	0	0	0.000929206	0.000248506	0	0.000938344	0.000658016	0	0	---	0.000541995	0.0005907	0.00106741	0.00028618	0.507768	0	0	0.00214888	0.000785827	0	0.00105535	2.85267e-05	0.00148521	0.000255833	0.710574	0.000541388	2.15918e-05	0.00151656	0.000477762	0.356984
ATPase inhibitor, mitochondrial OS=Saccharomyces cerevisiae (strain ATCC 204508 / S288c) GN=INH1 PE=1 SV=2	INH1 YDL181W D1305	P01097	9.15	85	7383.2	0	0	Mitochondrion.	enzyme inhibitor activity; mitochondrion; negative regulation of ATPase activity; negative regulation of nucleotide metabolic process	0	0	0.00393685	0.000807979	0	0.00254383	0.000269889	0.00010931	0.00018933	23.2718	0.00260432	0.000366643	0.000123967	0.000214718	21.0081	0.0142779	0.00341107	0.00520187	0.00033673	2.74477	0.0123914	0.000810578	0.00599922	0.00138742	2.0655	0.0112516	0.00026928	0.00551095	0.000294567	2.04168
Glucan 1,3-beta-glucosidase I/II OS=Saccharomyces cerevisiae (strain ATCC 204508 / S288c) GN=EXG1 PE=1 SV=1	EXG1 BGL1 SCW6 YLR300W L8003.3	P23776	4.45	448	46904.8	3	0	Secreted â€º cell wall. Secreted.	cellular glucan metabolic process; extracellular region; fungal-type cell wall; fungal-type cell wall organization; glucan exo-1,3-beta-glucosidase activity	0.00173558	0.000543591	0	0	---	0	0	0.000337443	0.000138917	0	0	0	0.000324387	5.38715e-05	0	0.000155145	0.000199052	0	0	---	0	0	0	0	---	0.000171873	0.000297692	0	0	---
Probable 1,3-beta-glucanosyltransferase GAS3 OS=Saccharomyces cerevisiae (strain ATCC 204508 / S288c) GN=GAS3 PE=1 SV=1	GAS3 YMR215W YM8261.09	Q03655	4.56	524	52062.9	2	0	Secreted â€º cell wall. Membrane; Lipid-anchor â€º GPI-anchor.	1,3-beta-glucanosyltransferase activity; anchored to membrane; carbohydrate metabolic process; extracellular region; fungal-type cell wall; integral to membrane; plasma membrane	0.000275111	0.000152851	0.000546398	0.000108712	0.503499	2.44857e-05	4.24105e-05	0.000215917	8.99257e-05	0.113403	2.53402e-05	4.38905e-05	0.000140847	0.000143179	0.179914	0.000100232	3.99658e-05	0.000277738	0.000153822	0.360888	0.000320256	4.74213e-05	0.000263923	6.33477e-05	1.21345	0.000233755	3.72411e-05	0.000339296	7.71913e-05	0.688941
Glutaredoxin-1 OS=Saccharomyces cerevisiae (strain ATCC 204508 / S288c) GN=GRX1 PE=1 SV=1	GRX1 YCL035C YCL35C	P25373	4.98	110	12380.2	0	0	Cytoplasm.	cell redox homeostasis; cellular response to oxidative stress; cytoplasm; disulfide oxidoreductase activity; electron carrier activity; electron transport chain; glutathione peroxidase activity; glutathione transferase activity; nucleus; protein disulfide oxidoreductase activity; protein glutathionylation	0.002969	0.000741573	0.00243502	0.000631006	1.21929	0.00104349	0.000611519	0.000256929	0.000445014	4.06141	0.00175529	0.00099069	0.000468265	0.000158582	3.74849	0.00342202	0.00170406	0.0011748	0.000172057	2.91284	0.0047888	0.000475957	0.00107627	0.00025293	4.44945	0.00443388	0.00125453	0.00161466	0.000359528	2.74601
Peptidyl-prolyl cis-trans isomerase CPR6 OS=Saccharomyces cerevisiae (strain ATCC 204508 / S288c) GN=CPR6 PE=1 SV=1	CPR6 YLR216C L8167.24	P53691	5.84	371	42071.9	5	0	Cytoplasm.	cytoplasm; peptidyl-prolyl cis-trans isomerase activity; protein refolding; unfolded protein binding	0.000217602	0.000222056	0	0	---	---	---	---	---	---	7.1581e-05	0.000123982	0.000334908	8.97956e-05	0.213733	0.000110801	0.000114779	0	0	---	9.63564e-05	9.76788e-05	0	0	---	0.000101356	0.000103857	0	0	---
E3 ubiquitin-protein ligase RSP5 OS=Saccharomyces cerevisiae (strain ATCC 204508 / S288c) GN=RSP5 PE=1 SV=1	RSP5 MDP1 NPI1 YER125W SYGP-ORF41	P39940	6.24	809	91816.2	6	Protein modification; protein ubiquitination.	Cytoplasm. Nucleus. Cytoplasm â€º cytoskeleton â€º actin patch.	Golgi apparatus; actin cortical patch; cellular bud tip; cellular response to UV; chromatin assembly or disassembly; endosome membrane; extrinsic to internal side of plasma membrane; late endosome to vacuole transport via multivesicular body sorting pathway; mitochondrion; mitochondrion organization; nucleus; phosphatidylinositol binding; positive regulation of fatty acid biosynthetic process; po…	1.69625e-05	2.93799e-05	6.57012e-05	5.70041e-05	0.258176	6.29997e-05	5.45633e-05	2.29699e-05	3.9785e-05	2.74271	7.83834e-05	0.000104449	1.32201e-05	2.2898e-05	5.92909	8.07694e-05	2.44393e-05	2.30668e-05	1.99961e-05	3.50154	0.000222098	9.1508e-05	1.12001e-05	1.93991e-05	19.8301	0.000120389	9.0988e-05	2.3172e-05	4.0135e-05	5.19545
H/ACA ribonucleoprotein complex subunit 2 OS=Saccharomyces cerevisiae (strain ATCC 204508 / S288c) GN=NHP2 PE=1 SV=2	NHP2 YDL208W D1045	P32495	9.73	156	17122	0	0	Nucleus â€º nucleolus.	box H/ACA snoRNP complex; cleavage involved in rRNA processing; rRNA pseudouridine synthesis; snRNA pseudouridine synthesis; snoRNA binding	0.00368499	0.00159135	0.00102526	0.000402067	3.5942	0.000815895	0.000285209	0.000305854	0.000110366	2.6676	0.000490745	0.000448074	0.000194083	0.000188554	2.52854	0.000427518	0.000159038	0.000118913	0.000103137	3.59523	0.000453001	0.000380147	0	0	---	0.000461869	0.000463257	0	0	---
Glutaredoxin-2, mitochondrial OS=Saccharomyces cerevisiae (strain ATCC 204508 / S288c) GN=GRX2 PE=1 SV=3	GRX2 TTR TTR1 YDR513W D9719.17	P17695	5.67	143	11833.6	0	0	Cytoplasm. Mitochondrion.	cell redox homeostasis; cellular response to oxidative stress; cytosol; disulfide oxidoreductase activity; electron carrier activity; electron transport chain; glutathione peroxidase activity; glutathione transferase activity; mitochondrion; protein disulfide oxidoreductase activity	9.03483e-05	0.000156488	0.00195534	0.000516857	0.0462059	0.000622068	0.000151516	0.000588388	0.000517803	1.05724	0.00098754	0.00131602	0.000515005	0.000351753	1.91753	0.00307982	0.0016578	0.001672	0.000188002	1.84199	0.00427335	0.000541375	0.00178992	0.000157631	2.38746	0.00340667	0.000858696	0.00157238	0.000514195	2.16657
26S proteasome complex subunit SEM1 OS=Saccharomyces cerevisiae (strain ATCC 204508 / S288c) GN=SEM1 PE=1 SV=1	SEM1 DSH1 YDR363W-A	O94742	4.16	89	10255	0	0	0	exocytosis; filamentous growth; mRNA export from nucleus; nucleus; proteasomal ubiquitin-dependent protein catabolic process; proteasome assembly; proteasome regulatory particle, lid subcomplex; proteasome storage granule; regulation of cell cycle; transcription, DNA-dependent	0	0	0.0033408	0.000661557	0	0	0	0.00245345	0.000355234	0	0	0	0.00209984	0.00042165	0	0.000144052	0.000249506	0.00767814	0.00120252	0.0187613	0.00148088	0.000481187	0.00770704	0.00127498	0.192147	0.000270663	0.000468803	0.00798845	0.00127459	0.0338818
Eukaryotic translation initiation factor 2 subunit alpha OS=Saccharomyces cerevisiae (strain ATCC 204508 / S288c) GN=SUI2 PE=1 SV=1	SUI2 TIF211 YJR007W J1429	P20459	4.93	304	34717.7	0	0	0	eukaryotic translation initiation factor 2 complex; multi-eIF complex; ribosome; translation initiation factor activity	---	---	---	---	---	0	0	9.29677e-05	0.000161025	0	0.000121236	0.00013213	0.000306669	0.000108086	0.39533	---	---	---	---	---	---	---	---	---	---	---	---	---	---	---
Regulator of ribosome biosynthesis OS=Saccharomyces cerevisiae (strain ATCC 204508 / S288c) GN=RRS1 PE=1 SV=1	RRS1 YOR294W	Q08746	9.46	203	22963.4	0	0	Nucleus.	endonucleolytic cleavage in ITS1 to separate SSU-rRNA from 5.8S rRNA and LSU-rRNA from tricistronic rRNA transcript (SSU-rRNA, 5.8S rRNA, LSU-rRNA); nuclear periphery; nucleolus; nucleoplasm; preribosome, large subunit precursor; ribosomal large subunit biogenesis; ribosomal large subunit export from nucleus	0.00154336	0.000848313	0.000228835	0.000396354	6.74442	0.000625293	0.000283753	0.000186175	7.6644e-05	3.35863	5.07345e-05	8.78747e-05	0.000201832	0.000175302	0.251369	0.00119722	0.00104078	0.000453286	7.40292e-05	2.64121	0.00100106	9.8015e-05	8.73212e-05	0.000151245	11.4641	0.000847426	0.000121876	0.000232621	0.000212186	3.64295
Suppressor protein SRP40 OS=Saccharomyces cerevisiae (strain ATCC 204508 / S288c) GN=SRP40 PE=1 SV=2	SRP40 YKR092C YKR412A	P32583	4.19	406	41015.4	0	0	0	nucleocytoplasmic transport; nucleolus	0.00147803	0.000431626	4.5767e-05	7.92707e-05	32.2946	0.000187938	9.36174e-05	4.64075e-05	8.03802e-05	4.04973	0.000104217	0.000115443	2.59538e-05	4.49532e-05	4.01548	0.000423544	0.00023728	2.21203e-05	3.83135e-05	19.1473	0.000293368	9.80522e-05	0	0	---	0.000362704	1.44654e-05	4.53309e-05	7.85154e-05	8.00125
Protein PBDC1 homolog OS=Saccharomyces cerevisiae (strain ATCC 204508 / S288c) GN=YPL225W PE=1 SV=1	YPL225W	Q08971	5.24	146	17444.7	0	0	Cytoplasm.	cytoplasm	0.000352706	0.000405939	0	0	---	0.000173396	0.000150166	0.000387911	0.000189853	0.447	0.0005949	0.000517234	0.000356833	0.000253675	1.66716	0.000281556	0.000291664	0	0	---	0.00016543	0.000286534	0	0	---	8.17584e-05	0.00014161	0	0	---
Hit family protein 1 OS=Saccharomyces cerevisiae (strain ATCC 204508 / S288c) GN=HNT1 PE=1 SV=2	HNT1 HIT1 YDL125C	Q04344	6.44	158	17679.6	3	0	0	cytoplasm; hydrolase activity; nucleotide binding; nucleotide metabolic process; nucleus	0.000584145	0.00029478	0.000395974	7.87699e-05	1.47521	0.000807816	0.000742909	0.000842346	0.000112378	0.959007	0.000797103	0.000437824	0.000515635	0.000280022	1.54587	8.11433e-05	0.000140544	0.000293757	0.000265867	0.276226	0.000749955	0.000458	0.000408971	0.000118952	1.83376	0.000460332	0.000218151	0.000118646	0.000205502	3.87986
Tubulin beta chain OS=Saccharomyces cerevisiae (strain ATCC 204508 / S288c) GN=TUB2 PE=1 SV=2	TUB2 YFL037W	P02557	4.63	457	50922.7	0	0	Cytoplasm â€º cytoskeleton.	GTP binding; GTPase activity; cytoplasmic microtubule; homologous chromosome segregation; kinetochore microtubule; mitotic sister chromatid segregation; nuclear microtubule; nuclear migration involved in conjugation with cellular fusion; polar microtubule; protein polymerization; response to antibiotic; spindle pole body; structural constituent of cytoskeleton; tubulin complex	---	---	---	---	---	8.30604e-05	0.000143865	0	0	---	9.91055e-05	3.18668e-05	4.44816e-05	3.86e-05	2.22801	0	0	5.91974e-05	5.89567e-05	0	0.000157033	4.24467e-06	0	0	---	0.000104951	9.08928e-05	0	0	---
Eukaryotic translation initiation factor 2A OS=Saccharomyces cerevisiae (strain ATCC 204508 / S288c) GN=YGR054W PE=1 SV=1	YGR054W	P53235	9.04	642	71304.8	0	0	0	cytosolic small ribosomal subunit; regulation of translation; translation initiation factor activity	5.97994e-05	5.95147e-05	0	0	---	---	---	---	---	---	0.000119247	0.000108878	0	0	---	---	---	---	---	---	---	---	---	---	---	---	---	---	---	---
Profilin OS=Saccharomyces cerevisiae (strain ATCC 204508 / S288c) GN=PFY1 PE=1 SV=2	PFY1 PFY PRF1 YOR122C O3275 YOR3275C	P07274	5.47	126	13677.5	0	0	Cytoplasm â€º cytoskeleton.	actin cytoskeleton organization; actin monomer binding; cytoskeleton; cytosol; extrinsic to plasma membrane; intracellular transport; phosphatidylinositol-4,5-bisphosphate binding; positive regulation of formin-nucleated actin cable assembly; proline-rich region binding; sequestering of actin monomers	0.00127214	0.000893112	0.000208453	0.000203695	6.10276	0.000707407	0.000351786	0.000530118	0.000146552	1.33443	0.000522932	0.000397203	0.000745824	0.000276237	0.701146	0.00166824	0.000275958	0	0	---	0.00152567	0.000471549	0	0	---	0.000958751	0.00058486	0	0	---
Co-chaperone protein SBA1 OS=Saccharomyces cerevisiae (strain ATCC 204508 / S288c) GN=SBA1 PE=1 SV=3	SBA1 YKL117W YKL518	P28707	4.46	216	23950.5	0	0	0	cytoplasm; nucleus; positive regulation of telomere maintenance via telomerase; protein folding; regulation of telomerase activity	0	0	0.000667081	0.000198178	0	0	0	0.000360292	0.000516334	0	9.5362e-05	0.000165172	0.000343677	0.000305728	0.277476	0.000427473	9.44633e-05	0.000385103	0.000336669	1.11002	0.000948111	0.000402728	0.000123099	0.000213213	7.70205	0.00108204	0.000143513	8.52052e-05	0.00014758	12.6992
CTP synthase 1 OS=Saccharomyces cerevisiae (strain ATCC 204508 / S288c) GN=URA7 PE=1 SV=2	URA7 YBL039C YBL0410	P28274	5.67	579	64710.3	6	Pyrimidine metabolism; CTP biosynthesis via de novo pathway; CTP from UDP: step 2/2.	0	'de novo' CTP biosynthetic process; ATP binding; CTP biosynthetic process; CTP synthase activity; cytoophidium; cytoplasm; glutamine metabolic process; phospholipid biosynthetic process; pyrimidine nucleobase biosynthetic process	---	---	---	---	---	8.74818e-05	0.000151523	0	0	---	9.08655e-05	0.000110205	0	0	---	---	---	---	---	---	---	---	---	---	---	---	---	---	---	---
Verprolin OS=Saccharomyces cerevisiae (strain ATCC 204508 / S288c) GN=VRP1 PE=1 SV=2	VRP1 END5 MDP2 YLR337C L8300.13	P37370	9.89	817	82593.6	0	0	Cytoplasm â€º cytoskeleton.	actin cortical patch; actin cortical patch localization; actin filament organization; bipolar cellular bud site selection; cellular bud neck; endocytosis; incipient cellular bud site; mating projection tip	0	0	0.000101458	0.000101016	0	---	---	---	---	---	8.12623e-05	0.000140751	2.61814e-05	4.53475e-05	3.10382	1.56243e-05	2.70621e-05	0	0	---	5.79482e-05	5.02156e-05	0	0	---	0	0	0	0	---
Zinc finger protein ZPR1 OS=Saccharomyces cerevisiae (strain ATCC 204508 / S288c) GN=ZPR1 PE=1 SV=1	ZPR1 YGR211W	P53303	4.76	486	55072	0	0	Cytoplasm. Nucleus.	cellular response to starvation; cytoplasm; nucleus; regulation of mitotic cell cycle; zinc ion binding	---	---	---	---	---	0	0	0.000116533	5.7034e-05	0	0	0	8.73758e-05	7.56759e-05	0	0	0	5.68763e-05	1.93124e-06	0	2.48486e-05	4.3039e-05	0	0	---	0	0	5.89595e-05	0.000102121	0
Protein SMY2 OS=Saccharomyces cerevisiae (strain ATCC 204508 / S288c) GN=SMY2 PE=1 SV=2	SMY2 YBR172C YBR1233	P32909	8.83	740	81396.9	0	0	Cytoplasm.	ER to Golgi vesicle-mediated transport; endoplasmic reticulum membrane; extrinsic to membrane	---	---	---	---	---	---	---	---	---	---	3.58872e-05	6.21585e-05	0	0	---	---	---	---	---	---	---	---	---	---	---	---	---	---	---	---
Nucleoporin NUP1 OS=Saccharomyces cerevisiae (strain ATCC 204508 / S288c) GN=NUP1 PE=1 SV=1	NUP1 YOR098C YOR3182C	P20676	9.63	1076	113581	0	0	Nucleus â€º nuclear pore complex. Nucleus membrane; Peripheral membrane protein; Nucleoplasmic side.	NLS-bearing substrate import into nucleus; nuclear membrane; nuclear pore central transport channel; nuclear pore nuclear basket; nucleocytoplasmic transporter activity; poly(A)+ mRNA export from nucleus; ribosomal large subunit export from nucleus; structural constituent of nuclear pore; transcription-dependent tethering of RNA polymerase II gene DNA at nuclear periphery	---	---	---	---	---	2.35371e-05	4.07675e-05	0	0	---	0	0	1.95859e-05	3.39238e-05	0	0	0	2.66808e-05	4.62126e-05	0	1.12234e-05	1.94396e-05	0	0	---	0	0	0	0	---
Kynureninase OS=Saccharomyces cerevisiae (strain ATCC 204508 / S288c) GN=BNA5 PE=1 SV=1	BNA5 YLR231C L8083.14	Q05979	5.14	453	51032.1	3	Amino-acid degradation; L-kynurenine degradation; L-alanine and anthranilate from L-kynurenine: step 1/1. Cofactor biosynthesis; NAD(+) biosynthesis; quinolinate from L-kynurenine: step 2/3.	Cytoplasm. Nucleus.	L-kynurenine catabolic process; anthranilate metabolic process; cytoplasm; de novo NAD biosynthetic process from tryptophan; kynureninase activity; nucleus; pyridoxal phosphate binding; quinolinate biosynthetic process; tryptophan catabolic process	---	---	---	---	---	2.79313e-05	4.83784e-05	6.37347e-05	6.48642e-05	0.438243	9.58669e-05	8.33512e-05	6.68364e-05	6.49324e-05	1.43435	---	---	---	---	---	---	---	---	---	---	---	---	---	---	---
60S ribosomal protein L29 OS=Saccharomyces cerevisiae (strain ATCC 204508 / S288c) GN=RPL29 PE=1 SV=3	RPL29 YL43 YFR032C-A YFR032BW	P05747	11.32	59	6537.6	0	0	Cytoplasm.	cytoplasmic translation; cytosolic large ribosomal subunit; structural constituent of ribosome	0.001315	0.00110464	0	0	---	0.000861004	0.000368717	0.000972443	0.000507766	0.885403	0.000593087	7.65329e-05	0.00206994	0.00133061	0.286523	---	---	---	---	---	---	---	---	---	---	---	---	---	---	---
Cell wall mannoprotein PIR1 OS=Saccharomyces cerevisiae (strain ATCC 204508 / S288c) GN=PIR1 PE=1 SV=1	PIR1 CCW6 YKL164C YKL618	Q03178	4.87	341	28068.2	0	0	Secreted â€º cell wall.	extracellular region; fungal-type cell wall; fungal-type cell wall organization; intracellular protein transport; structural constituent of cell wall	3.7888e-05	6.5624e-05	0.000900654	0.000155714	0.0420672	0.00022272	0.000192881	0.000445549	4.61263e-05	0.499878	6.69486e-05	0.000115958	0.000480483	0.000173237	0.139336	4.15574e-05	7.19795e-05	0.000192236	0.000173375	0.216178	7.16137e-05	0.000124039	0.000105126	9.10582e-05	0.681219	0.00014591	0.000126552	5.54971e-05	4.80683e-05	2.62915
Peptidyl-prolyl cis-trans isomerase D OS=Saccharomyces cerevisiae (strain ATCC 204508 / S288c) GN=CPR5 PE=1 SV=1	CPR5 CYP5 CYPD YDR304C D9740.14	P35176	5.24	225	22783.6	5	0	Endoplasmic reticulum lumen.	endoplasmic reticulum; endoplasmic reticulum lumen; peptide binding; peptidyl-prolyl cis-trans isomerase activity; protein folding	0.000114843	0.000198913	0.000652427	0.00092382	0.176024	0	0	0.00128237	0.00112276	0	0.000101464	0.000175741	0.000859957	0.000753575	0.117988	0	0	0.000212656	0.000368331	0	0	0	0.000357161	0.000354553	0	0	0	0	0	---
ATP-dependent molecular chaperone HSP82 OS=Saccharomyces cerevisiae (strain ATCC 204508 / S288c) GN=HSP82 PE=1 SV=1	HSP82 HSP90 YPL240C	P02829	4.84	709	81275.2	0	0	Cytoplasm.	'de novo' protein folding; ATP binding; ATPase activity, coupled; box C/D snoRNP assembly; cytoplasm; positive regulation of telomere maintenance via telomerase; proteasome assembly; protein refolding; protein targeting to mitochondrion; response to osmotic stress; unfolded protein binding	0.000995332	0.00069954	0.000122314	0.000149764	8.13751	0.00104013	8.11012e-05	0.0016617	7.75747e-05	0.625945	0.00135359	0.000546321	0.00173201	7.1764e-05	0.781514	0.0022107	0.000804084	0.000920484	0.000169484	2.40167	0.00215965	9.42612e-05	0.000930142	9.21896e-05	2.32185	0.00188819	0.000192706	0.000752532	0.000132288	2.50911
60S ribosomal protein L4-A OS=Saccharomyces cerevisiae (strain ATCC 204508 / S288c) GN=RPL4A PE=1 SV=4	RPL4A RPL2 RPL2A YBR031W YBR0315	P10664	10.64	362	38960.9	0	0	Cytoplasm.	RNA binding; cytoplasmic translation; cytosolic large ribosomal subunit; structural constituent of ribosome	0.000546624	0.000130448	0	0	---	0.00351053	0.000402429	0.00324658	0.000402101	1.0813	0.00423975	0.000921219	0.00301035	0.000415196	1.40839	0.000573044	0.000292863	0	0	---	0.000523652	0.000332698	0.000146902	0.000254442	3.56463	0.000446895	0.000257707	2.54204e-05	4.40293e-05	17.5802
Trehalose synthase complex regulatory subunit TSL1 OS=Saccharomyces cerevisiae (strain ATCC 204508 / S288c) GN=TSL1 PE=1 SV=1	TSL1 YML100W	P38427	6.17	1098	123018	0	0	Cytoplasm.	alpha,alpha-trehalose-phosphate synthase complex (UDP-forming); catalytic activity; enzyme regulator activity; trehalose biosynthetic process	1.24979e-05	2.16469e-05	8.26005e-05	5.86857e-05	0.151305	0.000138652	5.93577e-05	2.57397e-05	4.45824e-05	5.38672	0.000108838	0.000188513	0	0	---	0	0	7.5758e-05	6.62299e-05	0	0.000130839	3.40957e-05	8.49303e-05	7.36405e-05	1.54055	0.000177078	6.4626e-05	0.000119382	1.30385e-05	1.48328
DNA ligase 4 OS=Saccharomyces cerevisiae (strain ATCC 204508 / S288c) GN=DNL4 PE=1 SV=1	DNL4 LIG4 YOR005C UND407 UNE452	Q08387	8.65	944	108515	6	0	Nucleus.	ATP binding; DNA binding; DNA ligase (ATP) activity; DNA ligase IV complex; DNA ligation involved in DNA repair; DNA recombination; DNA replication; cell cycle; cell division; double-strand break repair via nonhomologous end joining; metal ion binding; replicative cell aging	---	---	---	---	---	---	---	---	---	---	0	0	2.26591e-05	3.92467e-05	0	---	---	---	---	---	---	---	---	---	---	---	---	---	---	---
Actin-interacting protein 1 OS=Saccharomyces cerevisiae (strain ATCC 204508 / S288c) GN=AIP1 PE=1 SV=1	AIP1 YMR092C YM9582.17C	P46680	5.35	615	67325.5	0	0	Cytoplasm â€º cytoskeleton. Cytoplasm â€º cytoskeleton â€º actin patch.	actin cortical patch; actin filament depolymerization; mating projection tip; nucleus; response to osmotic stress	0.000106045	7.19422e-05	0	0	---	4.14528e-05	3.59015e-05	6.12426e-05	6.8981e-05	0.676863	0	0	4.92307e-05	4.78283e-05	0	---	---	---	---	---	---	---	---	---	---	---	---	---	---	---
Argininosuccinate lyase OS=Saccharomyces cerevisiae (strain ATCC 204508 / S288c) GN=ARG4 PE=1 SV=2	ARG4 YHR018C	P04076	5.47	463	51989.1	4	Amino-acid biosynthesis; L-arginine biosynthesis; L-arginine from L-ornithine and carbamoyl phosphate: step 3/3.	0	arginine biosynthetic process via ornithine; argininosuccinate lyase activity; cytosol	8.3316e-05	8.37165e-05	0	0	---	5.4656e-05	9.46671e-05	6.18395e-05	6.10571e-05	0.883837	2.22443e-05	3.85282e-05	0.000154815	7.44139e-05	0.143683	0	0	2.06685e-05	3.57989e-05	0	0	0	2.07124e-05	3.58749e-05	0	0	0	6.07326e-05	0.000105192	0
40S ribosomal protein S27-B OS=Saccharomyces cerevisiae (strain ATCC 204508 / S288c) GN=RPS27B PE=1 SV=1	RPS27B YHR021C	P38711	9.36	82	8865.34	0	0	Cytoplasm.	cytoplasmic translation; cytosolic small ribosomal subunit; endonucleolytic cleavage of tricistronic rRNA transcript (SSU-rRNA, 5.8S rRNA, LSU-rRNA); maturation of SSU-rRNA from tricistronic rRNA transcript (SSU-rRNA, 5.8S rRNA, LSU-rRNA); metal ion binding; ribosomal small subunit assembly; structural constituent of ribosome	0.00128535	0.000309269	0.00188103	0.000575664	0.683324	0.00201257	0.00192401	0.000922023	0.000992456	2.18277	0.00286902	0.00123624	0.000367305	0.00035855	7.811	---	---	---	---	---	---	---	---	---	---	---	---	---	---	---
Trehalose-phosphatase OS=Saccharomyces cerevisiae (strain ATCC 204508 / S288c) GN=TPS2 PE=1 SV=3	TPS2 PFK3 YDR074W YD8554.07	P31688	8.32	896	102976	3	0	Cytoplasm.	alpha,alpha-trehalose-phosphate synthase complex (UDP-forming); mitochondrion; response to stress; trehalose biosynthetic process; trehalose-phosphatase activity	---	---	---	---	---	---	---	---	---	---	7.47824e-05	2.9531e-05	0	0	---	---	---	---	---	---	---	---	---	---	---	---	---	---	---	---
Protein GVP36 OS=Saccharomyces cerevisiae (strain ATCC 204508 / S288c) GN=GVP36 PE=1 SV=1	GVP36 YIL041W	P40531	4.91	326	36538.9	0	0	Golgi apparatus membrane; Peripheral membrane protein.	endocytosis; establishment or maintenance of actin cytoskeleton polarity; integral to Golgi membrane; vacuole organization	---	---	---	---	---	0.000233482	0.000115621	0.000233393	5.24207e-05	1.00038	0.000255406	9.68232e-05	0.000157035	0.000146829	1.62643	0.000200437	6.06485e-05	0	0	---	3.55687e-05	6.16068e-05	2.71874e-05	4.709e-05	1.30828	0	0	0	0	---
Transcription factor SPN1 OS=Saccharomyces cerevisiae (strain ATCC 204508 / S288c) GN=SPN1 PE=1 SV=1	SPN1 IWS1 YPR133C	Q06505	6.97	410	46082.5	0	0	Nucleus.	DNA binding; RNA polymerase II transcription factor binding transcription factor activity; core RNA polymerase II binding transcription factor activity; nucleus; poly(A)+ mRNA export from nucleus; regulation of transcription by chromatin organization; regulation of transcription elongation from RNA polymerase II promoter	0.000163433	0.000152242	2.08479e-05	3.61096e-05	7.83931	---	---	---	---	---	2.78408e-05	4.82217e-05	7.78718e-05	7.82596e-05	0.357522	6.58334e-05	5.72271e-05	0	0	---	8.60176e-05	8.48688e-05	0	0	---	9.00541e-05	8.81936e-05	0	0	---
Carboxypeptidase S OS=Saccharomyces cerevisiae (strain ATCC 204508 / S288c) GN=CPS1 PE=1 SV=2	CPS1 CPS YJL172W J0510	P27614	5.3	576	64597	3	0	Vacuole membrane; Single-pass membrane protein.	carboxypeptidase activity; fungal-type vacuole lumen; integral to membrane; metal ion binding; metallocarboxypeptidase activity; nitrogen compound metabolic process; proteolysis involved in cellular protein catabolic process; vacuolar membrane	0.0001143	4.10341e-05	0.000124748	2.59701e-05	0.916247	4.42595e-05	3.83324e-05	9.9191e-05	4.94624e-05	0.446205	0.000122799	0.000108864	0.00010458	0.000102087	1.17421	0.000932136	0.000231992	0.000334519	0.000119512	2.78649	0.000874265	0.000146501	0.000221843	4.80602e-05	3.94093	0.000632106	0.000275695	0.000293606	0.000101487	2.15291
60S ribosomal protein L36-A OS=Saccharomyces cerevisiae (strain ATCC 204508 / S288c) GN=RPL36A PE=1 SV=3	RPL36A RPL39A YMR194W YM9646.06	P05745	11.6	100	10993	0	0	Cytoplasm.	RNA binding; cytoplasmic translation; cytosolic large ribosomal subunit; structural constituent of ribosome	0.00271147	0.0022896	0.000512859	0.000888297	5.28697	0.00737749	0.00146033	0.00237568	0.000438101	3.10541	0.0112744	0.00120149	0.00299695	0.000188946	3.76194	0.00788216	0.00131497	0.000637866	0.000303825	12.3571	0.00575822	0.00109224	0.000649487	0.000589529	8.8658	0.00513286	0.00148272	0.00056075	0.000278616	9.15356
Protein GRE1 OS=Saccharomyces cerevisiae (strain ATCC 204508 / S288c) GN=GRE1 PE=1 SV=1	GRE1 YPL223C	Q08969	4.55	168	19025.6	0	0	Cytoplasm.	cytoplasm; response to stress	0.000792931	0.000687633	0.0103208	0.00684179	0.0768283	0.000378809	0.000132418	0.000228702	0.000198172	1.65634	0	0	0.000500149	0.00029571	0	0.000160665	0.000139661	0.00229714	0.000214013	0.0699413	0.0024838	0.000372018	0.00179717	9.45847e-05	1.38206	0.00277235	2.30718e-05	0.00184163	3.43069e-05	1.50538
Uncharacterized protein MRP8 OS=Saccharomyces cerevisiae (strain ATCC 204508 / S288c) GN=MRP8 PE=1 SV=1	MRP8 YKL142W YKL3	P35719	4.66	219	25097.2	0	0	Cytoplasm.	cytoplasm	0	0	0.00274026	0.000391798	0	0	0	0.000435738	0.000157234	0	0	0	0.000283317	1.32319e-05	0	0	0	0.00235613	0.000207472	0	0.000111508	0.000193138	0.00271654	0.000462713	0.0410478	5.49978e-05	9.5259e-05	0.00252344	0.000151029	0.0217948
Probable proteasome subunit alpha type-7 OS=Saccharomyces cerevisiae (strain ATCC 204508 / S288c) GN=PRE10 PE=1 SV=2	PRE10 PRC1 PRS1 YOR362C O6650	P21242	5.02	288	31404.9	3	0	Cytoplasm. Nucleus.	mRNA binding; nuclear outer membrane-endoplasmic reticulum membrane network; nucleus; proteasomal ubiquitin-dependent protein catabolic process; proteasomal ubiquitin-independent protein catabolic process; proteasome core complex, alpha-subunit complex; proteasome storage granule; threonine-type endopeptidase activity	---	---	---	---	---	8.78672e-05	0.00015219	9.89663e-05	2.69709e-06	0.88785	0.000117627	0.000108768	0.000211751	0.000183752	0.555495	---	---	---	---	---	---	---	---	---	---	---	---	---	---	---
Succinyl-CoA ligase [ADP-forming] subunit alpha, mitochondrial OS=Saccharomyces cerevisiae (strain ATCC 204508 / S288c) GN=LSC1 PE=1 SV=1	LSC1 YOR142W YOR3352W	P53598	UNDEFINED	329	0	6	Carbohydrate metabolism; tricarboxylic acid cycle; succinate from succinyl-CoA (ligase route): step 1/1.	Mitochondrion.	ATP binding; ATP citrate synthase activity; GTP binding; cofactor binding; mitochondrial nucleoid; succinate-CoA ligase (ADP-forming) activity; succinyl-CoA metabolic process; tricarboxylic acid cycle	---	---	---	---	---	0.000348318	0.00020168	0.000114481	0.000128946	3.04258	0.000137663	4.42649e-05	9.38156e-05	9.61644e-05	1.46738	4.30731e-05	7.46049e-05	0	0	---	0.000399142	5.70789e-05	2.91485e-05	5.04866e-05	13.6934	0.000408585	4.98577e-05	0	0	---
ADP-ribose pyrophosphatase OS=Saccharomyces cerevisiae (strain ATCC 204508 / S288c) GN=YSA1 PE=1 SV=2	YSA1 YBR111C YBR0907	Q01976	6.02	231	26087	3	0	0	ADP-ribose diphosphatase activity; metal ion binding; mitochondrion; nucleus; ribose phosphate metabolic process	---	---	---	---	---	---	---	---	---	---	0.000114963	0.000199122	0.000226214	8.5813e-05	0.508205	0.000399474	8.65491e-05	3.88781e-05	6.73388e-05	10.275	0.000104558	0.000181099	0	0	---	0.000104282	0.000180621	8.19243e-05	7.0958e-05	1.2729
Protein HRI1 OS=Saccharomyces cerevisiae (strain ATCC 204508 / S288c) GN=HRI1 PE=1 SV=1	HRI1 YLR301W	Q05905	5.1	244	27500.7	0	0	Cytoplasm. Nucleus.	cotranslational protein targeting to membrane; endoplasmic reticulum membrane; nucleus	0.00124698	0.00045261	0	0	---	0.000157024	0.000157757	0.00100354	0.000464436	0.15647	0	0	0.000508577	2.37524e-05	0	0.000767678	0.000286638	0.000115245	0.000117732	6.66125	0.000241553	0.000219167	3.63242e-05	6.29153e-05	6.64994	0.00021038	0.000364388	0	0	---
Protein SSP120 OS=Saccharomyces cerevisiae (strain ATCC 204508 / S288c) GN=SSP120 PE=1 SV=1	SSP120 YLR250W L9672.4	P39931	4.84	234	24767.4	0	0	0	calcium ion binding; cytoplasm	5.44261e-05	9.42687e-05	0.00169791	0.00103795	0.0320547	0	0	0.00064873	5.83605e-05	0	0	0	0.000620373	0.000166327	0	0	0	0.00125552	0.000211203	0	0.000561758	8.57093e-05	0.000902766	9.68529e-05	0.622263	0.00025644	0.000235579	0.00108253	0.00013004	0.236891
Phosphatidylinositol 4-kinase STT4 OS=Saccharomyces cerevisiae (strain ATCC 204508 / S288c) GN=STT4 PE=1 SV=1	STT4 YLR305C L2142.4	P37297	7.25	1900	214607	2	0	0	1-phosphatidylinositol 4-kinase activity; ATP binding; mitochondrion; phosphatidylinositol-mediated signaling; plasma membrane	---	---	---	---	---	---	---	---	---	---	1.08412e-05	1.87774e-05	0	0	---	---	---	---	---	---	---	---	---	---	---	---	---	---	---	---
Homoisocitrate dehydrogenase, mitochondrial OS=Saccharomyces cerevisiae (strain ATCC 204508 / S288c) GN=LYS12 PE=1 SV=1	LYS12 LYS10 LYS11 YIL094C YI9910.02C	P40495	5.93	371	37720.2	1	Amino-acid biosynthesis; L-lysine biosynthesis via AAA pathway; L-alpha-aminoadipate from 2-oxoglutarate: step 4/5.	Mitochondrion.	NAD binding; homoisocitrate dehydrogenase activity; lysine biosynthetic process; lysine biosynthetic process via aminoadipic acid; magnesium ion binding; mitochondrion	---	---	---	---	---	---	---	---	---	---	0.000186621	0.000158585	0	0	---	7.26041e-05	6.31334e-05	2.42071e-05	4.19279e-05	2.99929	0	0	0	0	---	9.65234e-05	0.000167183	7.62738e-05	7.57975e-05	1.26549
Nuclear GTP-binding protein NUG1 OS=Saccharomyces cerevisiae (strain ATCC 204508 / S288c) GN=NUG1 PE=1 SV=1	NUG1 YER006W	P40010	8.92	520	57708.7	0	0	Nucleus.	GTP binding; GTPase activity; RNA binding; nucleolus; preribosome, large subunit precursor; protein transport; rRNA processing; ribosomal large subunit export from nucleus	---	---	---	---	---	---	---	---	---	---	6.15634e-05	5.9534e-05	0	0	---	---	---	---	---	---	---	---	---	---	---	---	---	---	---	---
Cell wall assembly regulator SMI1 OS=Saccharomyces cerevisiae (strain ATCC 204508 / S288c) GN=SMI1 PE=1 SV=1	SMI1 KNR4 KTR4 YGR229C G8553	P32566	4.59	505	57079.4	0	0	Nucleus.	DNA binding; cell wall biogenesis; cellular bud neck; incipient cellular bud site; mating projection tip; nucleus; regulation of fungal-type cell wall biogenesis; regulation of mitotic cell cycle; regulation of transcription, DNA-dependent; transcription, DNA-dependent	---	---	---	---	---	---	---	---	---	---	0	0	8.40884e-05	7.28287e-05	0	0	0	0	0	---	0	0	5.30437e-05	5.26564e-05	0	0	0	0	0	---
V-type proton ATPase subunit D OS=Saccharomyces cerevisiae (strain ATCC 204508 / S288c) GN=VMA8 PE=1 SV=1	VMA8 YEL051W SYGP-ORF11	P32610	5.79	256	29194	0	0	0	fungal-type vacuole membrane; integral to membrane; proton-transporting ATPase activity, rotational mechanism; vacuolar acidification; vacuolar proton-transporting V-type ATPase, V1 domain	0.00030065	0.000260391	0	0	---	---	---	---	---	---	0.000358196	4.51704e-05	0	0	---	0.000199454	0.000345464	0	0	---	4.52946e-05	7.84525e-05	3.46215e-05	5.99662e-05	1.30828	0.000147308	0.000150483	0	0	---
Cell division control protein 3 OS=Saccharomyces cerevisiae (strain ATCC 204508 / S288c) GN=CDC3 PE=1 SV=3	CDC3 YLR314C L8543.7	P32457	5.32	520	59923.1	0	0	Membrane; Peripheral membrane protein. Bud neck.	1-phosphatidylinositol binding; GTP binding; ascospore wall; cellular bud neck septin ring; cytokinesis; maintenance of cell polarity; mating projection base; prospore membrane; septin complex; septin filament array; septin ring assembly; septin ring disassembly; structural molecule activity	---	---	---	---	---	---	---	---	---	---	0.000110488	9.65013e-05	1.88286e-05	3.26121e-05	5.86809	---	---	---	---	---	---	---	---	---	---	---	---	---	---	---
Cluster of ADP,ATP carrier protein 2 OS=Saccharomyces cerevisiae (strain ATCC 204508 / S288c) GN=PET9 PE=1 SV=2 (ADT2_YEAST)	PET9 AAC2 YBL030C YBL0421	P18239	9.8	318	34426.2	0	0	Mitochondrion inner membrane; Multi-pass membrane protein.	ADP transport; ATP transport; ATP:ADP antiporter activity; aerobic respiration; anaerobic respiration; apoptotic process; heme transport; integral to membrane; mitochondrial inner membrane; mitochondrial transport	---	---	---	---	---	0.000159219	0.000137888	0	0	---	0.000370674	0.000443133	0	0	---	0.000696896	0.000256201	0.000552793	0.000192759	1.26068	0.000635176	0.000214815	0.000460058	0.000194283	1.38064	0.000456758	0.000384697	0.000324857	5.58894e-05	1.40603
Altered inheritance of mitochondria protein 41, mitochondrial OS=Saccharomyces cerevisiae (strain ATCC 204508 / S288c) GN=AIM41 PE=1 SV=1	AIM41 YOR215C YOR50-5	Q12032	8.91	185	15201.7	0	0	Mitochondrion.	carbon-nitrogen ligase activity, with glutamine as amido-N-donor; mitochondrion	---	---	---	---	---	0.000136897	0.000237113	0	0	---	0.000531915	0.000477566	0	0	---	0.000415203	0.000415806	0.000649389	0.000109627	0.639375	0.000901182	0.000196653	0.00069071	0.000149636	1.30472	0.000583036	0.00051347	0.000503881	0.000534207	1.15709
rRNA 2'-O-methyltransferase fibrillarin OS=Saccharomyces cerevisiae (strain ATCC 204508 / S288c) GN=NOP1 PE=1 SV=1	NOP1 LOT3 YDL014W D2870	P15646	10.24	327	34465.3	2	0	Nucleus â€º nucleolus.	90S preribosome; RNA binding; box C/D snoRNA 3'-end processing; box C/D snoRNP complex; rRNA methyltransferase activity; small-subunit processome; tRNA processing	---	---	---	---	---	0.000272036	6.62595e-05	2.88096e-05	4.98996e-05	9.44255	0.00040753	0.000259421	0	0	---	---	---	---	---	---	---	---	---	---	---	---	---	---	---	---
60S ribosomal protein L15-A OS=Saccharomyces cerevisiae (strain ATCC 204508 / S288c) GN=RPL15A PE=1 SV=3	RPL15A RPL10A RPL13A YL10A YLR029C	P05748	11.38	204	24291	0	0	Cytoplasm.	RNA binding; cytoplasmic translation; cytosolic large ribosomal subunit; structural constituent of ribosome	0.000197868	0.000201919	0	0	---	0.0024292	0.000306299	0.00158307	7.97392e-05	1.53449	0.00336425	0.00102454	0.00167359	0.000185925	2.0102	6.25737e-05	0.000108381	0	0	---	0	0	0	0	---	0.000184857	0.000188842	0	0	---
Coatomer subunit gamma OS=Saccharomyces cerevisiae (strain ATCC 204508 / S288c) GN=SEC21 PE=1 SV=2	SEC21 YNL287W N0543	P32074	5	935	104831	0	0	Cytoplasm. Golgi apparatus membrane; Peripheral membrane protein; Cytoplasmic side. Cytoplasmic vesicle â€º COPI-coated vesicle membrane; Peripheral membrane protein; Cytoplasmic side. Endosome.	COPI vesicle coat; ER to Golgi vesicle-mediated transport; endosome; intracellular protein transport; retrograde vesicle-mediated transport, Golgi to ER; structural molecule activity	---	---	---	---	---	5.41516e-05	4.68966e-05	5.07734e-05	6.2736e-05	1.06653	4.64467e-05	4.0383e-05	1.12698e-05	1.95198e-05	4.12136	---	---	---	---	---	---	---	---	---	---	---	---	---	---	---
Transcription initiation factor IIF subunit beta OS=Saccharomyces cerevisiae (strain ATCC 204508 / S288c) GN=TFG2 PE=1 SV=2	TFG2 YGR005C	P41896	6.72	400	46605.4	3	0	Nucleus.	ATP binding; DNA binding; RNA polymerase II transcriptional preinitiation complex assembly; core RNA polymerase II binding transcription factor activity; helicase activity; promoter clearance from RNA polymerase II promoter; regulation of transcription, DNA-dependent; transcription elongation from RNA polymerase II promoter; transcription factor TFIIF complex; transcriptional start site selection…	---	---	---	---	---	---	---	---	---	---	0.000205367	0.000108993	0	0	---	0.000191893	0.000166185	0	0	---	0.000117491	0.000132365	0	0	---	0.000119906	0.000103845	0	0	---
Down-regulator of invasive growth 1 OS=Saccharomyces cerevisiae (strain ATCC 204508 / S288c) GN=DIG1 PE=1 SV=1	DIG1 RST1 YPL049C P7102.02	Q03063	8.62	452	49356.2	0	0	Nucleus.	DNA binding; negative regulation of invasive growth in response to glucose limitation; negative regulation of pseudohyphal growth; negative regulation of transcription from RNA polymerase II promoter by pheromones; nucleus; transcription factor binding	---	---	---	---	---	0.000111995	0.000128273	0	0	---	8.81301e-05	0.000152646	2.33124e-05	4.03783e-05	3.78039	---	---	---	---	---	---	---	---	---	---	---	---	---	---	---
Histone H2A.Z-specific chaperone CHZ1 OS=Saccharomyces cerevisiae (strain ATCC 204508 / S288c) GN=CHZ1 PE=1 SV=2	CHZ1 YER030W	P40019	4.44	153	17462.5	0	0	Nucleus.	chromatin remodeling; nucleus	0.00164202	0.00100584	0.00383895	0.000804027	0.427727	---	---	---	---	---	7.46062e-05	0.000129222	0.000732438	0.000481526	0.10186	0	0	0.00307444	0.000271789	0	0.000540814	0.000340036	0.00216961	0.000567751	0.249268	0.000161895	0.00014048	0.00214247	0.000177009	0.0755645
ATPase-stabilizing factor 15 kDa protein OS=Saccharomyces cerevisiae (strain ATCC 204508 / S288c) GN=STF2 PE=1 SV=2	STF2 YGR008C G3858	P16965	7.93	84	9483.33	0	0	Mitochondrion.	cellular response to desiccation; cytoplasm; mitochondrion	0.00427047	0.00259865	0.0393493	0.0166297	0.108527	0.000456238	0.000458245	0	0	---	0.00155856	0.00235529	0.000242001	0.000210003	6.4403	0.0188721	0.00461067	0.0169741	0.00113626	1.11182	0.0263183	0.00340889	0.0122144	0.000646704	2.15468	0.0240099	0.00288811	0.0136192	0.00170536	1.76294
Stress protein DDR48 OS=Saccharomyces cerevisiae (strain ATCC 204508 / S288c) GN=DDR48 PE=1 SV=4	DDR48 FSP YMR173W YM8010.03	P18899	4.22	430	46102	0	0	0	ATPase activity; DNA repair; GTPase activity; cytoplasm	0.0019285	0.00106197	0.00697359	0.000366993	0.276543	8.91256e-05	8.95177e-05	0.000200014	7.18271e-05	0.445598	5.30918e-05	9.19577e-05	0.000309622	9.51439e-05	0.171473	0	0	0.000449387	0.000165975	0	5.50507e-05	4.77049e-05	0.000425597	2.14746e-05	0.129349	5.6021e-05	9.70313e-05	0.000699779	0.000275488	0.0800554
V-type proton ATPase subunit C OS=Saccharomyces cerevisiae (strain ATCC 204508 / S288c) GN=VMA5 PE=1 SV=4	VMA5 VAT3 VATC YKL080W YKL410	P31412	6.24	392	44057.3	0	0	Vacuole membrane; Peripheral membrane protein.	ATP binding; ATP hydrolysis coupled proton transport; fungal-type vacuole membrane; integral to membrane; proton-transporting ATPase activity, rotational mechanism; vacuolar acidification; vacuolar proton-transporting V-type ATPase, V1 domain	---	---	---	---	---	0.000194676	0.000193827	0.000215584	0.000140306	0.903016	0.00023677	0.000100196	2.72834e-05	4.72563e-05	8.67816	0.000173722	0.000131319	0	0	---	8.99674e-05	8.87658e-05	0	0	---	9.62011e-05	9.82747e-05	0	0	---
Anthranilate synthase component 1 OS=Saccharomyces cerevisiae (strain ATCC 204508 / S288c) GN=TRP2 PE=1 SV=4	TRP2 YER090W	P00899	5.56	507	56636.4	4	Amino-acid biosynthesis; L-tryptophan biosynthesis; L-tryptophan from chorismate: step 1/5.	0	anthranilate synthase activity; anthranilate synthase complex; tryptophan biosynthetic process	---	---	---	---	---	0.000100216	4.29946e-05	1.93102e-05	3.34462e-05	5.18979	0.000115522	4.51356e-05	1.93114e-05	3.34484e-05	5.98204	0	0	1.7932e-05	3.10591e-05	0	0	0	0	0	---	4.70877e-05	8.15583e-05	1.88391e-05	3.26304e-05	2.49946
Pleiotropic ABC efflux transporter of multiple drugs OS=Saccharomyces cerevisiae (strain ATCC 204508 / S288c) GN=PDR5 PE=1 SV=1	PDR5 LEM1 STS1 YDR1 YOR153W	P33302	8.02	1511	170438	0	0	Cell membrane; Multi-pass membrane protein.	ATP binding; integral to membrane; mitochondrion; plasma membrane; response to antibiotic; response to cycloheximide; xenobiotic-transporting ATPase activity	---	---	---	---	---	---	---	---	---	---	5.02598e-05	5.28992e-05	0	0	---	---	---	---	---	---	---	---	---	---	---	---	---	---	---	---
Histone H4 OS=Saccharomyces cerevisiae (strain ATCC 204508 / S288c) GN=HHF1 PE=1 SV=2	HHF1 YBR009C YBR0122; HHF2 YNL030W N2752	P02309	11.36	103	11237.1	0	0	Nucleus. Chromosome.	DNA binding; chromatin assembly or disassembly; histone H3-K79 methylation; nuclear nucleosome; nucleosome assembly; replication fork protection complex; sexual sporulation resulting in formation of a cellular spore	---	---	---	---	---	0.000491668	0.000563421	9.14634e-05	0.000158419	5.37558	0.00136975	0.00041095	0	0	---	0.000123932	0.000214657	0	0	---	0.000349667	0.000355785	0	0	---	0.000233874	0.000405082	0	0	---
Mitochondrial import receptor subunit TOM70 OS=Saccharomyces cerevisiae (strain ATCC 204508 / S288c) GN=TOM70 PE=1 SV=2	TOM70 MAS70 OMP1 YNL121C N1905	P07213	5.24	617	70123.2	0	0	Mitochondrion outer membrane; Single-pass membrane protein.	P-P-bond-hydrolysis-driven protein transmembrane transporter activity; integral to mitochondrial outer membrane; mitochondrial outer membrane translocase complex; mitochondrion targeting sequence binding; protein import into mitochondrial inner membrane; protein import into mitochondrial matrix	---	---	---	---	---	0	0	3.01177e-05	5.21654e-05	0	8.12543e-05	0.000100537	0	0	---	0	0	1.55098e-05	2.68637e-05	0	0	0	0	0	---	0	0	6.19219e-05	0.000107252	0
Mediator of RNA polymerase II transcription subunit 15 OS=Saccharomyces cerevisiae (strain ATCC 204508 / S288c) GN=GAL11 PE=1 SV=3	GAL11 ABE1 MED15 RAR3 SDS4 SPT13 YOL051W	P19659	9.81	1081	120309	0	0	Nucleus.	RNA polymerase II activating transcription factor binding; RNA polymerase II transcription coactivator activity involved in preinitiation complex assembly; RNA polymerase II transcription factor recruiting transcription factor activity; TFIIE-class binding transcription factor activity; TFIIE-class transcription factor binding; TFIIH-class transcription factor binding; core mediator complex; medi…	---	---	---	---	---	---	---	---	---	---	2.45666e-05	4.25507e-05	0	0	---	---	---	---	---	---	---	---	---	---	---	---	---	---	---	---
Importin subunit beta-1 OS=Saccharomyces cerevisiae (strain ATCC 204508 / S288c) GN=KAP95 PE=1 SV=1	KAP95 YLR347C L8300.15	Q06142	4.52	861	94775.8	0	0	Cytoplasm. Nucleus envelope.	Ran guanyl-nucleotide exchange factor activity; cytoplasm; nuclear pore; nuclear pore complex assembly; phosphatidylcholine biosynthetic process; protein import into nucleus; protein targeting to membrane; protein transporter activity; regulation of protein desumoylation	---	---	---	---	---	0	0	6.5349e-05	6.56517e-05	0	3.84769e-05	3.98359e-05	1.22384e-05	2.11975e-05	3.14396	---	---	---	---	---	---	---	---	---	---	---	---	---	---	---
Pyruvate kinase 2 OS=Saccharomyces cerevisiae (strain ATCC 204508 / S288c) GN=PYK2 PE=1 SV=1	PYK2 YOR347C O6342	P52489	6.43	506	55195.2	2	Carbohydrate degradation; glycolysis; pyruvate from D-glyceraldehyde 3-phosphate: step 5/5.	0	ATP binding; glycolysis; magnesium ion binding; mitochondrion; potassium ion binding; pyruvate kinase activity; pyruvate metabolic process	0.00059546	2.28871e-05	0	0	---	0.000377543	0.000328706	0.000318879	6.28764e-05	1.18397	0.000437485	6.15903e-05	0.000167532	0.000157416	2.61135	0.0003194	0.000277737	0	0	---	6.87475e-05	0.000119074	0	0	---	0.000199566	0.000222525	0	0	---
60S ribosomal protein L17-A OS=Saccharomyces cerevisiae (strain ATCC 204508 / S288c) GN=RPL17A PE=1 SV=4	RPL17A RPL17 RPL20A YKL180W	P05740	10.92	184	20418.3	0	0	Cytoplasm.	cytoplasmic translation; cytosolic large ribosomal subunit; structural constituent of ribosome	0.00163351	0.000826645	0	0	---	0.00580494	0.000213576	0.00263608	0.000225735	2.20211	0.0073749	0.00113753	0.00233761	0.000606527	3.15489	0.0024938	0.00064355	0	0	---	0.0013054	0.000329772	0	0	---	0.00112585	0.000266593	0	0	---
Uncharacterized protein YNR034W-A OS=Saccharomyces cerevisiae (strain ATCC 204508 / S288c) GN=YNR034W-A PE=1 SV=1	YNR034W-A	Q3E841	8.93	98	10781.4	0	0	Cytoplasm.	cytoplasm	0.00256289	0.000918029	0.0147243	0.00758536	0.174058	0.000645555	0.00111813	0.00204606	0.000638027	0.315511	0	0	0.00188693	0.000819818	0	0.0108231	0.000800834	0.0361506	0.000884435	0.29939	0.0100042	7.90362e-05	0.0417539	0.00443839	0.239598	0.00926158	0.000433124	0.0445196	0.00444747	0.208034
Protein BOB1 OS=Saccharomyces cerevisiae (strain ATCC 204508 / S288c) GN=BOI1 PE=1 SV=1	BOI1 BOB1 GIN7 YBL085W YBL0717	P38041	9.13	980	109295	0	0	0	budding cell apical bud growth; cellular bud neck; cytokinesis, completion of separation; cytoplasm; mating projection tip; phospholipid binding; plasma membrane	---	---	---	---	---	---	---	---	---	---	0	0	3.18174e-05	3.27791e-05	0	---	---	---	---	---	---	---	---	---	---	---	---	---	---	---
Tricalbin-1 OS=Saccharomyces cerevisiae (strain ATCC 204508 / S288c) GN=TCB1 PE=1 SV=1	TCB1 YOR086C YOR3141c	Q12466	6.74	1186	133576	0	0	Cell membrane; Multi-pass membrane protein.	calcium-dependent phospholipid binding; cortical endoplasmic reticulum; endoplasmic reticulum membrane organization; integral to membrane; lipid binding; metal ion binding; mitochondrion; plasma membrane; regulation of phosphatidylinositol dephosphorylation	---	---	---	---	---	---	---	---	---	---	1.92491e-05	3.33405e-05	8.88467e-06	1.53887e-05	2.16656	---	---	---	---	---	---	---	---	---	---	---	---	---	---	---
4-nitrophenylphosphatase OS=Saccharomyces cerevisiae (strain ATCC 204508 / S288c) GN=PHO13 PE=1 SV=2	PHO13 YDL236W	P19881	6	312	34624.6	3	0	0	4-nitrophenylphosphatase activity; alkaline phosphatase activity; cytoplasm; nucleus; phosphoprotein phosphatase activity; protein dephosphorylation	0.000287507	0.000255785	0	0	---	8.11082e-05	0.000140483	9.05839e-05	0.000156896	0.895393	0.000168625	0.000204516	6.75463e-05	0.000116994	2.49644	---	---	---	---	---	---	---	---	---	---	---	---	---	---	---
Meiotic sister-chromatid recombination protein 3 OS=Saccharomyces cerevisiae (strain ATCC 204508 / S288c) GN=MSC3 PE=1 SV=1	MSC3 YLR219W	Q05812	9.14	728	80530.3	0	0	Cell membrane; Peripheral membrane protein.	plasma membrane; reciprocal meiotic recombination	---	---	---	---	---	---	---	---	---	---	3.64788e-05	6.31831e-05	0	0	---	---	---	---	---	---	---	---	---	---	---	---	---	---	---	---
Serine/threonine-protein phosphatase PP-Z1 OS=Saccharomyces cerevisiae (strain ATCC 204508 / S288c) GN=PPZ1 PE=1 SV=5	PPZ1 YML016C YM9571.02C	P26570	8.51	692	77359.4	3	0	0	cellular protein localization; cellular sodium ion homeostasis; cofactor binding; cytoplasm; extrinsic to plasma membrane; magnesium-dependent protein serine/threonine phosphatase activity; metal ion binding; nucleus; protein dephosphorylation; protein serine/threonine phosphatase activity	---	---	---	---	---	---	---	---	---	---	1.48831e-05	2.57783e-05	0.000133415	3.95182e-05	0.111555	---	---	---	---	---	---	---	---	---	---	---	---	---	---	---
Serine/threonine-protein kinase HAL5 OS=Saccharomyces cerevisiae (strain ATCC 204508 / S288c) GN=HAL5 PE=1 SV=2	HAL5 YJL165C J0531	P38970	8.63	855	95454.9	2	0	0	ATP binding; cellular cation homeostasis; cellular protein localization; protein dephosphorylation; protein kinase activity; protein serine/threonine kinase activity	---	---	---	---	---	---	---	---	---	---	0	0	3.52269e-05	3.43873e-05	0	---	---	---	---	---	---	---	---	---	---	---	---	---	---	---
S-adenosylmethionine synthase 1 OS=Saccharomyces cerevisiae (strain ATCC 204508 / S288c) GN=SAM1 PE=1 SV=2	SAM1 ETH10 YLR180W L9470.9	P10659	5.04	382	41818.3	2	Amino-acid biosynthesis; S-adenosyl-L-methionine biosynthesis; S-adenosyl-L-methionine from L-methionine: step 1/1.	0	ATP binding; S-adenosylmethionine biosynthetic process; cytoplasm; metal ion binding; methionine adenosyltransferase activity; methionine metabolic process; one-carbon metabolic process	0.00120367	9.72634e-05	0	0	---	0.000366289	5.89096e-05	0.000522971	0.000151088	0.700401	0.000453134	7.36561e-05	0.000940279	0.000184652	0.481914	0.000412766	8.53881e-05	0	0	---	0.000218218	4.76188e-05	0	0	---	0.000125838	0.000144583	0	0	---
Dihydrolipoyllysine-residue succinyltransferase component of 2-oxoglutarate dehydrogenase complex, mitochondrial OS=Saccharomyces cerevisiae (strain ATCC 204508 / S288c) GN=KGD2 PE=1 SV=2	KGD2 YDR148C YD8358.05C	P19262	UNDEFINED	463	0	2	Amino-acid degradation; L-lysine degradation via saccharopine pathway; glutaryl-CoA from L-lysine: step 6/6.	Mitochondrion.	2-oxoglutarate metabolic process; L-lysine catabolic process to acetyl-CoA via saccharopine; dihydrolipoyllysine-residue succinyltransferase activity; mitochondrial genome maintenance; mitochondrial nucleoid; mitochondrial oxoglutarate dehydrogenase complex; tricarboxylic acid cycle	---	---	---	---	---	0	0	8.37829e-05	9.71705e-05	0	4.93077e-05	8.54035e-05	6.34399e-05	0.000109881	0.777236	---	---	---	---	---	---	---	---	---	---	---	---	---	---	---
60S ribosomal protein L31-A OS=Saccharomyces cerevisiae (strain ATCC 204508 / S288c) GN=RPL31A PE=1 SV=1	RPL31A RPL34 RPL34A YDL075W D2478	P0C2H8	9.99	113	12821.9	0	0	Cytoplasm.	cytoplasmic translation; cytosolic large ribosomal subunit; regulation of translational fidelity; structural constituent of ribosome	0.00402759	0.00207727	0.00245152	0.000642389	1.6429	0.00450355	0.0005505	0.00344789	0.000193786	1.30618	0.00870903	0.00039537	0.00421277	0.00032233	2.06729	0.00736354	0.000373296	0.00170093	0.000598458	4.32912	0.00497376	0.000193283	0.00121567	0.000230218	4.09136	0.00454617	0.000396982	0.0016625	0.000317363	2.73453
V-type proton ATPase subunit H OS=Saccharomyces cerevisiae (strain ATCC 204508 / S288c) GN=VMA13 PE=1 SV=1	VMA13 CLS11 YPR036W YP3085.02	P41807	5.95	478	54415.8	0	0	Vacuole membrane; Peripheral membrane protein.	ATP hydrolysis coupled proton transport; fungal-type vacuole membrane; integral to membrane; proton-transporting ATPase activity, rotational mechanism; vacuolar acidification; vacuolar proton-transporting V-type ATPase, V1 domain	---	---	---	---	---	7.9783e-05	7.9414e-05	7.90661e-05	3.25497e-05	1.00907	9.08529e-05	7.89919e-05	2.23747e-05	3.87541e-05	4.06052	---	---	---	---	---	---	---	---	---	---	---	---	---	---	---
(DL)-glycerol-3-phosphatase 2 OS=Saccharomyces cerevisiae (strain ATCC 204508 / S288c) GN=HOR2 PE=1 SV=1	HOR2 GPP2 YER062C	P40106	5.81	250	27682.6	3	0	Cytoplasm.	cytoplasm; glycerol biosynthetic process; glycerol-1-phosphatase activity; nucleus; response to osmotic stress	0.000789036	0.000314796	0.000142707	0.000123909	5.52908	0.000457756	3.59148e-06	0.000338628	0.000493125	1.3518	0.000604062	0.000287209	0.000855273	0.000748521	0.706279	0.000164651	0.00017031	0	0	---	0.000381208	0.000218834	0	0	---	0.000444927	0.000163991	0	0	---
Enoyl-[acyl-carrier protein] reductase [NADPH, B-specific], mitochondrial OS=Saccharomyces cerevisiae (strain ATCC 204508 / S288c) GN=ETR1 PE=1 SV=3	ETR1 MRF1 MRF1' YBR026C YBR0310	P38071	8.85	380	40898.3	1	0	Mitochondrion matrix.	DNA binding; aerobic respiration; enoyl-[acyl-carrier-protein] reductase (NADPH, B-specific) activity; enoyl-[acyl-carrier-protein] reductase activity; fatty acid biosynthetic process; mitochondrial matrix; mitochondrion; trans-2-enoyl-CoA reductase (NADPH) activity; zinc ion binding	---	---	---	---	---	---	---	---	---	---	0.000108412	0.000187774	2.57655e-05	4.46272e-05	4.20763	---	---	---	---	---	---	---	---	---	---	---	---	---	---	---
Ubiquitin-conjugating enzyme E2 1 OS=Saccharomyces cerevisiae (strain ATCC 204508 / S288c) GN=UBC1 PE=1 SV=1	UBC1 YDR177W YD9395.10	P21734	5.09	215	24178.4	6	Protein modification; protein ubiquitination.	0	ATP binding; ER-associated protein catabolic process; endocytosis; proteasome complex; protein monoubiquitination; protein polyubiquitination; protein ubiquitination involved in ubiquitin-dependent protein catabolic process; response to stress; spore germination; ubiquitin-protein ligase activity; vesicle organization	---	---	---	---	---	0	0	0.000353889	7.94844e-05	0	0	0	0.000428676	0.000124466	0	0.000178375	0.000178117	0.000346153	0.000162786	0.515309	0.000113583	0.000196731	0.000467281	5.72902e-05	0.243072	0.000111039	0.000192326	0.000524117	0.000137311	0.21186
54S ribosomal protein L12, mitochondrial OS=Saccharomyces cerevisiae (strain ATCC 204508 / S288c) GN=MNP1 PE=1 SV=1	MNP1 MRPL12 YGL068W	P53163	5.58	194	16891.4	0	0	Mitochondrion.	aerobic respiration; mitochondrial nucleoid; ribosome; structural constituent of ribosome; translation	0.000136383	0.000118358	0.000314834	0.000331555	0.433191	0.00104837	0.000108968	0.000193575	0.000222753	5.41587	0.000205334	0.000355649	0.000263884	0.000246734	0.778123	0.00102466	6.15621e-05	0.000996064	0.000367882	1.02871	0.00253144	0.000423387	0.00118333	0.000359474	2.13924	0.00252034	0.000310408	0.0010158	0.000156907	2.48114
Coatomer subunit epsilon OS=Saccharomyces cerevisiae (strain ATCC 204508 / S288c) GN=SEC28 PE=1 SV=2	SEC28 YIL076W	P40509	4.44	296	33829	0	0	Cytoplasm. Golgi apparatus membrane; Peripheral membrane protein; Cytoplasmic side. Cytoplasmic vesicle â€º COPI-coated vesicle membrane; Peripheral membrane protein; Cytoplasmic side.	COPI vesicle coat; ER to Golgi vesicle-mediated transport; late endosome to vacuole transport via multivesicular body sorting pathway; protein transport; retrograde vesicle-mediated transport, Golgi to ER; structural molecule activity; vesicle coating	---	---	---	---	---	0	0	9.54803e-05	0.000165377	0	3.47943e-05	6.02654e-05	0.000139874	0.000164015	0.248755	---	---	---	---	---	---	---	---	---	---	---	---	---	---	---
Branched-chain-amino-acid aminotransferase, mitochondrial OS=Saccharomyces cerevisiae (strain ATCC 204508 / S288c) GN=BAT1 PE=1 SV=1	BAT1 ECA39 TWT1 YHR208W	P38891	8.48	393	41698.7	2	Amino-acid biosynthesis; L-isoleucine biosynthesis; L-isoleucine from 2-oxobutanoate: step 4/4. Amino-acid biosynthesis; L-leucine biosynthesis; L-leucine from 3-methyl-2-oxobutanoate: step 4/4. Amino-acid biosynthesis; L-valine biosynthesis; L-valine from pyruvate: step 4/4. Amino-acid biosynthesis; L-methionine biosynthesis via salvage pathway; L-methionine from S-methyl-5-thio-alpha-D-ribose 1…	Mitochondrion matrix.	L-isoleucine transaminase activity; L-leucine transaminase activity; L-methionine salvage from methylthioadenosine; L-valine transaminase activity; branched-chain amino acid biosynthetic process; branched-chain amino acid catabolic process; branched-chain-amino-acid transaminase activity; cellular response to UV; isoleucine biosynthetic process; leucine biosynthetic process; mitochondrial matrix;…	0.000233273	5.47349e-05	2.17497e-05	3.76716e-05	10.7253	0.000387883	0.000255091	0.00028977	6.98967e-05	1.33859	0.000170496	6.73276e-05	0.000236818	1.10603e-05	0.719945	---	---	---	---	---	---	---	---	---	---	---	---	---	---	---
Sterol 24-C-methyltransferase OS=Saccharomyces cerevisiae (strain ATCC 204508 / S288c) GN=ERG6 PE=1 SV=4	ERG6 ISE1 LIS1 SED6 YML008C YM9571.10C	P25087	5.54	383	43299.6	2	Steroid metabolism; ergosterol biosynthesis; ergosterol from zymosterol: step 1/5.	0	endoplasmic reticulum; ergosterol biosynthetic process; lipid particle; mitochondrial outer membrane; sterol 24-C-methyltransferase activity	---	---	---	---	---	---	---	---	---	---	0.000143192	0.000135034	2.55637e-05	4.42776e-05	5.60137	0	0	0.00016933	4.81083e-05	0	0	0	0.000143675	5.88629e-06	0	0	0	0.000146876	2.73608e-06	0
DNA-directed RNA polymerase III subunit RPC4 OS=Saccharomyces cerevisiae (strain ATCC 204508 / S288c) GN=RPC53 PE=1 SV=2	RPC53 RPC4 YDL150W D1557	P25441	8.59	422	46667.4	0	0	Nucleus.	DNA binding; DNA-directed RNA polymerase III complex; DNA-directed RNA polymerase activity; tRNA transcription from RNA polymerase III promoter	---	---	---	---	---	---	---	---	---	---	0	0	4.99395e-05	8.64977e-05	0	---	---	---	---	---	---	---	---	---	---	---	---	---	---	---
Suppressor of kinetochore protein 1 OS=Saccharomyces cerevisiae (strain ATCC 204508 / S288c) GN=SKP1 PE=1 SV=2	SKP1 CBF3D YDR328C D9798.14	P52286	4.35	194	22199.1	0	Protein modification; protein ubiquitination.	Cytoplasm. Nucleus. Chromosome â€º centromere â€º kinetochore.	CBF3 complex; DNA replication origin binding; G1/S transition of mitotic cell cycle; G2/M transition of mitotic cell cycle; RAVE complex; SCF ubiquitin ligase complex; SCF-dependent proteasomal ubiquitin-dependent protein catabolic process; condensed chromosome kinetochore; cytokinesis; kinetochore; kinetochore assembly; nucleus; protein neddylation; protein ubiquitination involved in ubiquitin-d…	0.000131296	0.000227411	0.00101796	0.000140419	0.12898	0	0	0.00010093	0.000174817	0	0	0	0.000374142	0.000100311	0	0.000951325	0.000206112	0.000908588	0.000458353	1.04704	0.00104433	0.000182666	0.00136539	0.000517182	0.764861	0.00113397	0.000150607	0.00149722	0.000214841	0.757381
Cell wall mannoprotein HSP150 OS=Saccharomyces cerevisiae (strain ATCC 204508 / S288c) GN=HSP150 PE=1 SV=2	HSP150 CCW7 ORE1 PIR2 YJL159W J0558	P32478	4.59	413	33811.1	0	0	Secreted â€º cell wall.	ATPase activity; extracellular region; fungal-type cell wall; fungal-type cell wall organization; response to stress; structural constituent of cell wall	0	0	0.000893912	0.000174857	0	9.19095e-05	0.000159192	0.000435679	6.94475e-05	0.210957	3.21508e-05	5.56868e-05	0.000546952	0.000137974	0.0587817	0.00028879	1.73507e-05	0.0003825	0.00033529	0.755007	0.000260968	8.99513e-05	0.000487796	2.71633e-05	0.534993	0.000267417	1.06652e-05	0.000498986	0.000101861	0.53592
Actin-related protein 2/3 complex subunit 4 OS=Saccharomyces cerevisiae (strain ATCC 204508 / S288c) GN=ARC19 PE=1 SV=2	ARC19 YKL013C YKL166	P33204	5.31	171	19915.9	0	0	Cytoplasm â€º cytoskeleton â€º actin patch.	Arp2/3 complex-mediated actin nucleation; Arp2/3 protein complex; actin cortical patch; actin cortical patch assembly; actin filament polymerization; mitochondrion inheritance; structural molecule activity	---	---	---	---	---	---	---	---	---	---	0.000523198	0.00035507	0.000180499	0.000185018	2.89862	---	---	---	---	---	---	---	---	---	---	---	---	---	---	---
ATPase GET3 OS=Saccharomyces cerevisiae (strain ATCC 204508 / S288c) GN=GET3 PE=1 SV=1	GET3 ARR4 YDL100C D2371	Q12154	4.85	354	39353.7	3	0	Cytoplasm. Endoplasmic reticulum. Golgi apparatus.	ATP binding; ATPase activity; GET complex; Golgi apparatus; guanyl-nucleotide exchange factor activity; metal ion binding; pheromone-dependent signal transduction involved in conjugation with cellular fusion; posttranslational protein targeting to membrane; protein insertion into ER membrane; response to arsenic-containing substance; response to heat; response to metal ion; retrograde vesicle-med…	---	---	---	---	---	---	---	---	---	---	0	0	9.01904e-05	9.06397e-05	0	---	---	---	---	---	---	---	---	---	---	---	---	---	---	---
FK506-binding nuclear protein OS=Saccharomyces cerevisiae (strain ATCC 204508 / S288c) GN=FPR3 PE=1 SV=2	FPR3 NPI46 YML074C	P38911	4.36	411	46553.1	5	0	Nucleus â€º nucleolus.	FK506 binding; histone peptidyl-prolyl isomerization; meiotic recombination checkpoint; membrane; nucleolus; peptidyl-prolyl cis-trans isomerase activity; protein folding	0.000255549	0.000144126	6.23916e-05	0.000108065	4.09589	0.000246864	0.000266493	6.93486e-05	1.88993e-06	3.55976	0.000129229	0.000223831	0.000126374	0.00016101	1.02259	0.000639086	0.00017418	0.000109525	0.000136332	5.83506	0.000378599	5.45631e-05	0.000131638	0.000110122	2.87607	0.000623172	0.000161849	4.56292e-05	3.95366e-05	13.6573
Cytochrome b-c1 complex subunit 1, mitochondrial OS=Saccharomyces cerevisiae (strain ATCC 204508 / S288c) GN=COR1 PE=1 SV=1	COR1 QCR1 YBL045C YBL0403	P07256	5.91	457	47409.5	0	0	Mitochondrion inner membrane.	aerobic respiration; catalytic activity; electron transport chain; integral to membrane; metal ion binding; mitochondrial respiratory chain complex III	---	---	---	---	---	0.000138867	4.73201e-05	6.31768e-05	6.42964e-05	2.19807	0.000105624	5.96148e-05	0	0	---	0	0	0.000160759	6.76328e-05	0	2.64254e-05	4.57702e-05	3.96536e-05	6.86821e-05	0.666406	0	0	0.000122719	5.98923e-05	0
ATP-dependent RNA helicase DHH1 OS=Saccharomyces cerevisiae (strain ATCC 204508 / S288c) GN=DHH1 PE=1 SV=1	DHH1 YDL160C	P39517	8.06	506	57544	3	0	Cytoplasm â€º P-body.	ATP binding; ATP-dependent RNA helicase activity; RNA binding; cytoplasmic mRNA processing body; cytoplasmic mRNA processing body assembly; cytoplasmic stress granule; deadenylation-dependent decapping of nuclear-transcribed mRNA; mRNA processing; mRNA transport; regulation of translation; stress granule assembly	---	---	---	---	---	---	---	---	---	---	9.31912e-05	8.26162e-05	0	0	---	---	---	---	---	---	---	---	---	---	---	---	---	---	---	---
T-complex protein 1 subunit beta OS=Saccharomyces cerevisiae (strain ATCC 204508 / S288c) GN=CCT2 PE=1 SV=1	CCT2 BIN3 TCP2 YIL142W	P39076	5.79	527	57203.4	0	0	Cytoplasm.	ATP binding; chaperonin-containing T-complex; protein folding; unfolded protein binding	---	---	---	---	---	0.000193143	4.25348e-05	5.38385e-05	5.29171e-05	3.58745	5.86287e-05	0.000101548	0	0	---	---	---	---	---	---	---	---	---	---	---	---	---	---	---	---
Uncharacterized protein YBR085C-A OS=Saccharomyces cerevisiae (strain ATCC 204508 / S288c) GN=YBR085C-A PE=1 SV=1	YBR085C-A	O43137	5.21	85	9404.52	0	0	Cytoplasm. Nucleus.	cytoplasm; nucleus	0	0	0.00177967	0.00072853	0	0	0	0.00246525	0.000736533	0	0	0	0.00242025	0.000298588	0	0	0	0.00421373	0.000520959	0	0	0	0.00472388	0.00101696	0	0.000150978	0.000261502	0.00419128	0.000956545	0.036022
Proteasome subunit alpha type-2 OS=Saccharomyces cerevisiae (strain ATCC 204508 / S288c) GN=PRE8 PE=1 SV=1	PRE8 PRS4 YML092C	P23639	5.52	250	27161.9	3	0	Cytoplasm. Nucleus.	nuclear outer membrane-endoplasmic reticulum membrane network; nucleus; proteasomal ubiquitin-dependent protein catabolic process; proteasomal ubiquitin-independent protein catabolic process; proteasome core complex, alpha-subunit complex; proteasome storage granule; threonine-type endopeptidase activity	---	---	---	---	---	0.000407185	0.000232866	0	0	---	0.000396072	0.000229664	0.000117491	0.0002035	3.37109	---	---	---	---	---	---	---	---	---	---	---	---	---	---	---
UPF0364 protein YMR027W OS=Saccharomyces cerevisiae (strain ATCC 204508 / S288c) GN=YMR027W PE=1 SV=1	YMR027W YM9711.17	Q04371	5.48	470	54128.7	0	0	0	cytoplasm; nucleus	0.000110489	0.000123539	0	0	---	---	---	---	---	---	0.00012699	5.43619e-05	0	0	---	---	---	---	---	---	---	---	---	---	---	---	---	---	---	---
Actin-related protein 2/3 complex subunit 5 OS=Saccharomyces cerevisiae (strain ATCC 204508 / S288c) GN=ARC15 PE=1 SV=1	ARC15 YIL062C	P40518	5.13	154	17134.4	0	0	Cytoplasm â€º cytoskeleton â€º actin patch.	Arp2/3 protein complex; actin cortical patch; actin cortical patch assembly; extrinsic to mitochondrial outer membrane; mRNA binding; mitochondrion inheritance; regulation of actin filament polymerization; structural molecule activity	0.00016779	0.00029062	0.0014972	0.000988189	0.112069	0.000578722	0.000148188	0.00036692	0.00017614	1.57724	0	0	0.000397027	0.0001823	0	0.000830343	0.000760175	0.00113671	0.000271509	0.730479	0.0010786	0.00044987	0.00071336	0.000169442	1.512	0.00118293	0.000594119	0.00127964	0.000197663	0.924422
Mitochondrial intermembrane space import and assembly protein 40 OS=Saccharomyces cerevisiae (strain ATCC 204508 / S288c) GN=MIA40 PE=1 SV=2	MIA40 TIM40 YKL195W	P36046	4.29	403	40866.1	0	0	Mitochondrion inner membrane; Single-pass type II membrane protein; Intermembrane side.	integral to membrane; mitochondrial inner membrane; mitochondrial intermembrane space; mitochondrial outer membrane translocase complex; protein disulfide oxidoreductase activity; protein folding; protein import into mitochondrial intermembrane space	0	0	0.00040335	0.000124389	0	---	---	---	---	---	0	0	7.73724e-05	7.97109e-05	0	0.000391533	0.000247693	0.000800524	5.52102e-05	0.489096	0.000414887	4.53287e-05	0.000936606	0.000239772	0.442969	0.000238295	0.000225488	0.000858638	0.00020988	0.277526
Actin-like protein ARP8 OS=Saccharomyces cerevisiae (strain ATCC 204508 / S288c) GN=ARP8 PE=1 SV=1	ARP8 YOR141C YOR3348C	Q12386	4.69	881	100209	0	0	Nucleus. Cytoplasm â€º cytoskeleton.	ATP binding; Ino80 complex; chromatin remodeling; cytoplasm; cytoskeleton; mRNA binding; mitotic recombination; regulation of transcription, DNA-dependent; response to DNA damage stimulus; transcription, DNA-dependent	---	---	---	---	---	---	---	---	---	---	2.59132e-05	4.48829e-05	2.39211e-05	4.14325e-05	1.08328	---	---	---	---	---	---	---	---	---	---	---	---	---	---	---
[truncated: 813 more rows]

## Sheet: Table S2 - Corona proteins list
	NP corona proteins
	Environmental condition [to right]	10mM NaPi, pH 7.4			0.1mM Cys	0.8mM NaCl	3.0mM NaCl
Protein accession number	AgNP (surface charge) size [to right] / protein name [below]	(-) 10nm	(+) 10nm	(-) 100nm	(-) 10nm	(-) 10nm	(-) 10nm
P10622	60S acidic ribosomal protein P1-beta OS=Saccharomyces cerevisiae (strain ATCC 204508 / S288c) GN=RPP1B PE=1 SV=3	X	X	X	X	X	X			Legend
[truncated: 786 more rows]
